# Supplementary figures and images for: TCA Cycle and Its Relationship with Clavulanic Acid Production: A Further Interpretation by Using a Reduced Genome-Scale Metabolic Model of Streptomyces clavuligerus (part 1 of 2)
Source: MDPI journal article supplement (doi:10.3390/bioengineering8080103), 2021-07-22

# Oxidative Phosphorylation (L<sub>L</sub> ACD2)

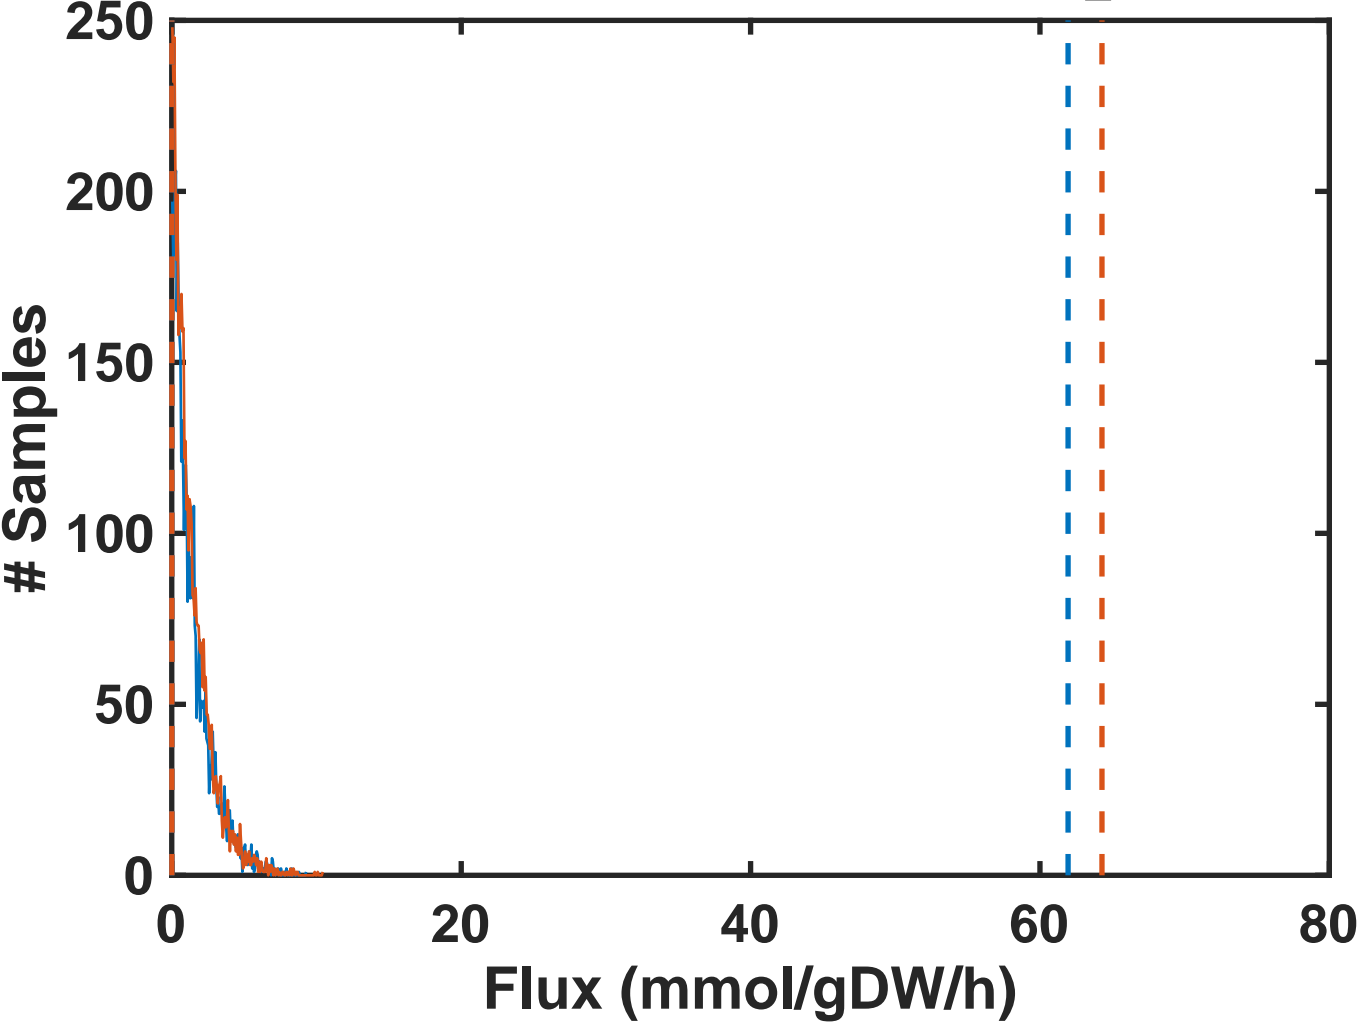

Supplement: s1 [file s1]

# Glycolysis/Gluconeogenesis (PGI)

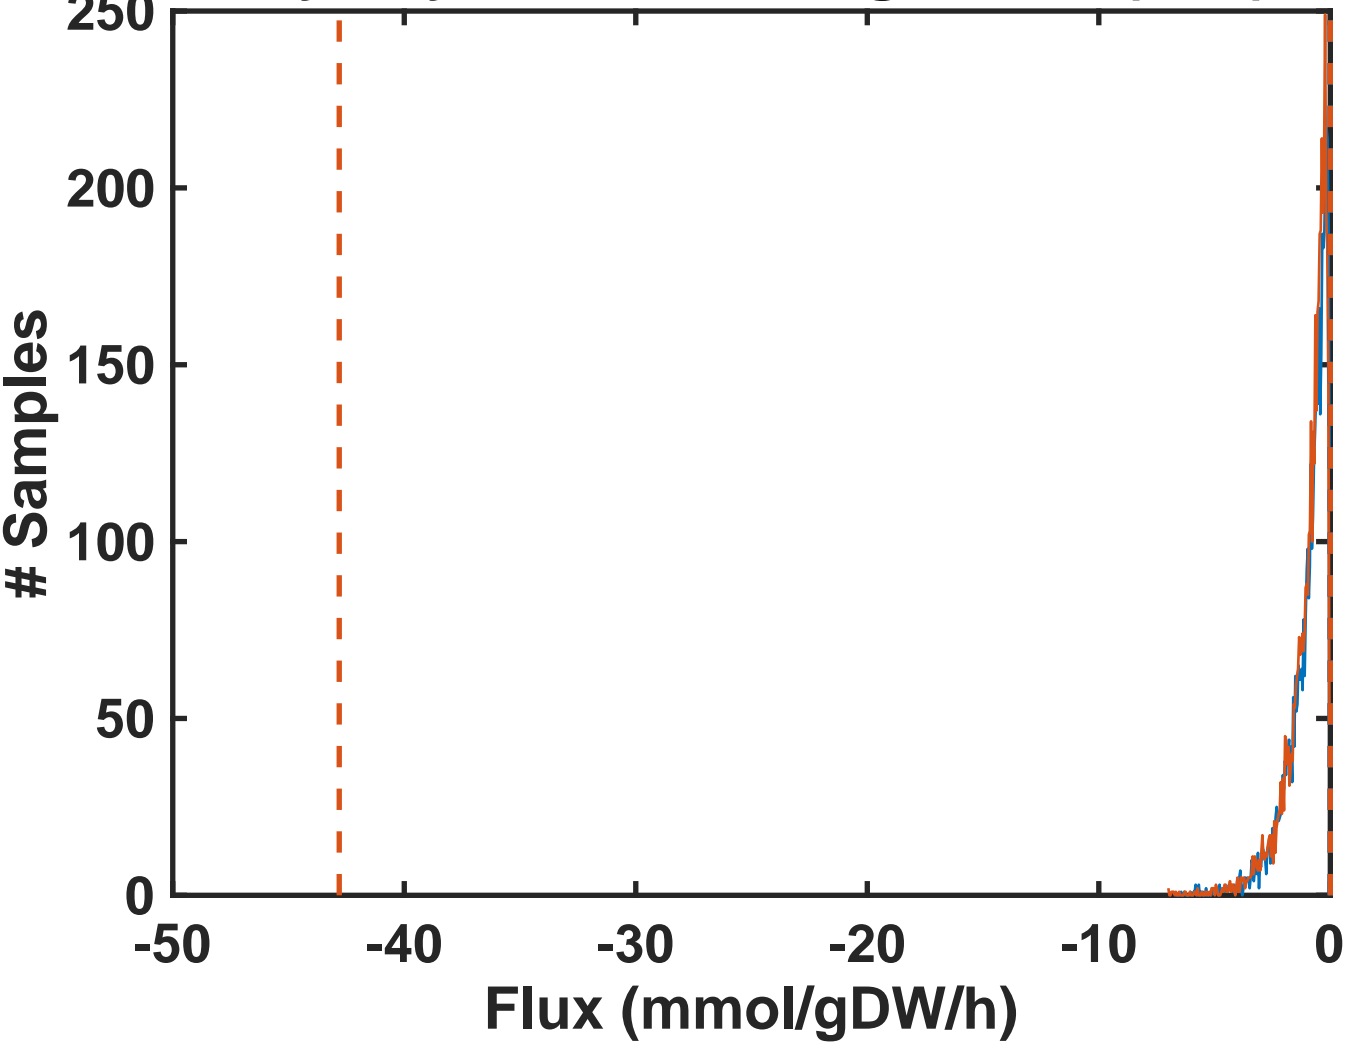

Supplement: s1 [file s1]

## Glycolysis/Gluconeogenesis (GAPD)

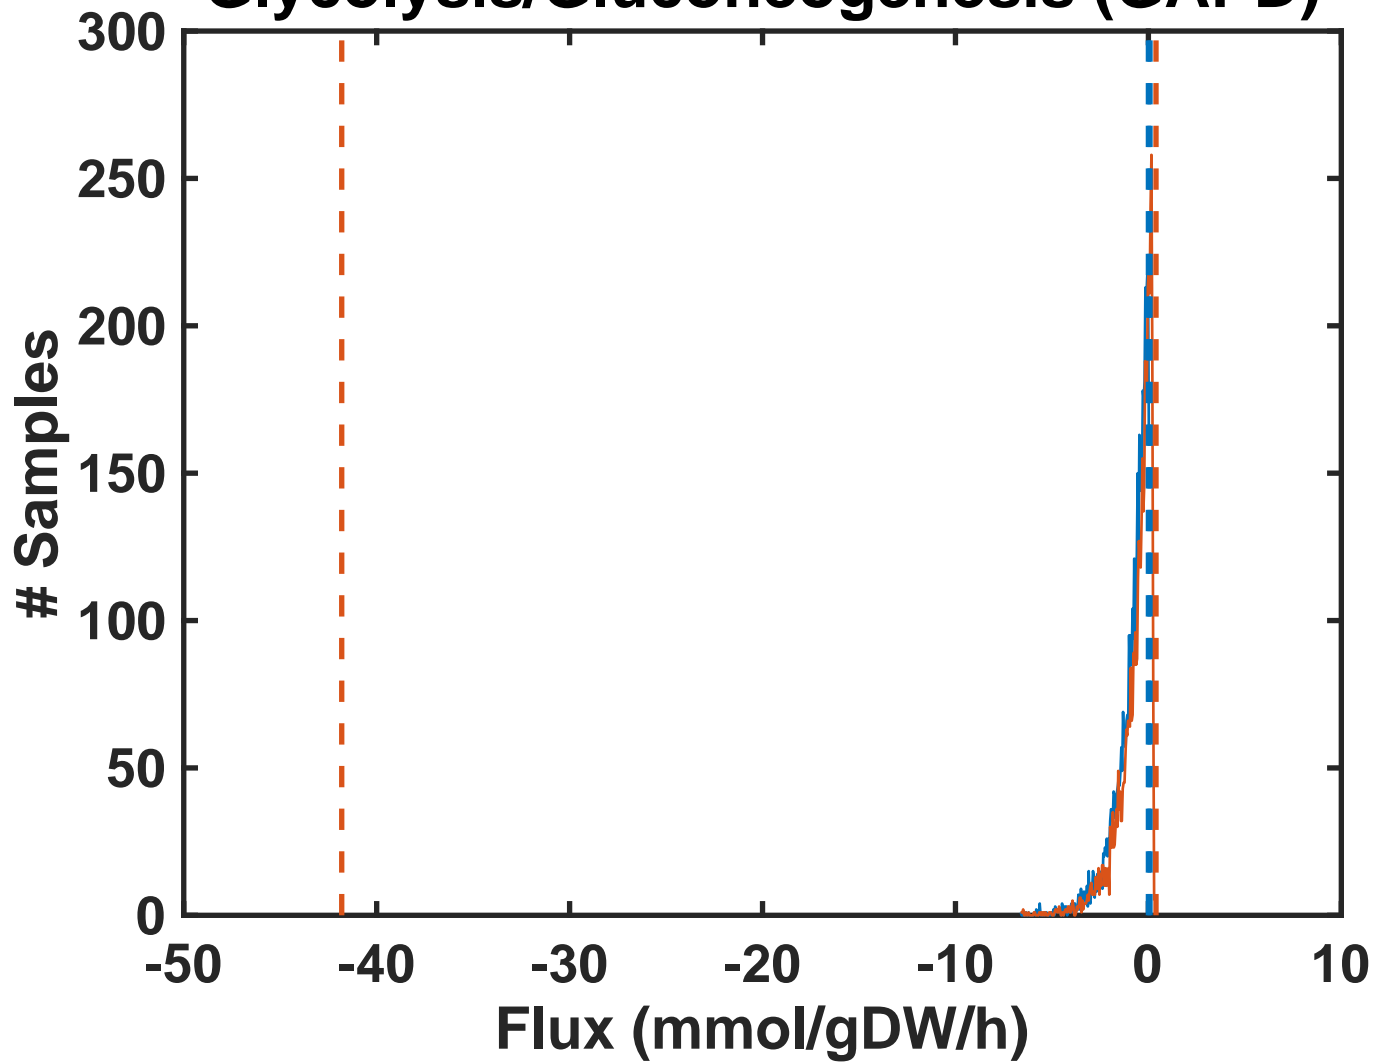

Supplement: s1 [file s1]

## Pyruvate Metabolism (LDH<sub>D</sub>)

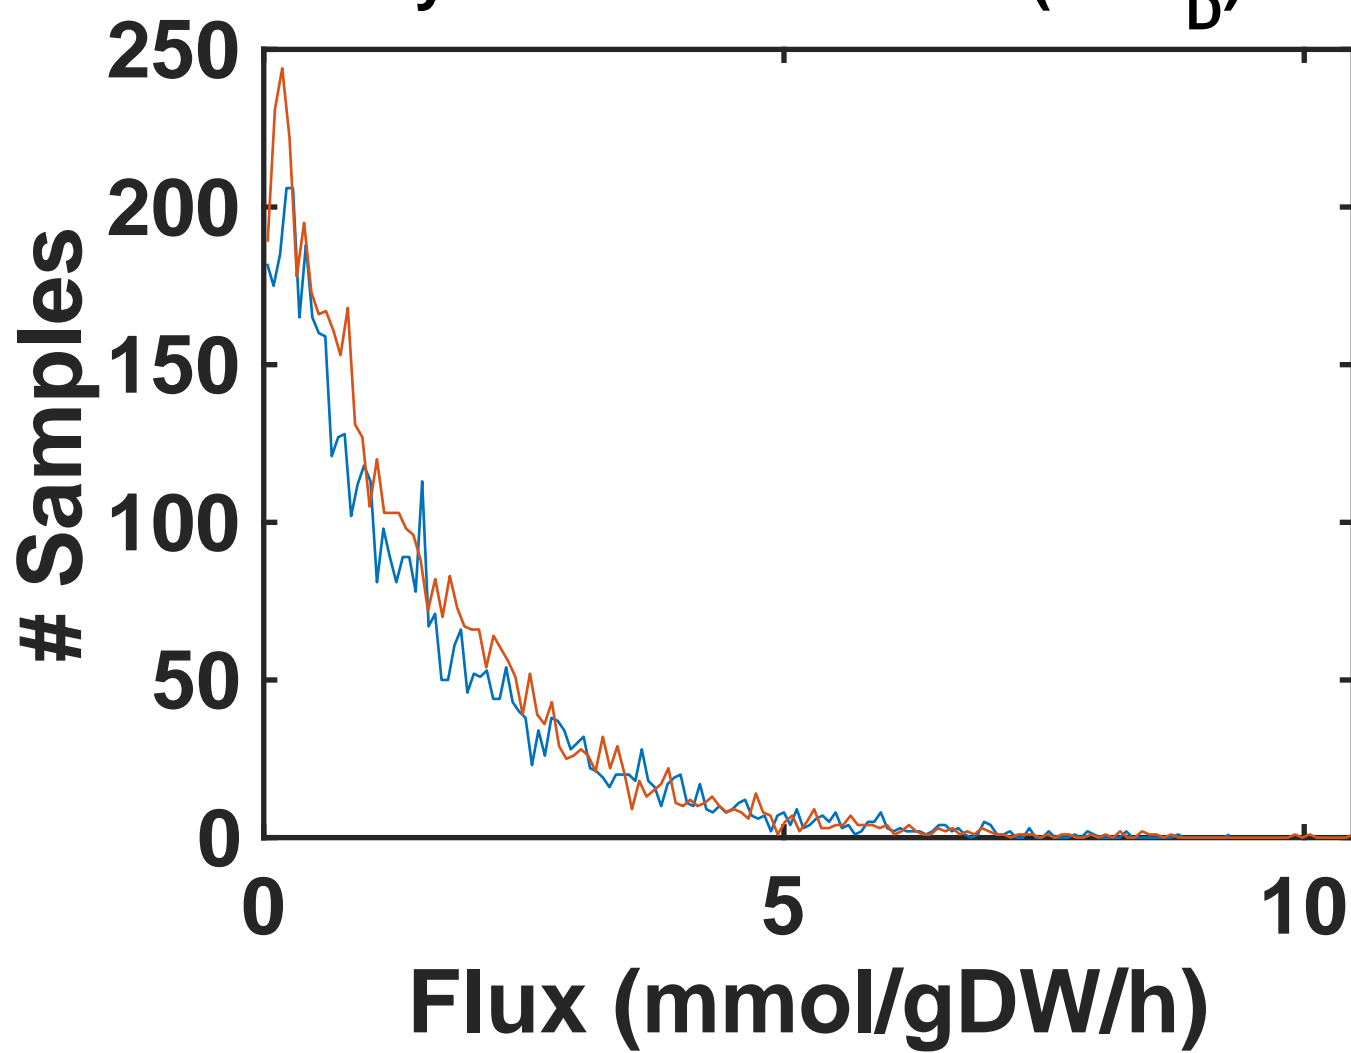

Supplement: s1 [file s1]

## Clavulanic acid biosynthesis (CS2)

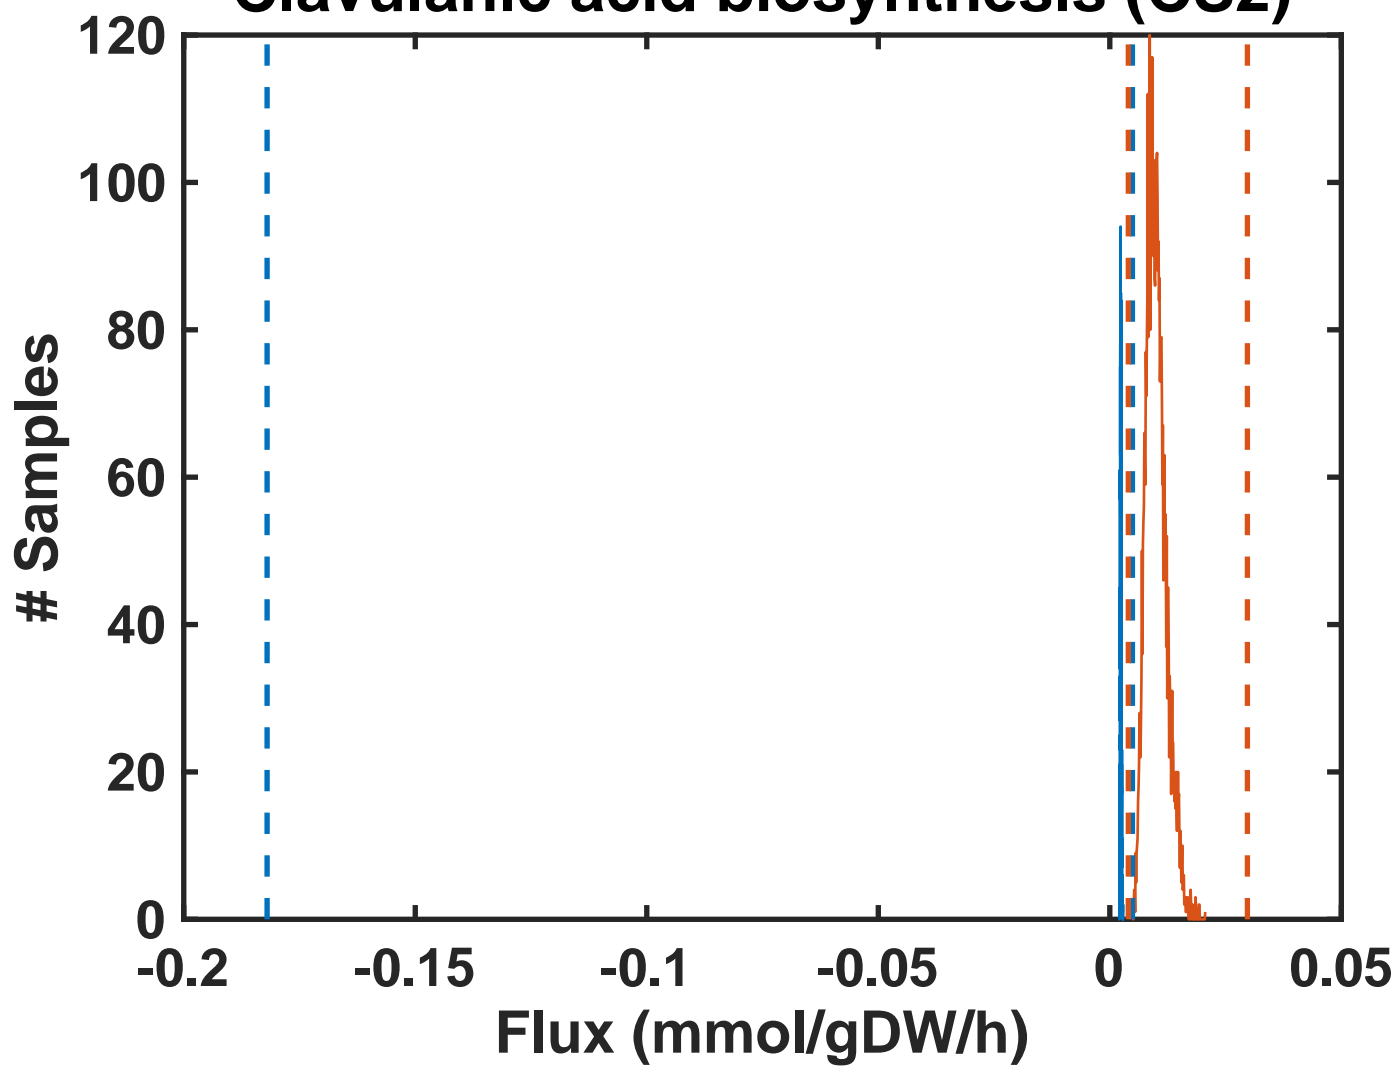

Supplement: s1 [file s1]

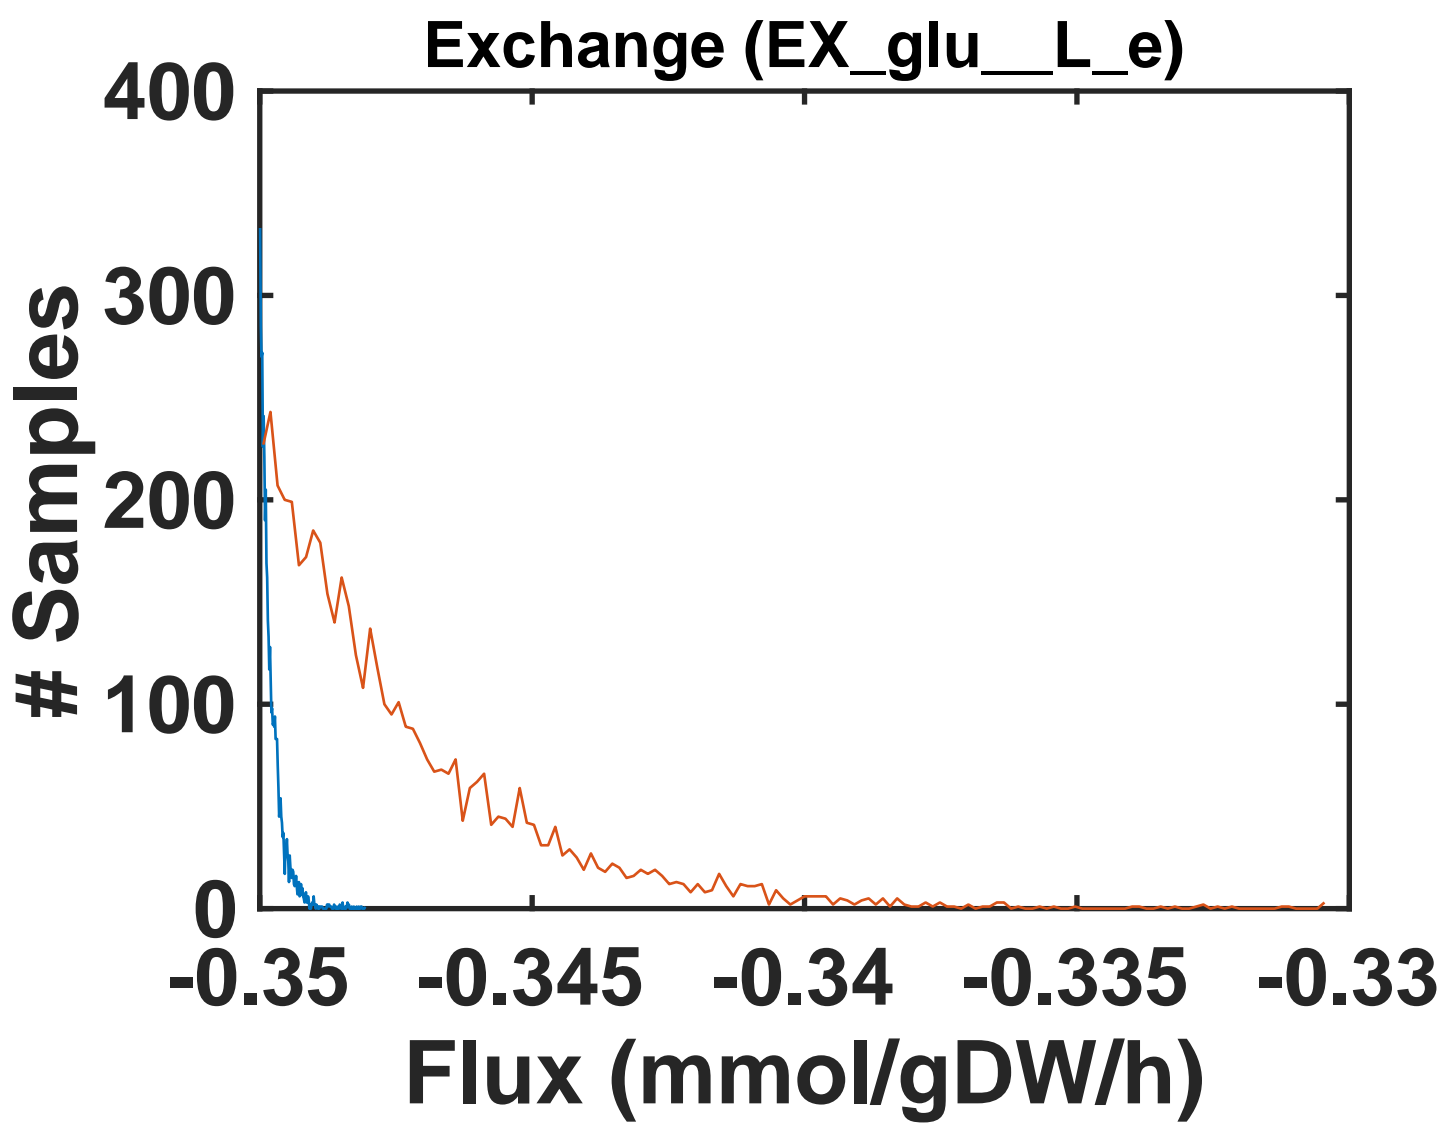

Supplement: s1 [file s1]

## Anaplerotic Reactions (ME1)

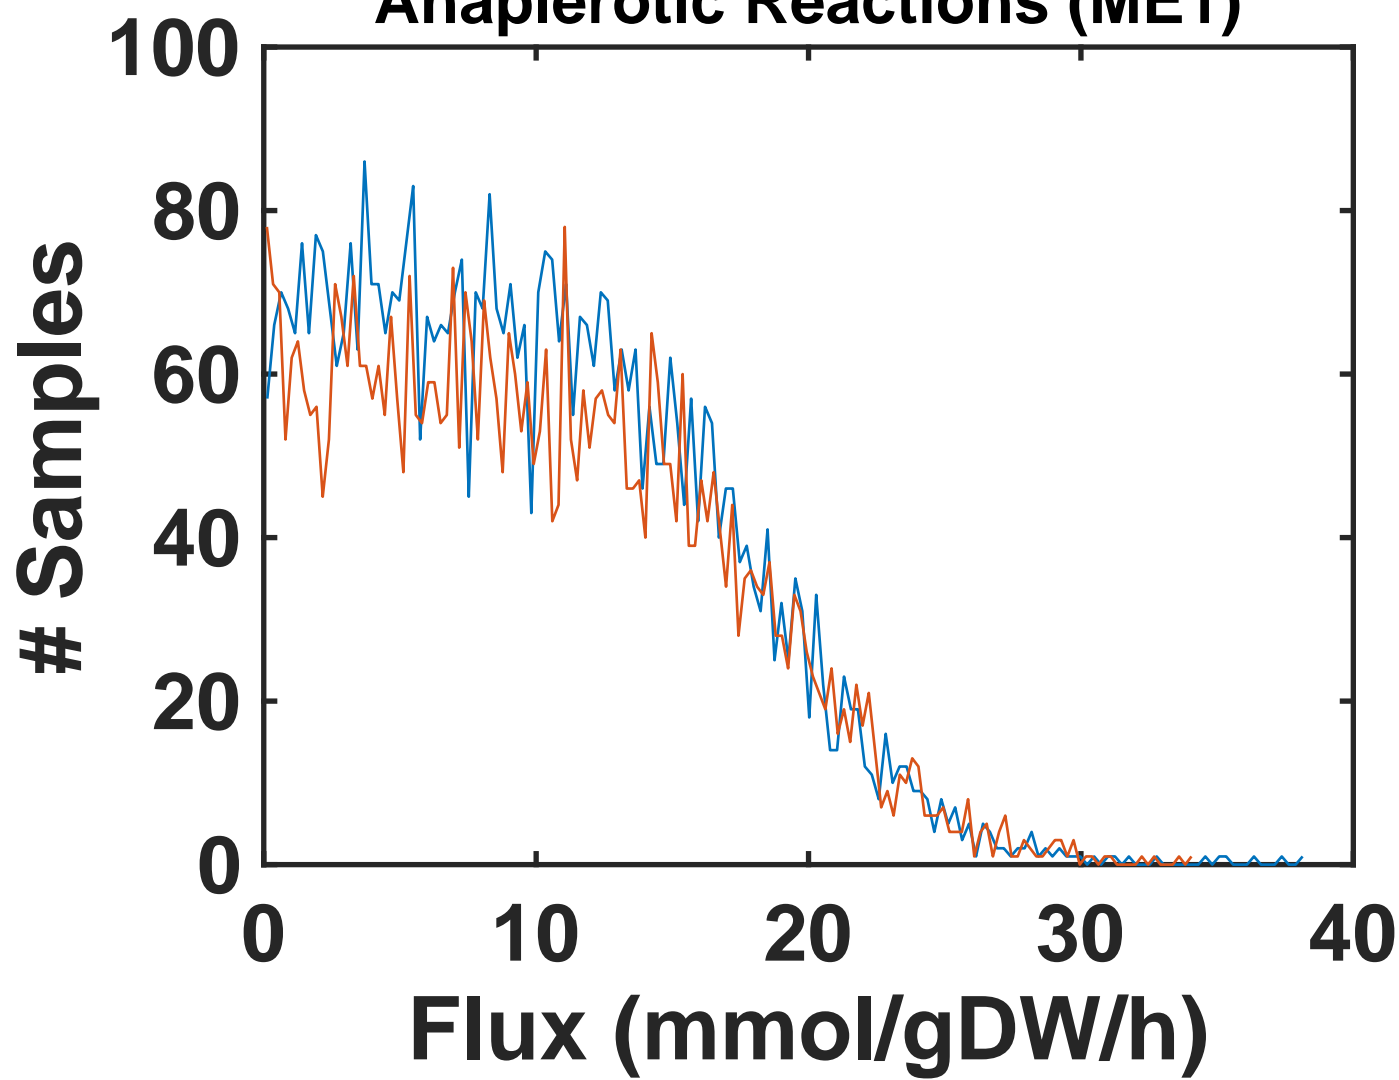

Supplement: s1 [file s1]

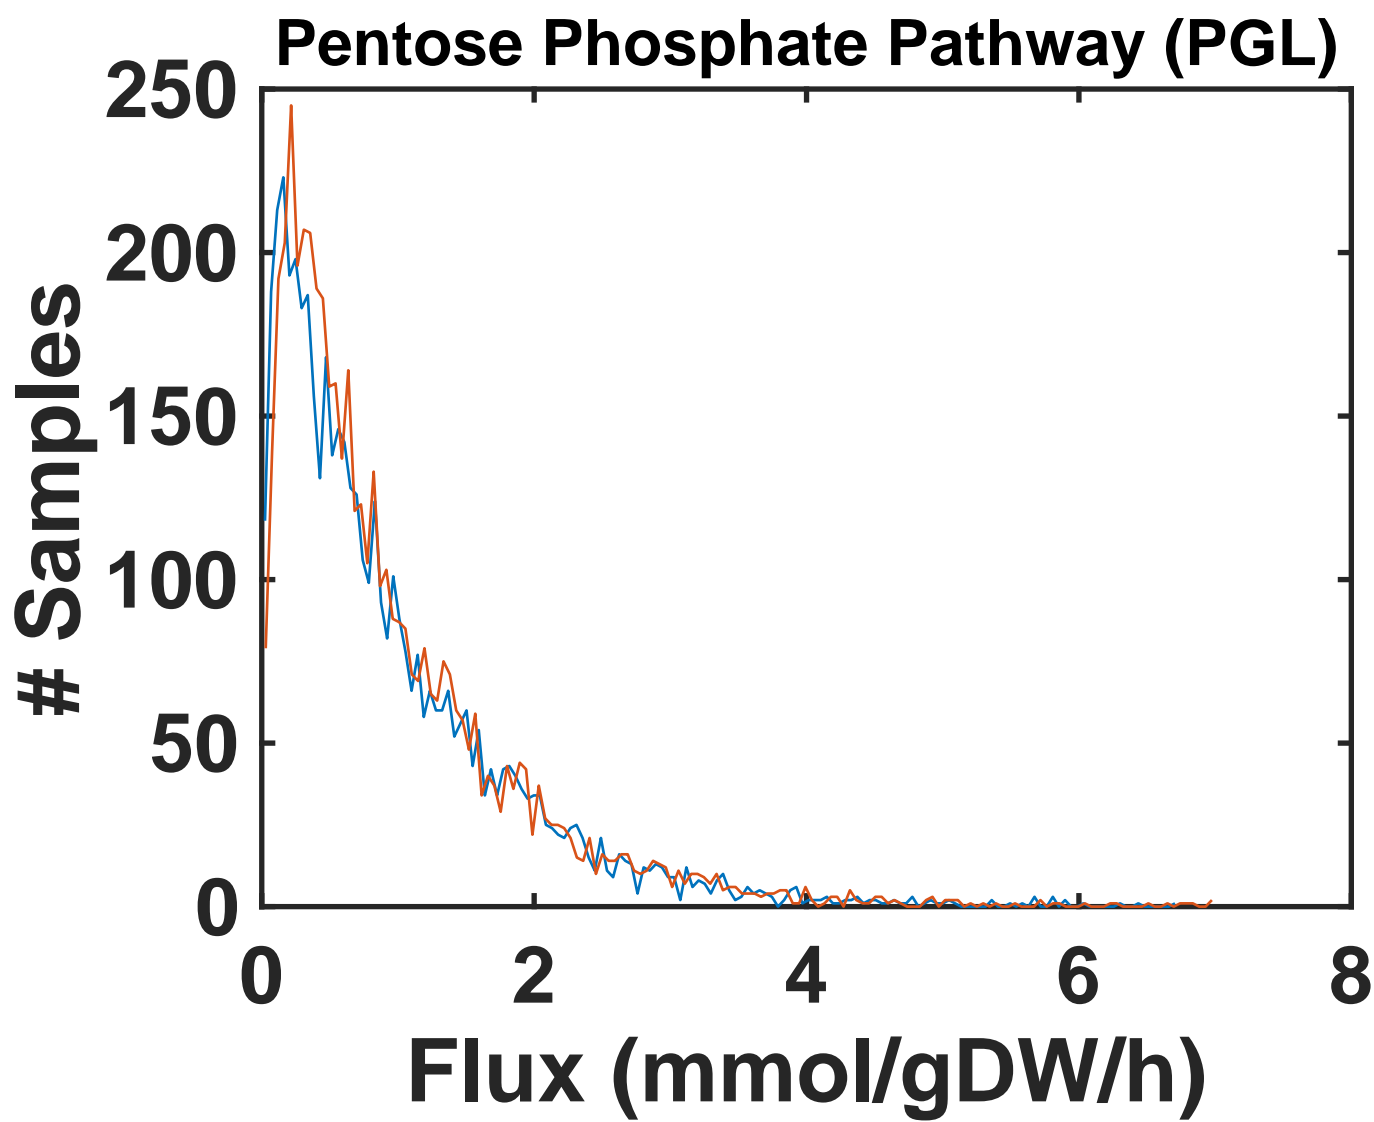

Supplement: s1 [file s1]

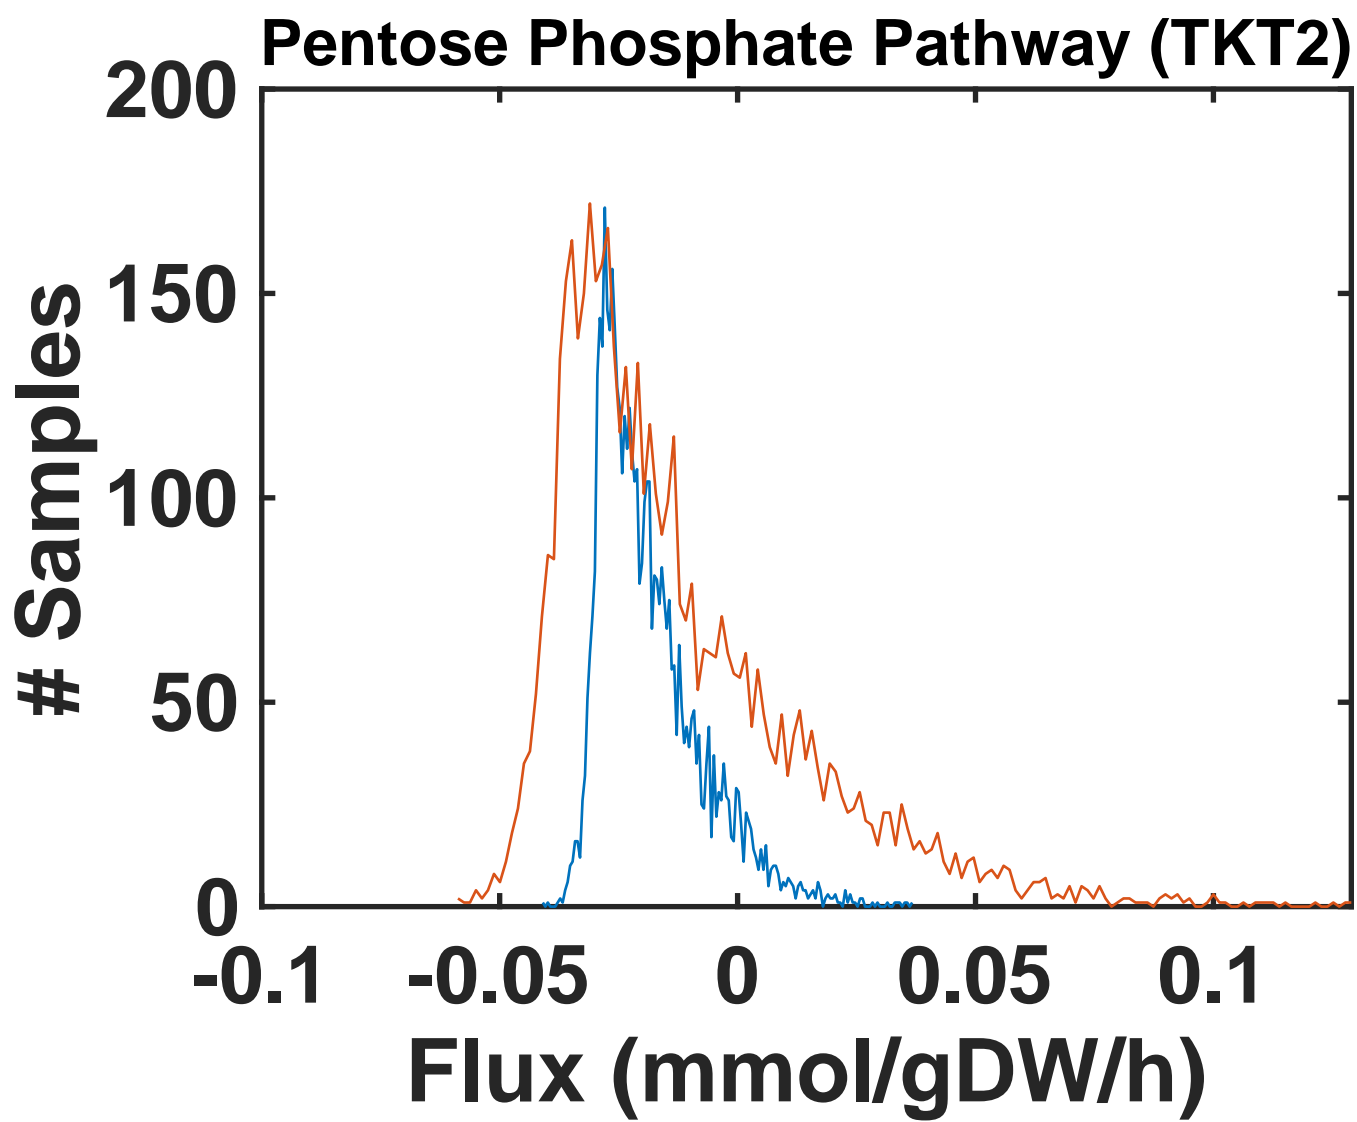

Supplement: s1 [file s1]

# Exchange ( $EX_{pe}$ )

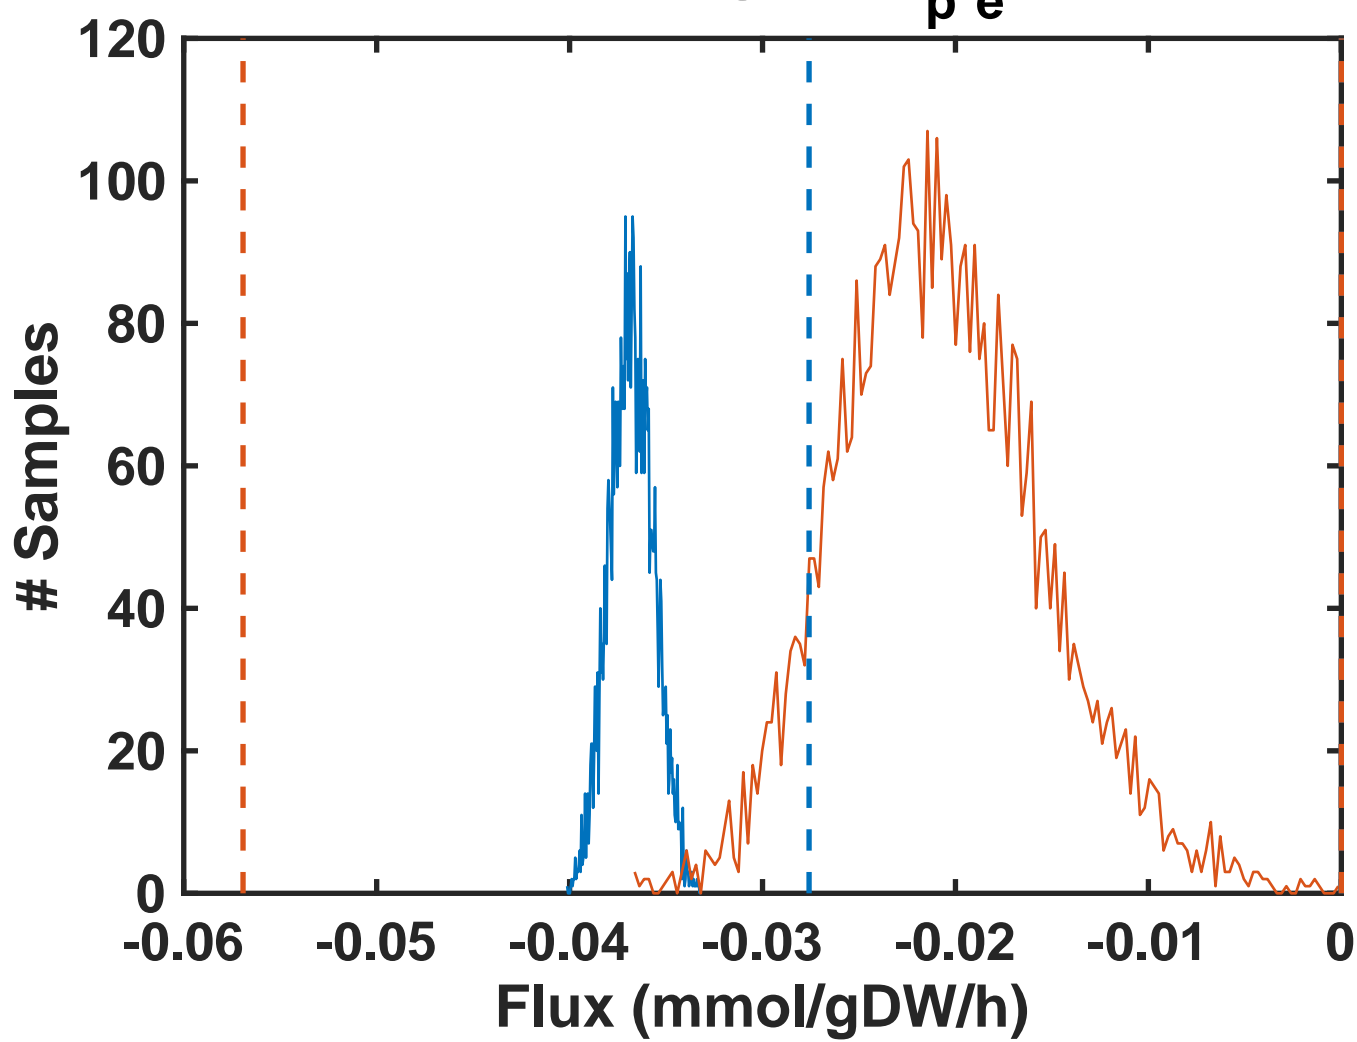

Supplement: s1 [file s1]

## Anaplerotic Reactions (PPC)

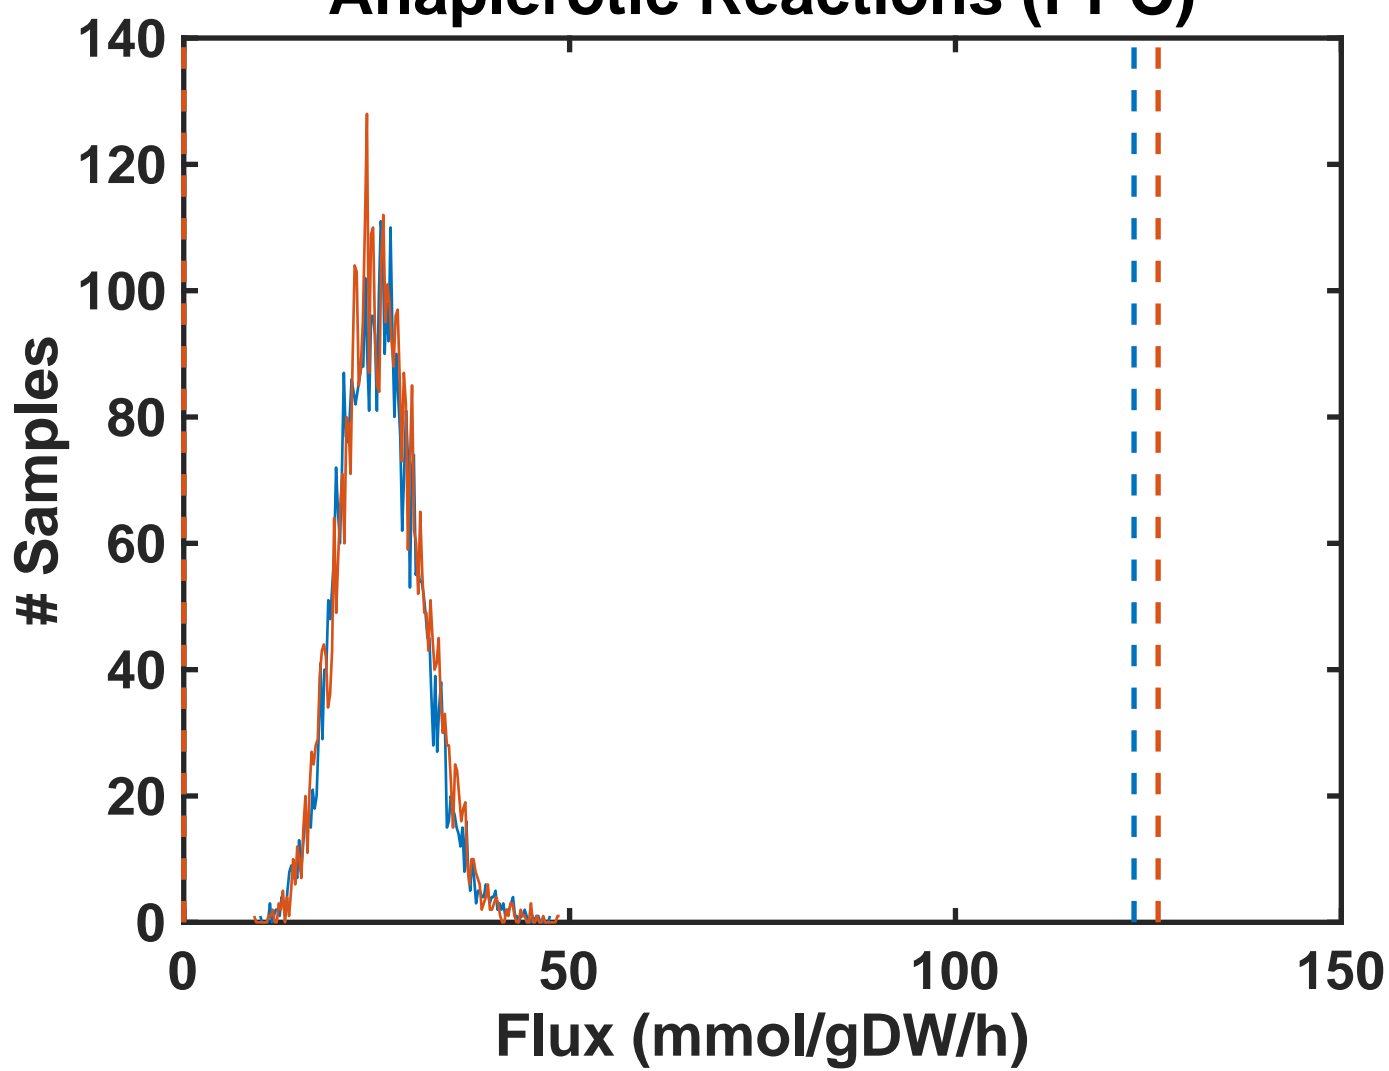

Supplement: s1 [file s1]

# Citric Acid Cycle (ICDHyr)

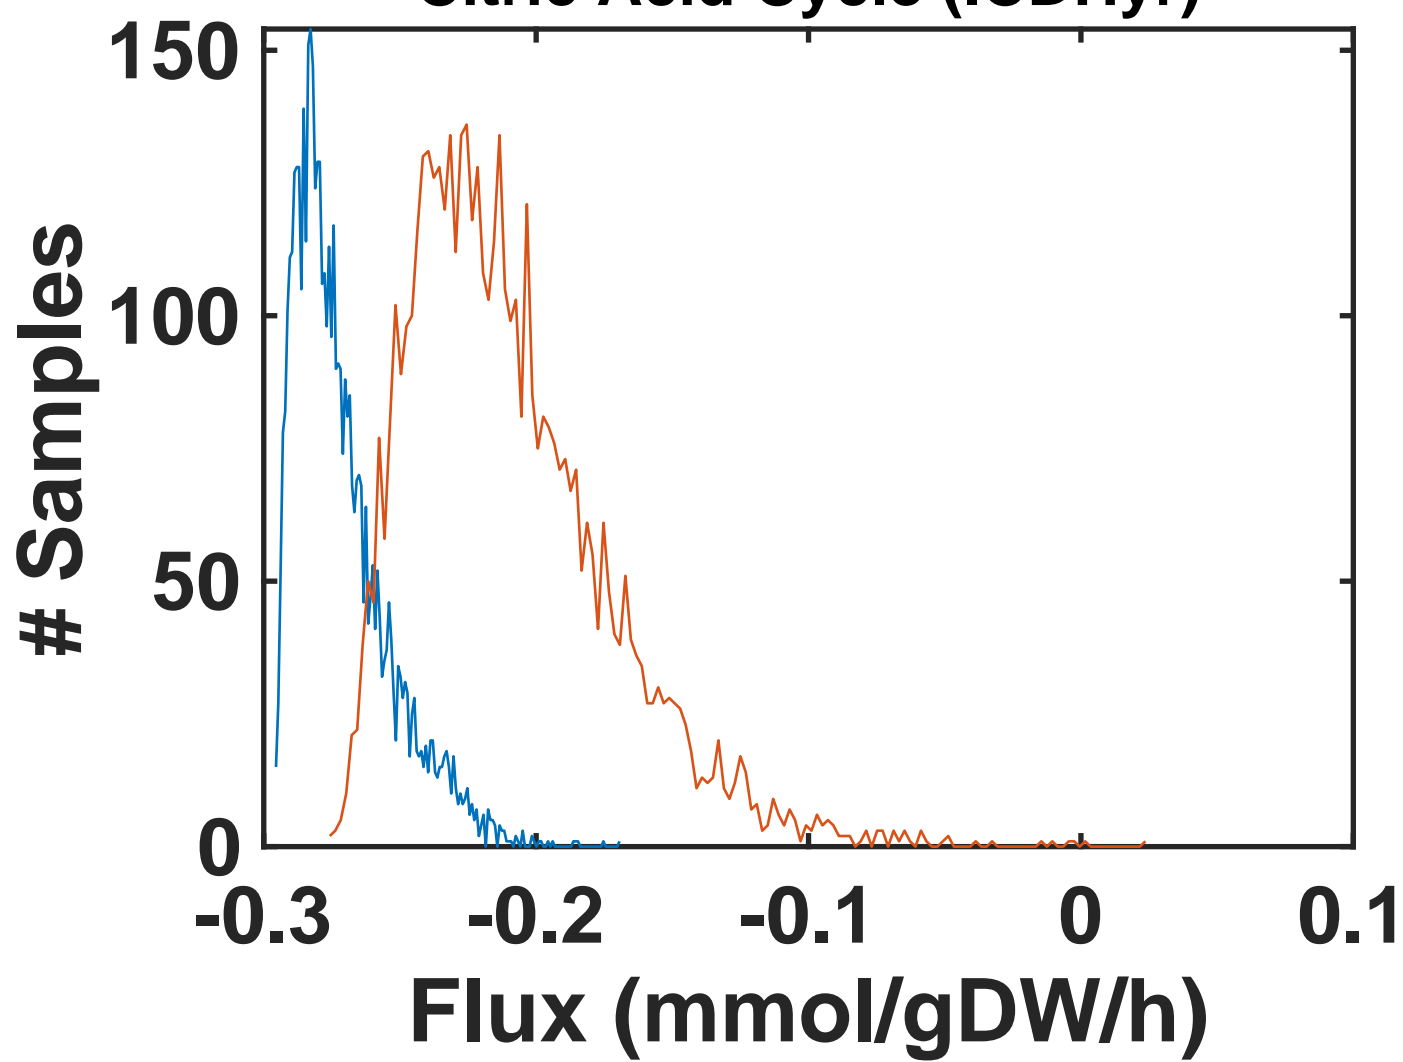

Supplement: s1 [file s1]

# Glutamate metabolism (GLUDxi)

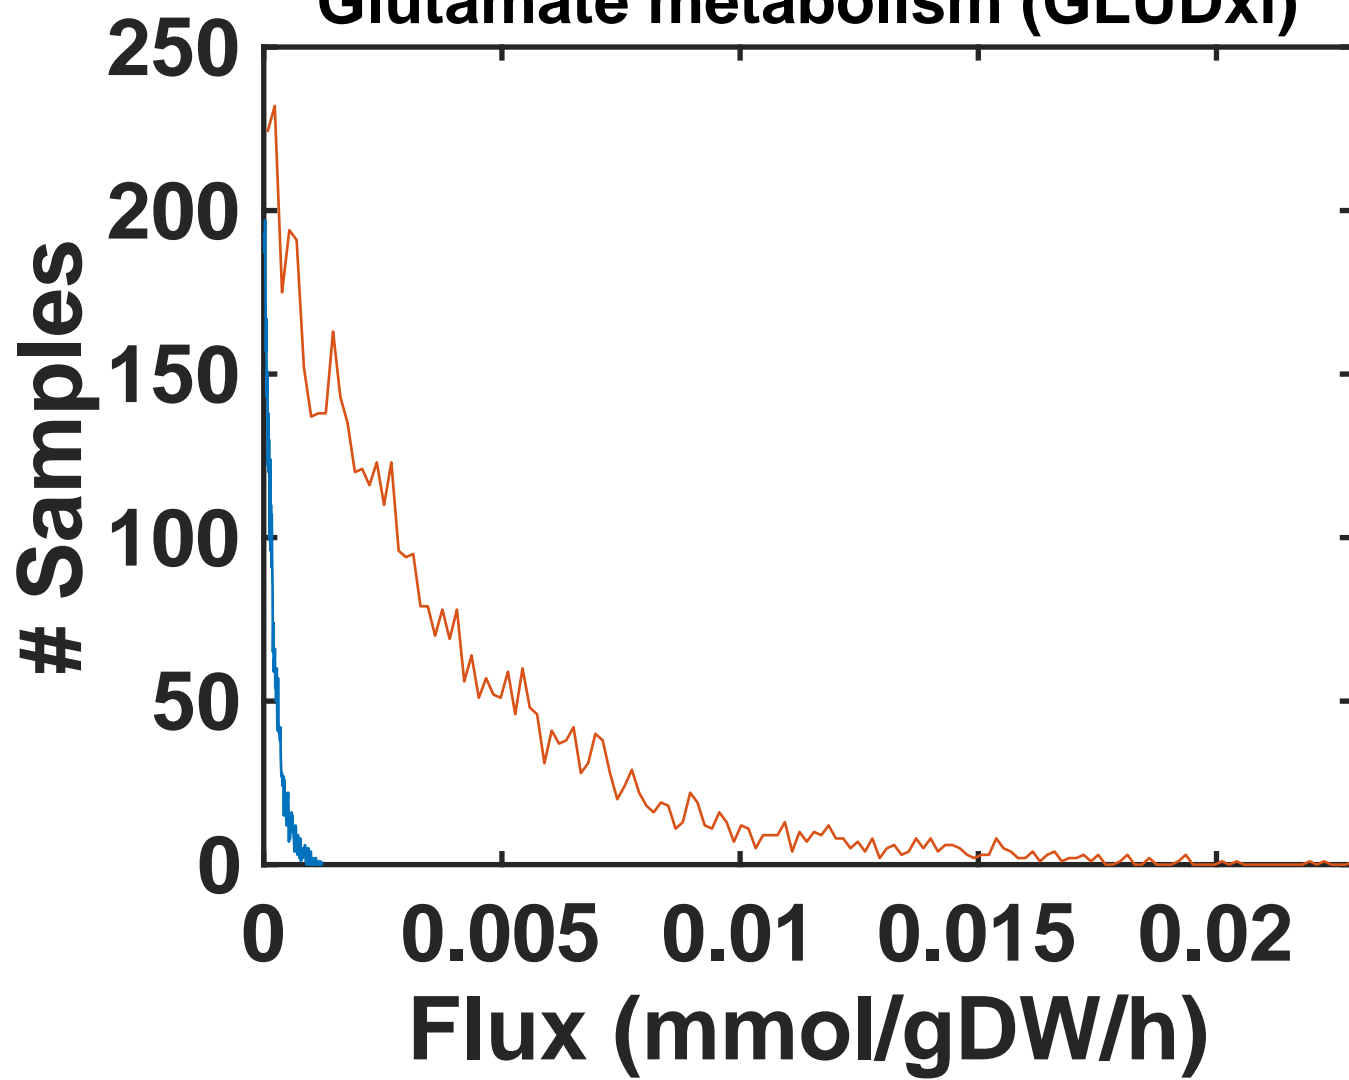

Supplement: s1 [file s1]

## Anaplerotic Reactions (MALS)

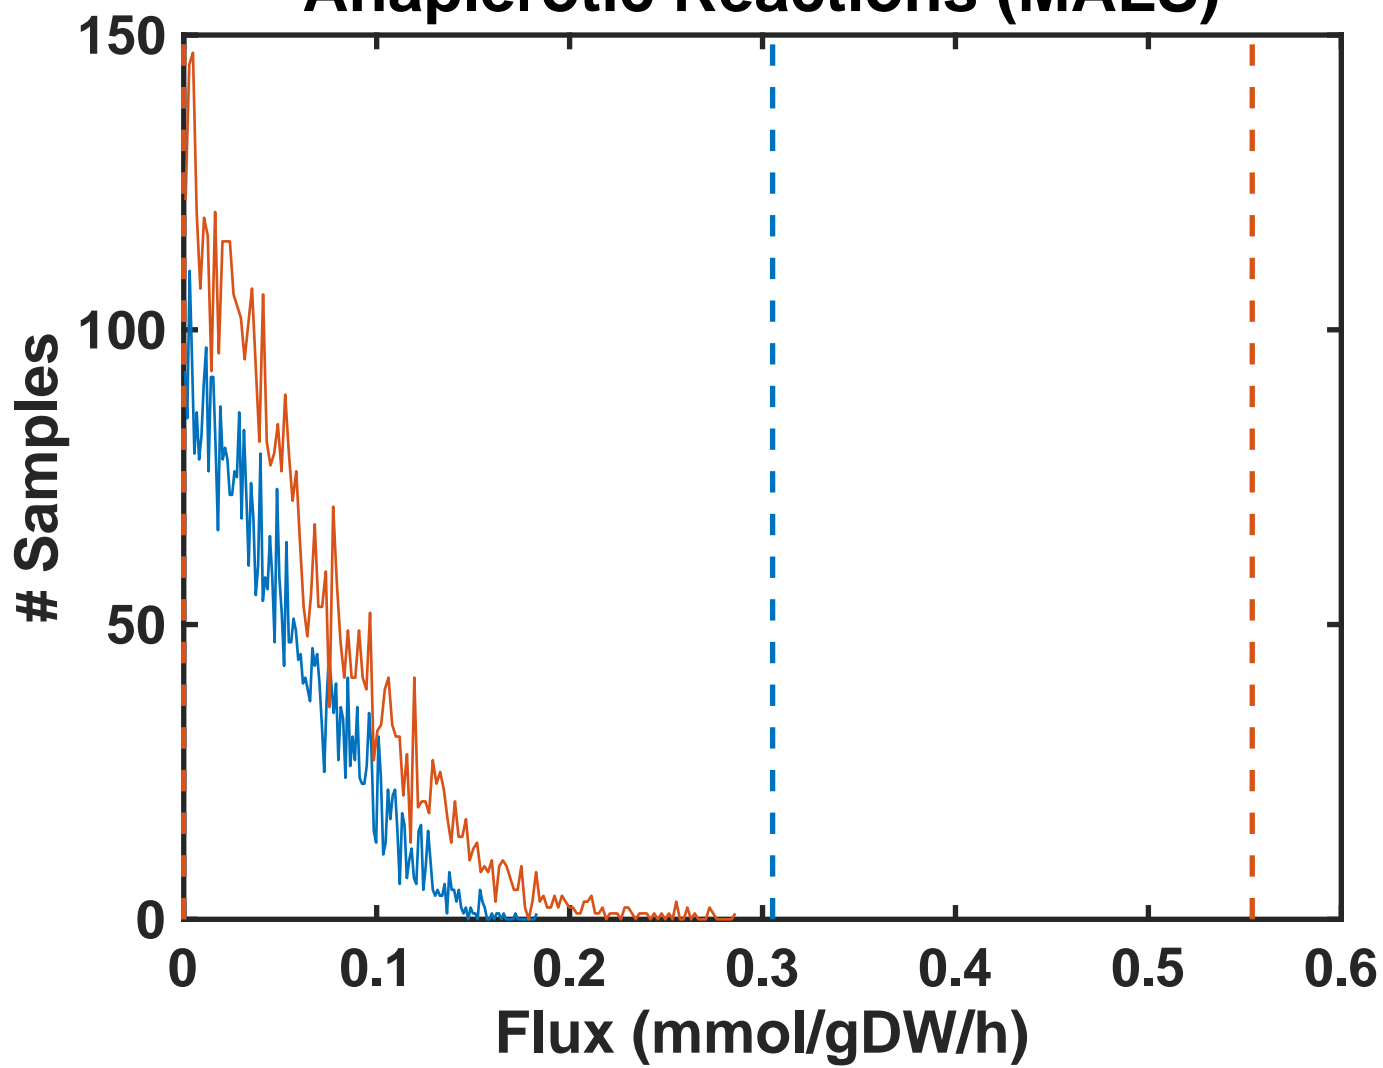

Supplement: s1 [file s1]

## Glycolysis/Gluconeogenesis (PFK)

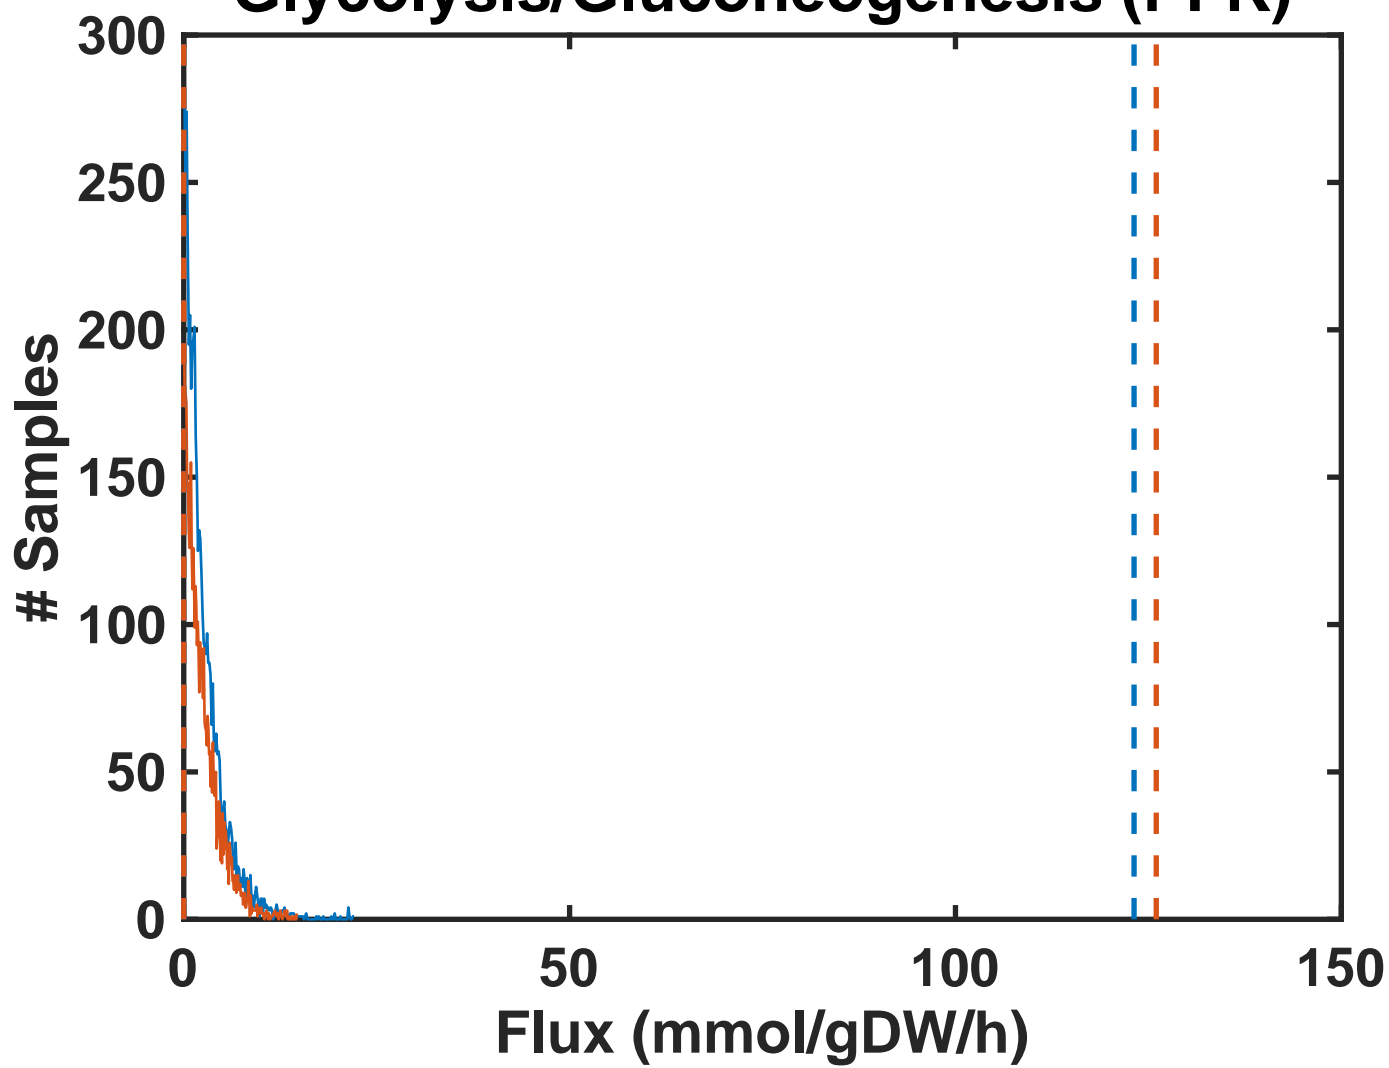

Supplement: s1 [file s1]

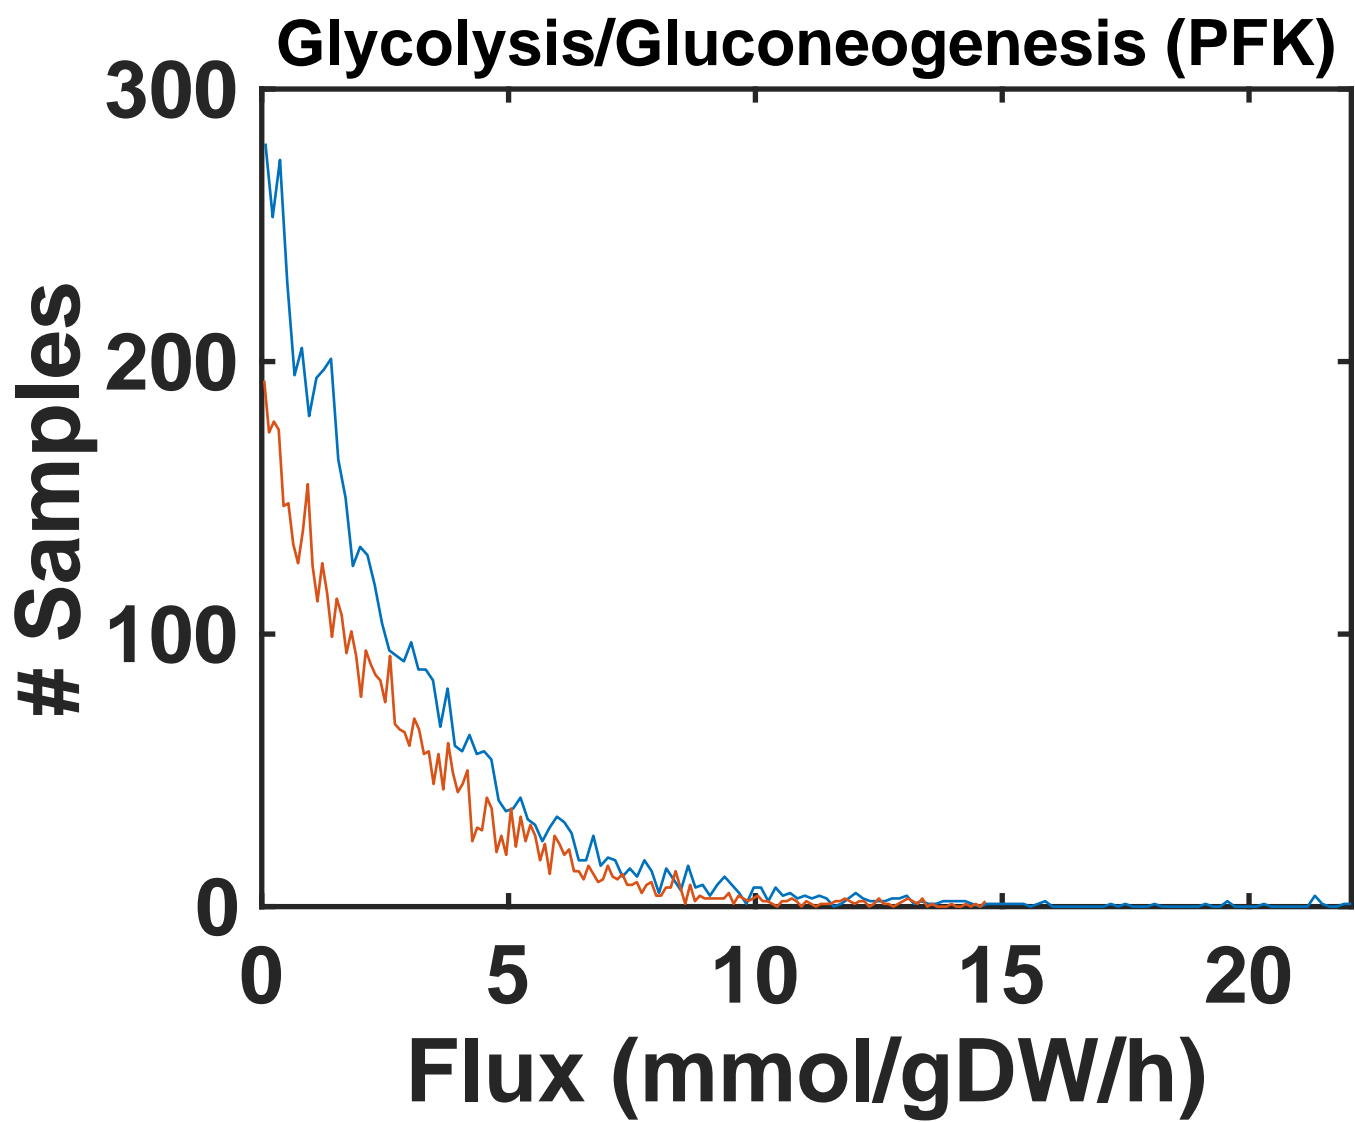

Supplement: s1 [file s1]

## Pentose Phosphate Pathway (PGL)

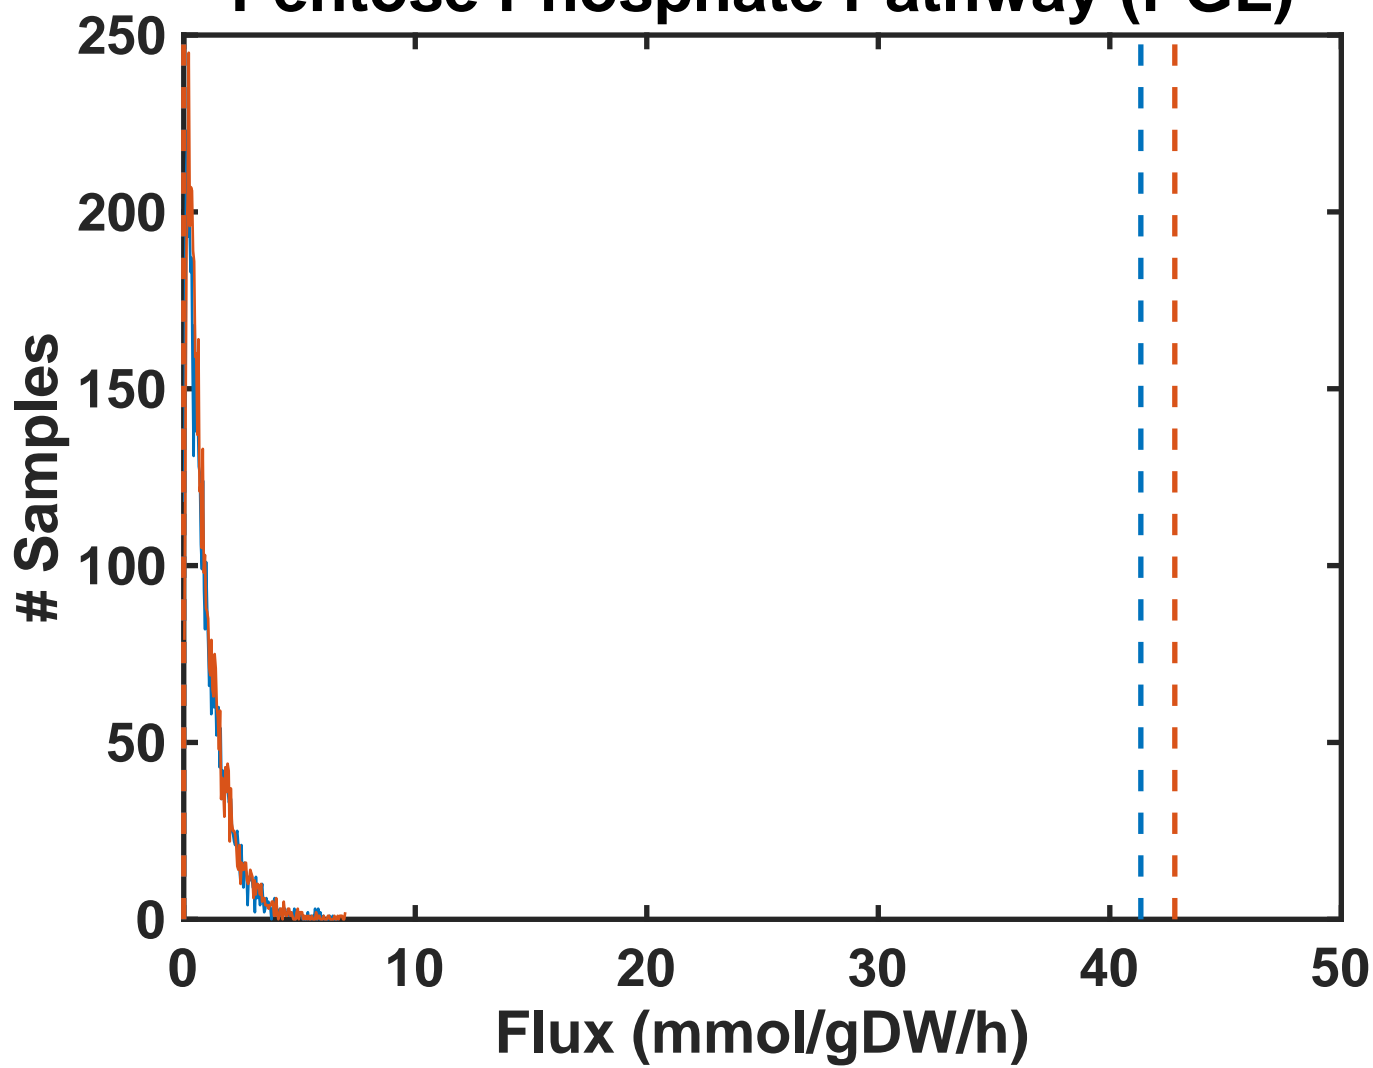

Supplement: s1 [file s1]

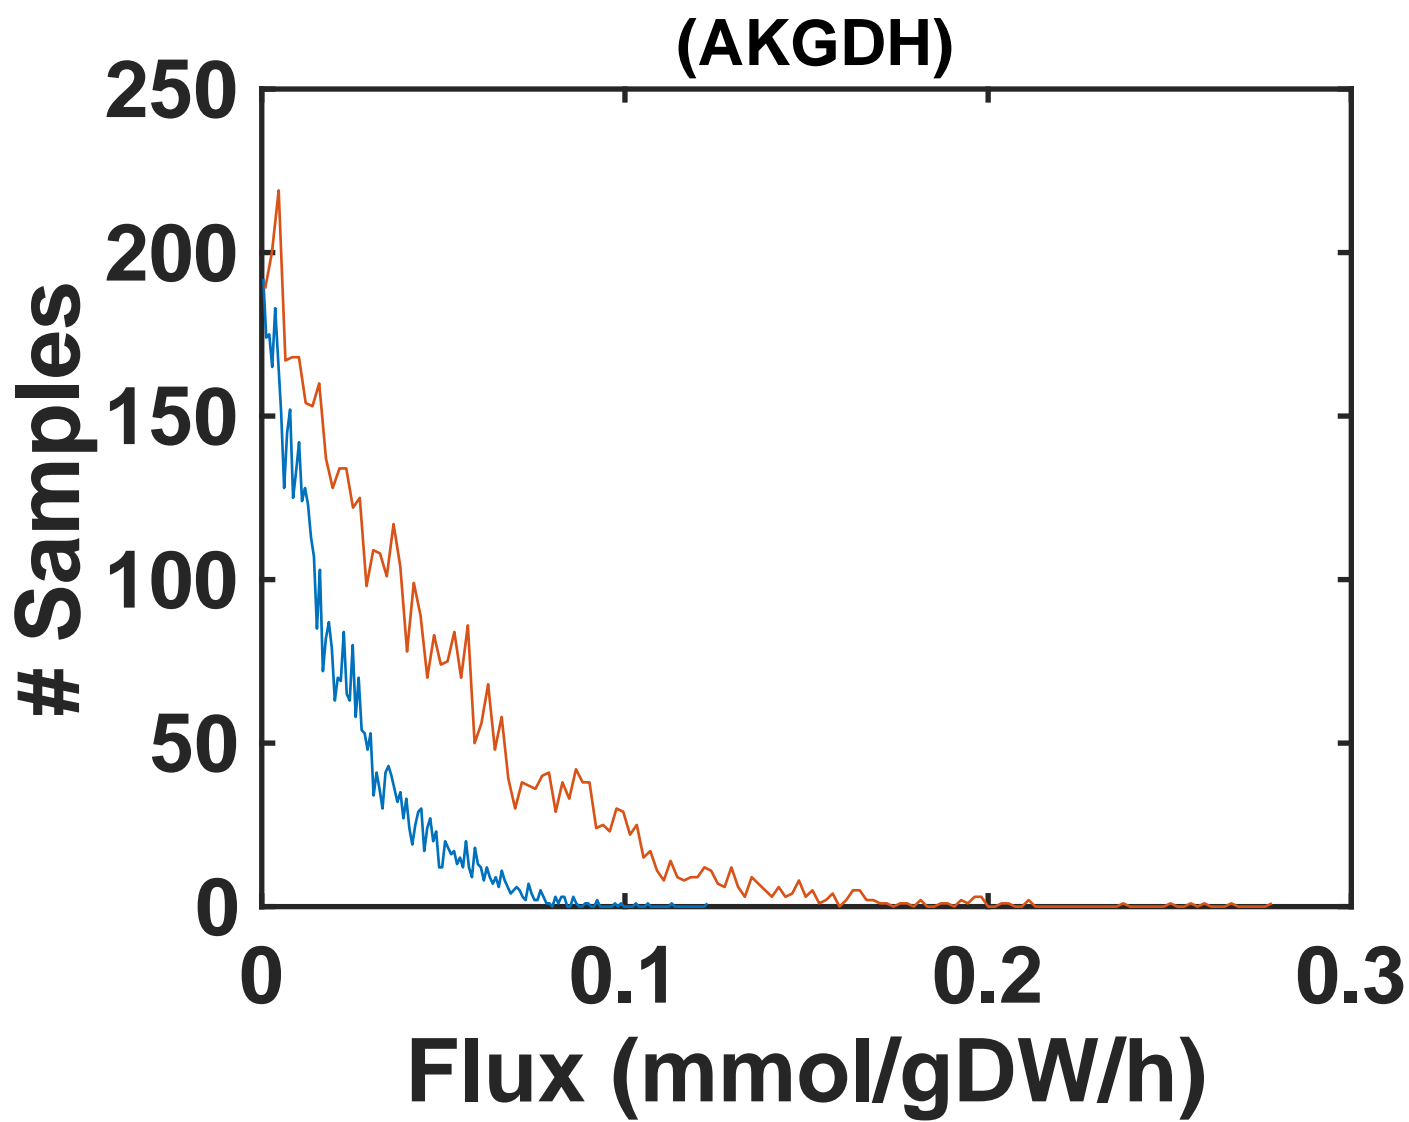

Supplement: s1 [file s1]

# Exchange ( $EX_g lyc_e$ )

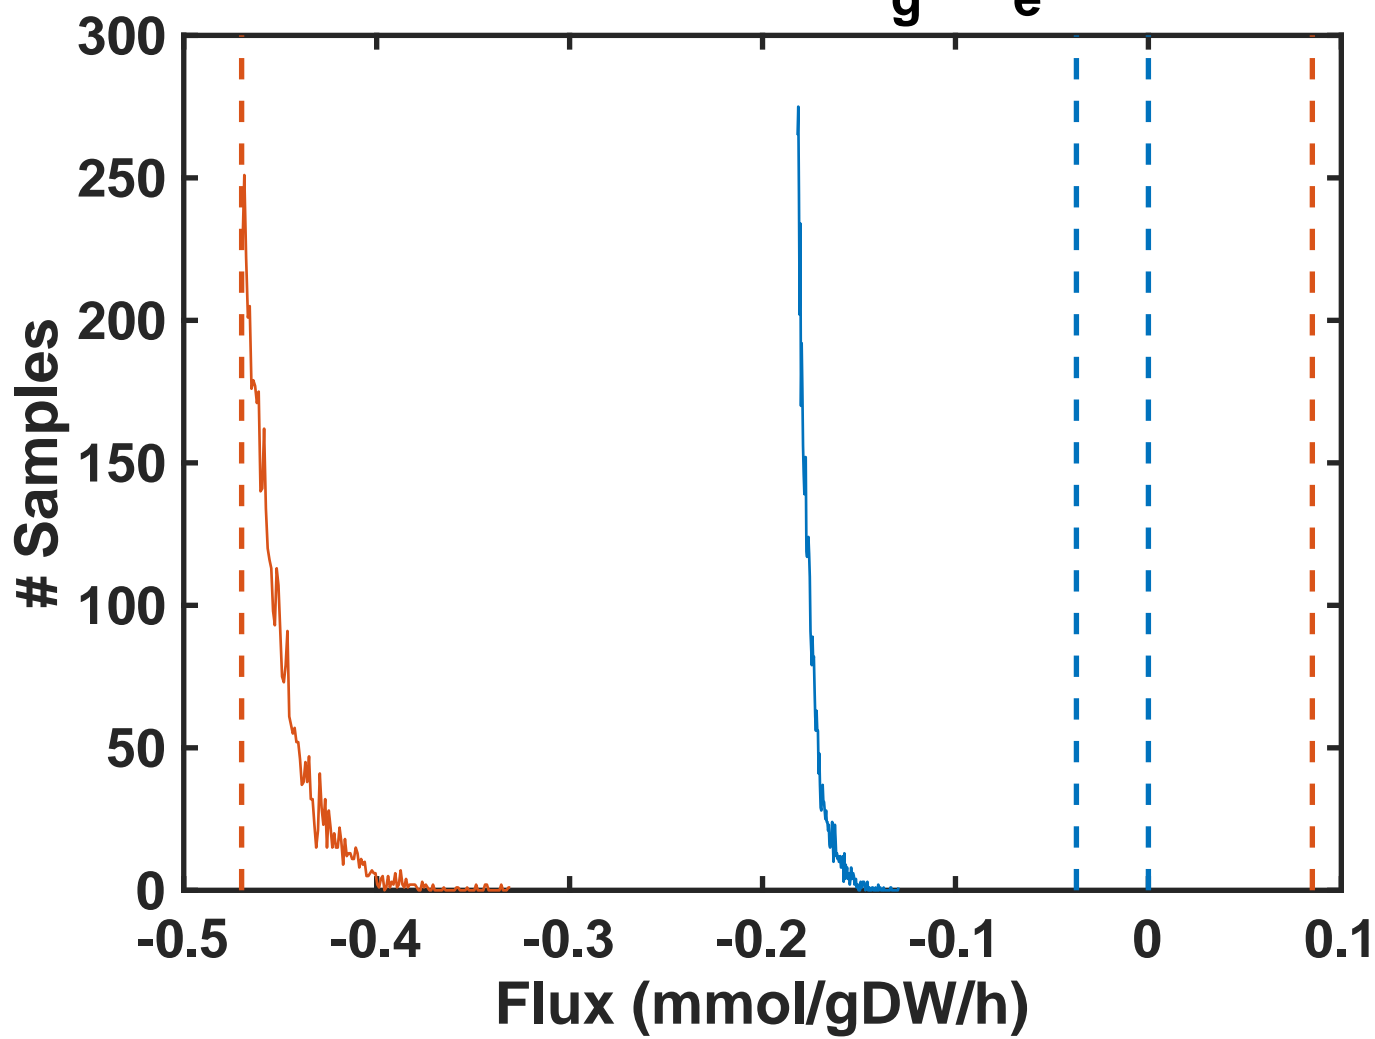

Supplement: s1 [file s1]

## Anaplerotic Reactions (MALS)

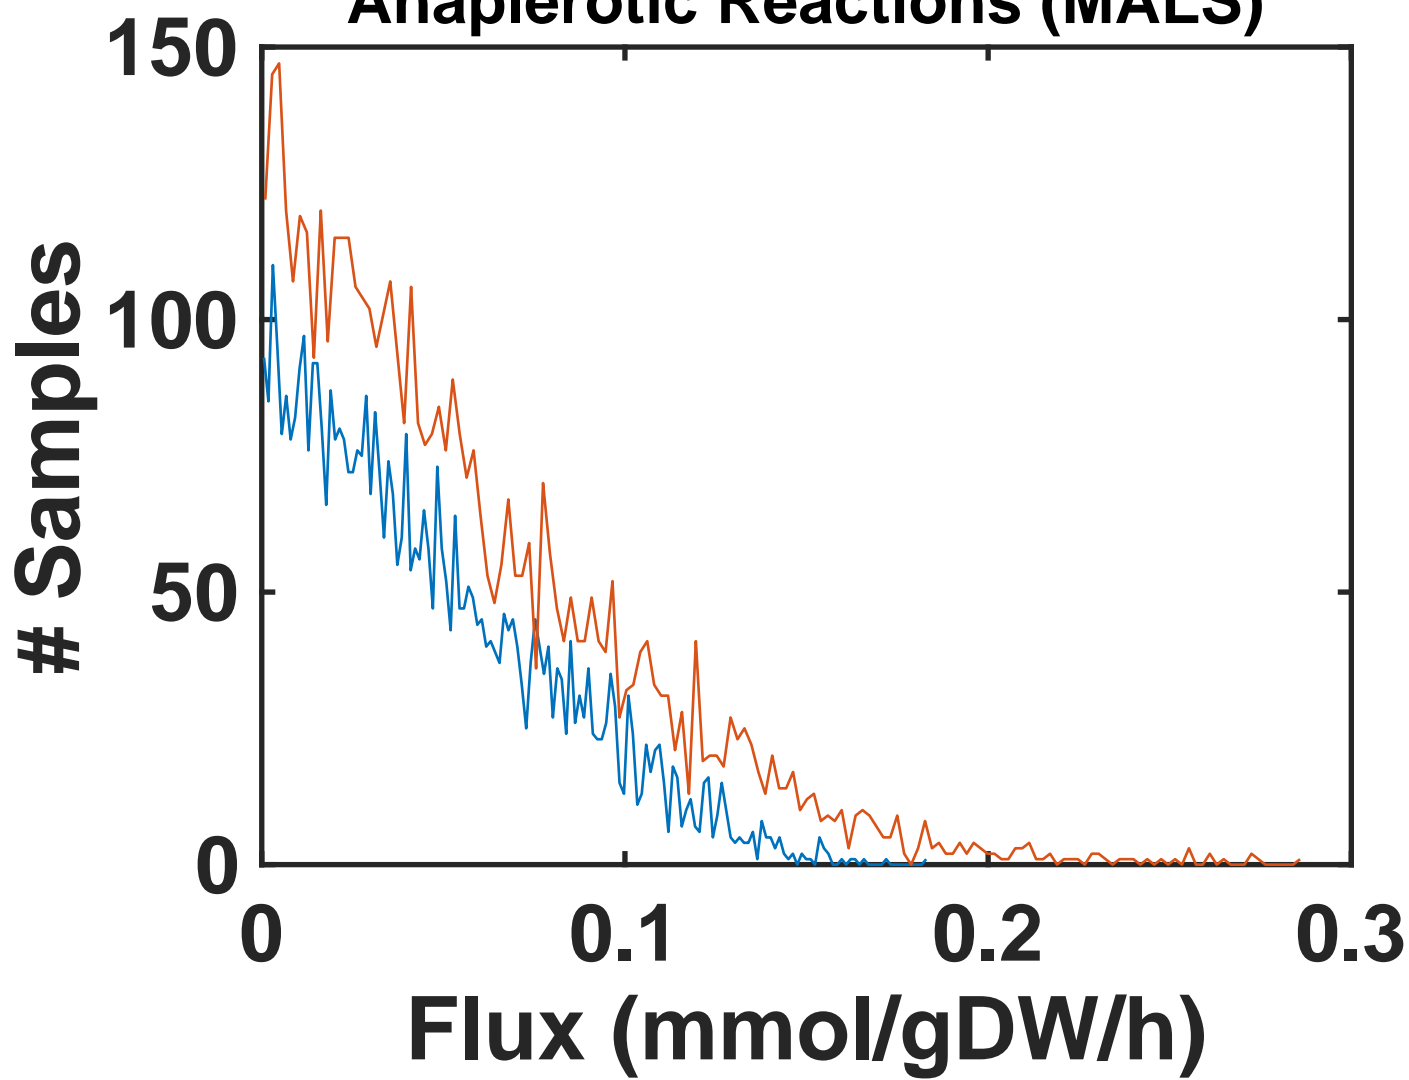

Supplement: s1 [file s1]

## Anaplerotic Reactions (PPC)

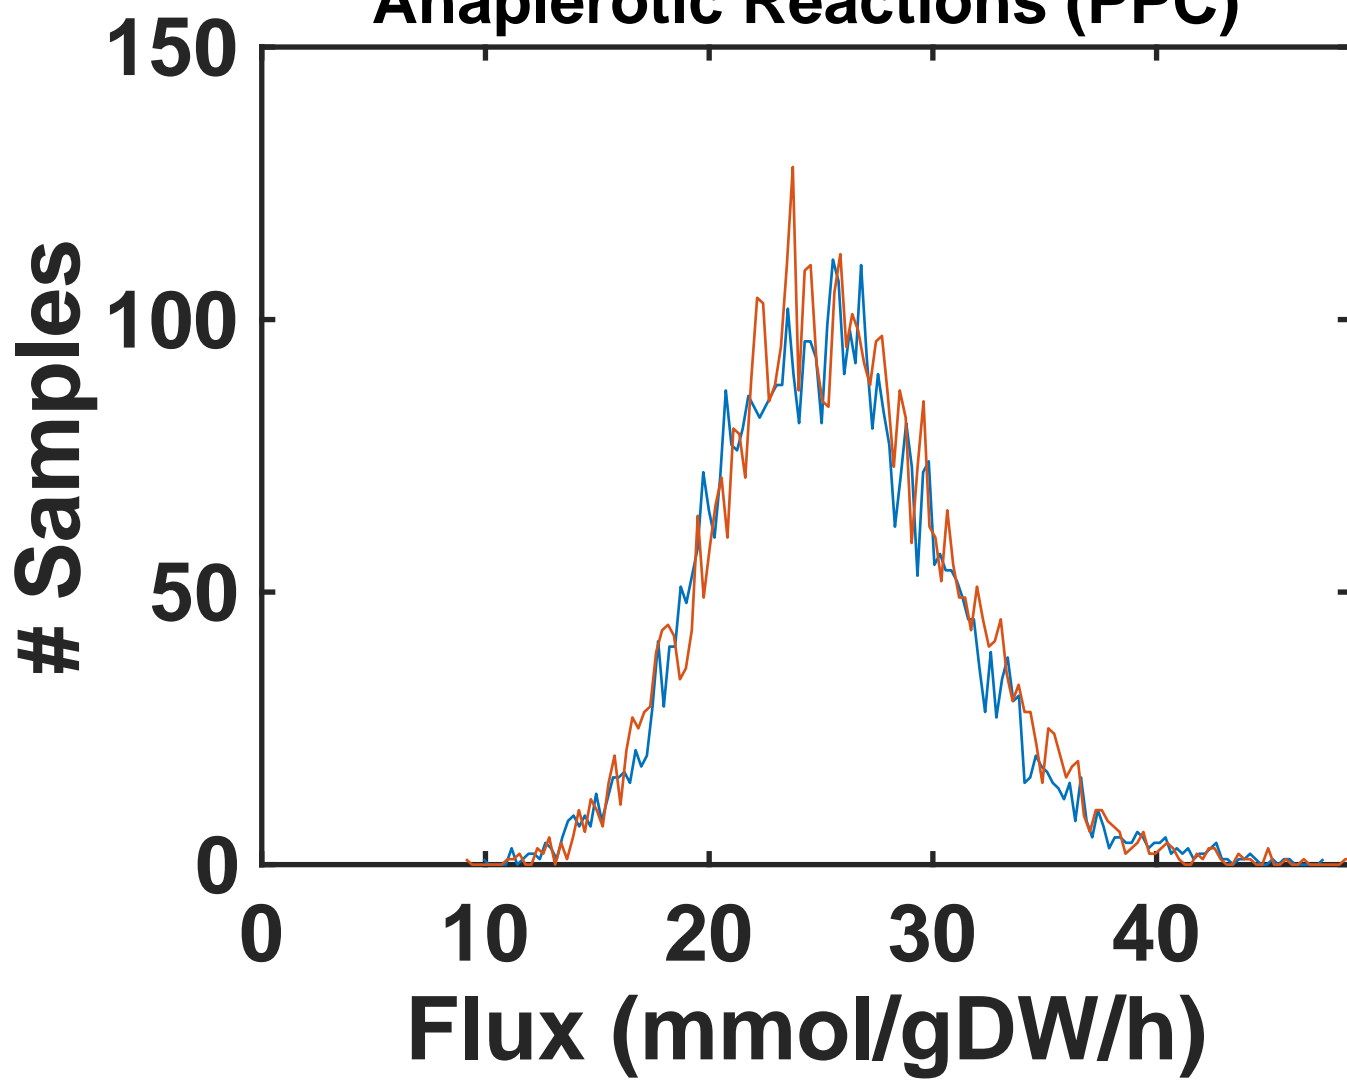

Supplement: s1 [file s1]

## Anaplerotic Reactions (PPCK)

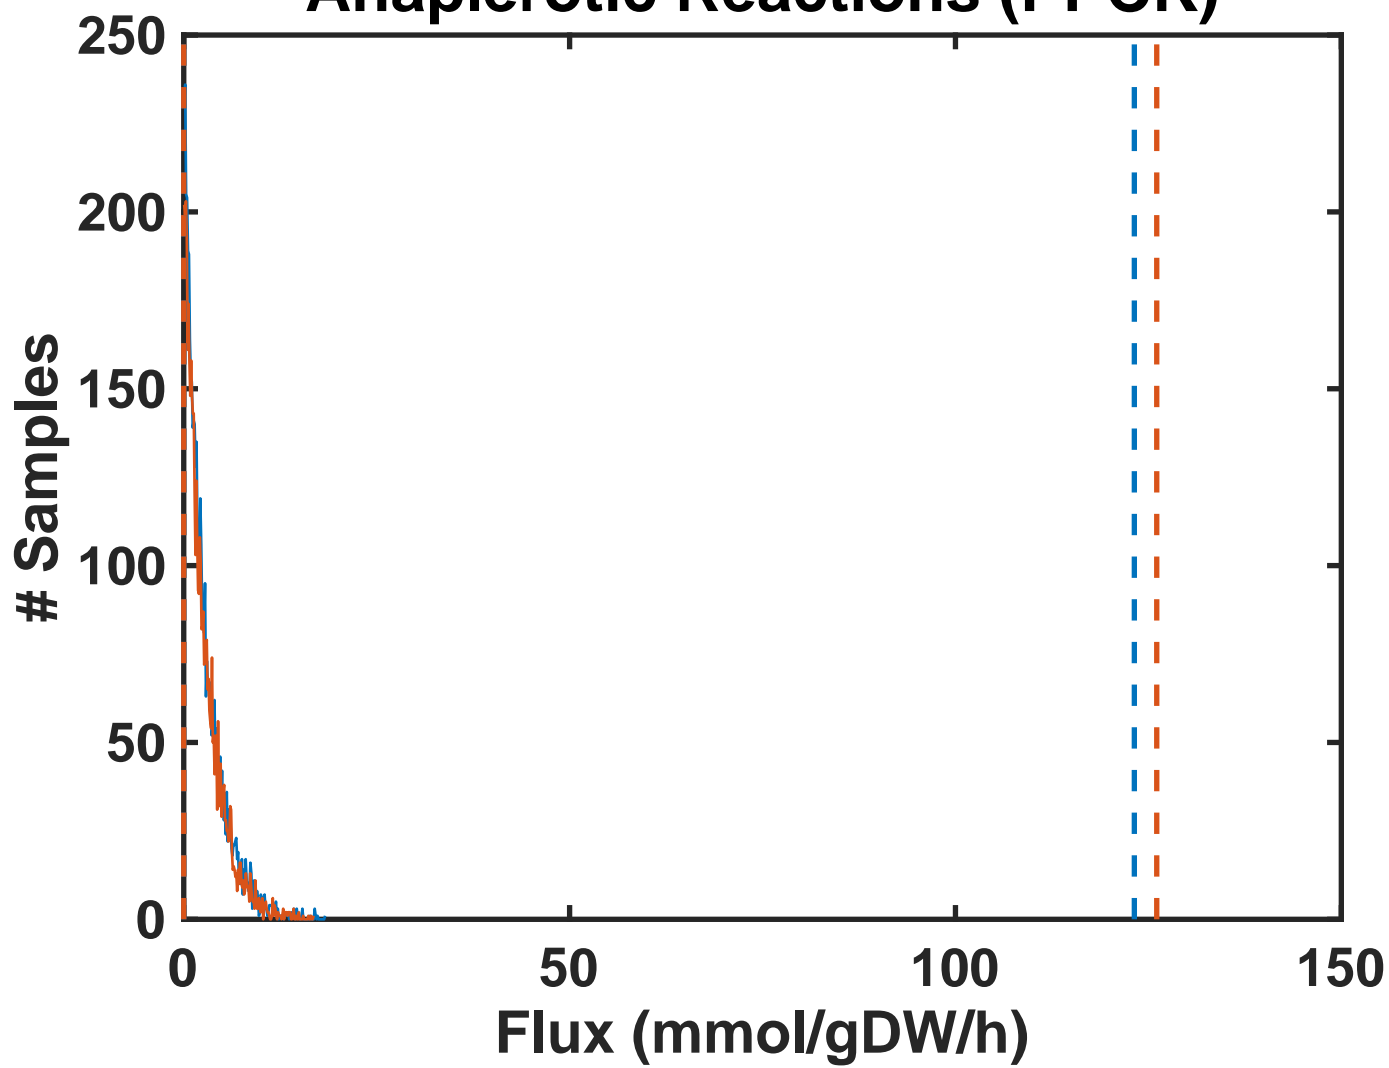

Supplement: s1 [file s1]

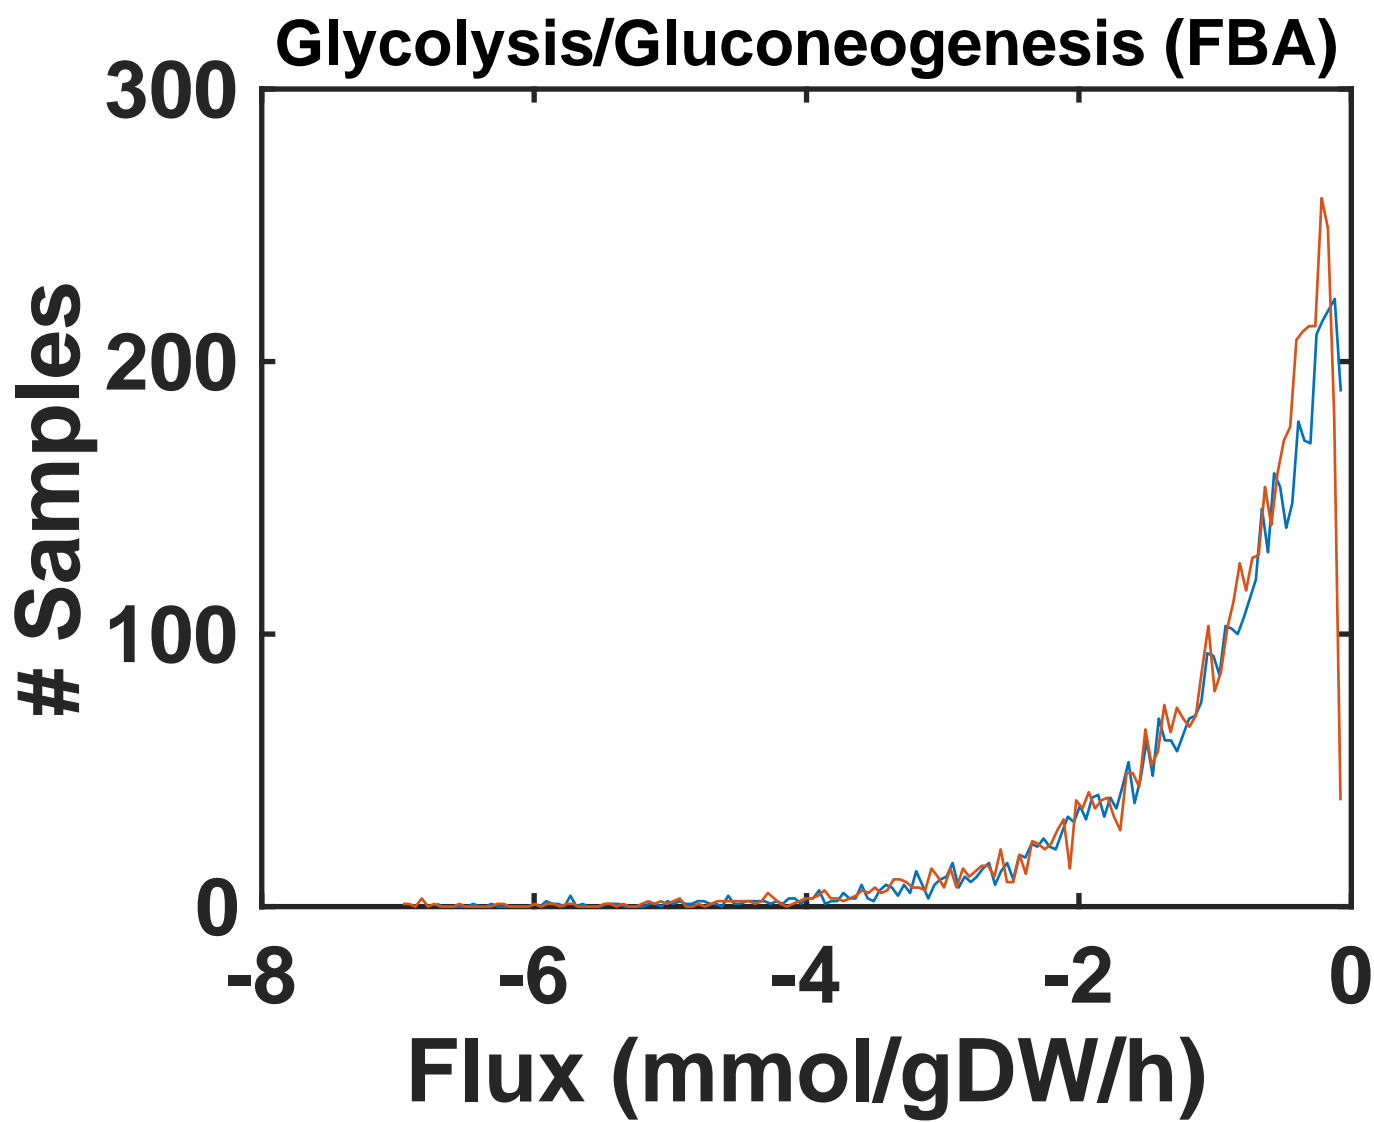

Supplement: s1 [file s1]

(LMPD<sub>1</sub>16<sub>g</sub>In-L<sub>c</sub>)

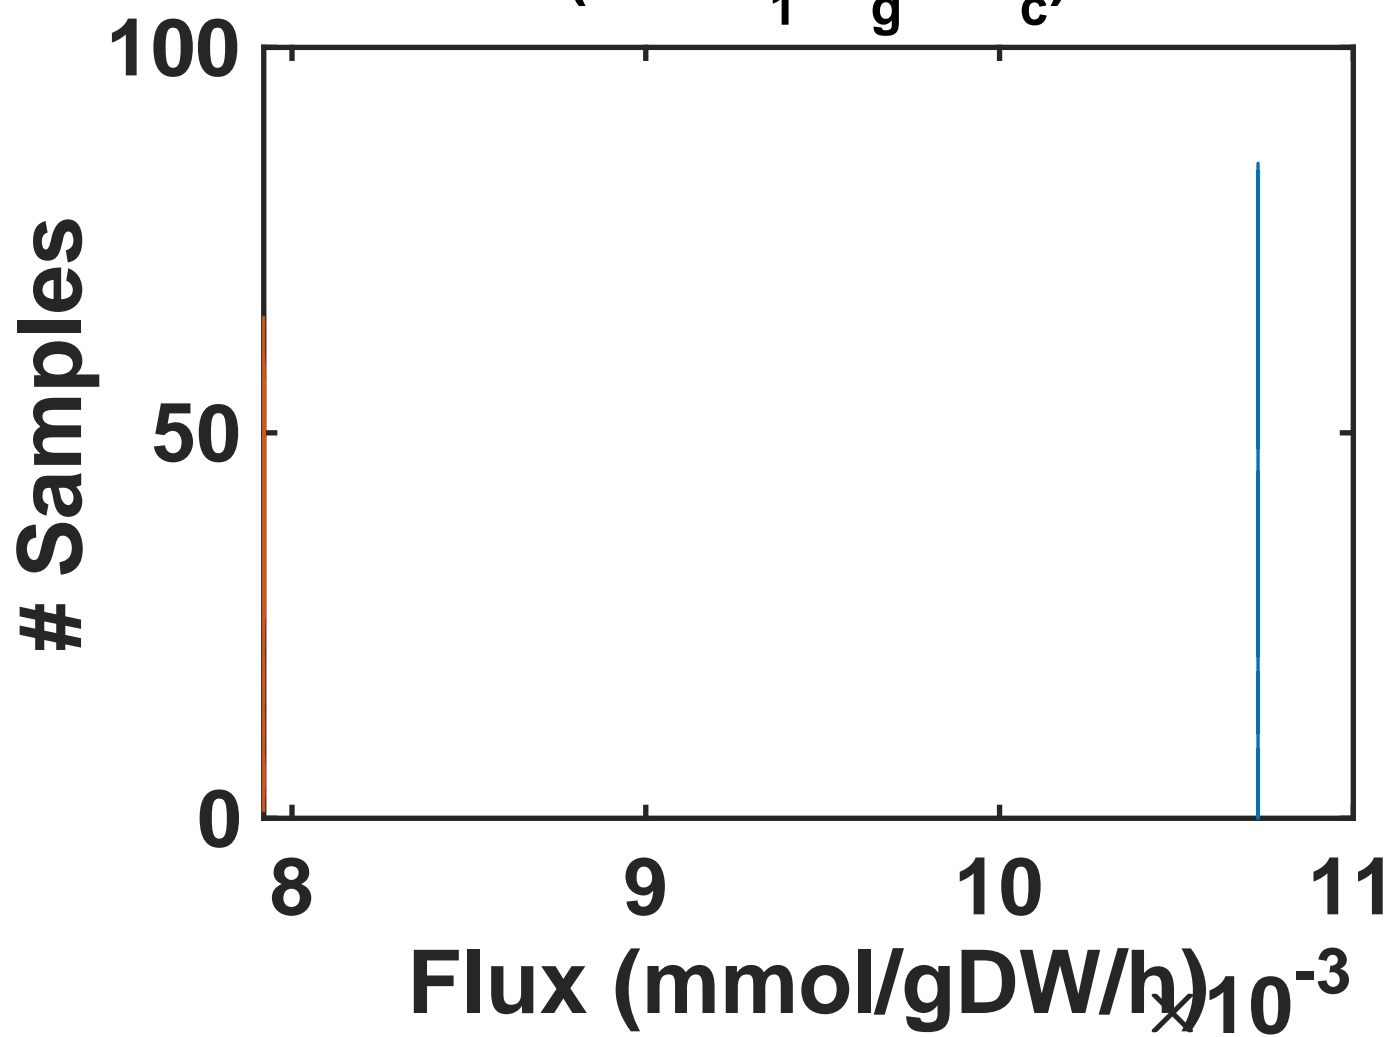

Supplement: s1 [file s1]

# Exchange ( $EX_o 2_e$ )

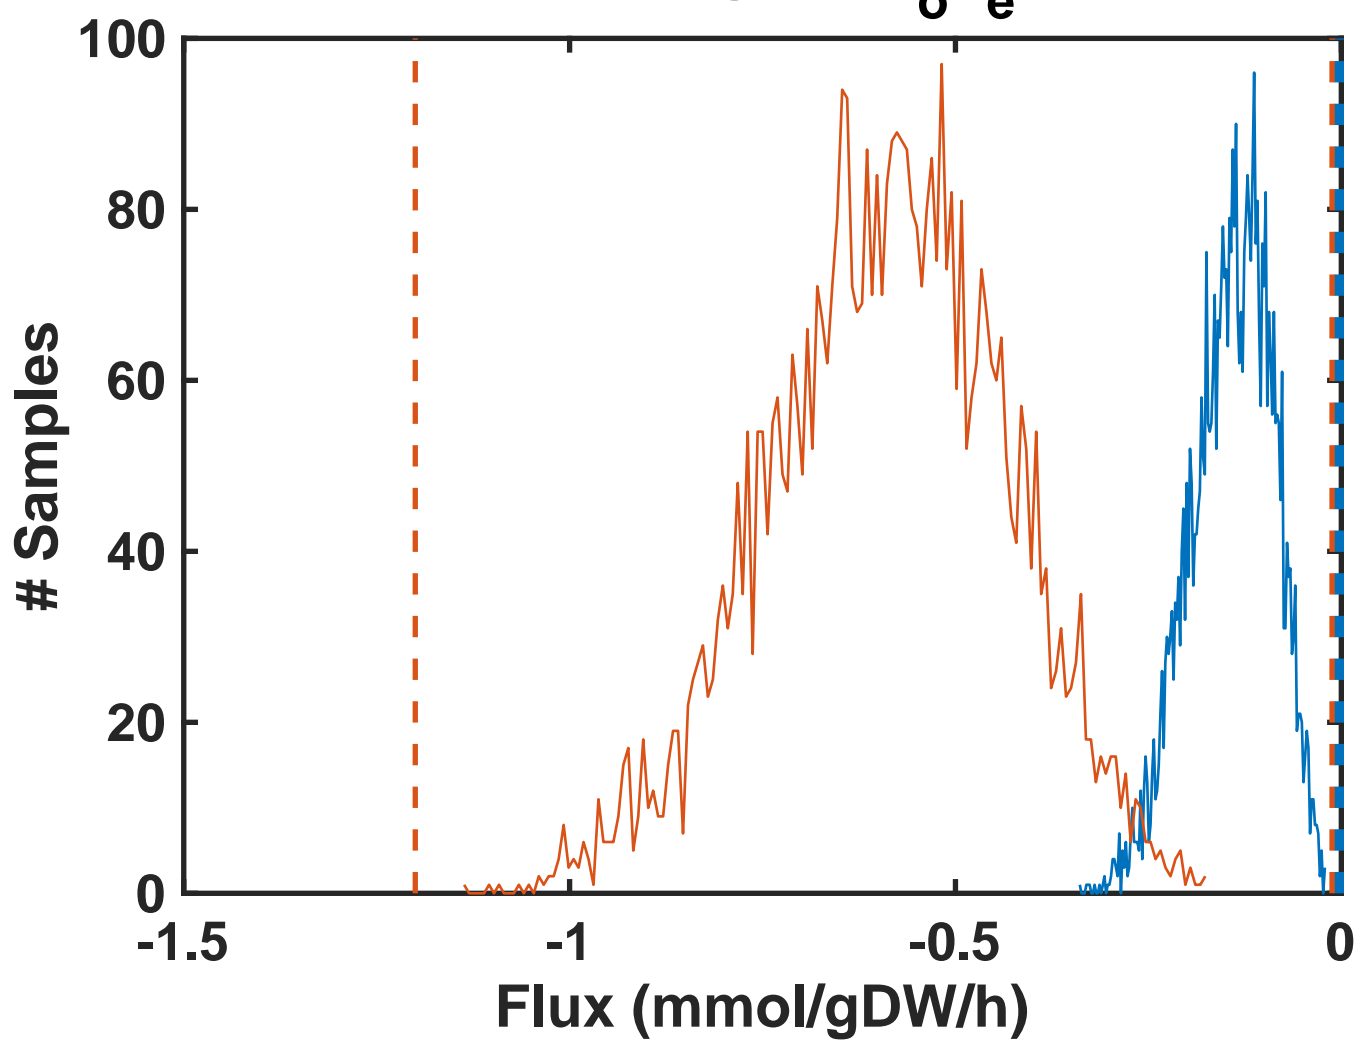

Supplement: s1 [file s1]

## Glycolysis/Gluconeogenesis (PYK)

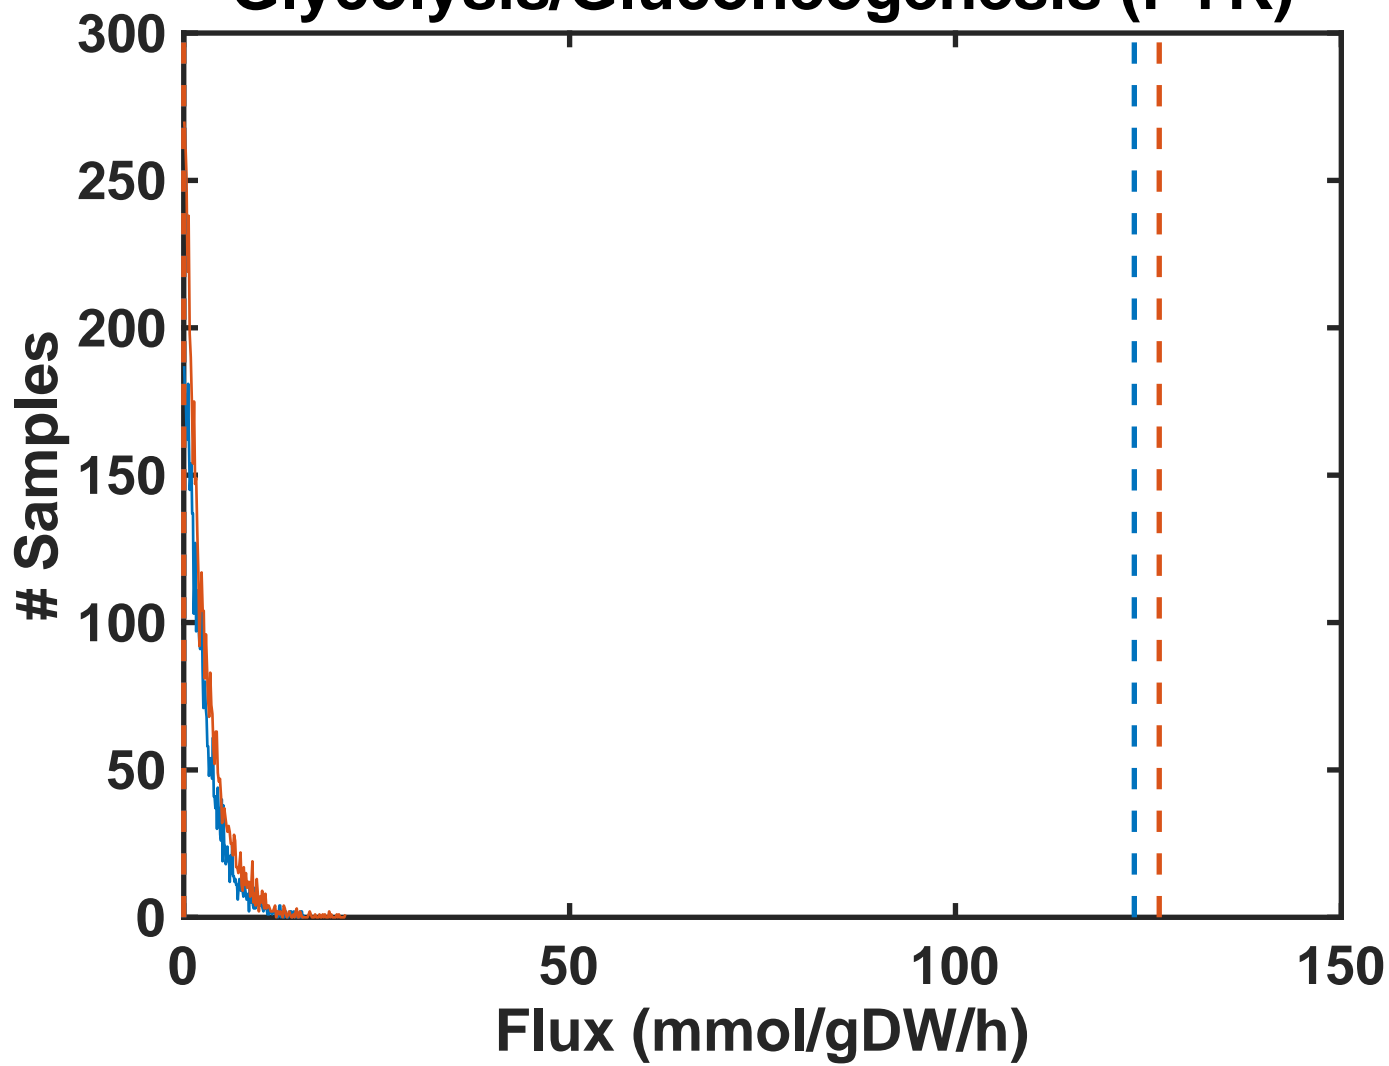

Supplement: s1 [file s1]

## Glycolysis/Gluconeogenesis (PGM)

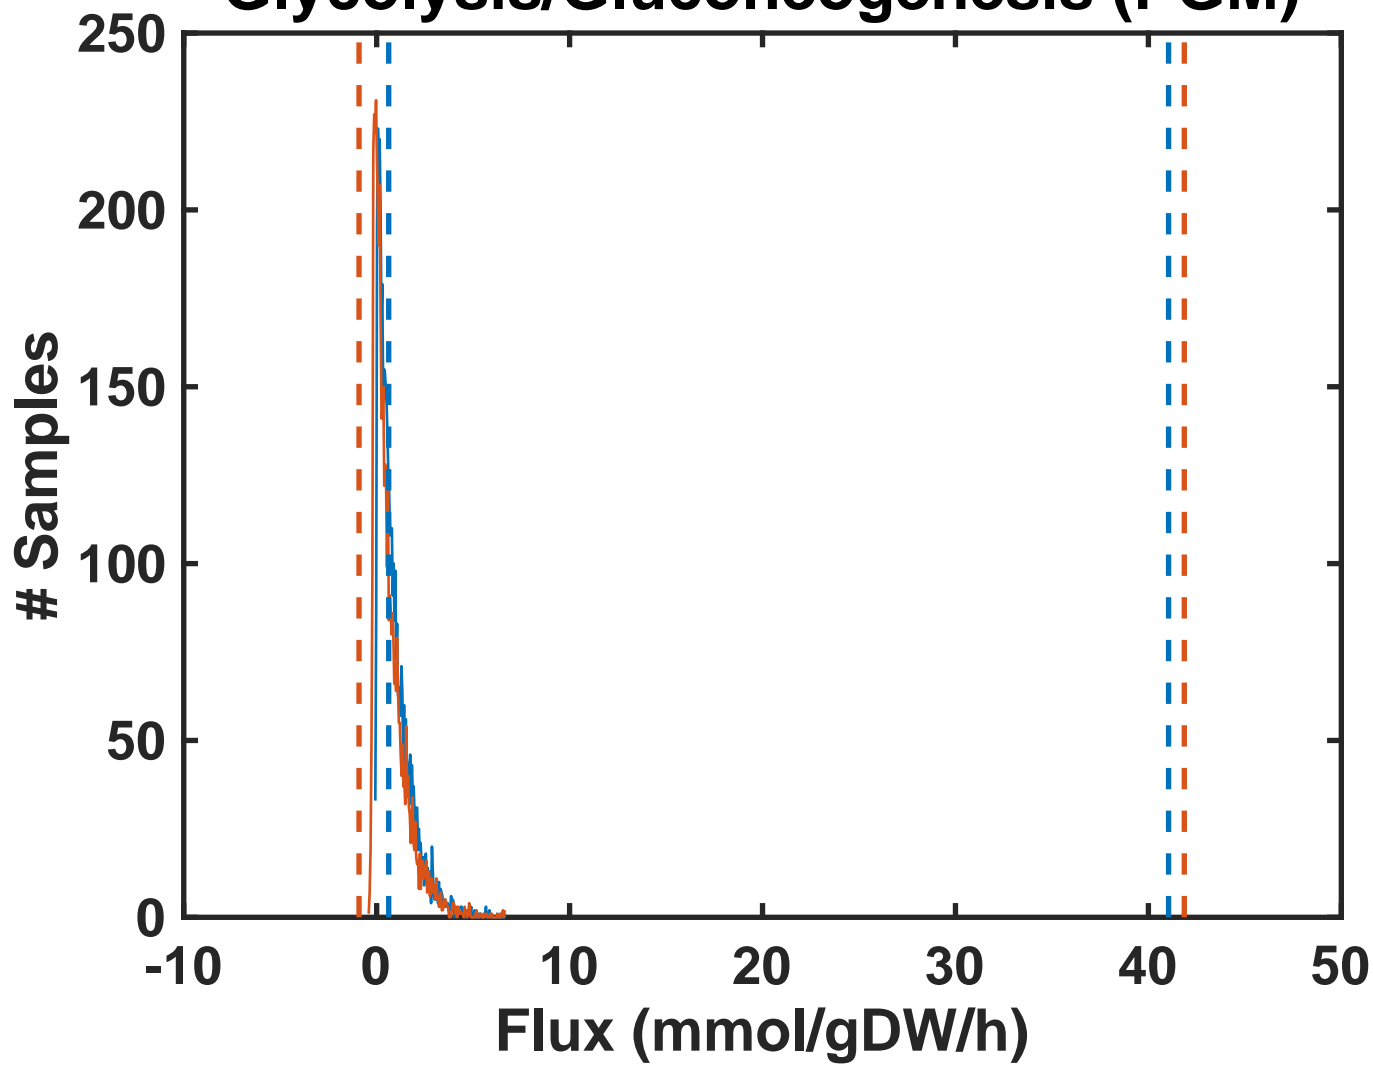

Supplement: s1 [file s1]

# Oxidative Phosphorylation (ATPS4rpp)

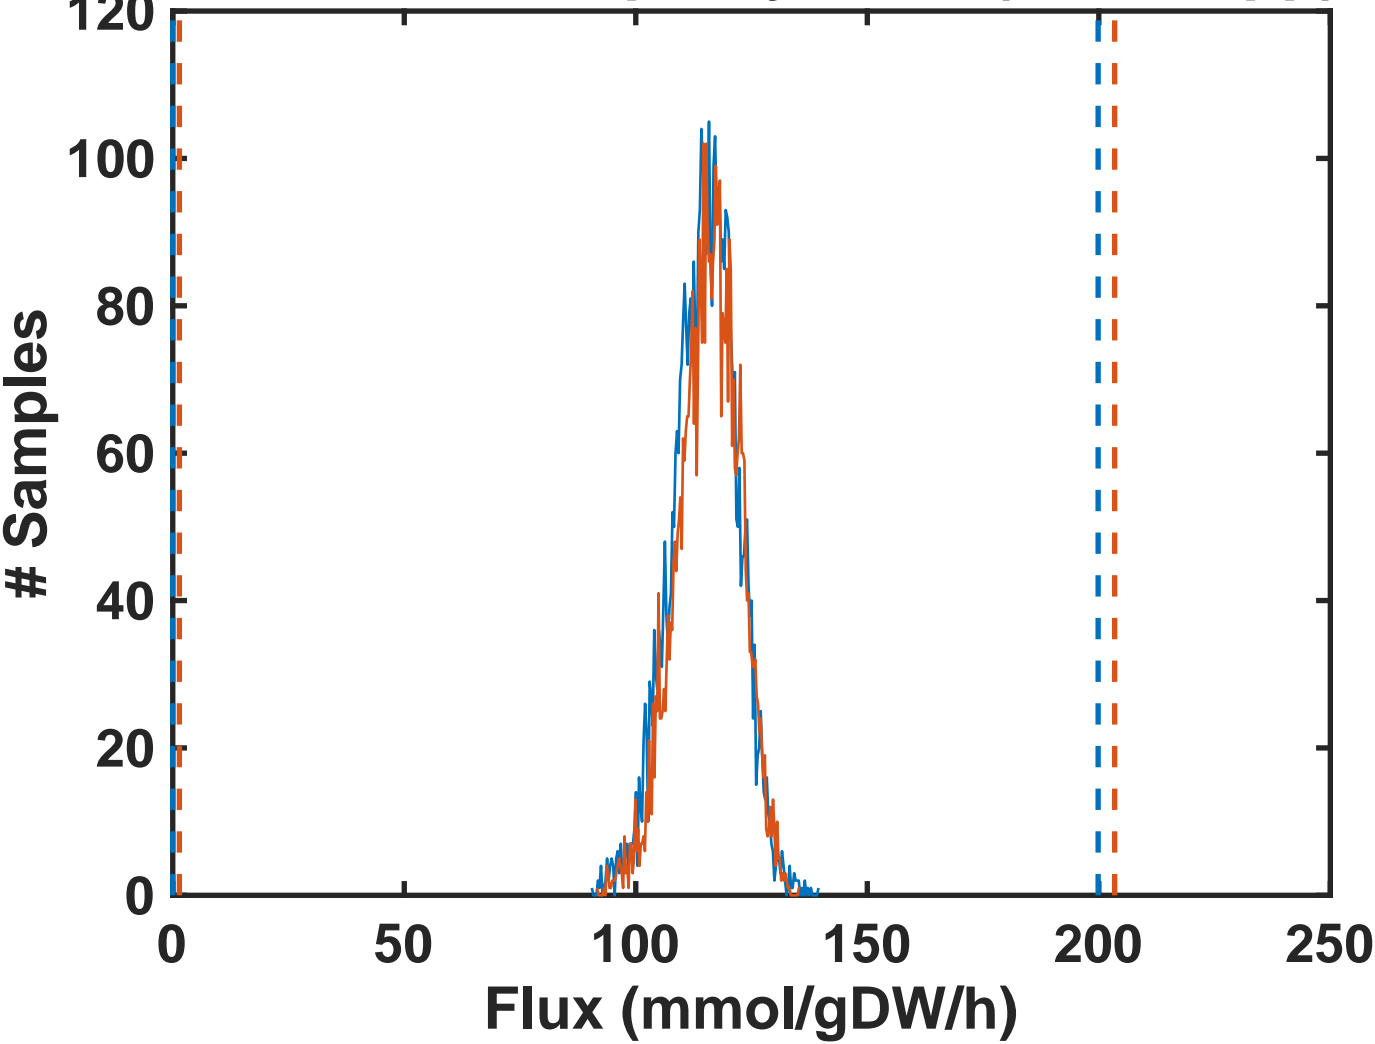

Supplement: s1 [file s1]

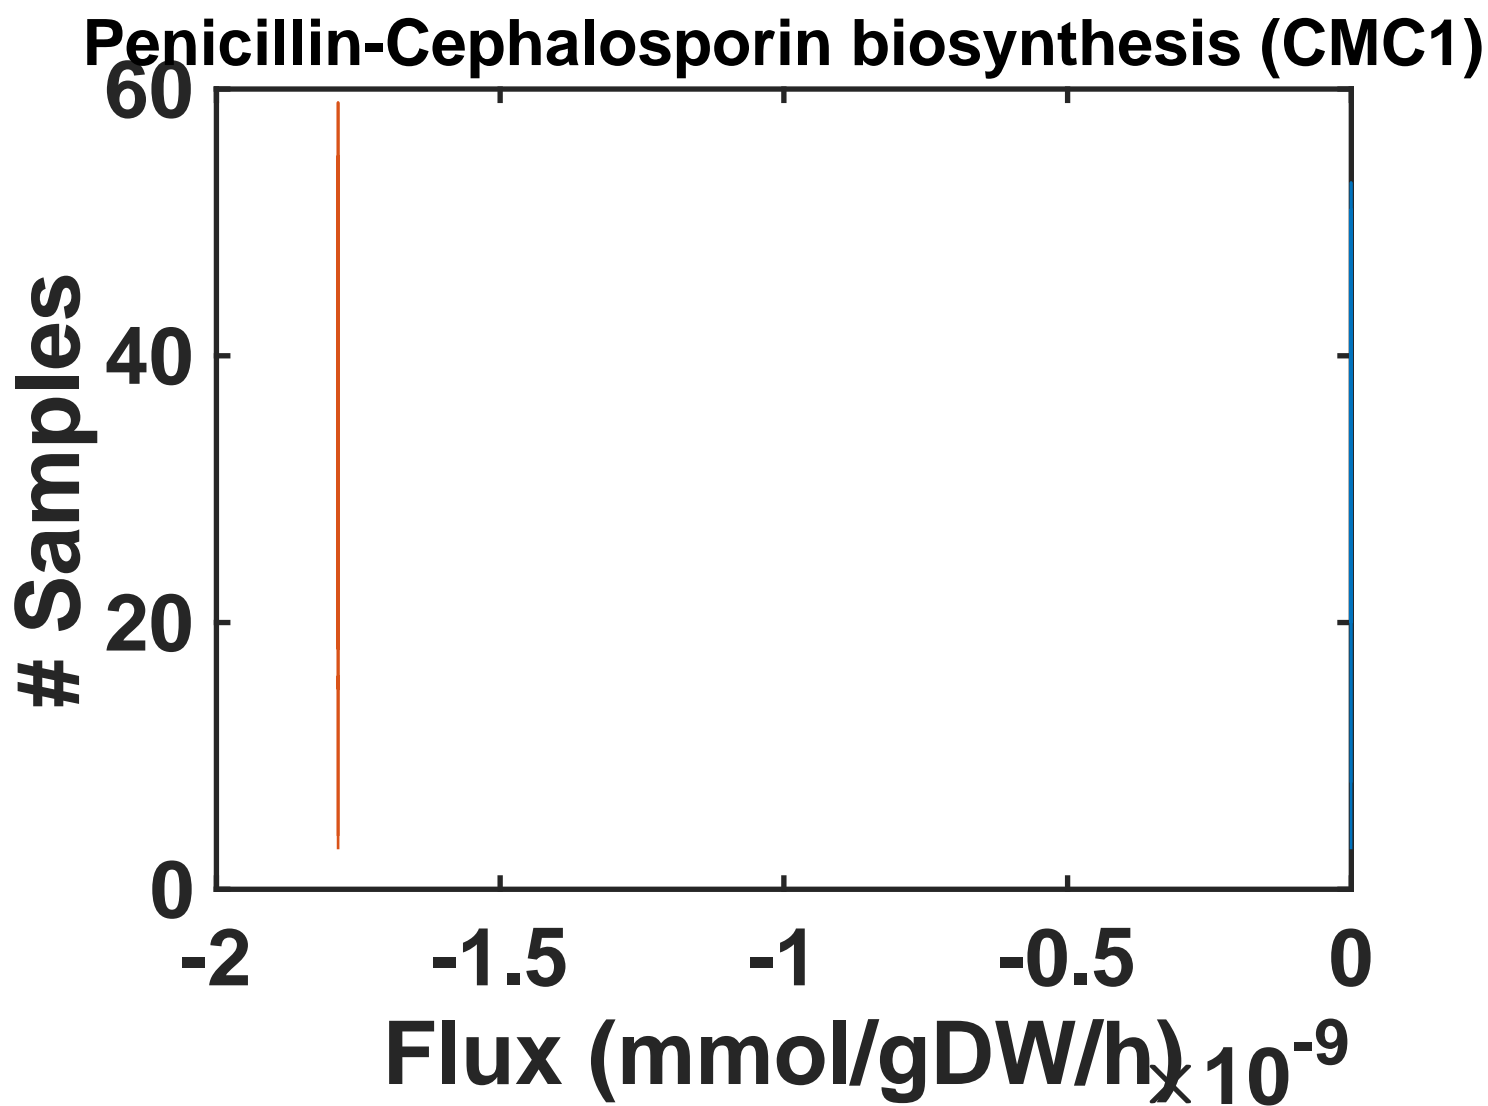

Supplement: s1 [file s1]

## Citric Acid Cycle (FUM)

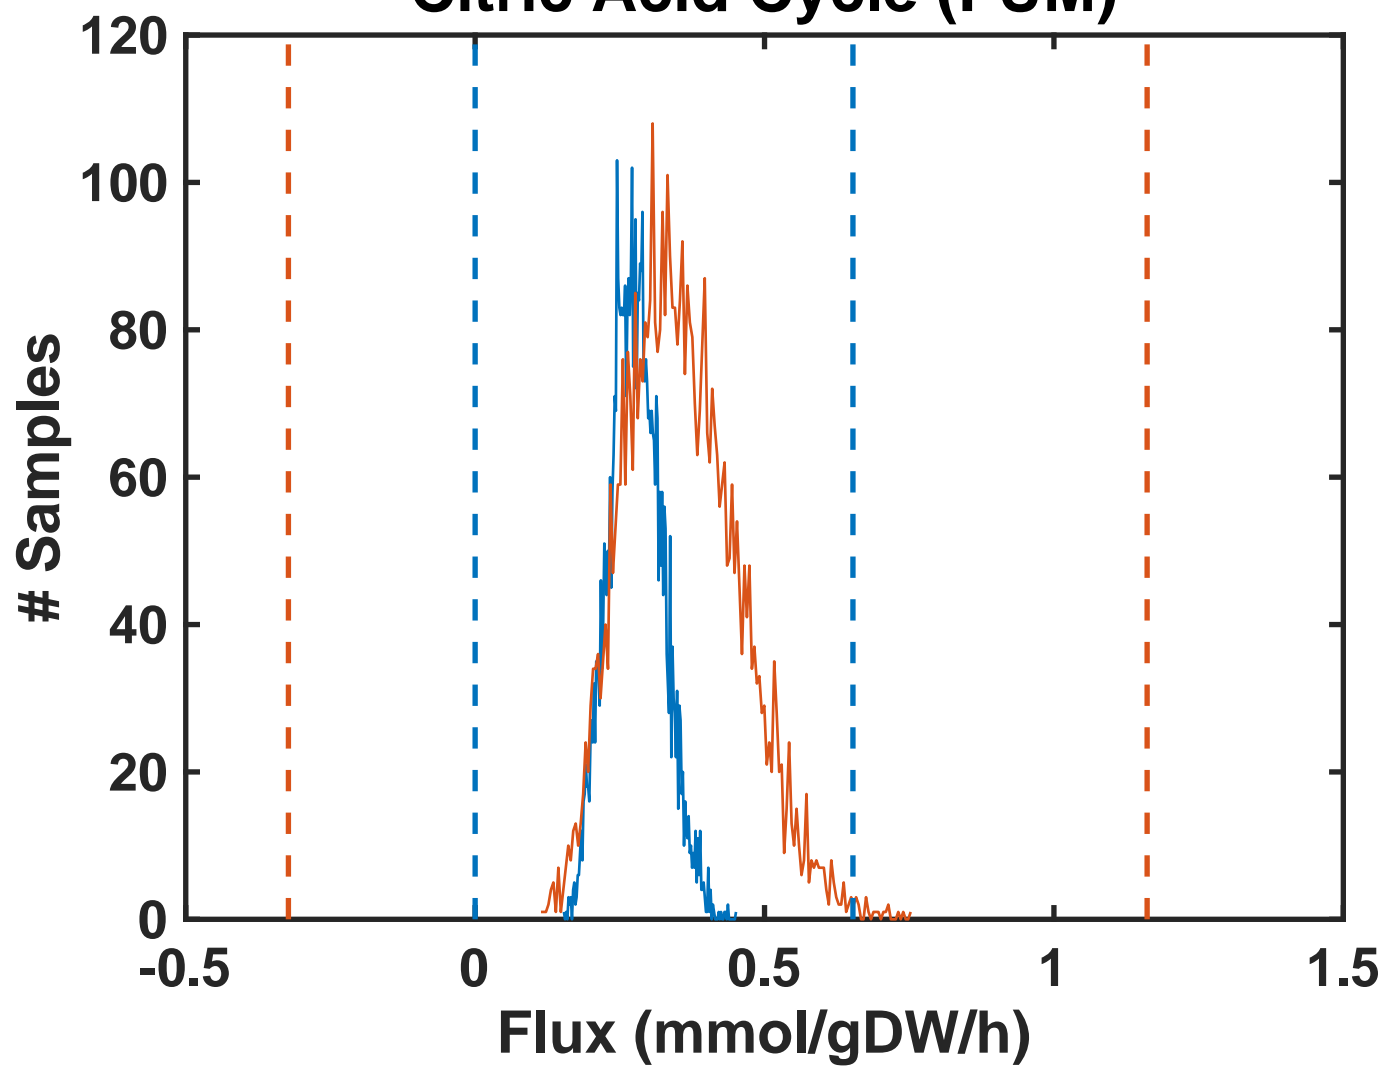

Supplement: s1 [file s1]

(LMPD<sub>3</sub>3<sub>a</sub>rg-L<sub>c</sub>)

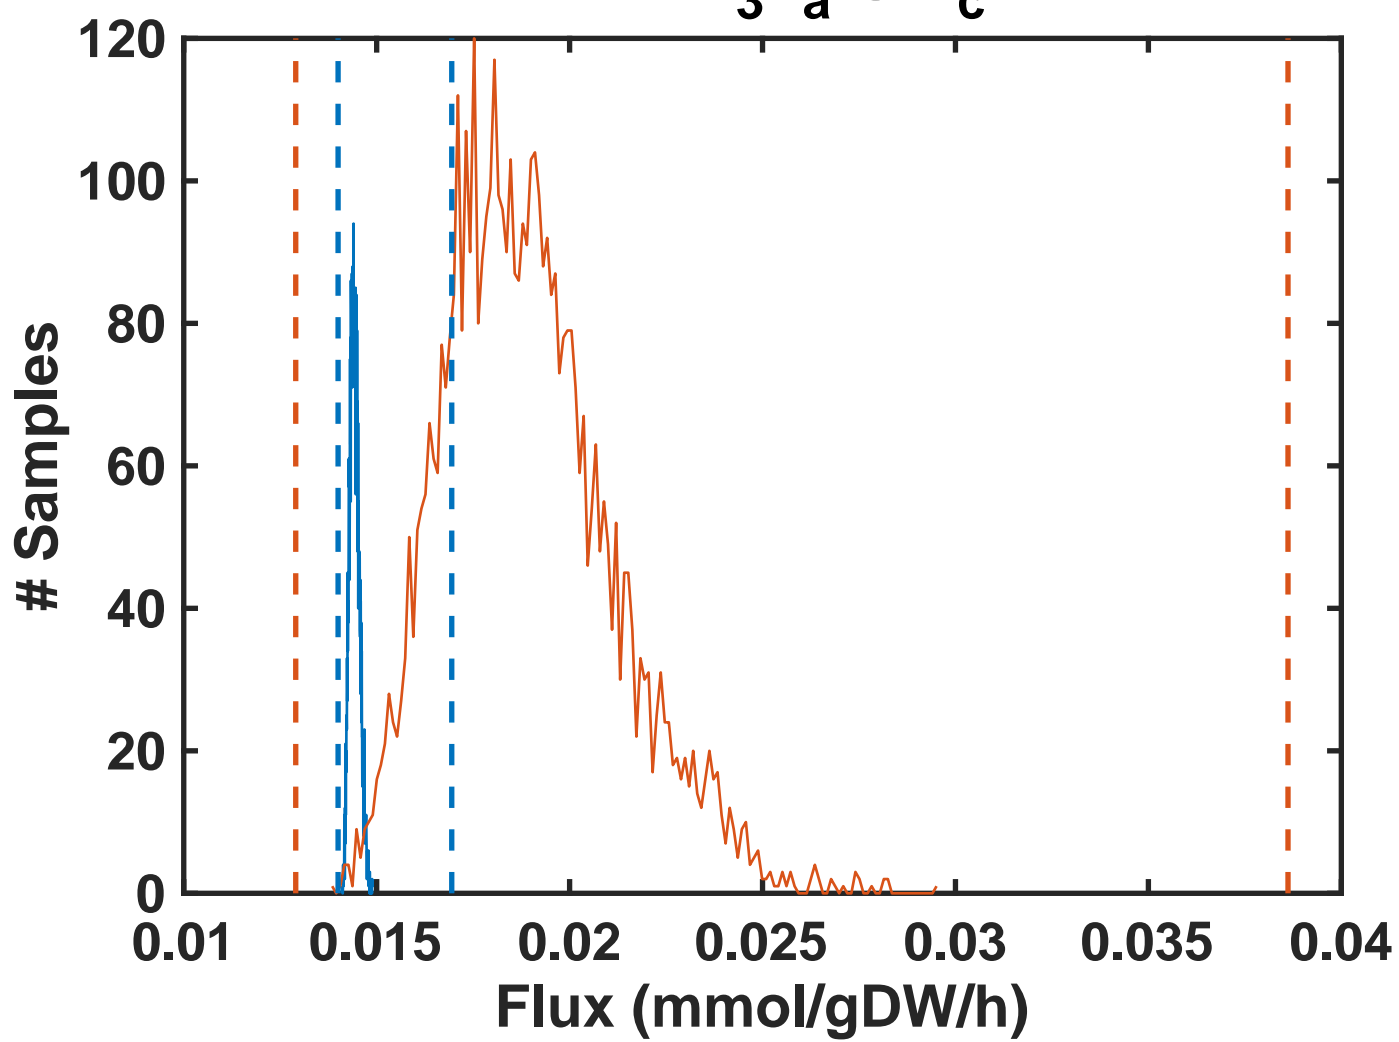

Supplement: s1 [file s1]

## Clavulanic acid biosynthesis (CEAS)

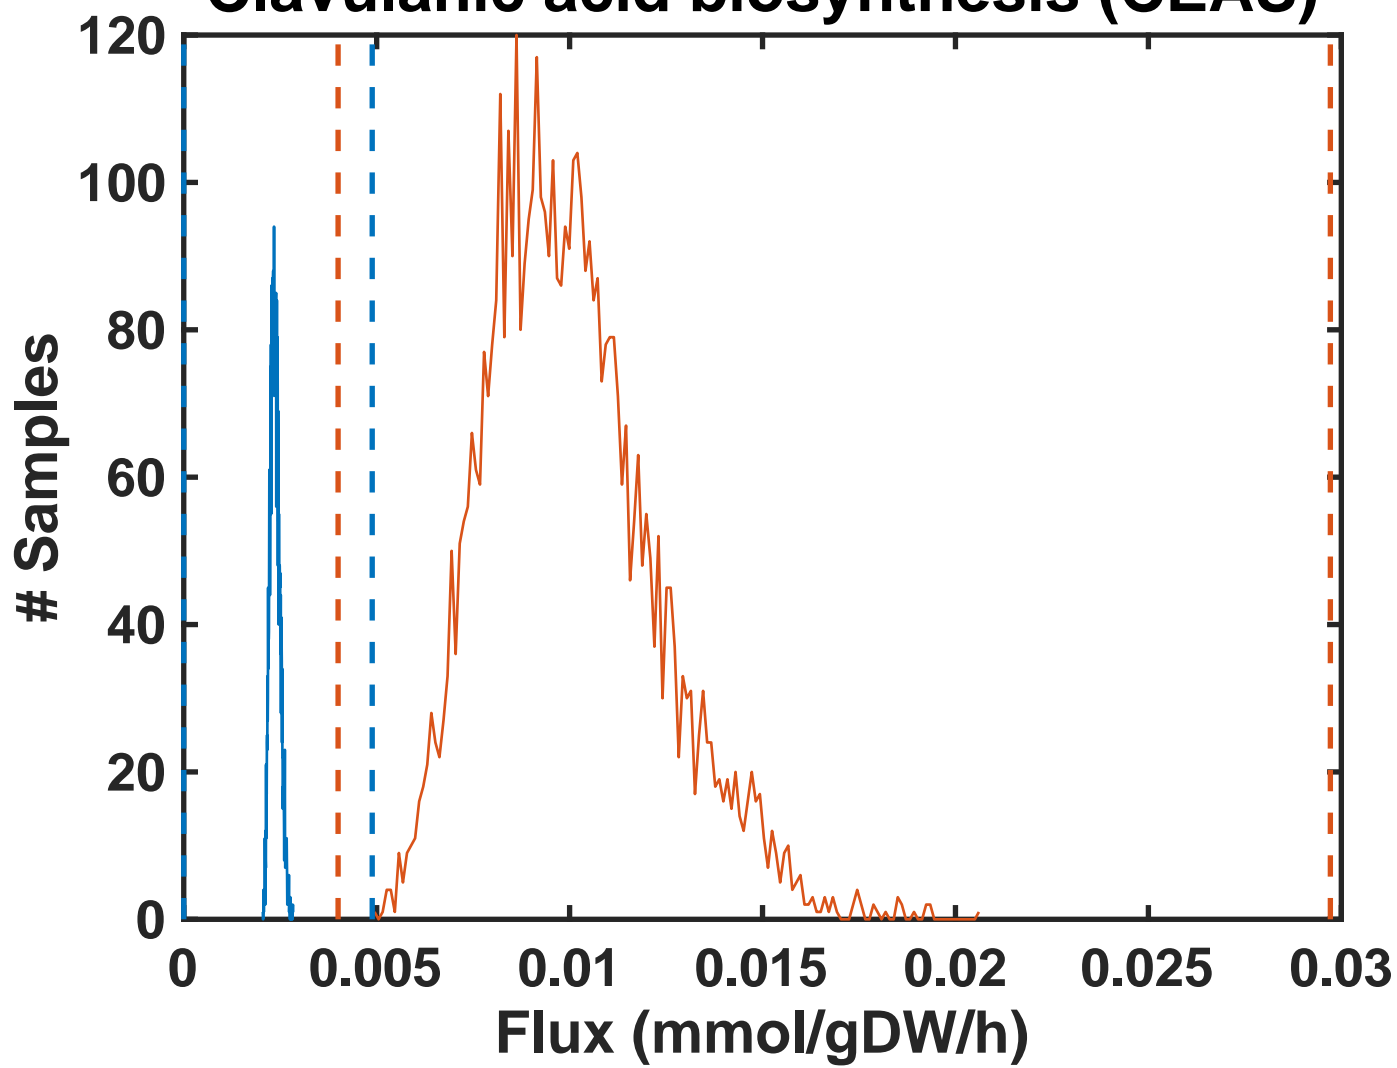

Supplement: s1 [file s1]

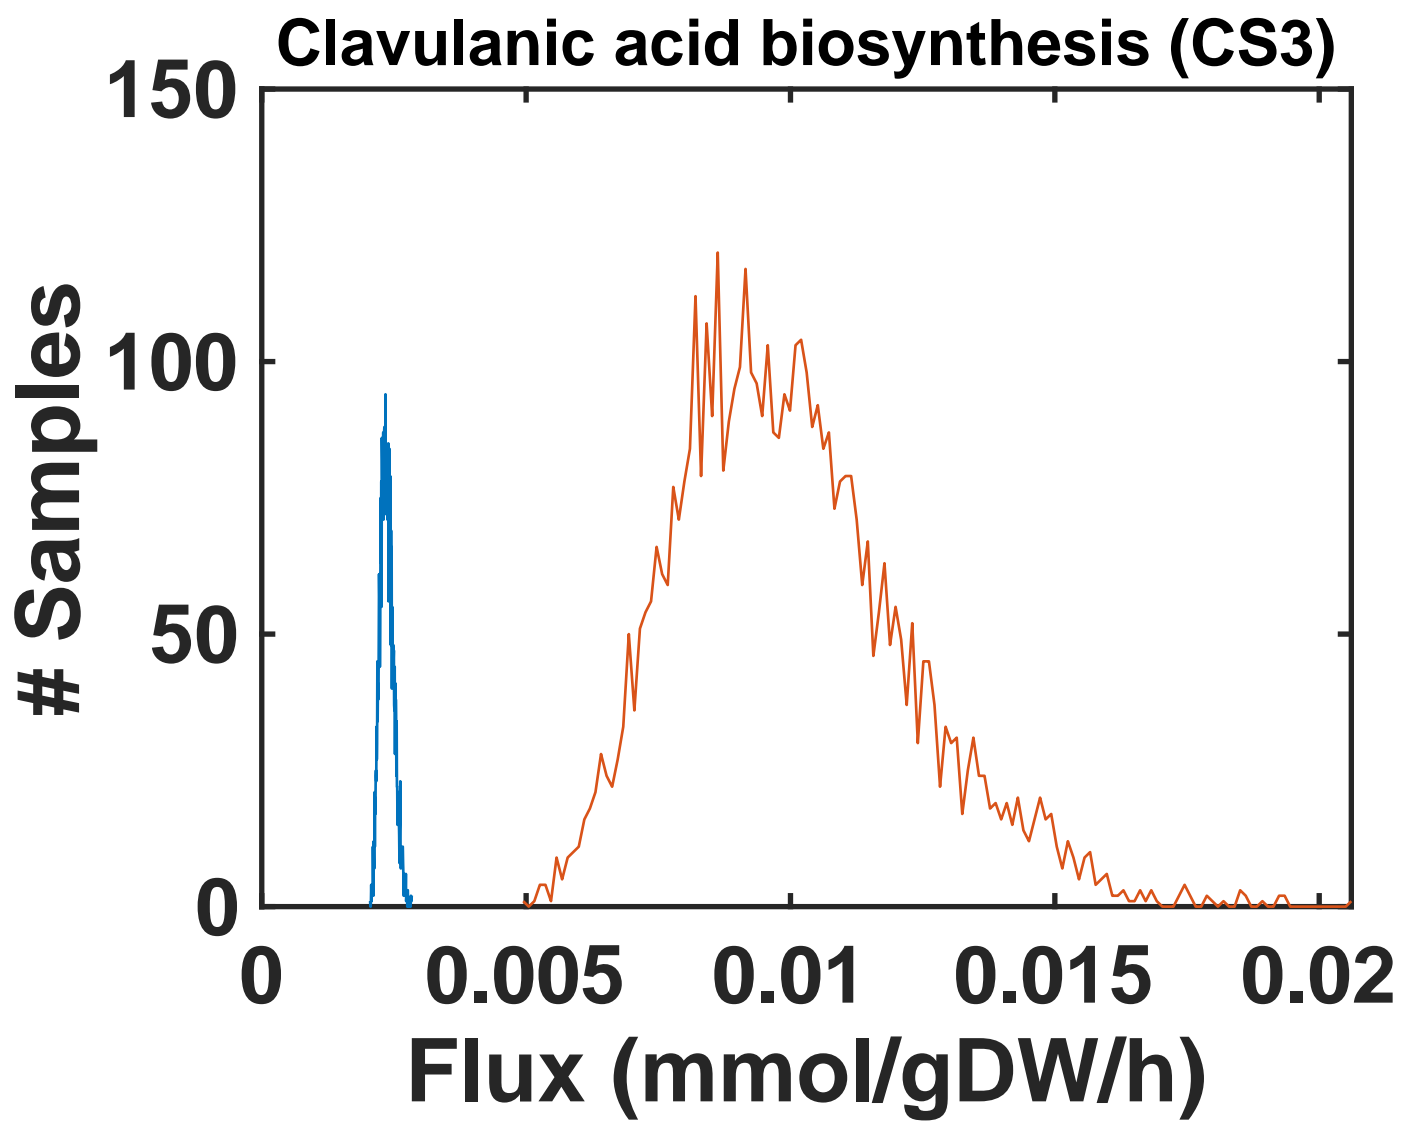

Supplement: s1 [file s1]

## Pentose Phosphate Pathway (TKT1)

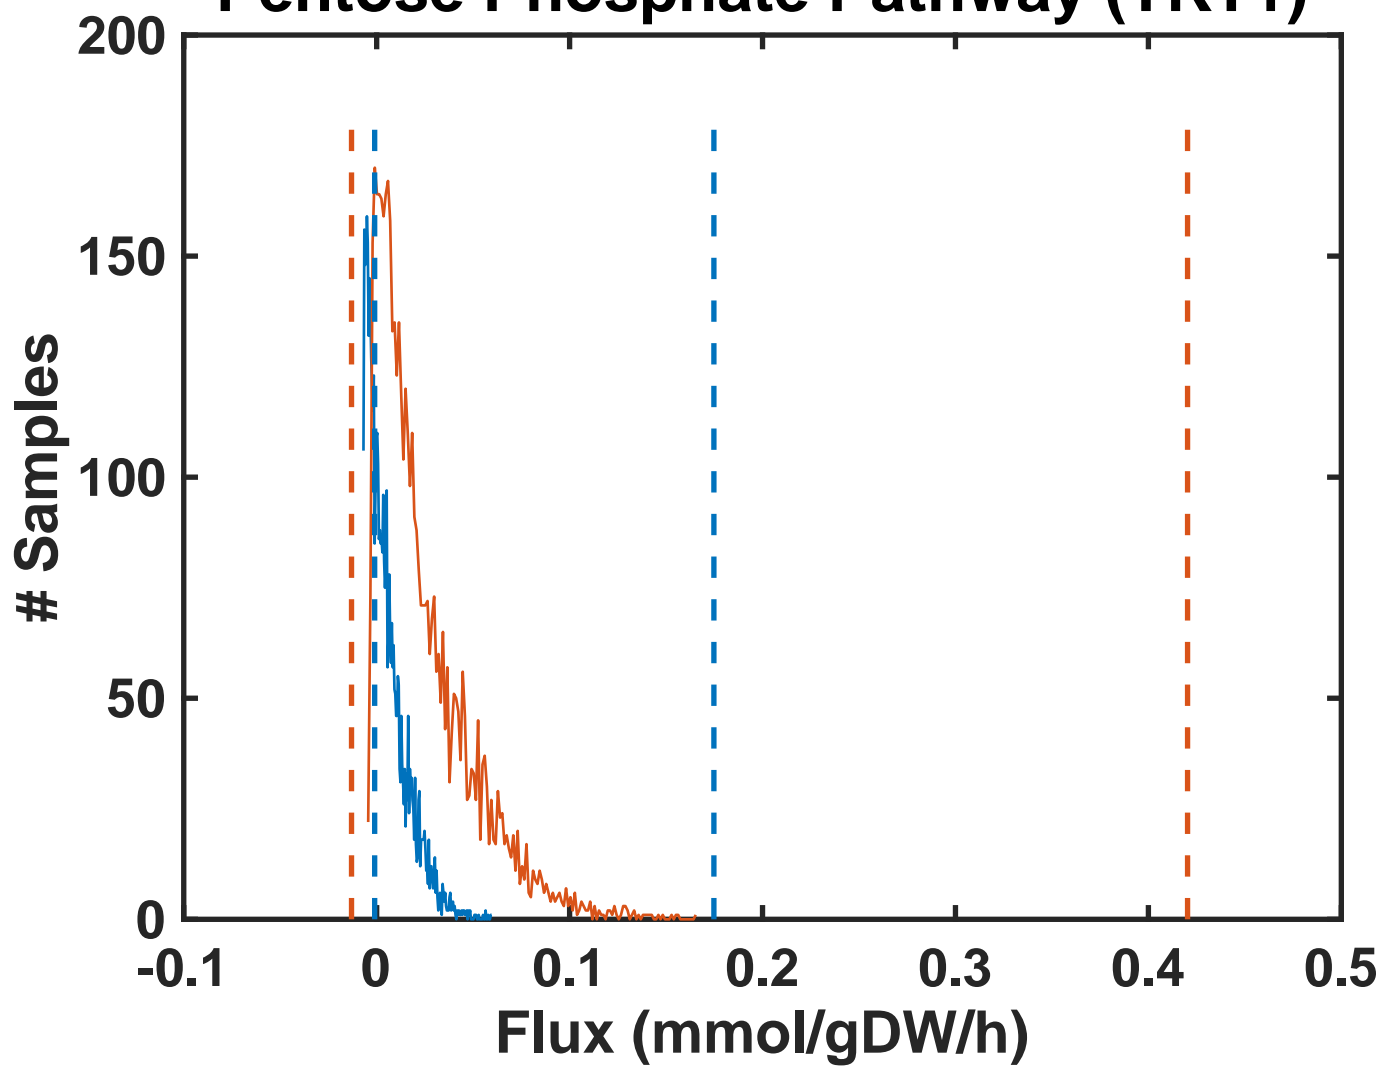

Supplement: s1 [file s1]

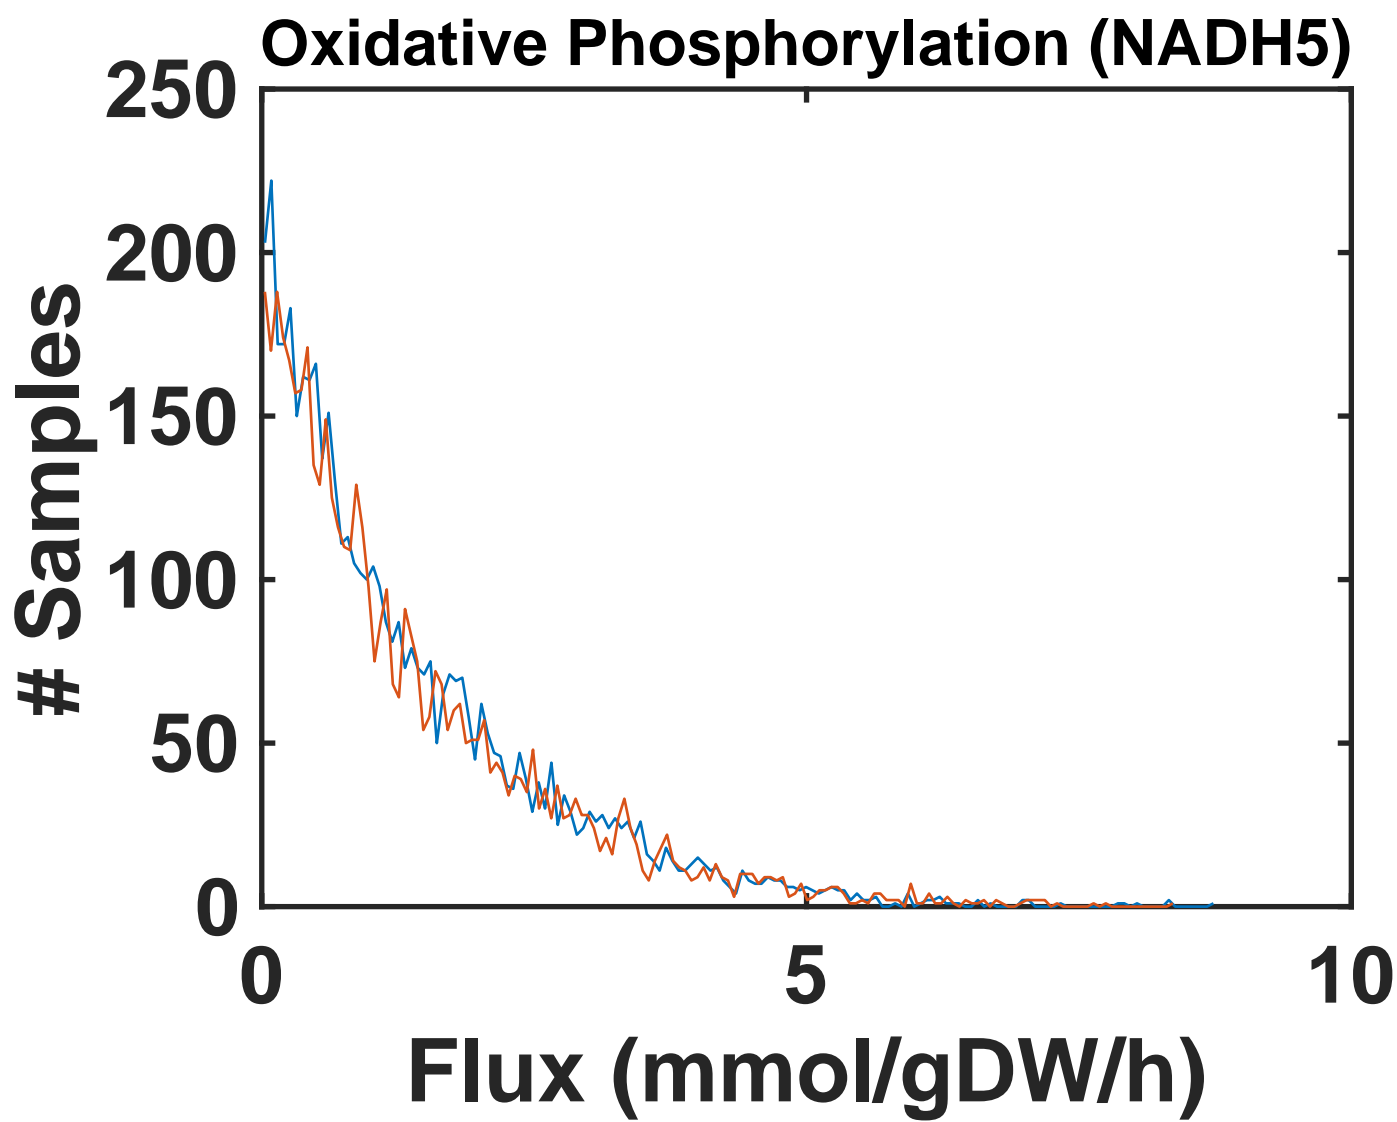

Supplement: s1 [file s1]

Exchange ( $EX_n h4_e$ )

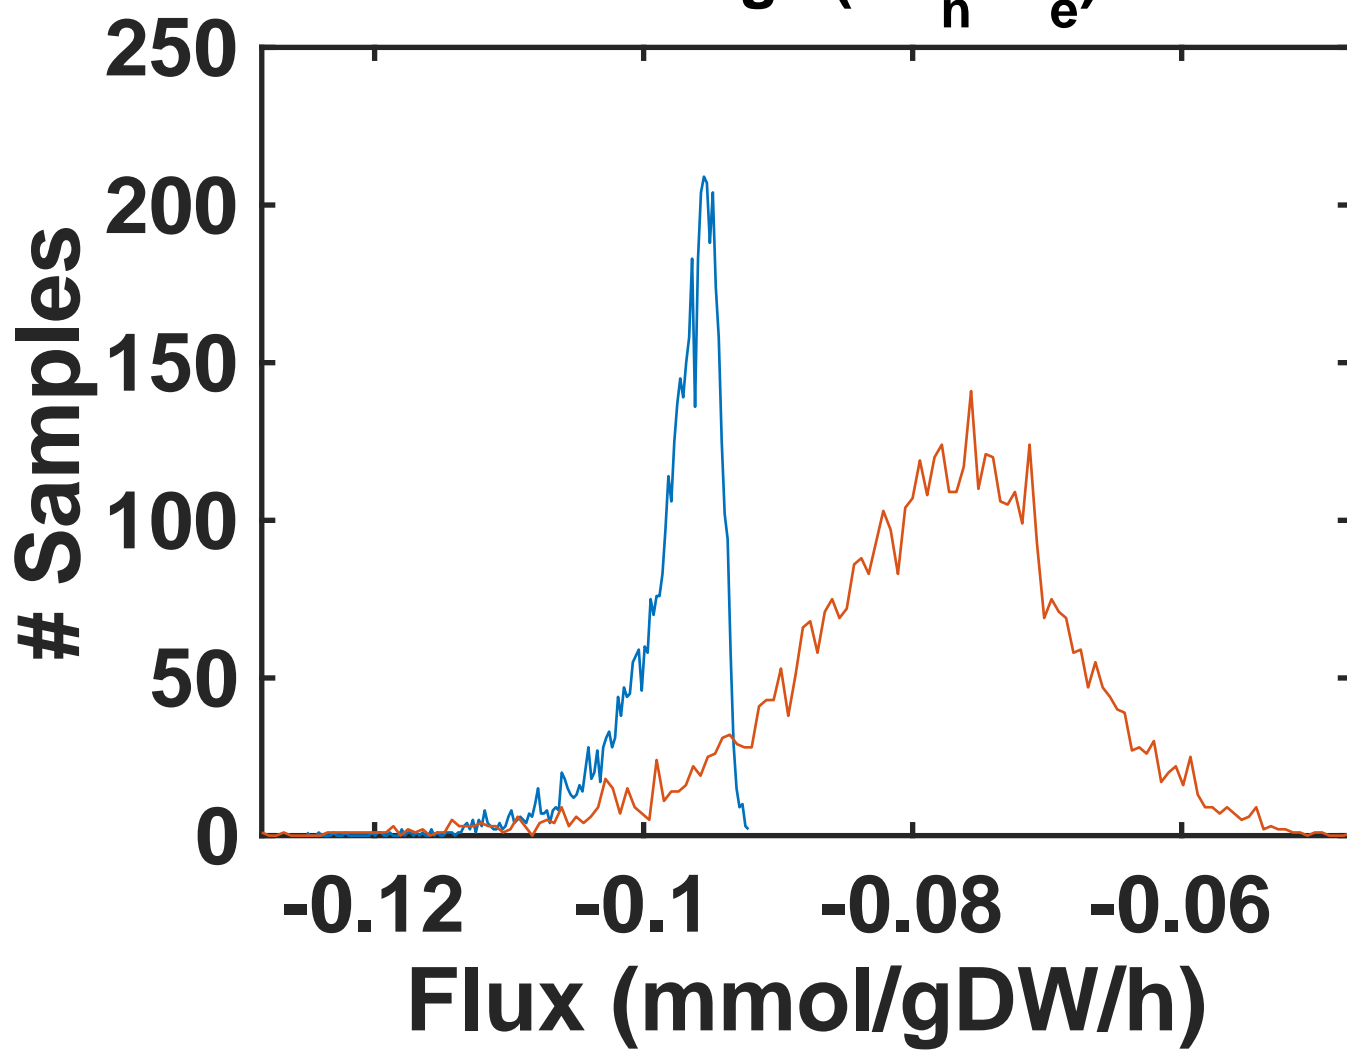

Supplement: s1 [file s1]

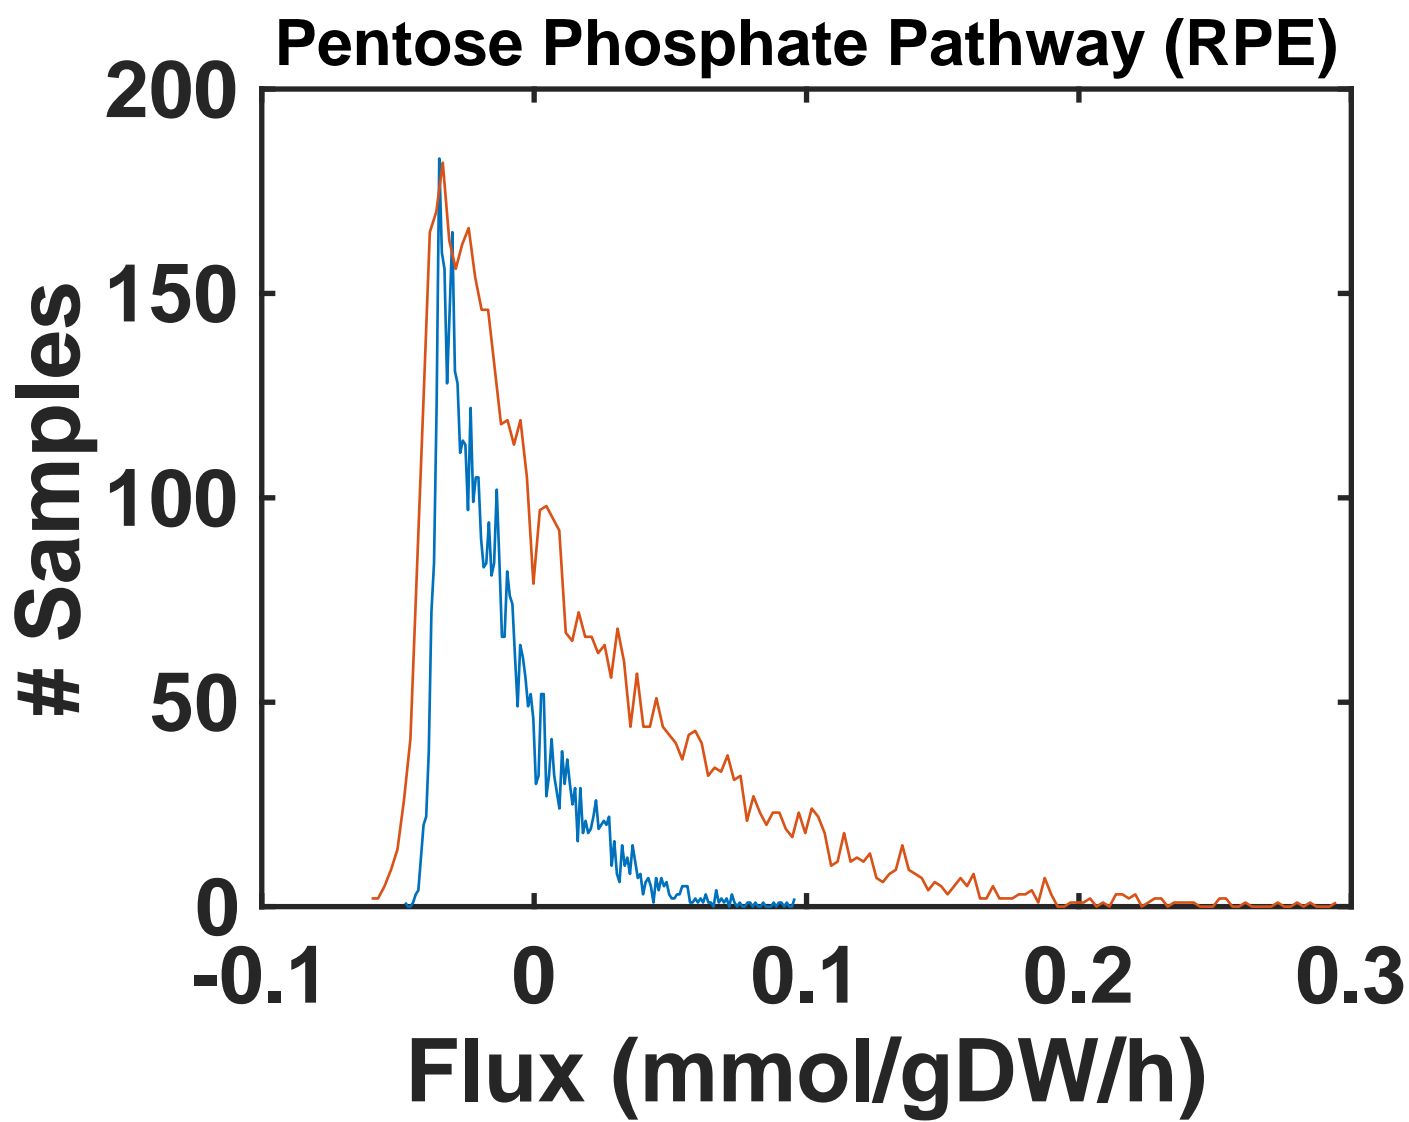

Supplement: s1 [file s1]

## Anaplerotic Reactions (ME2)

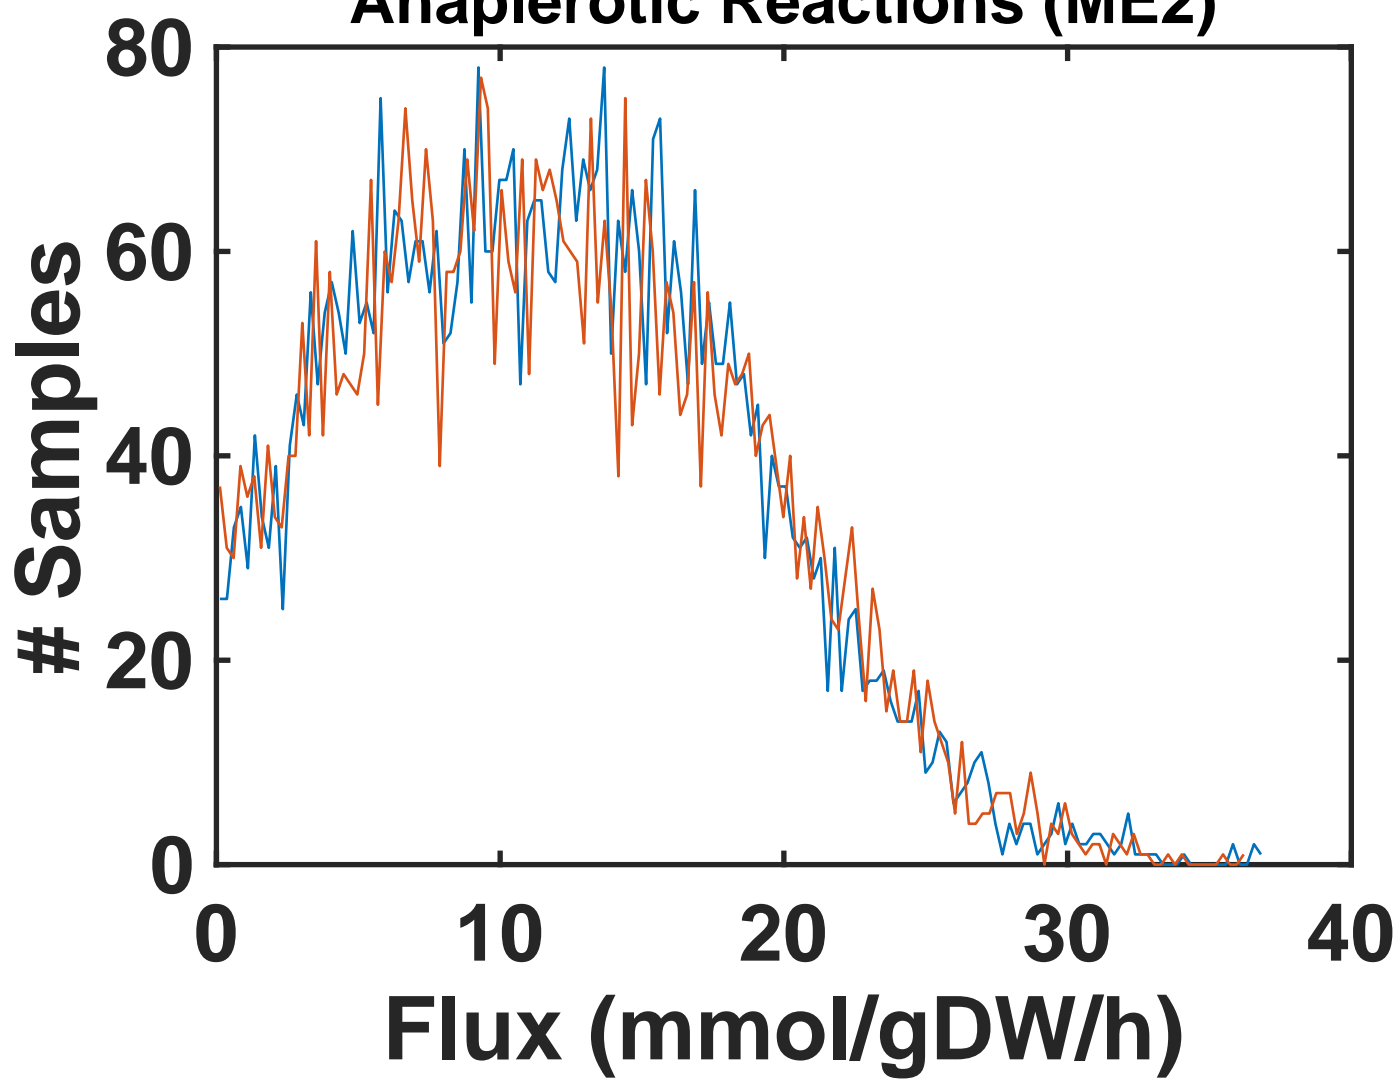

Supplement: s1 [file s1]

## Glutamate metabolism (GLUDxi)

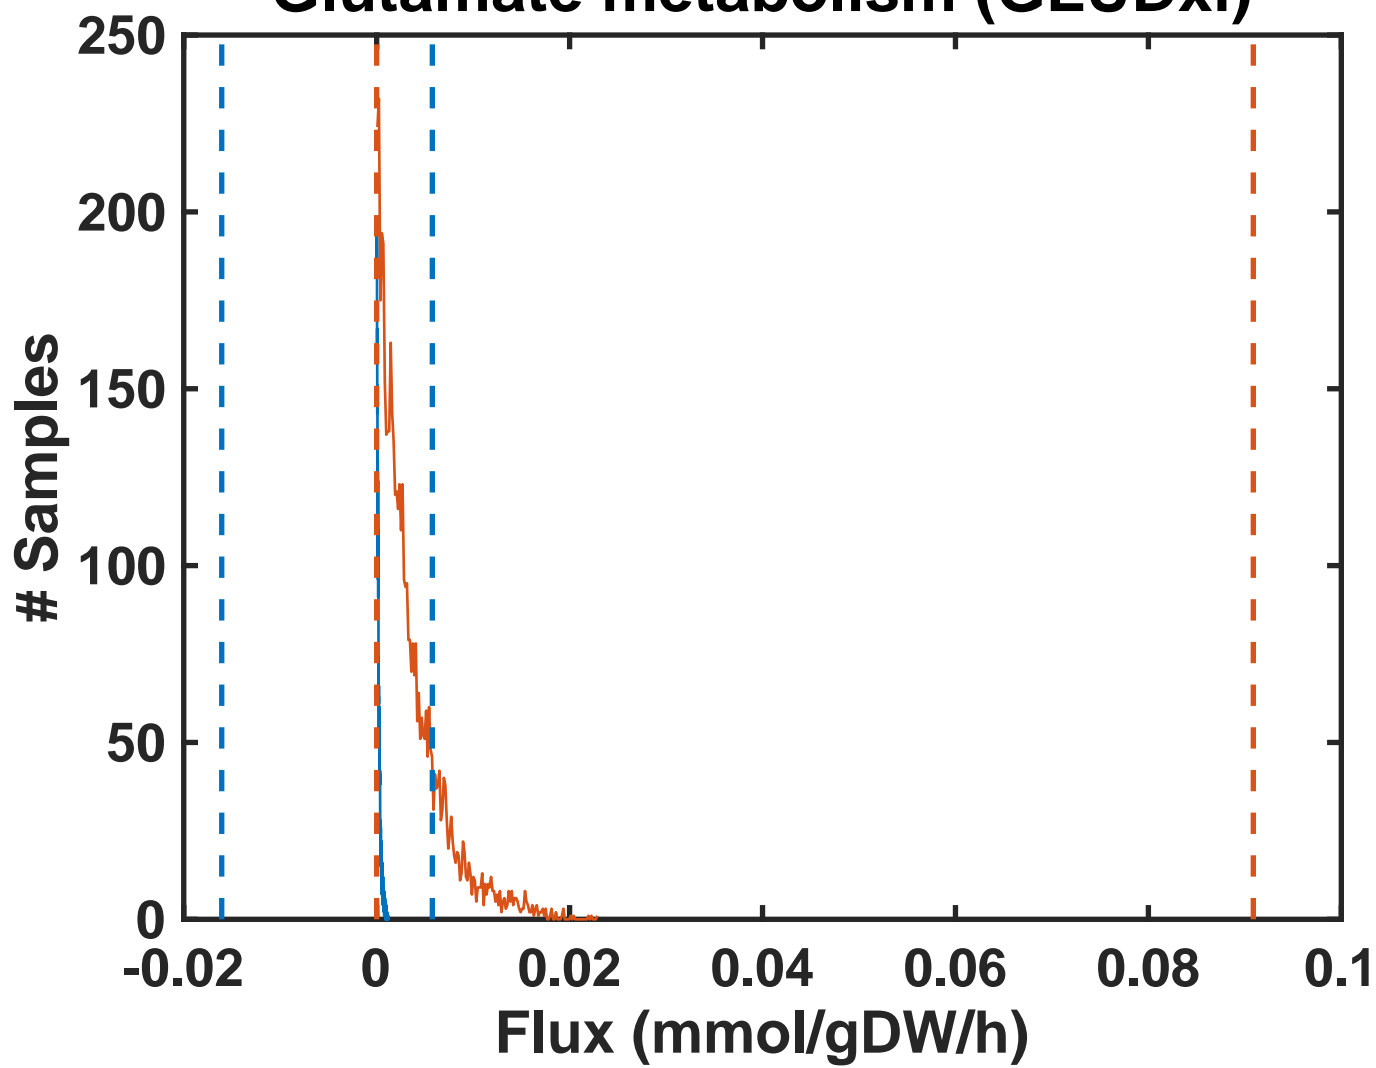

Supplement: s1 [file s1]

## Citric Acid Cycle (ICDHyr)

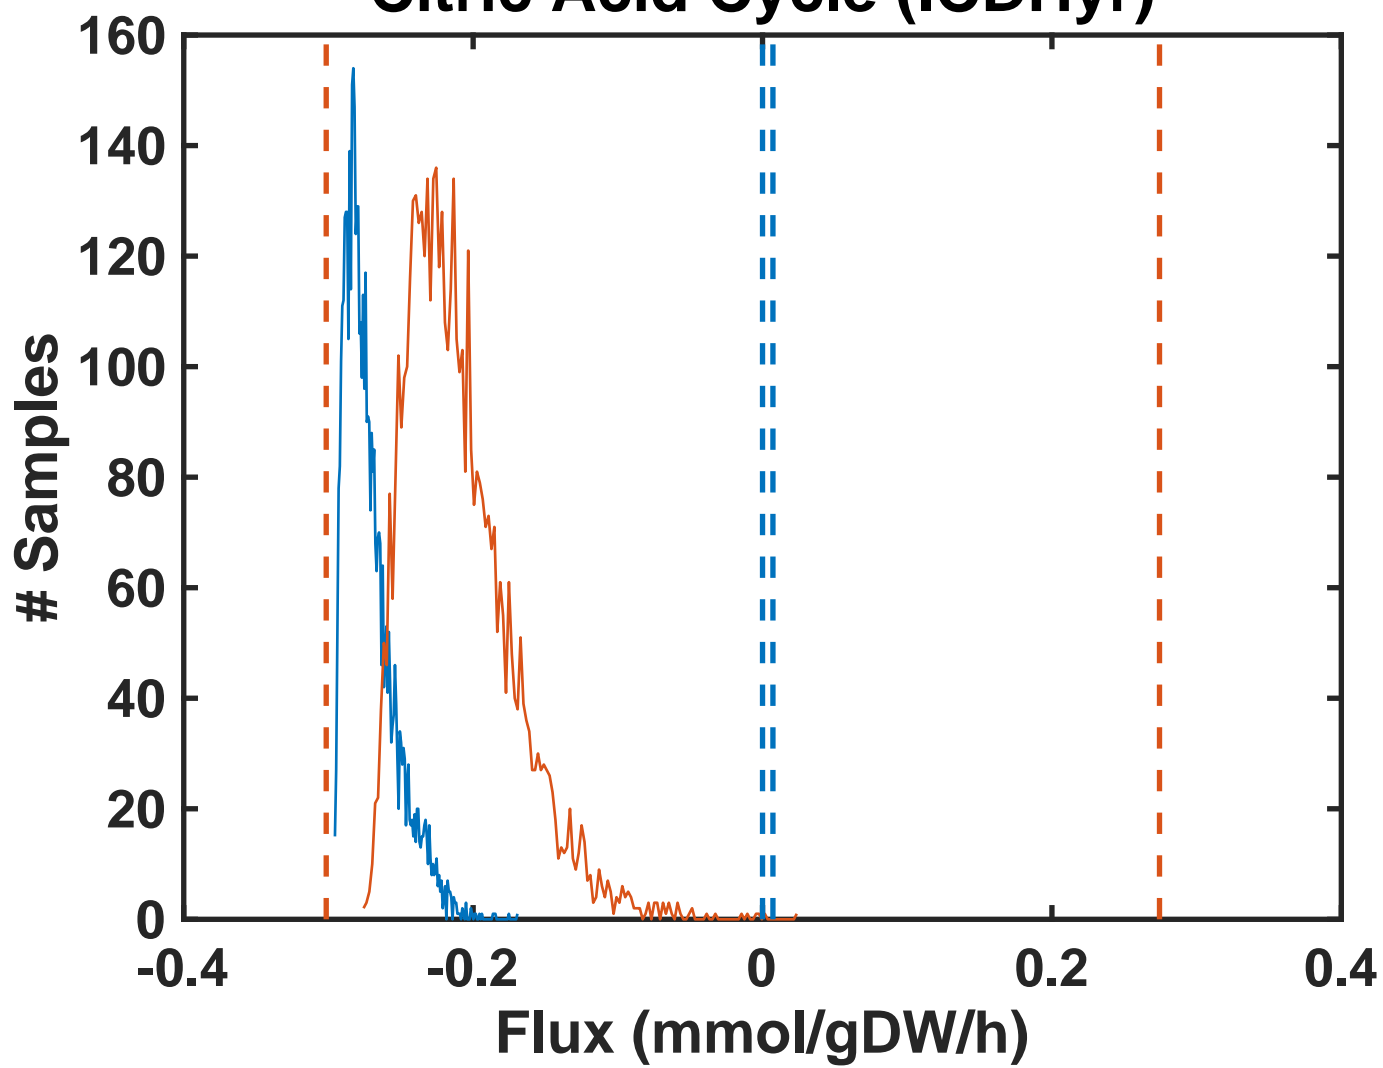

Supplement: s1 [file s1]

# Exchange ( $EX_n h4_e$ )

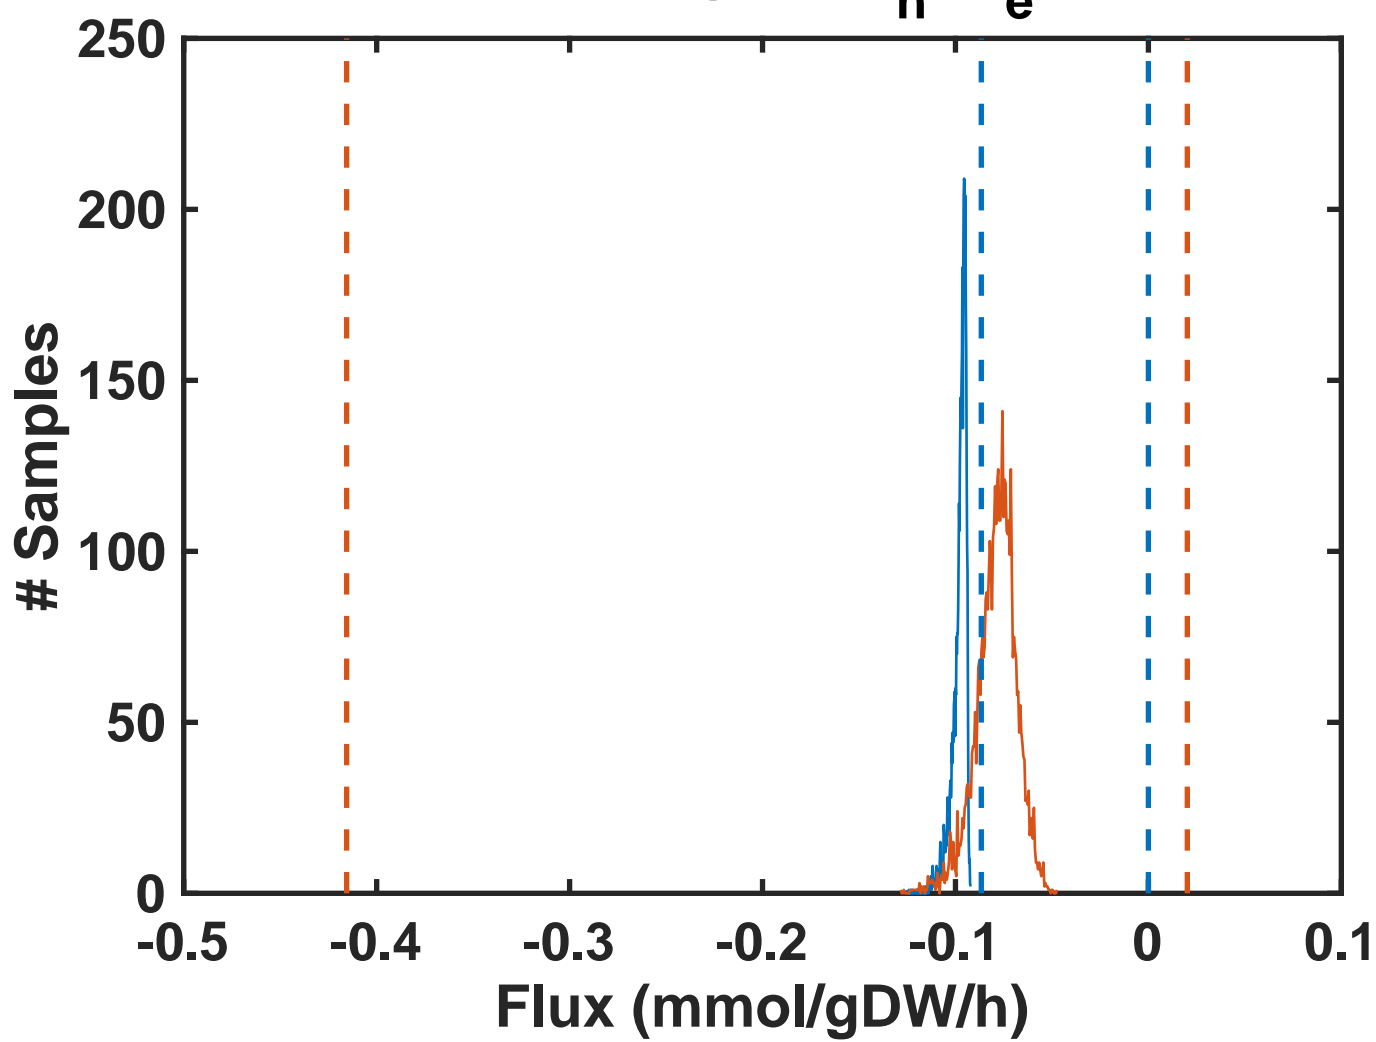

Supplement: s1 [file s1]

Exchange ( $EX_{c\ lav_e}$ )

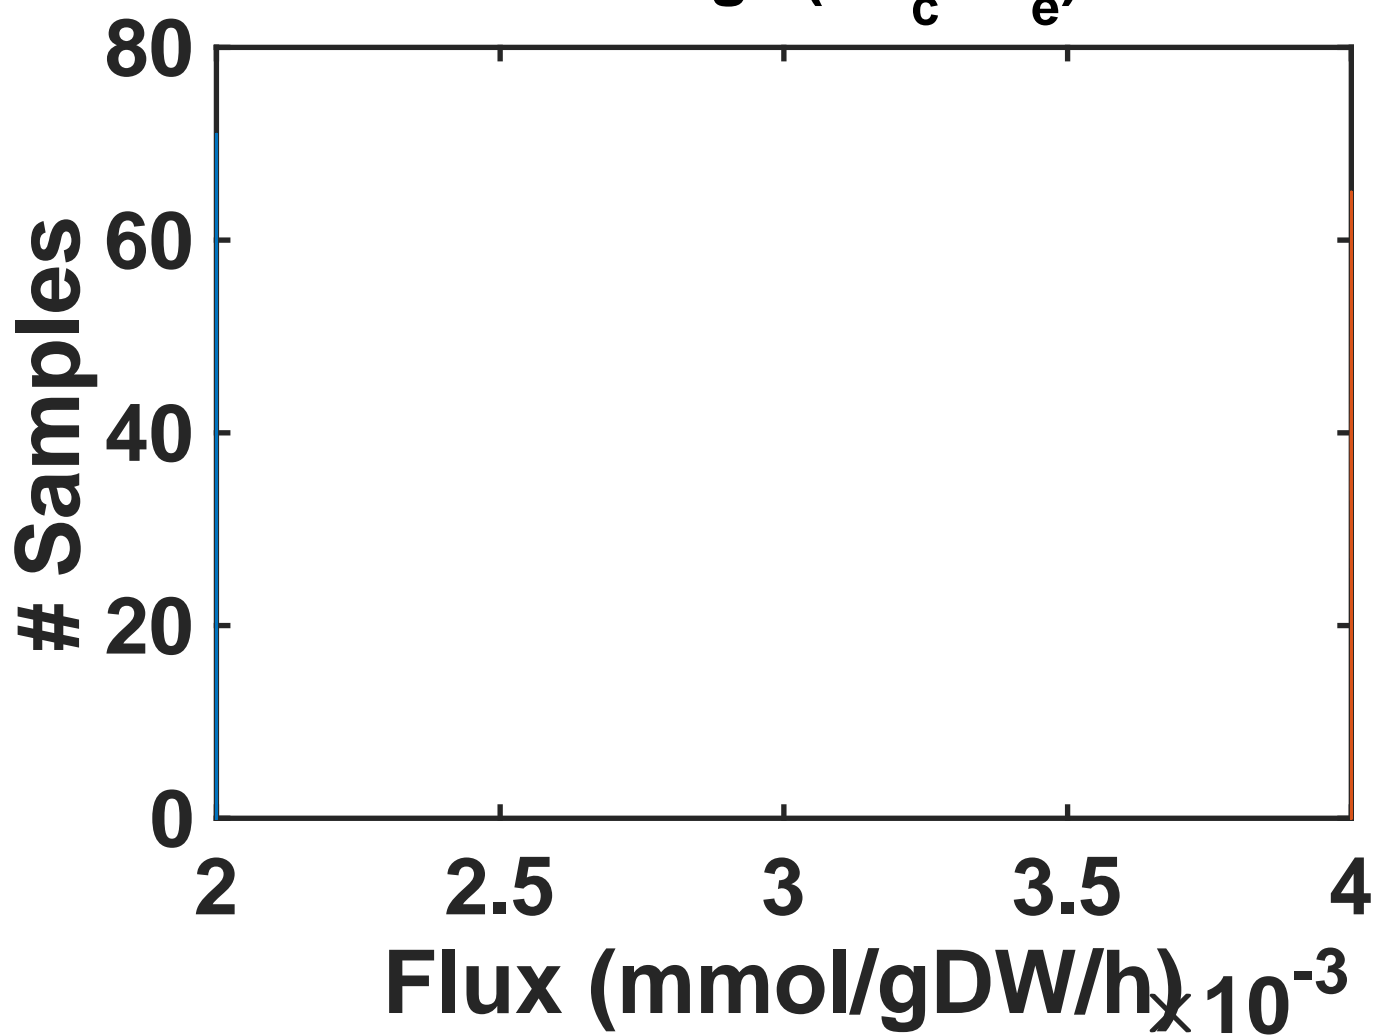

Supplement: s1 [file s1]

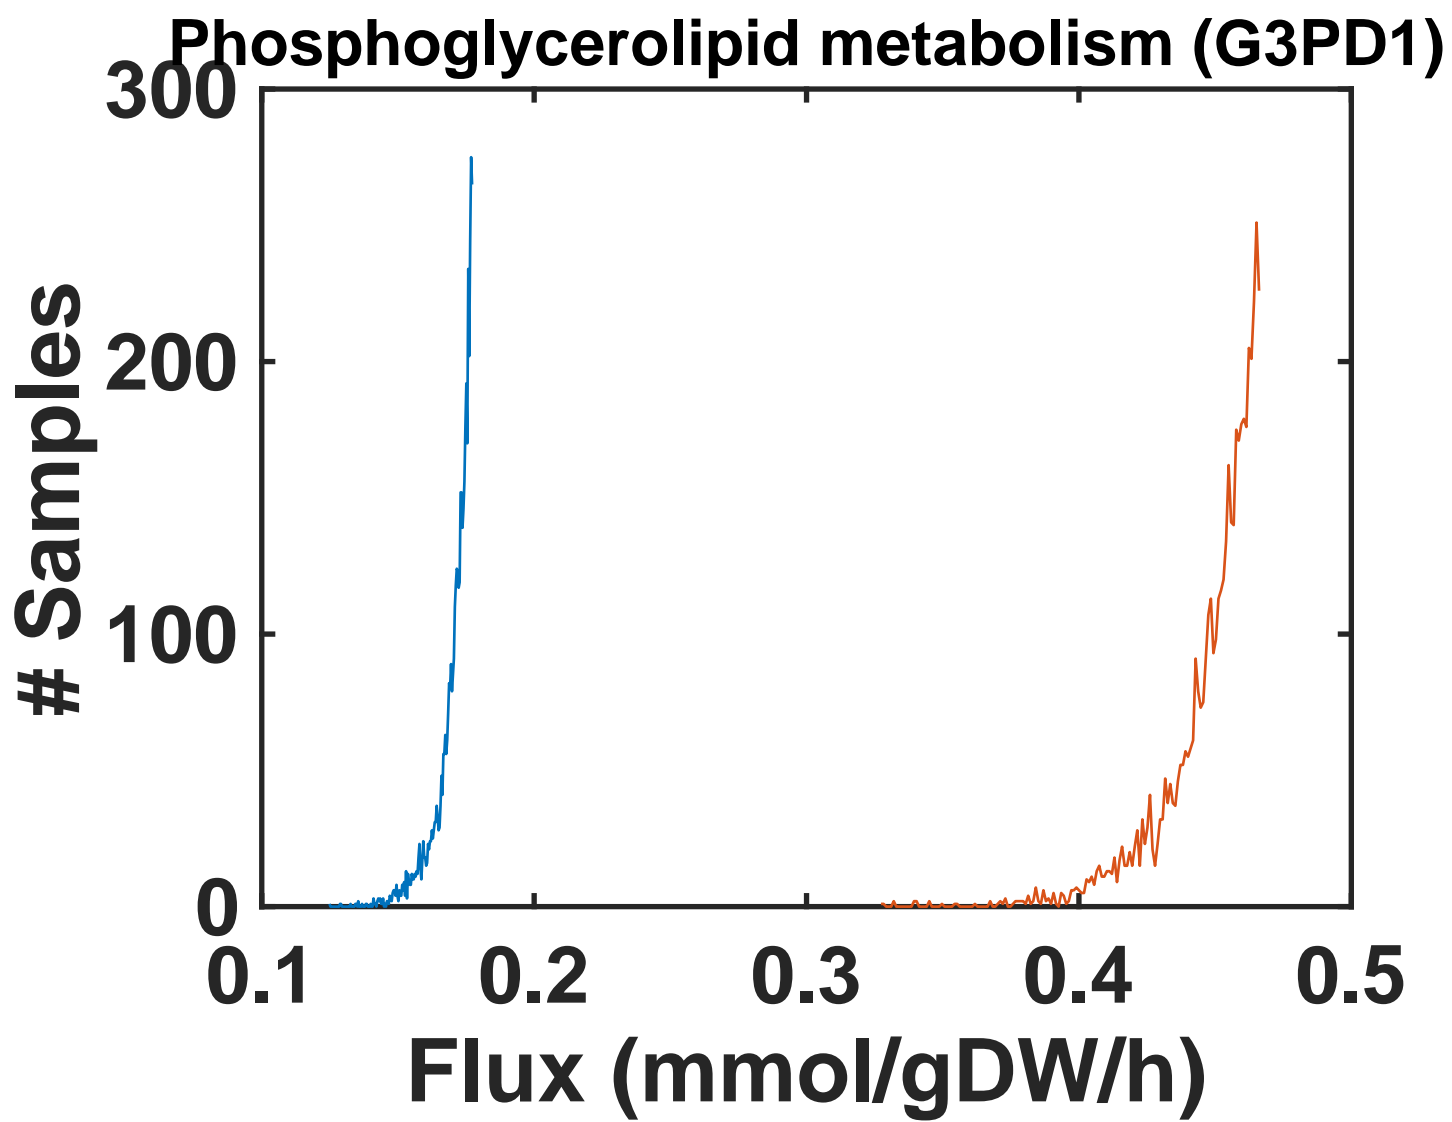

Supplement: s1 [file s1]

# Exchange ( $EX_c lav_e$ )

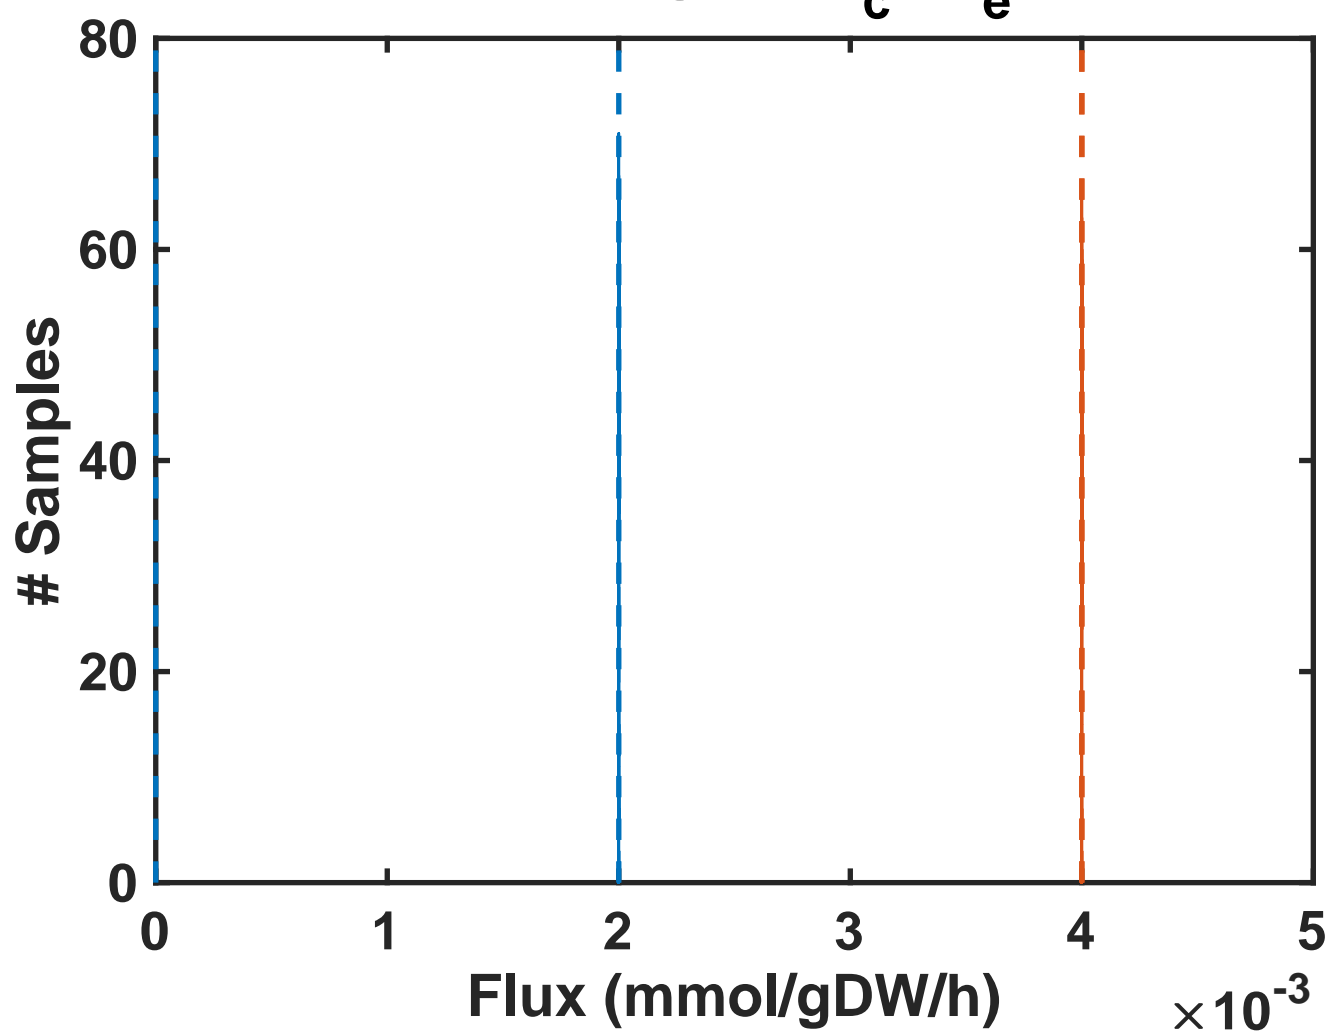

Supplement: s1 [file s1]

(LMPD<sub>1</sub>16<sub>g</sub>In-L<sub>c</sub>)

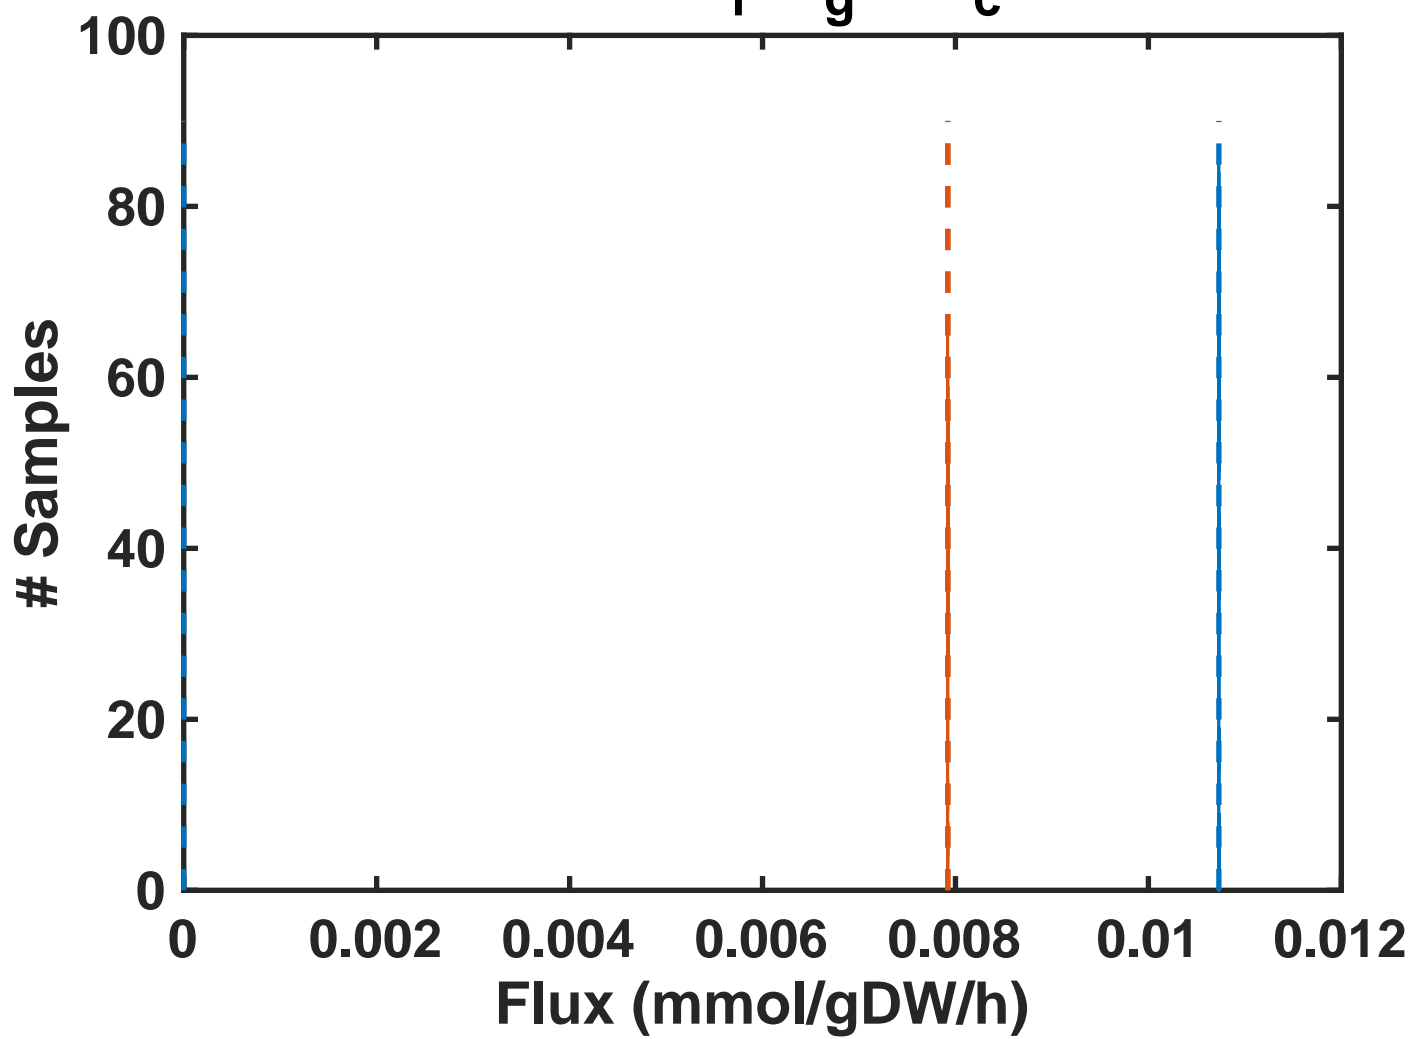

Supplement: s1 [file s1]

# Citric Acid Cycle (MDH)

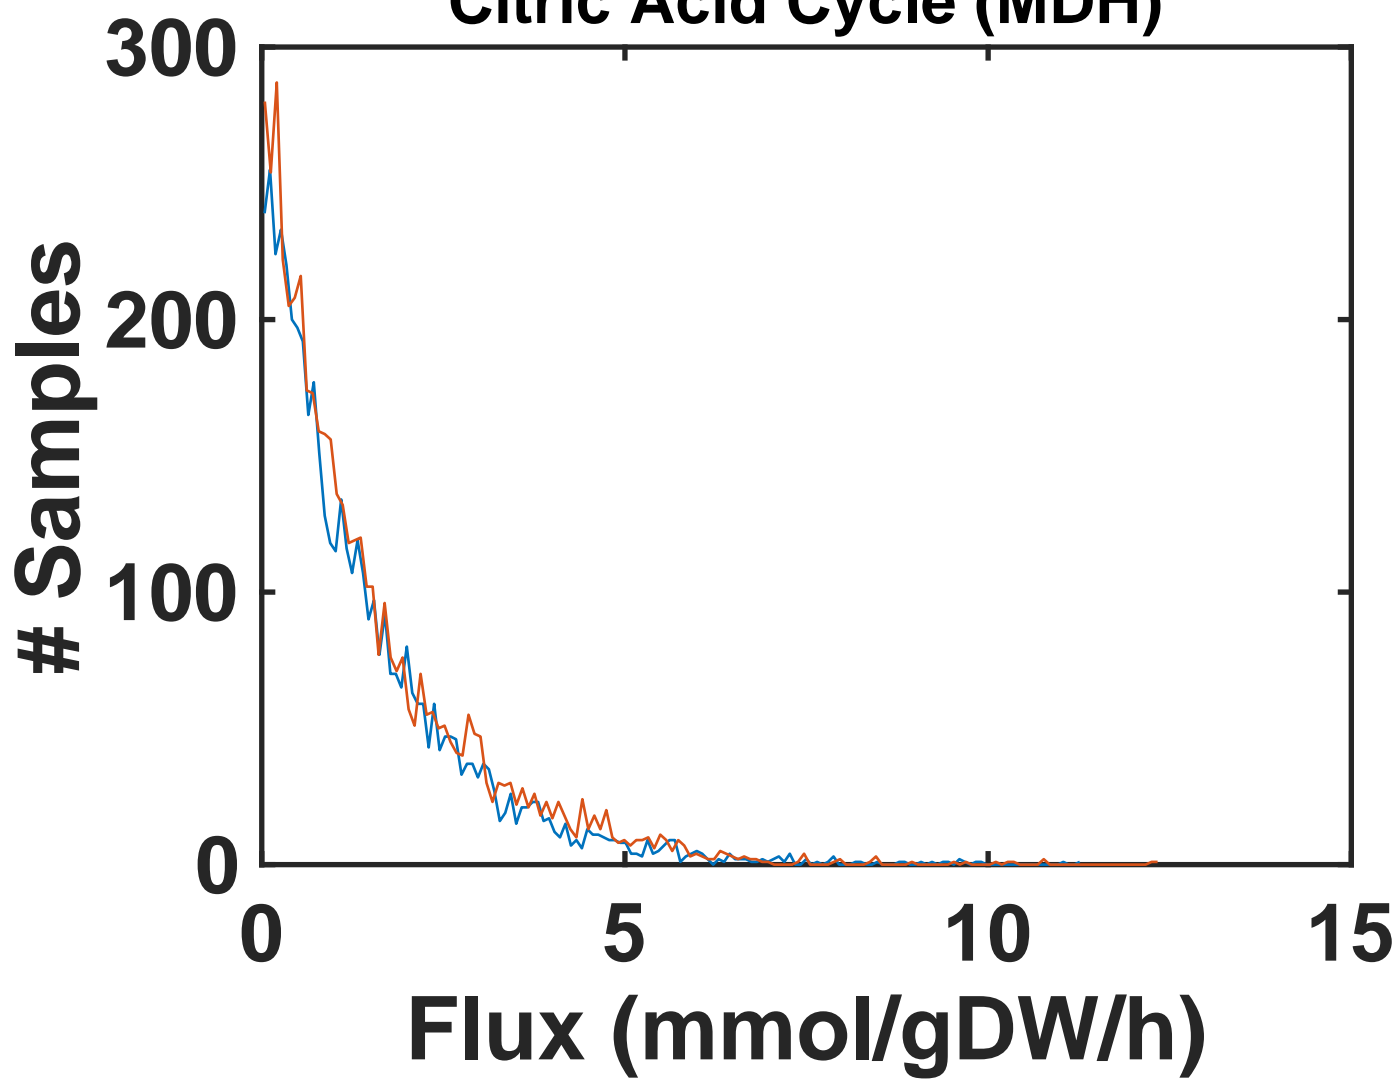

Supplement: s1 [file s1]

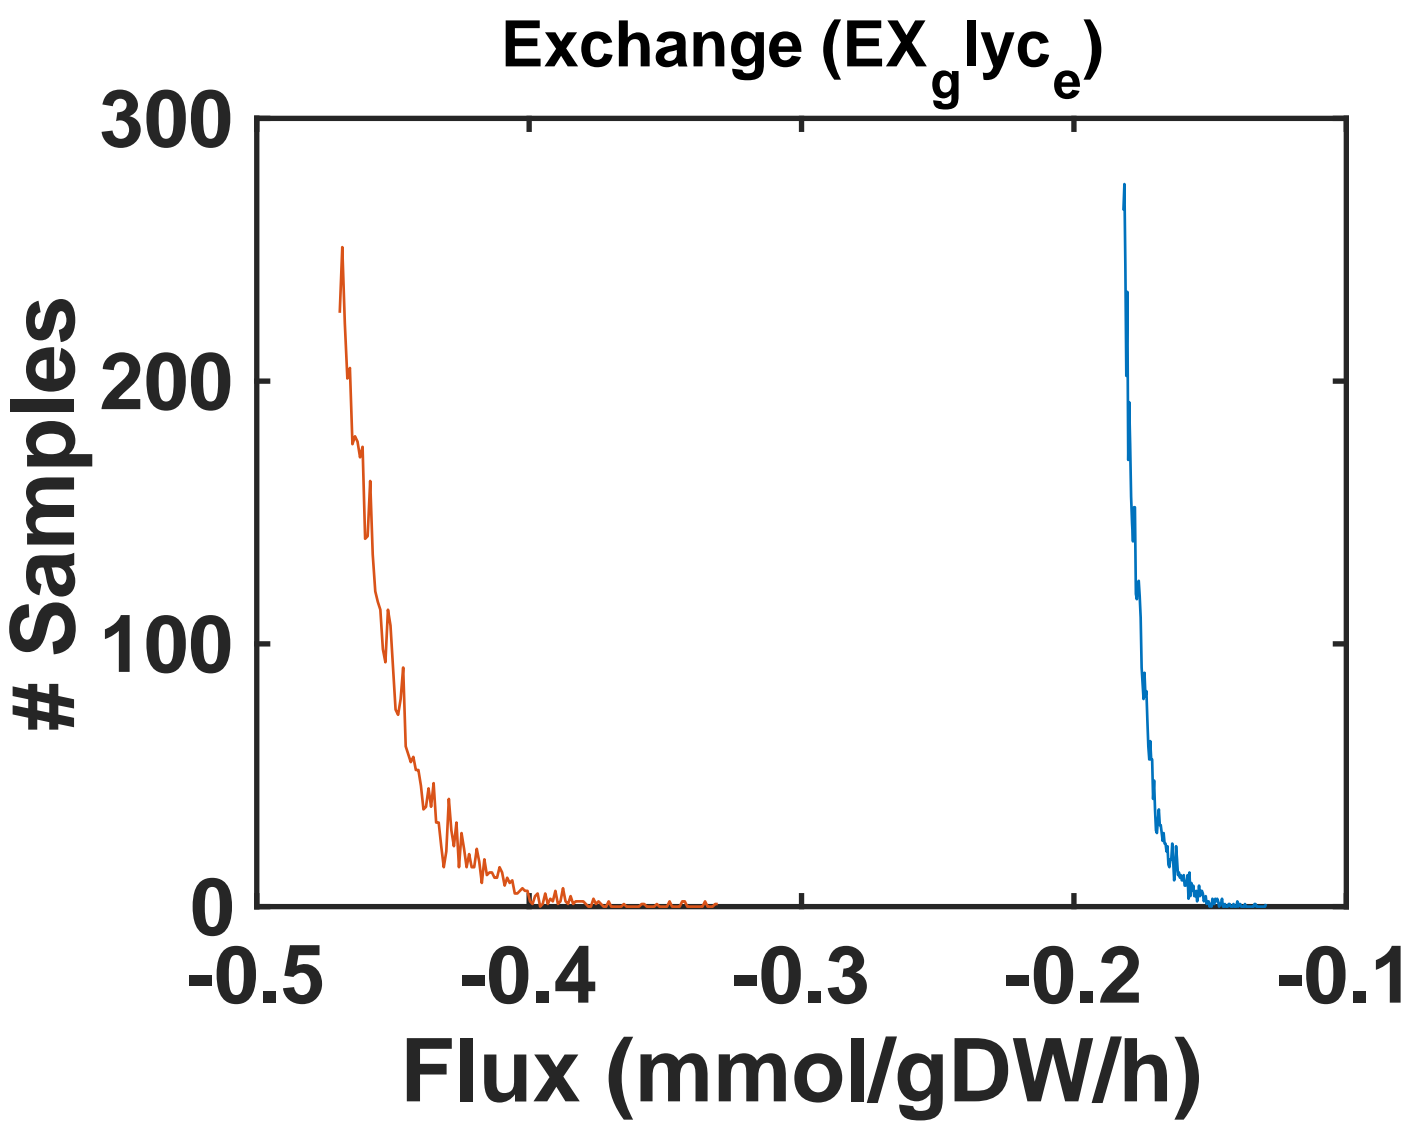

Supplement: s1 [file s1]

## Oxidative Phosphorylation (ATPS4rpp)

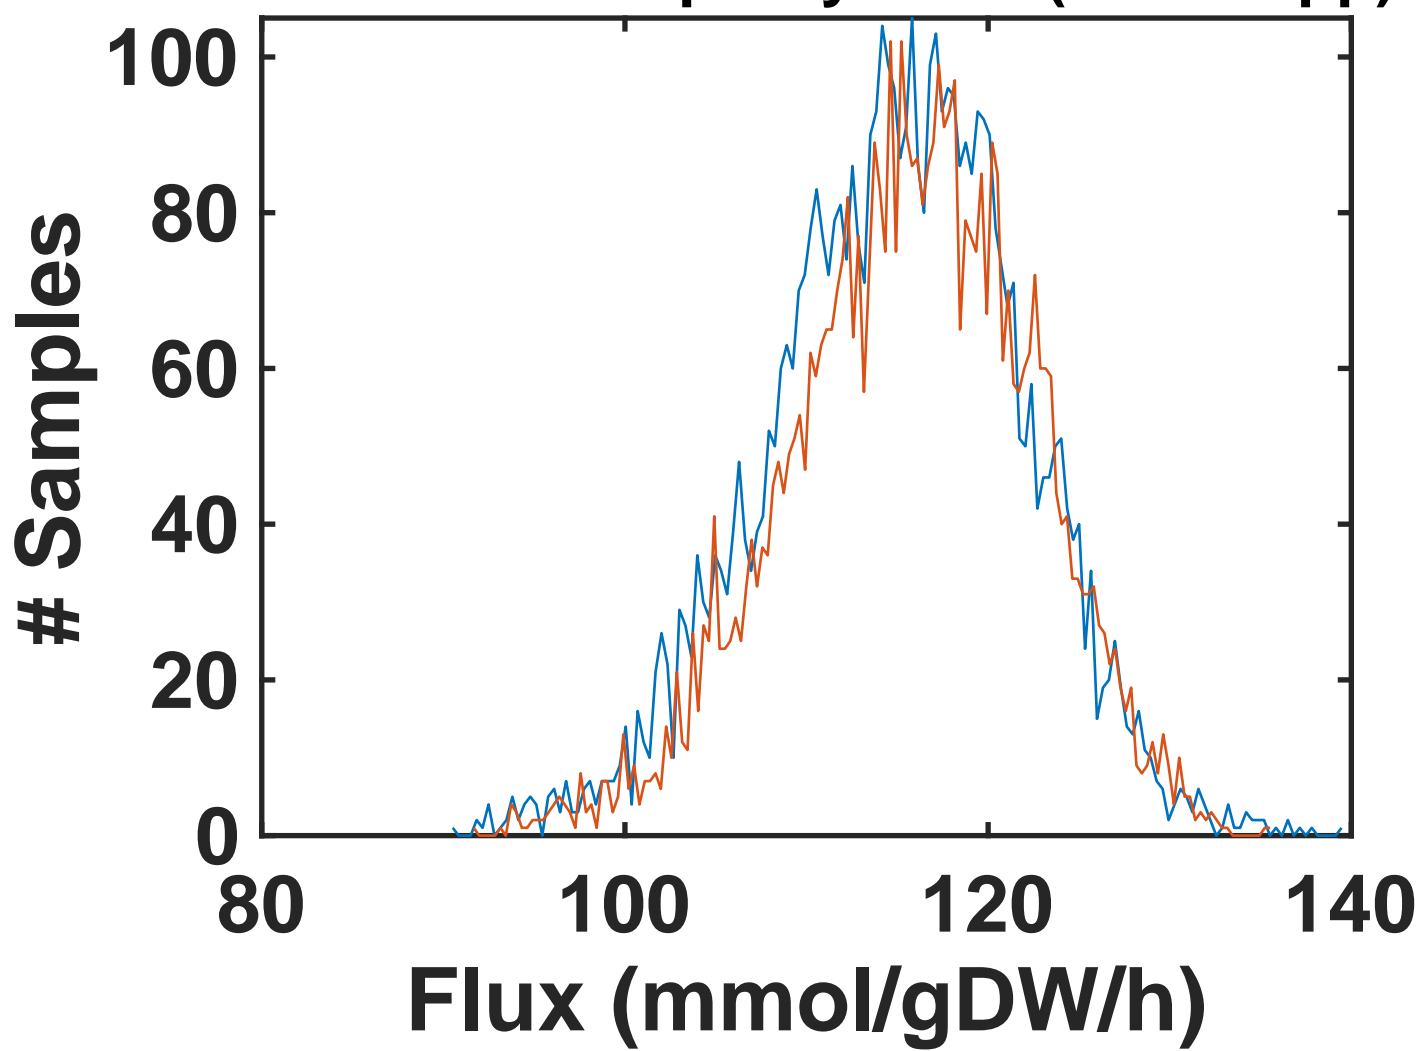

Supplement: s1 [file s1]

# Exchange ( $EX_c o2_e$ )

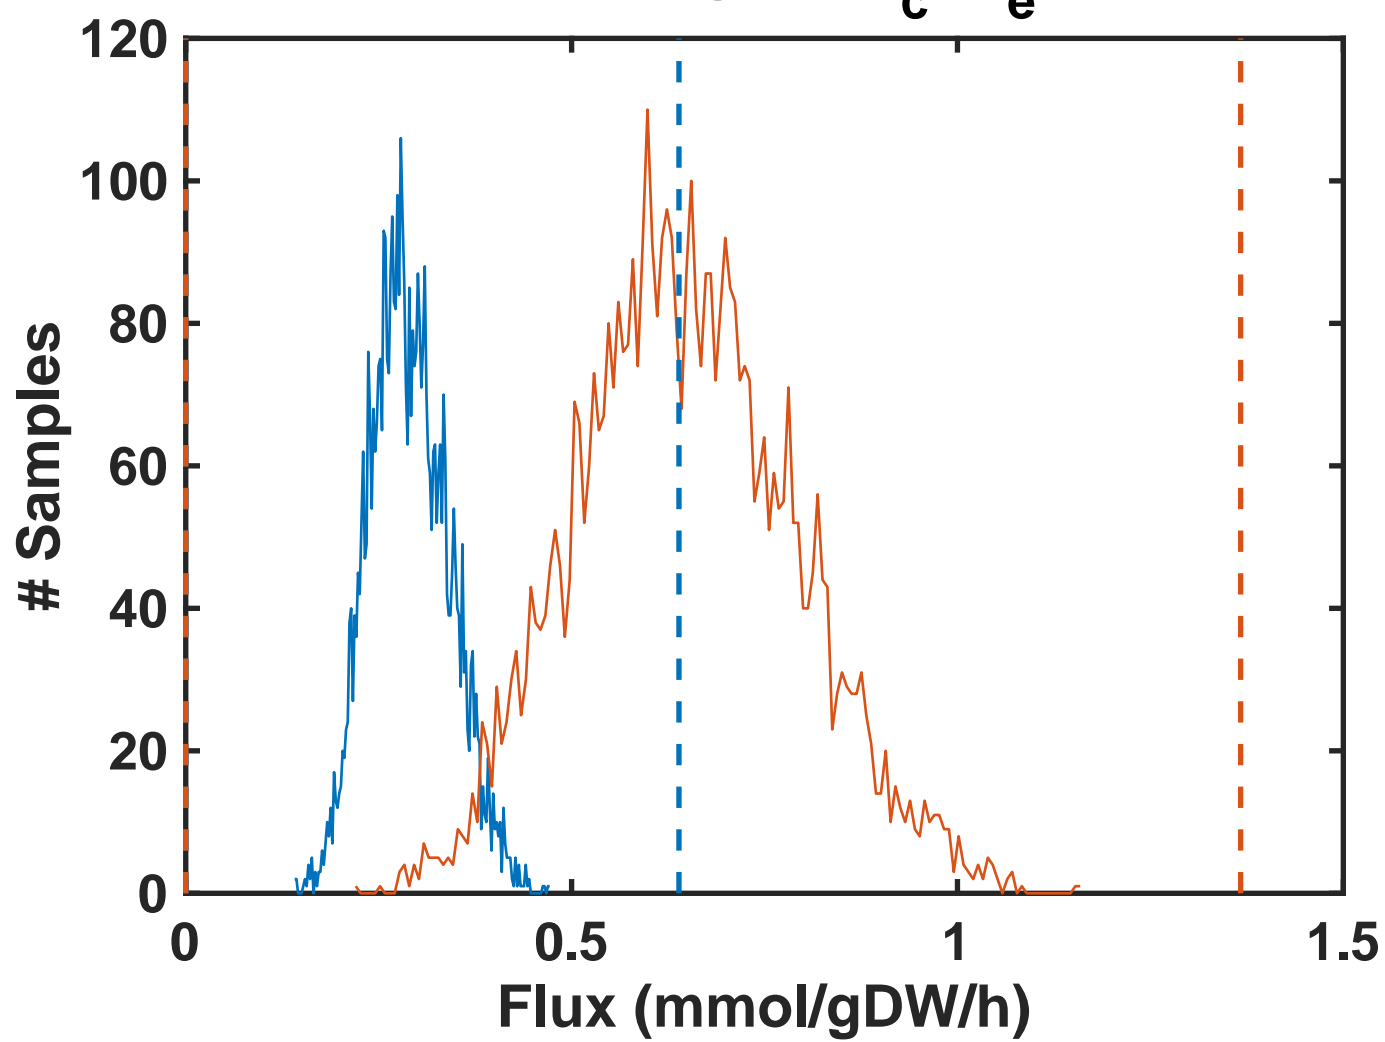

Supplement: s1 [file s1]

# Citric Acid Cycle (SUCCOAS)

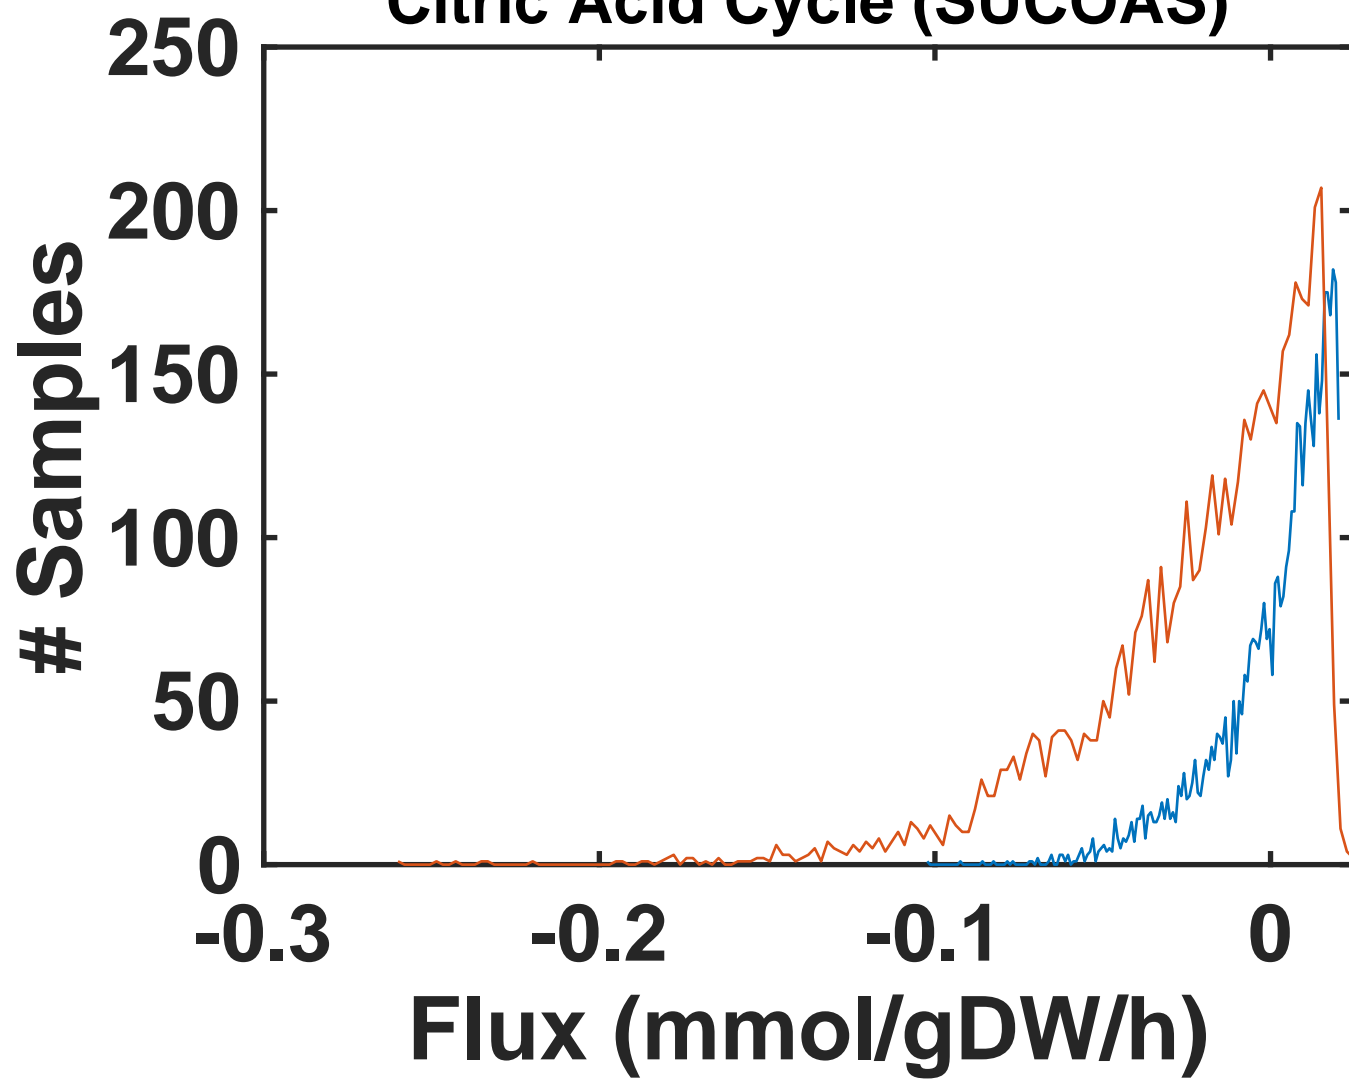

Supplement: s1 [file s1]

Exchange ( $EX_o 2_e$ )

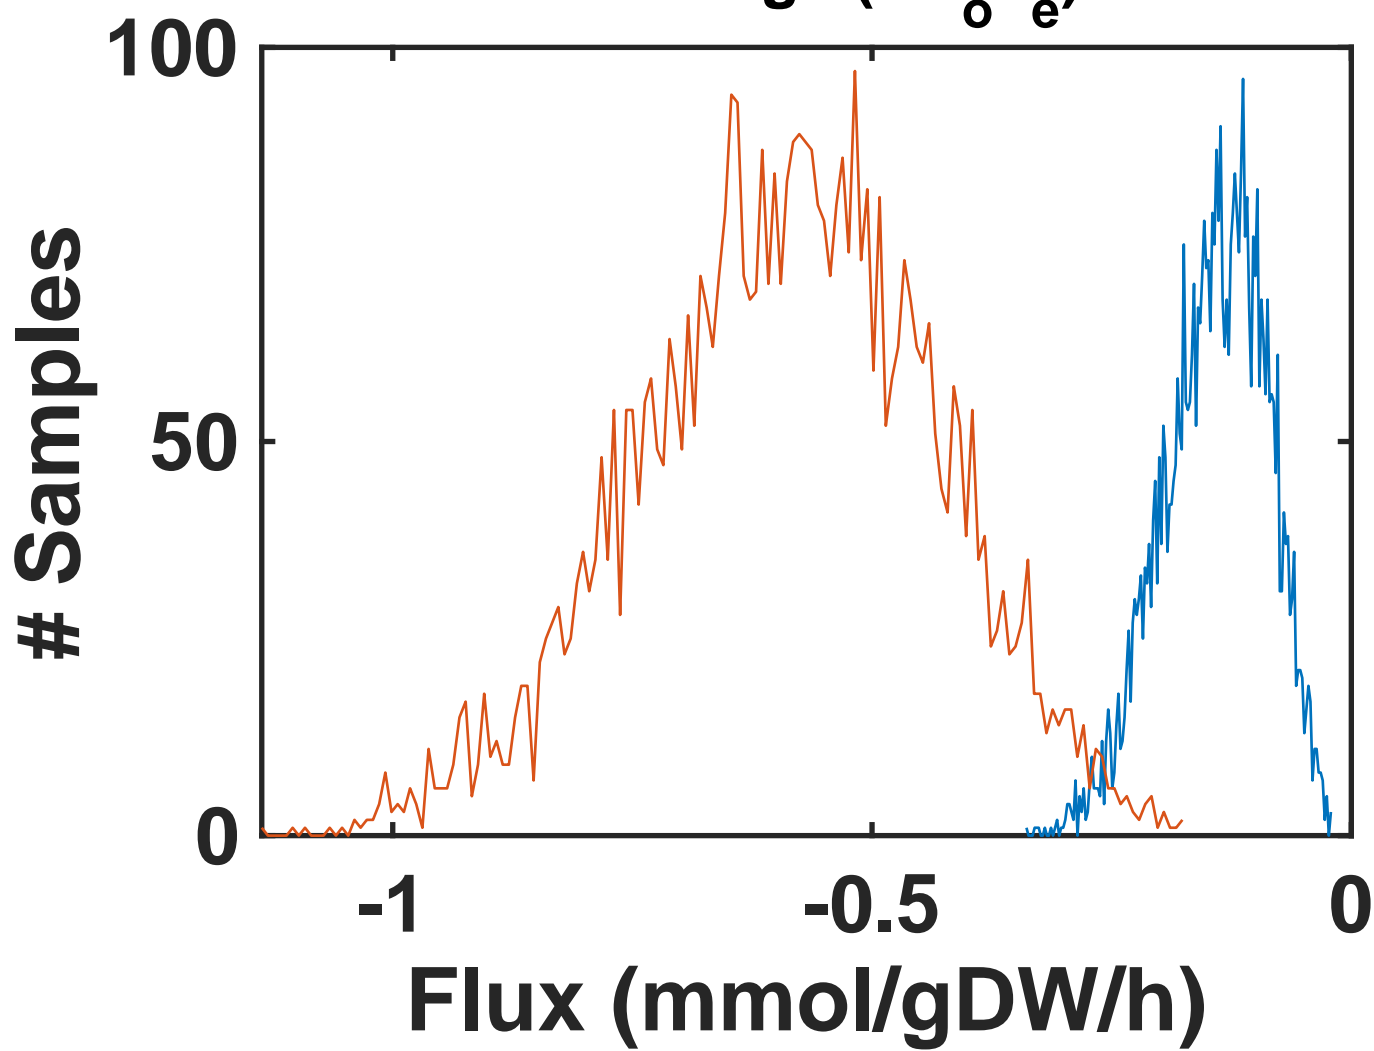

Supplement: s1 [file s1]

## Glycolysis/Gluconeogenesis (ENO)

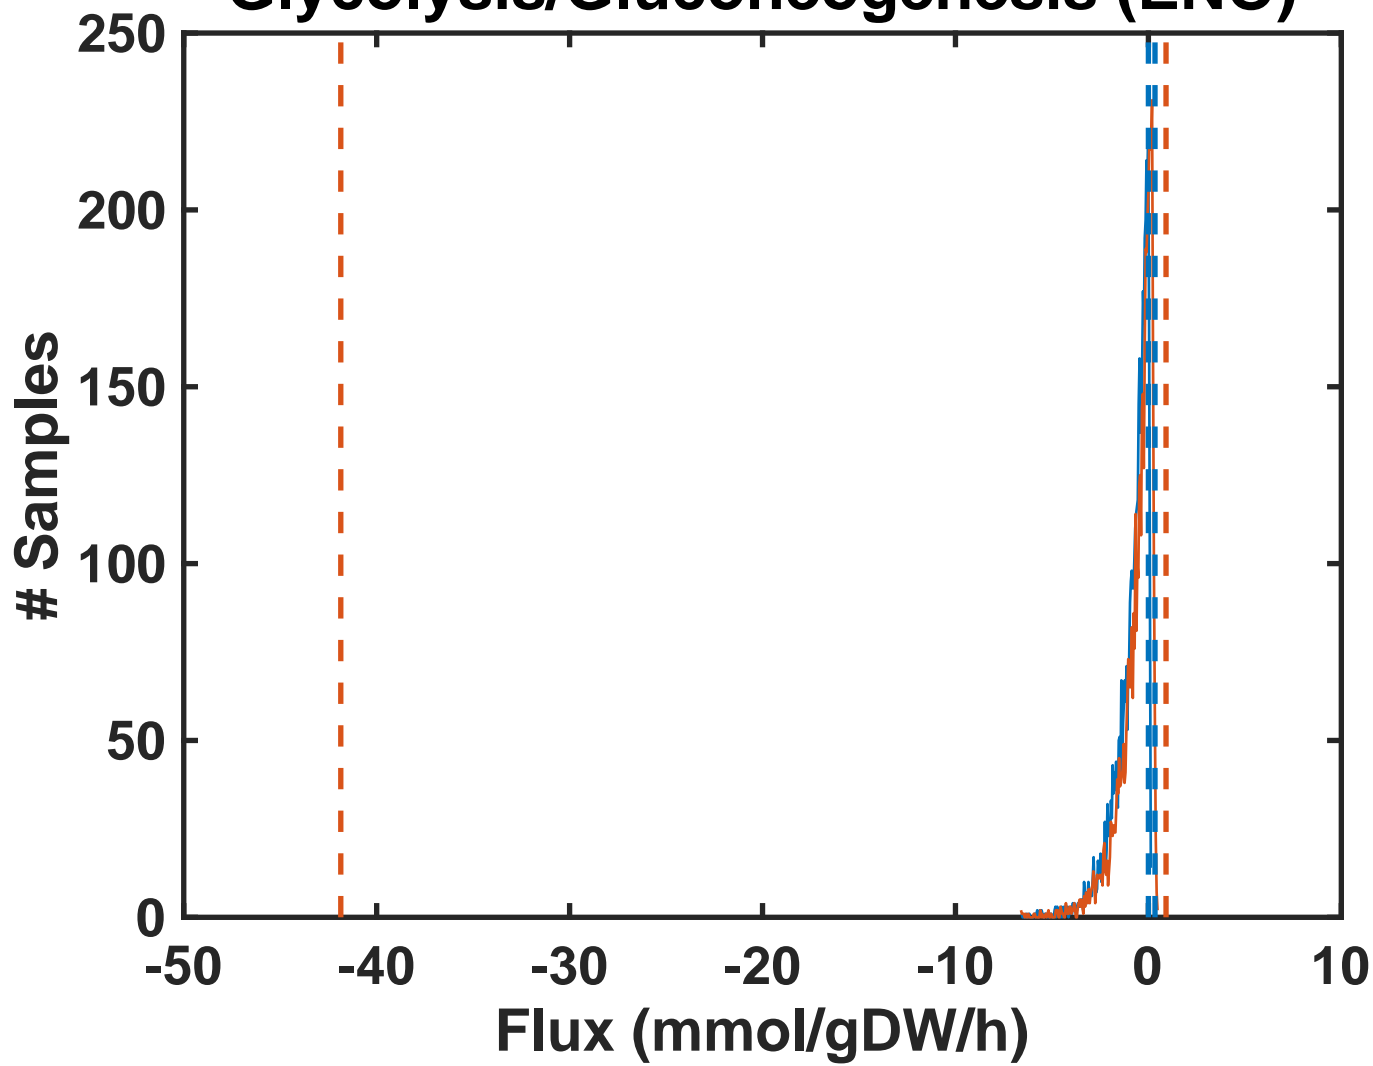

Supplement: s1 [file s1]

## Arginine and Proline Metabolism (CBPS)

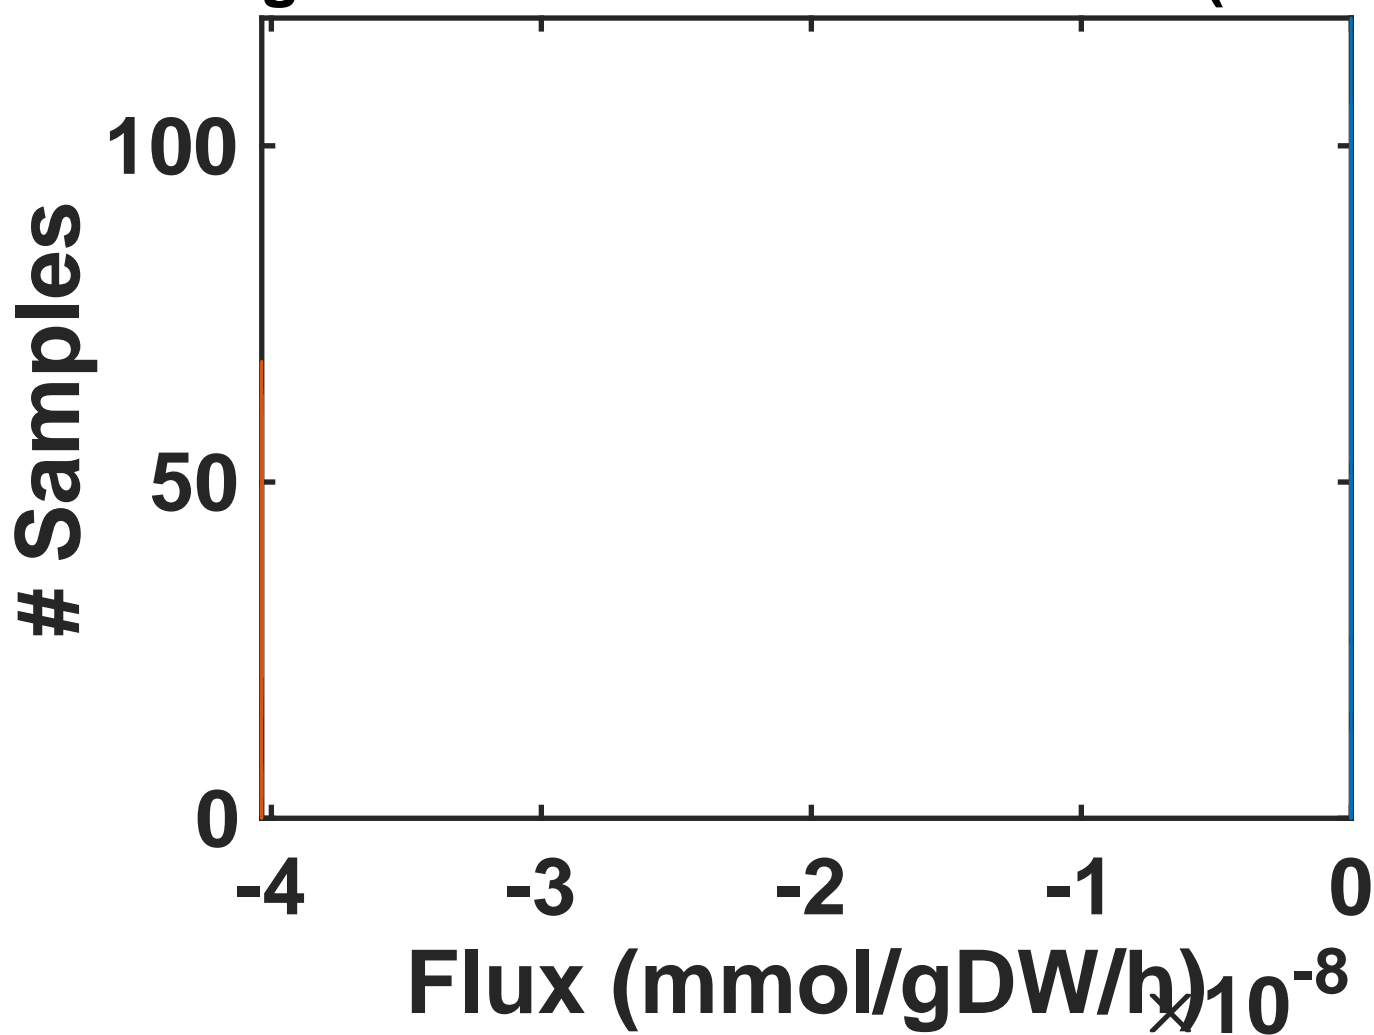

Supplement: s1 [file s1]

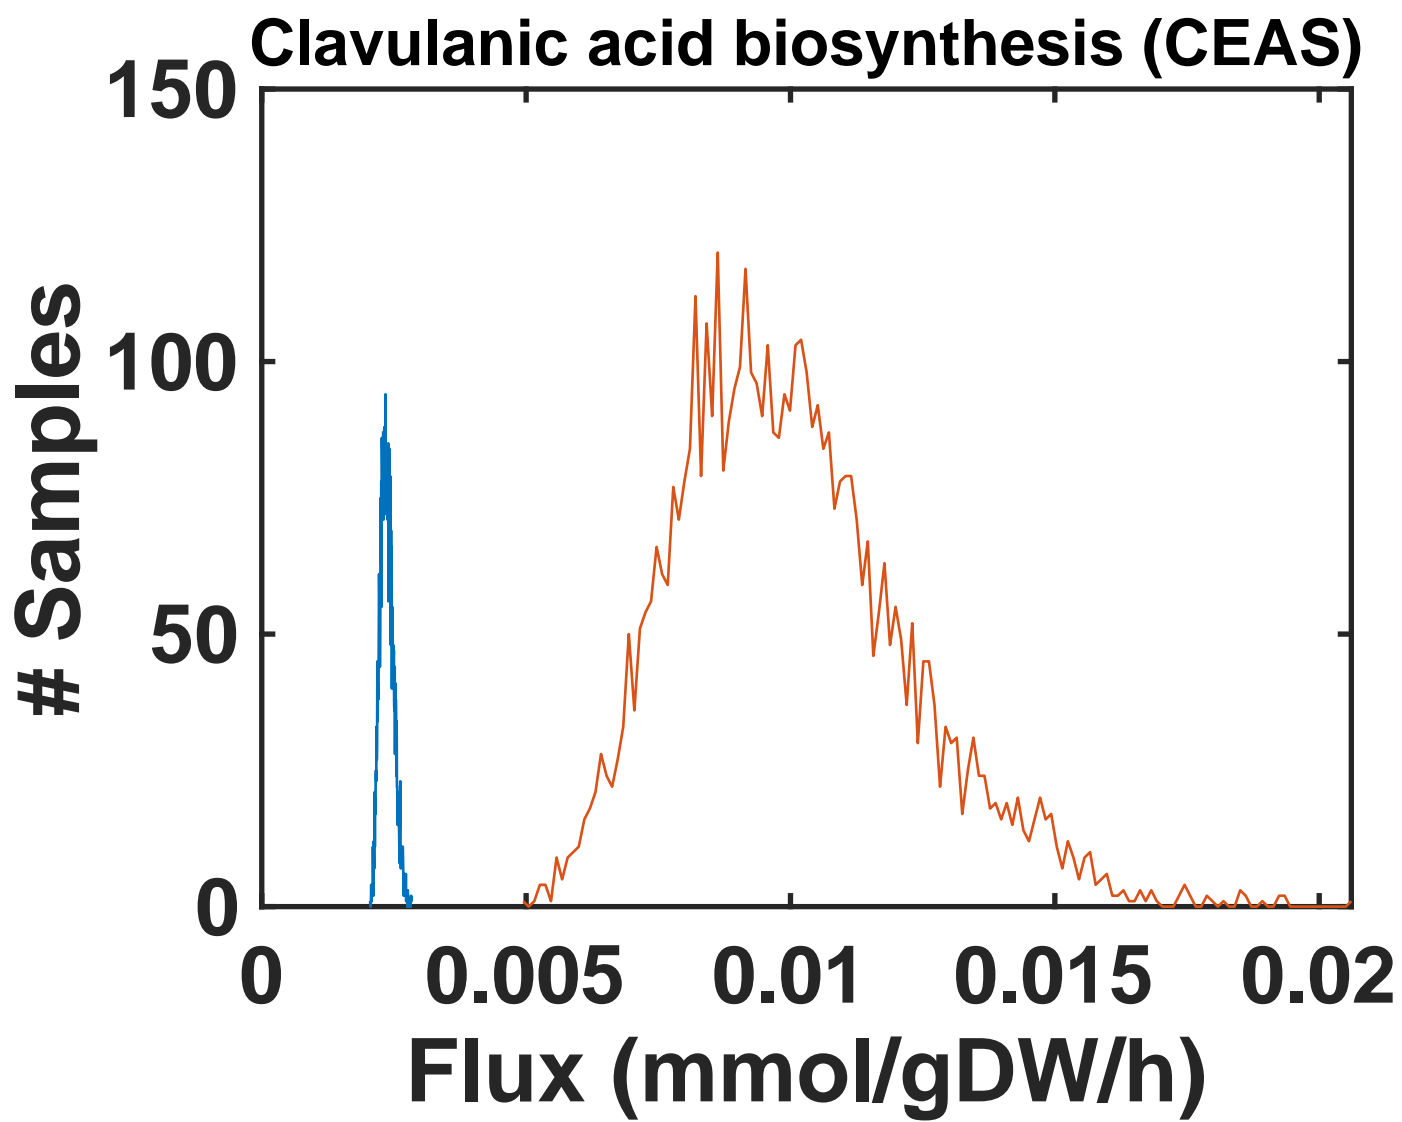

Supplement: s1 [file s1]

# Pentose Phosphate Pathway (G6PDH2r)

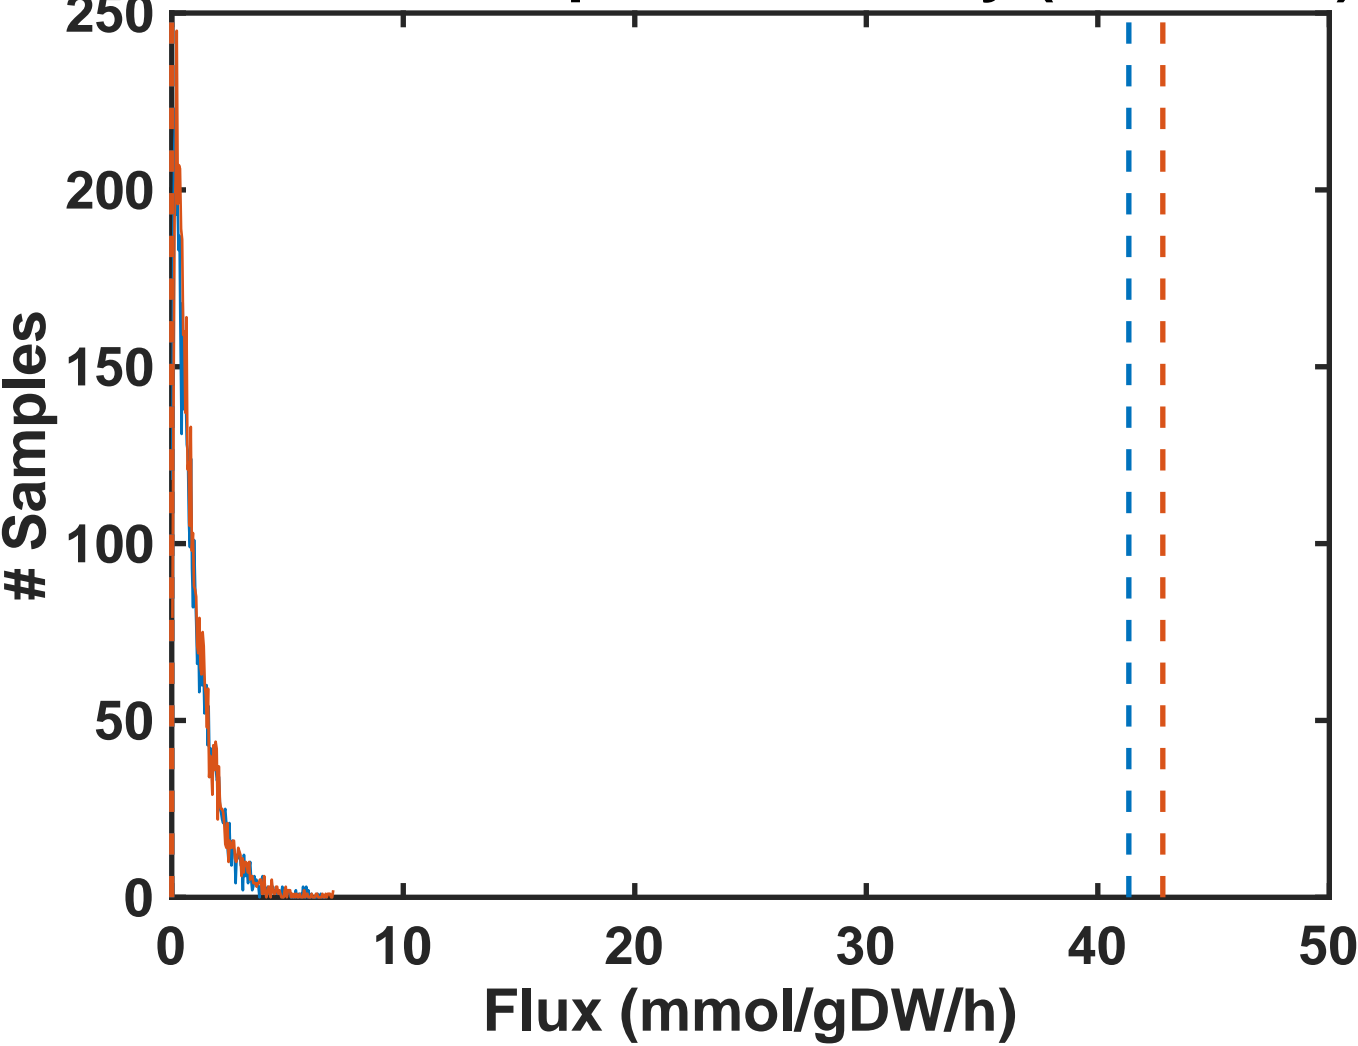

Supplement: s1 [file s1]

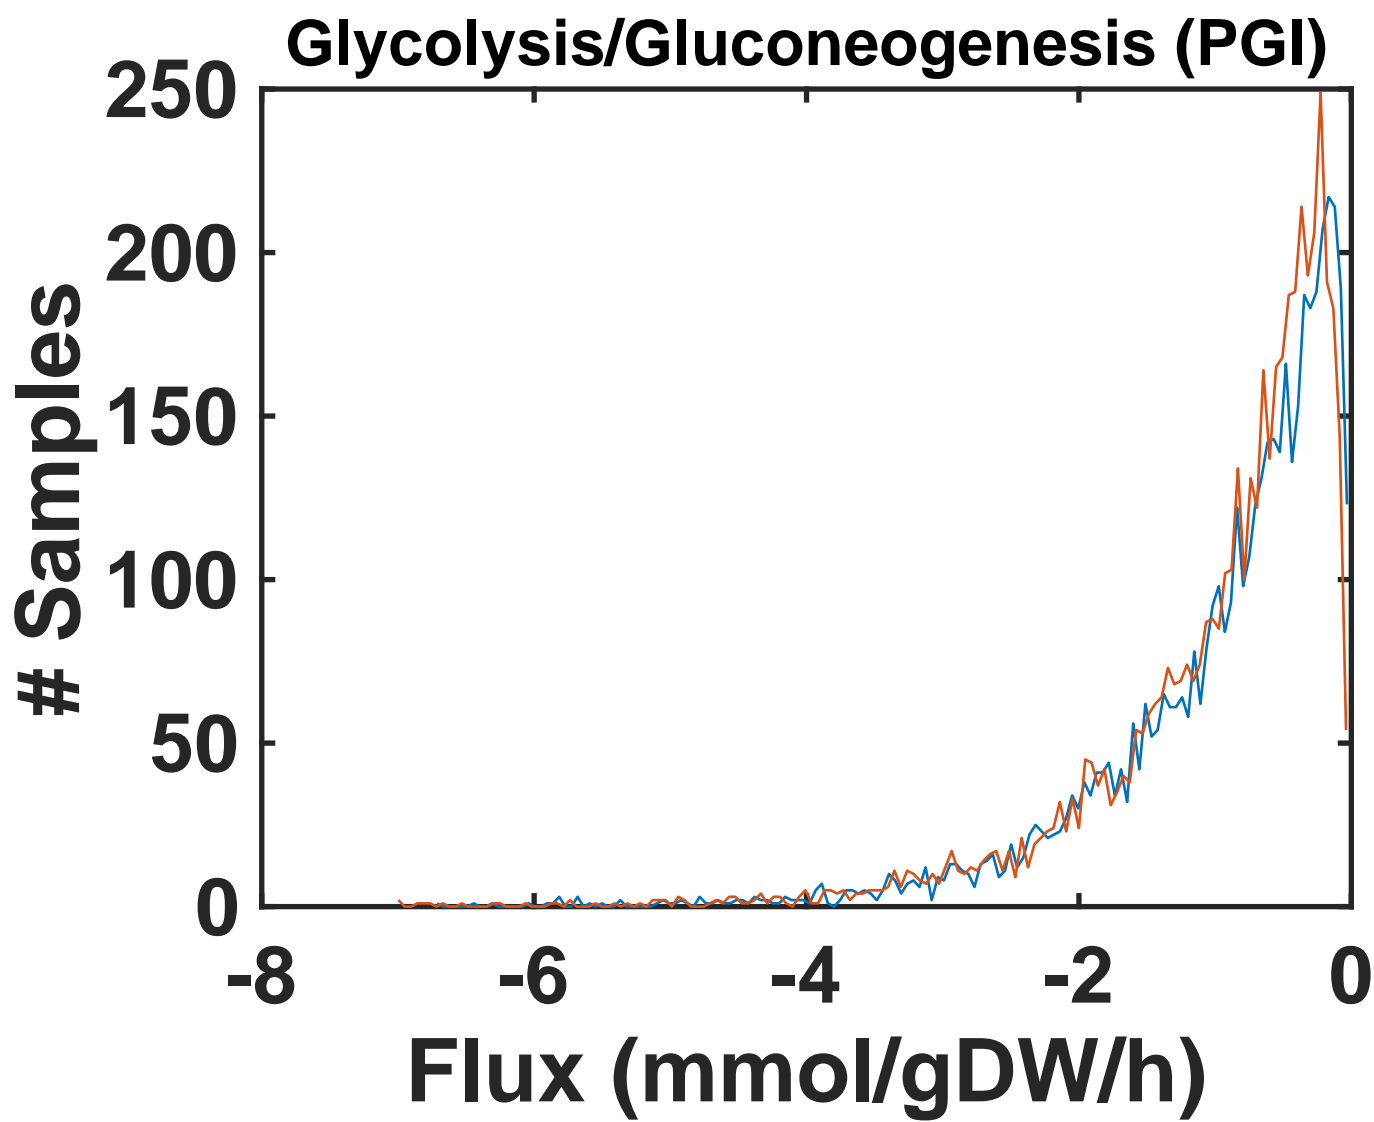

Supplement: s1 [file s1]

## Citric Acid Cycle (CITL)

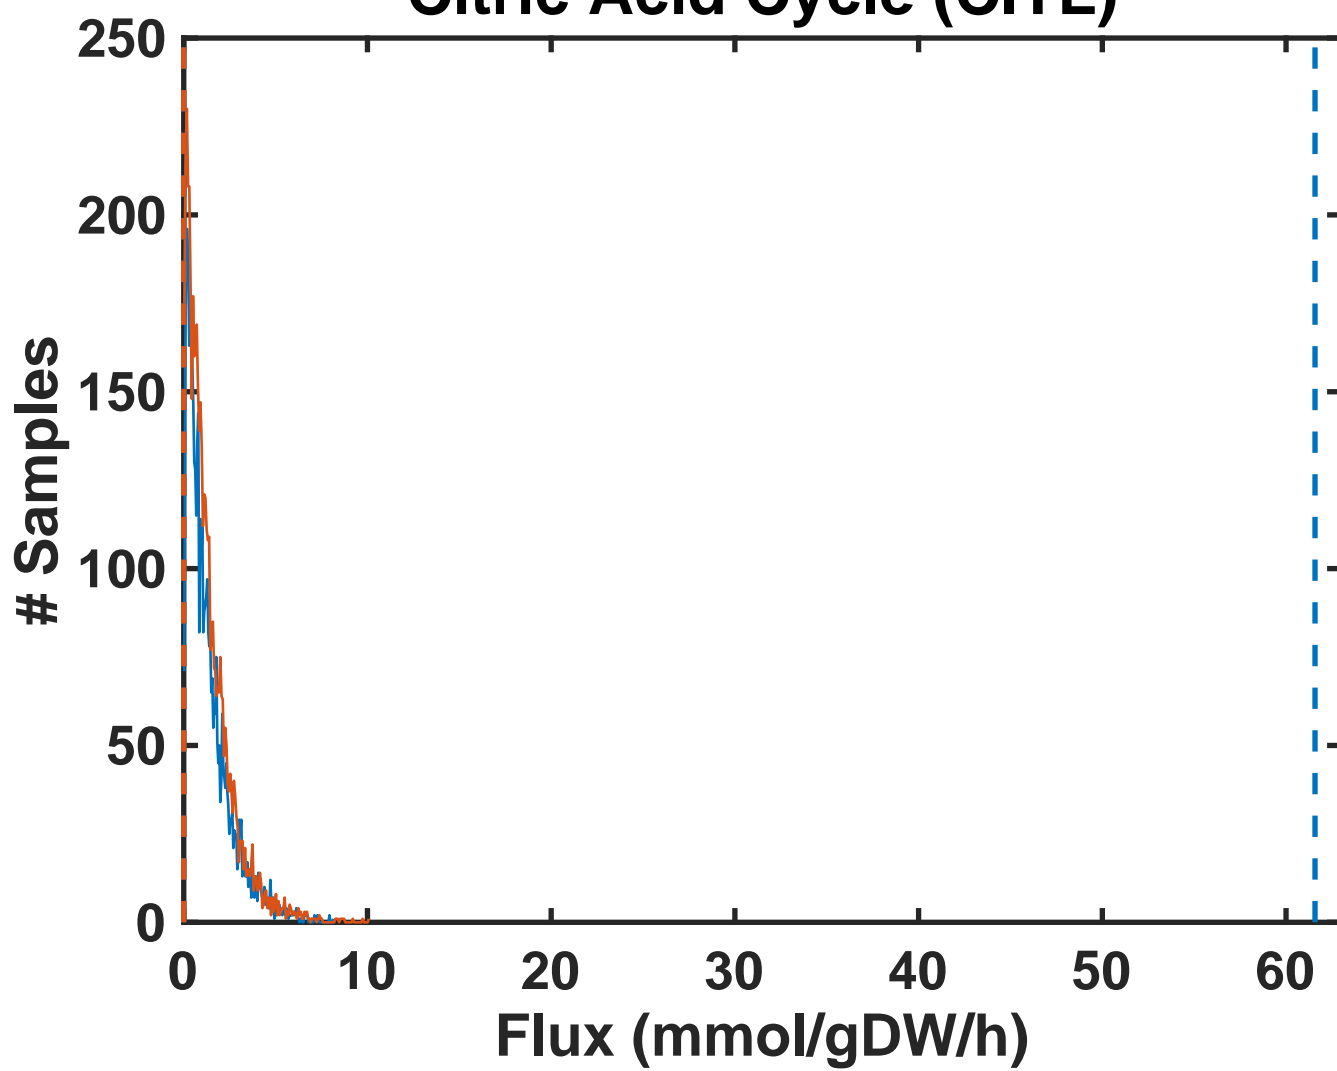

Supplement: s1 [file s1]

## Glycolysis/Gluconeogenesis (FBA)

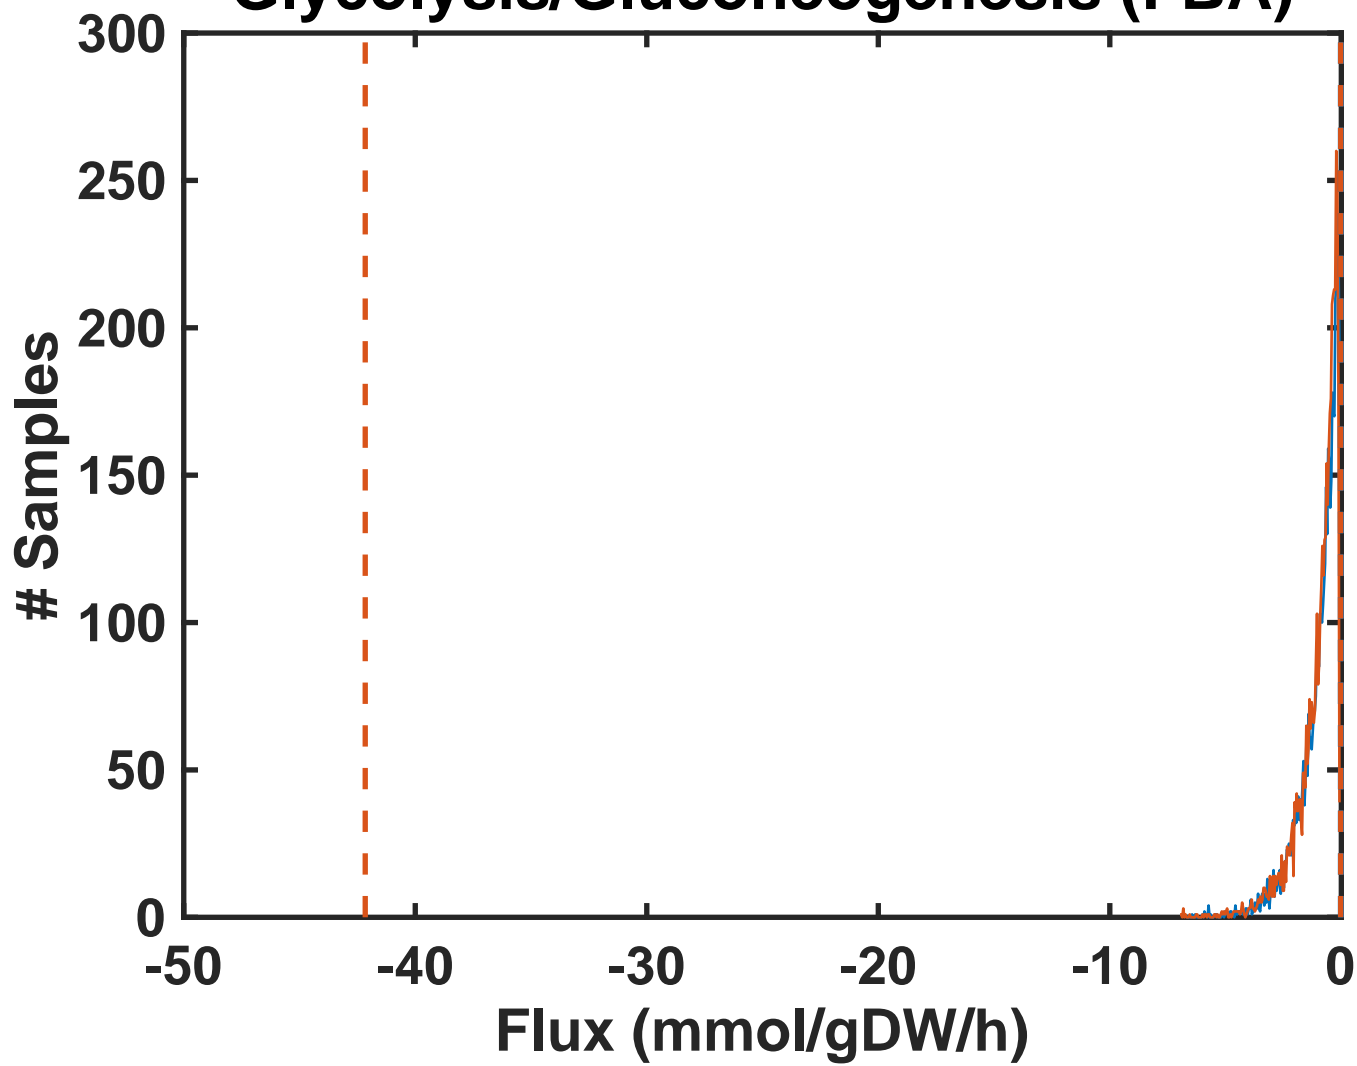

Supplement: s1 [file s1]

## Pentose Phosphate Pathway (RPE)

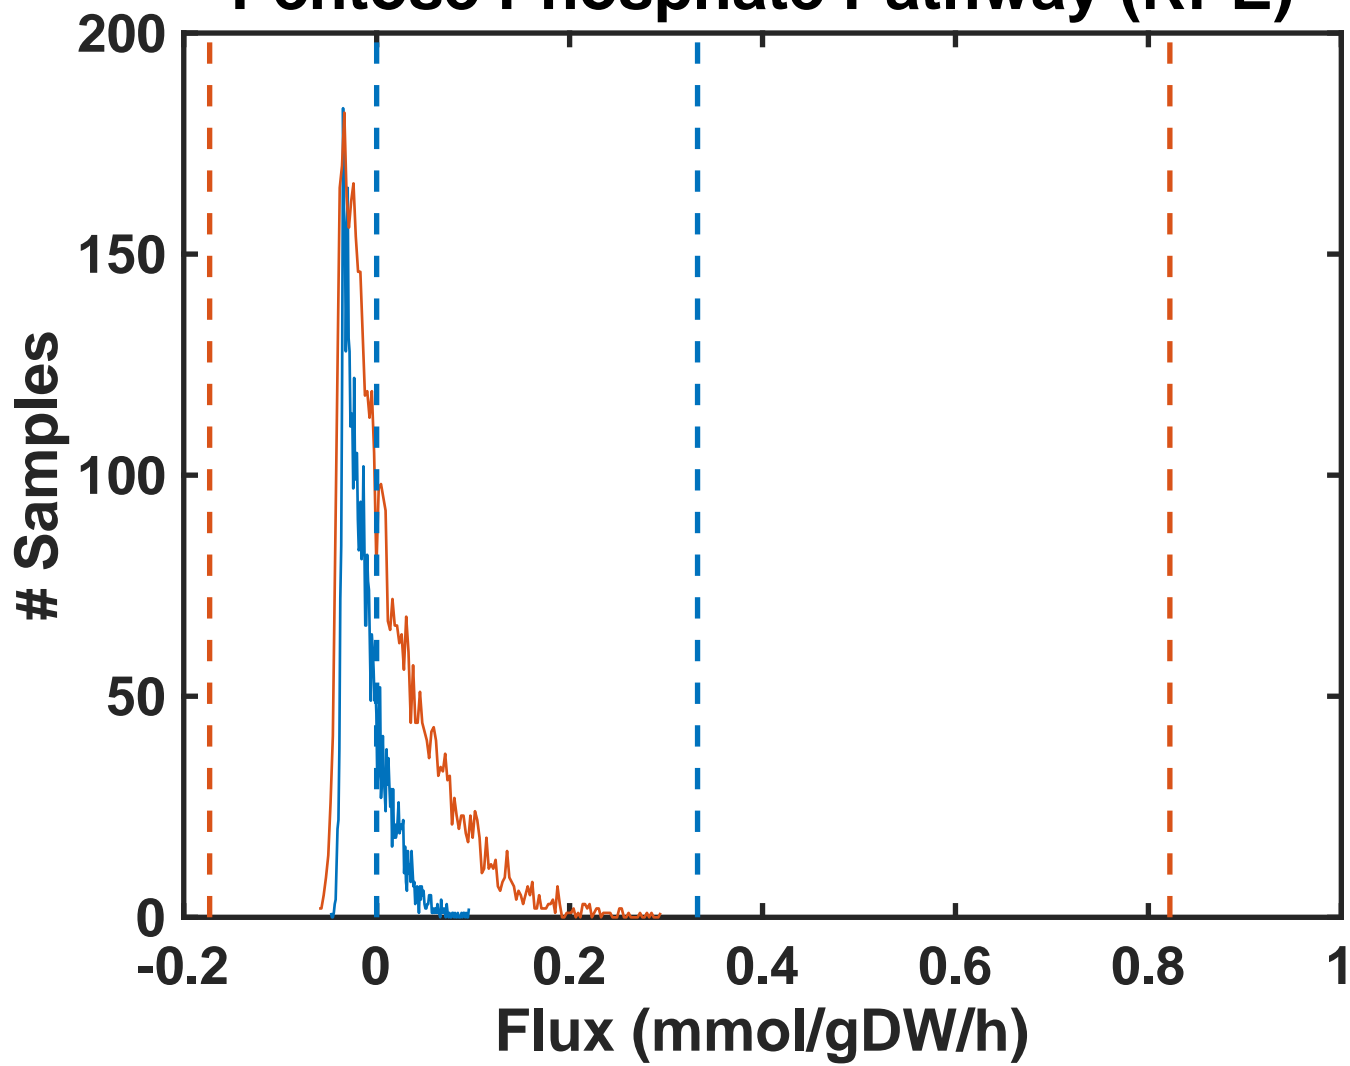

Supplement: s1 [file s1]

## Anaplerotic Reactions (ME2)

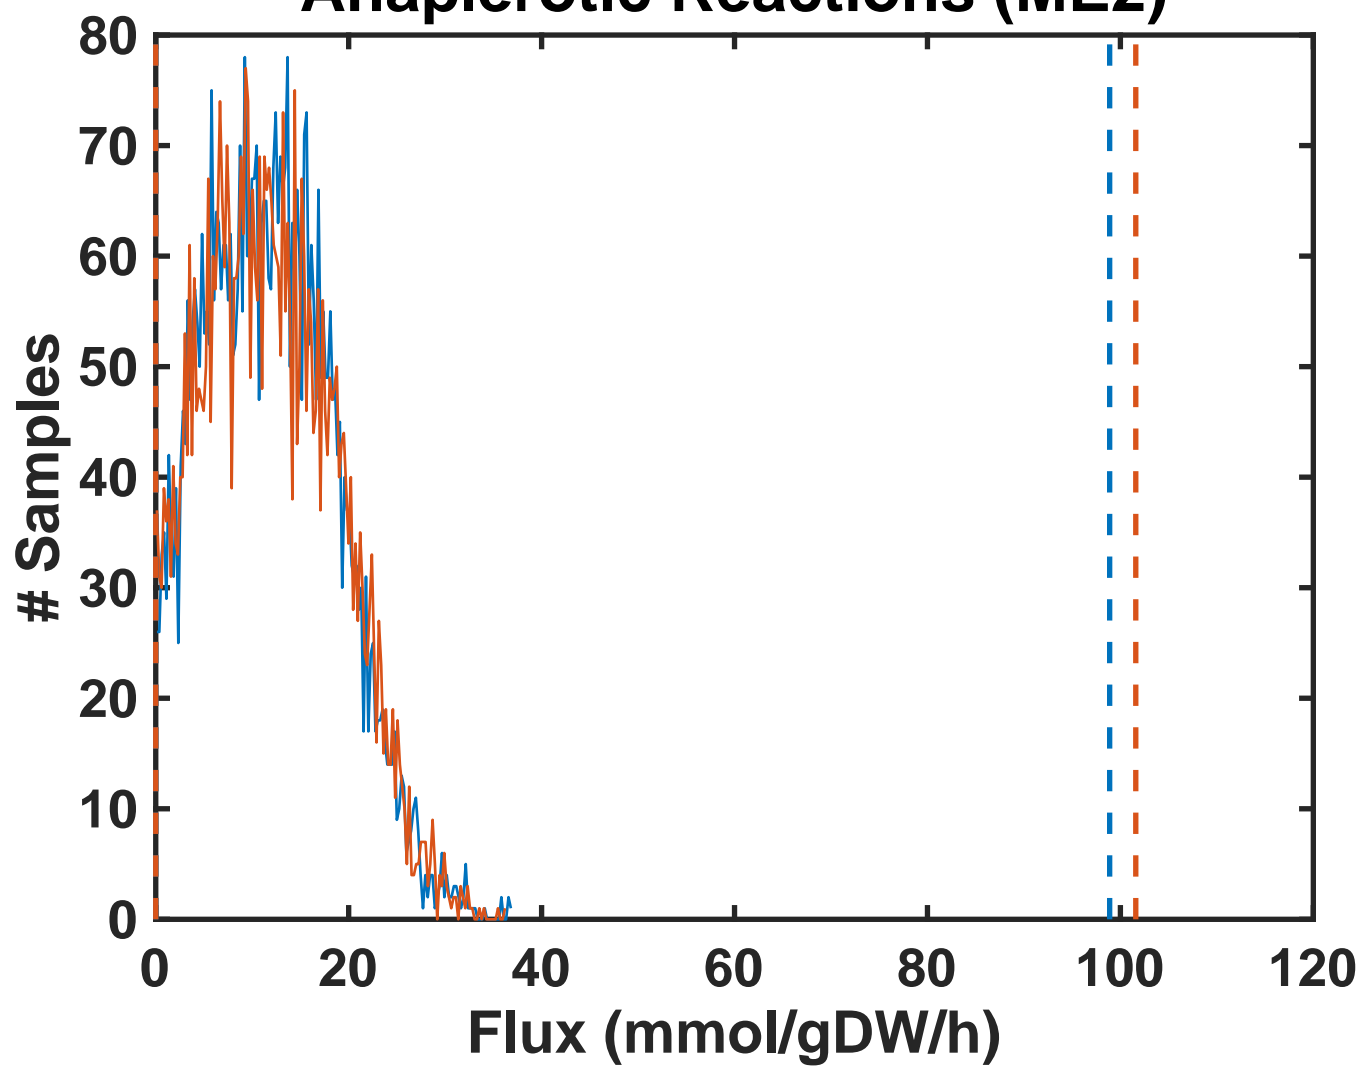

Supplement: s1 [file s1]

## Citric Acid Cycle (MDH2)

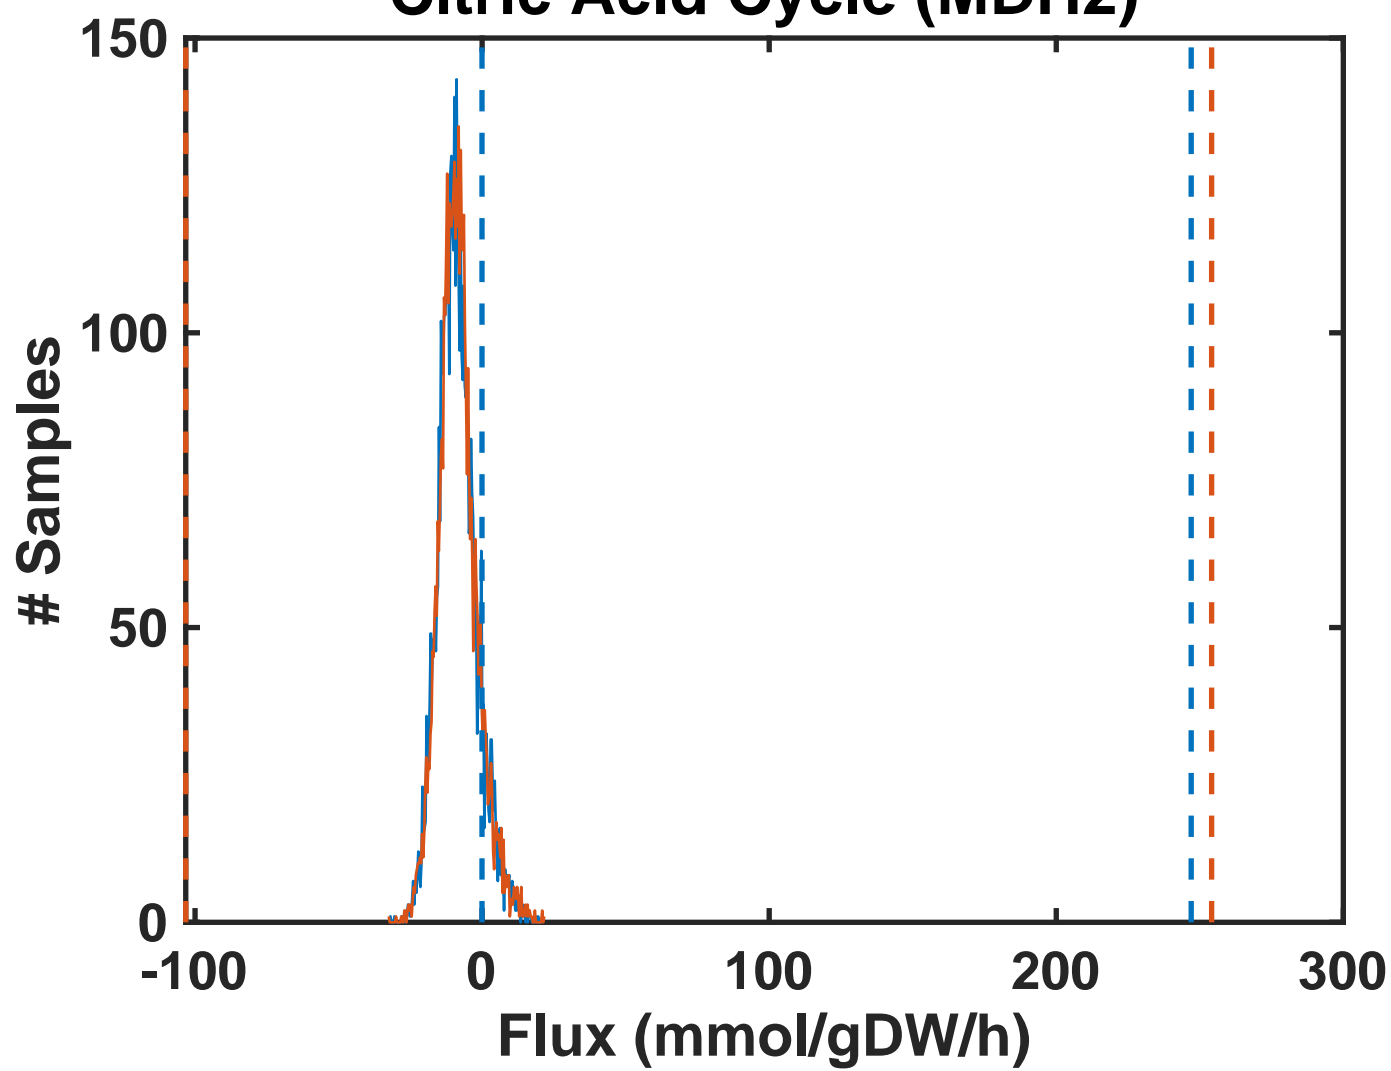

Supplement: s1 [file s1]

## Anaplerotic Reactions (ICL)

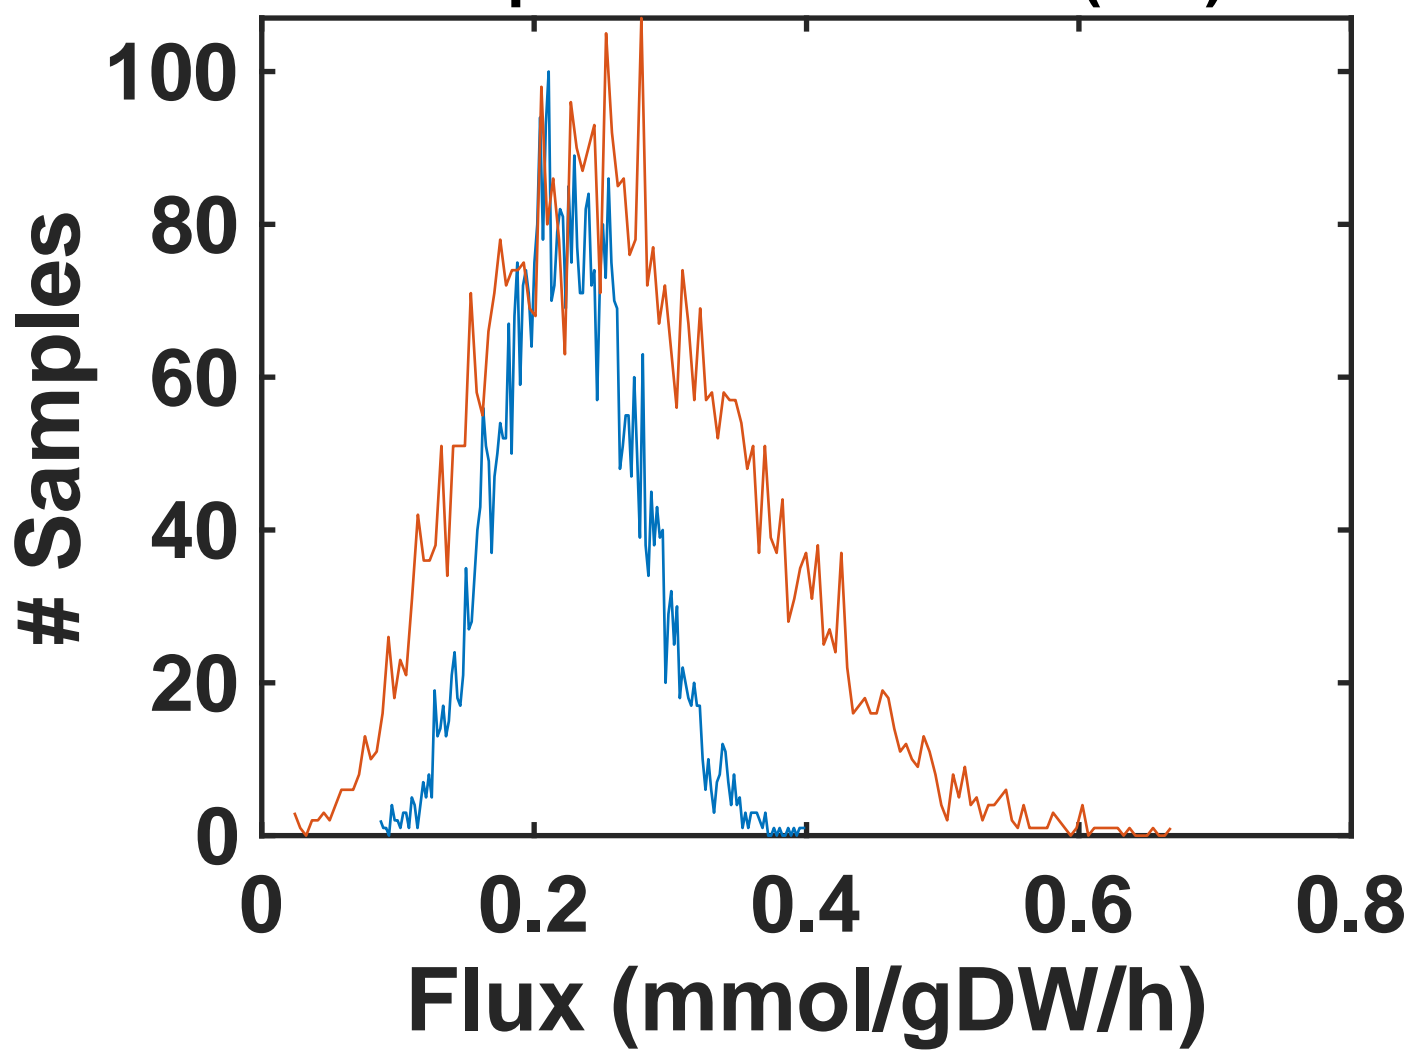

Supplement: s1 [file s1]

## Glycolysis/Gluconeogenesis (PGK)

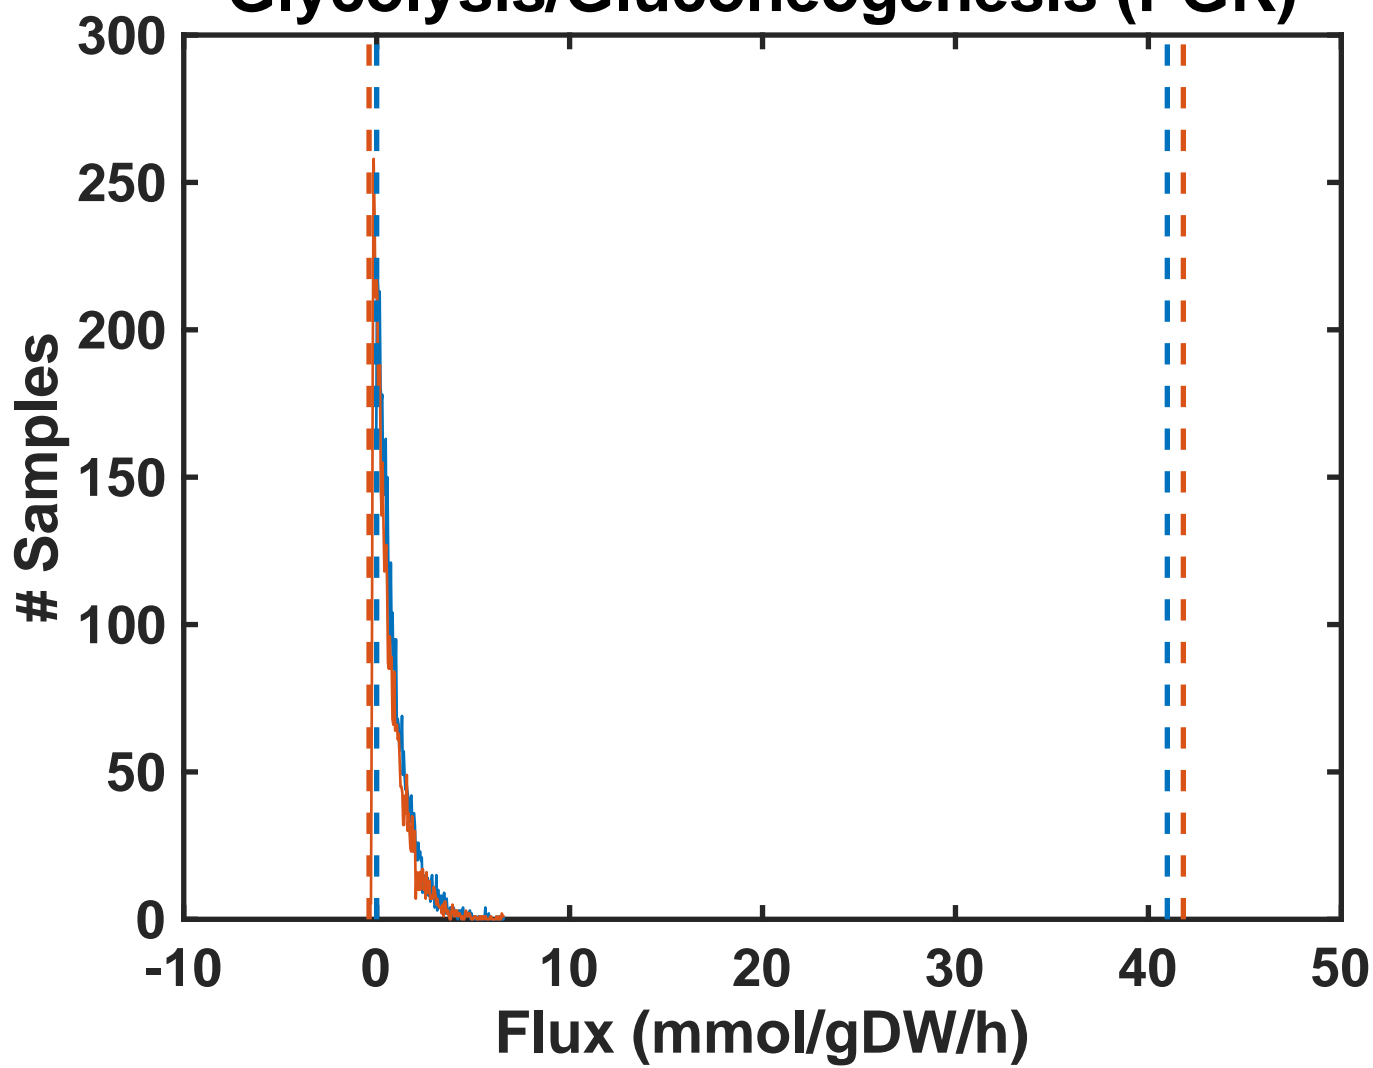

Supplement: s1 [file s1]

## Arginine and Proline Metabolism (CBPS)

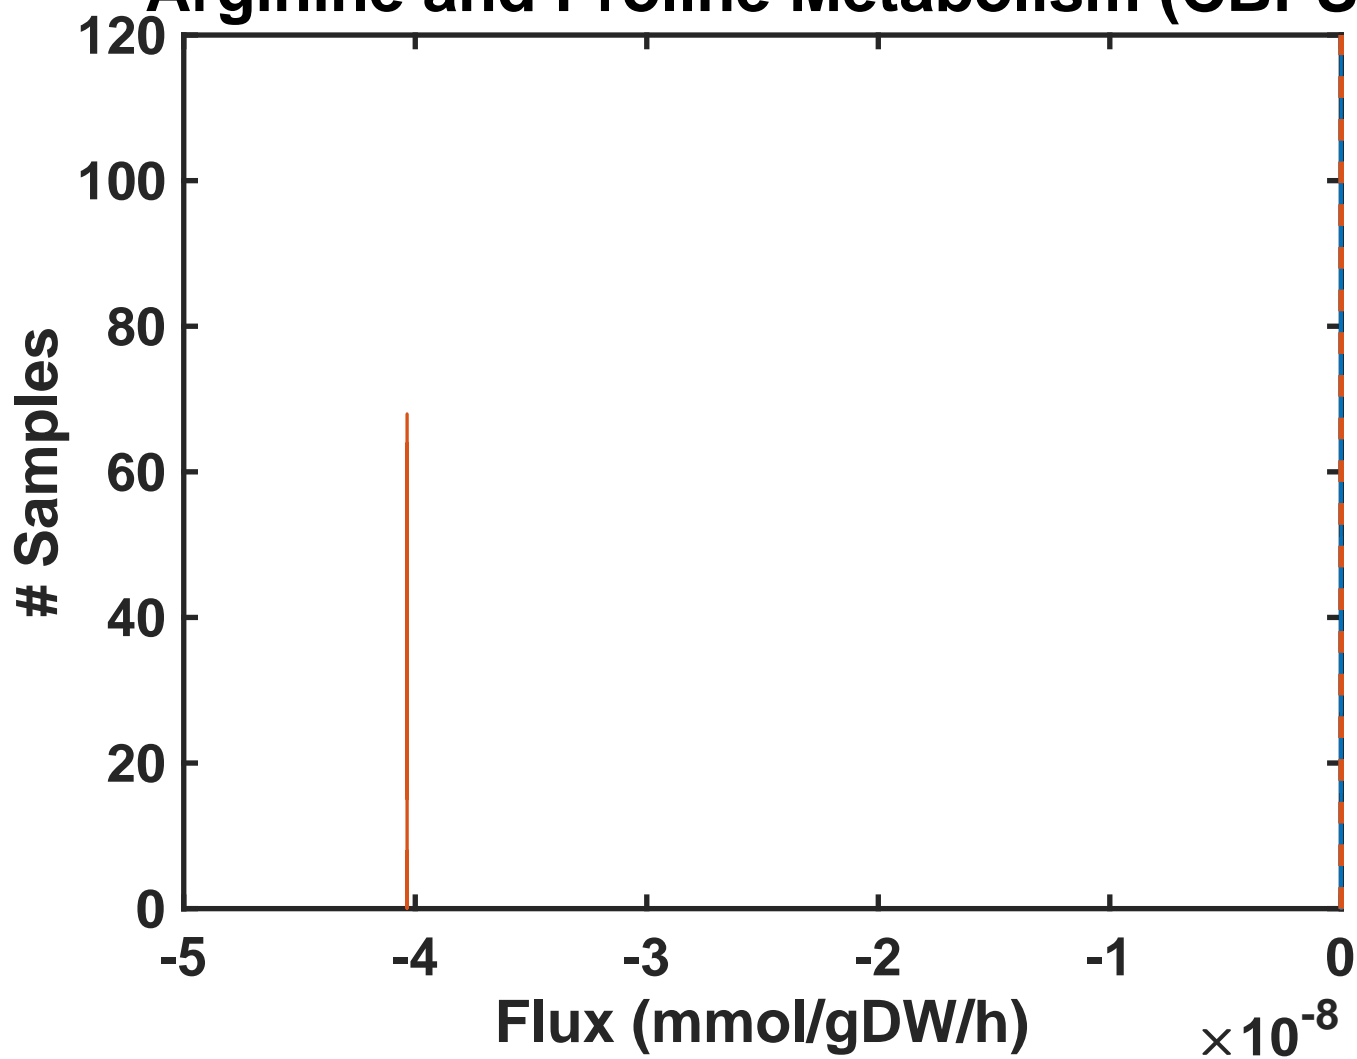

Supplement: s1 [file s1]

## Citric Acid Cycle (MDH)

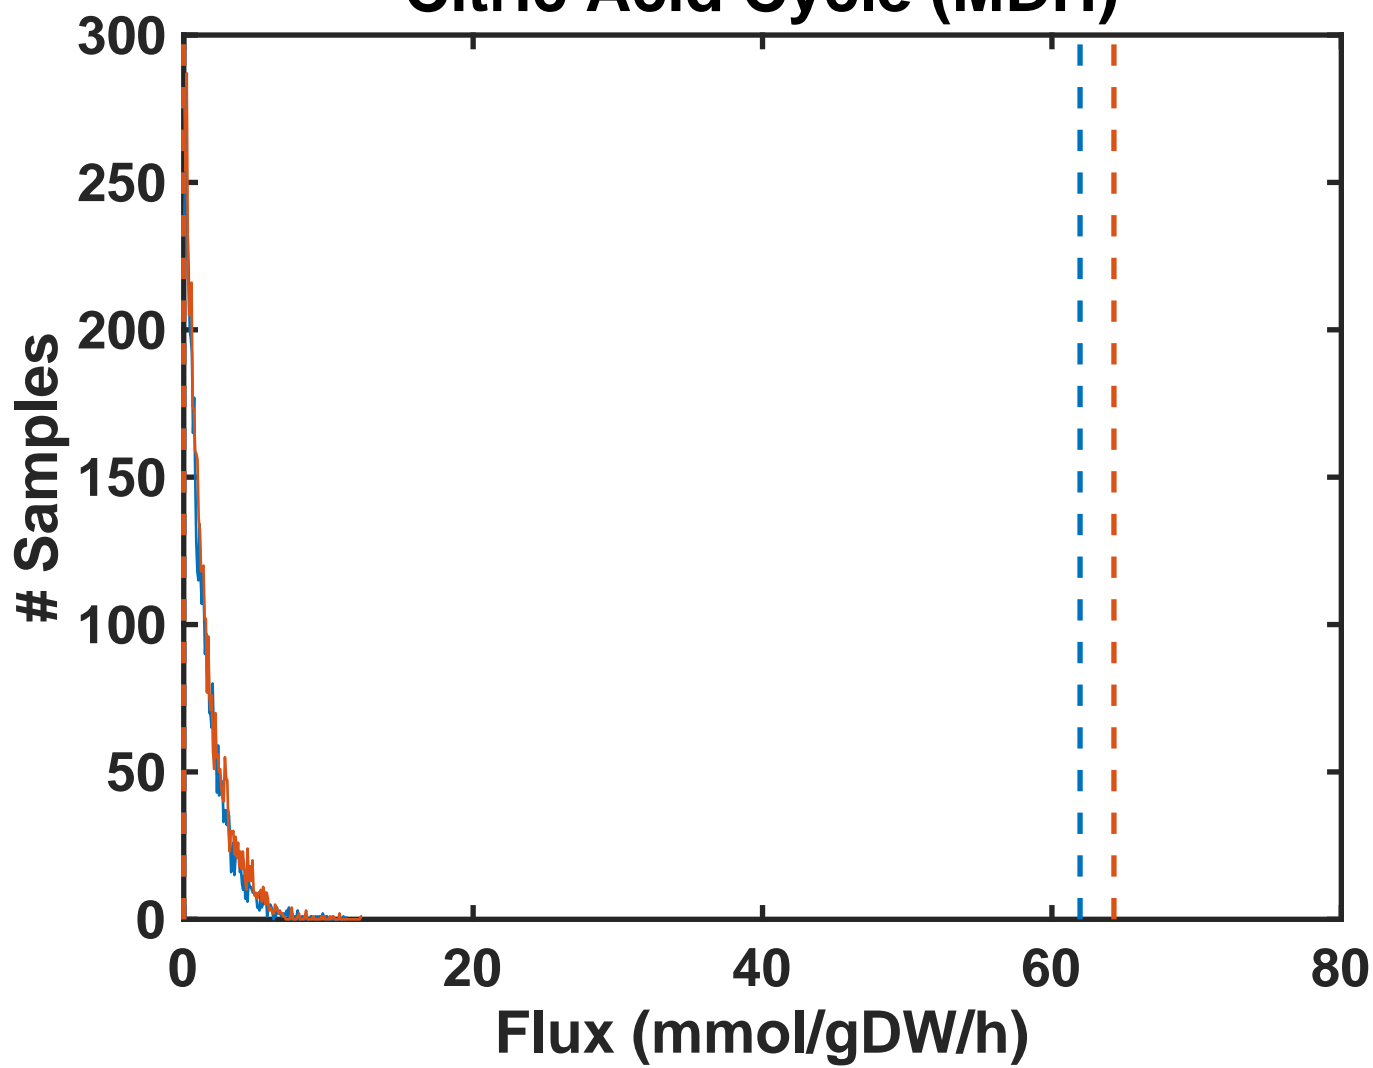

Supplement: s1 [file s1]

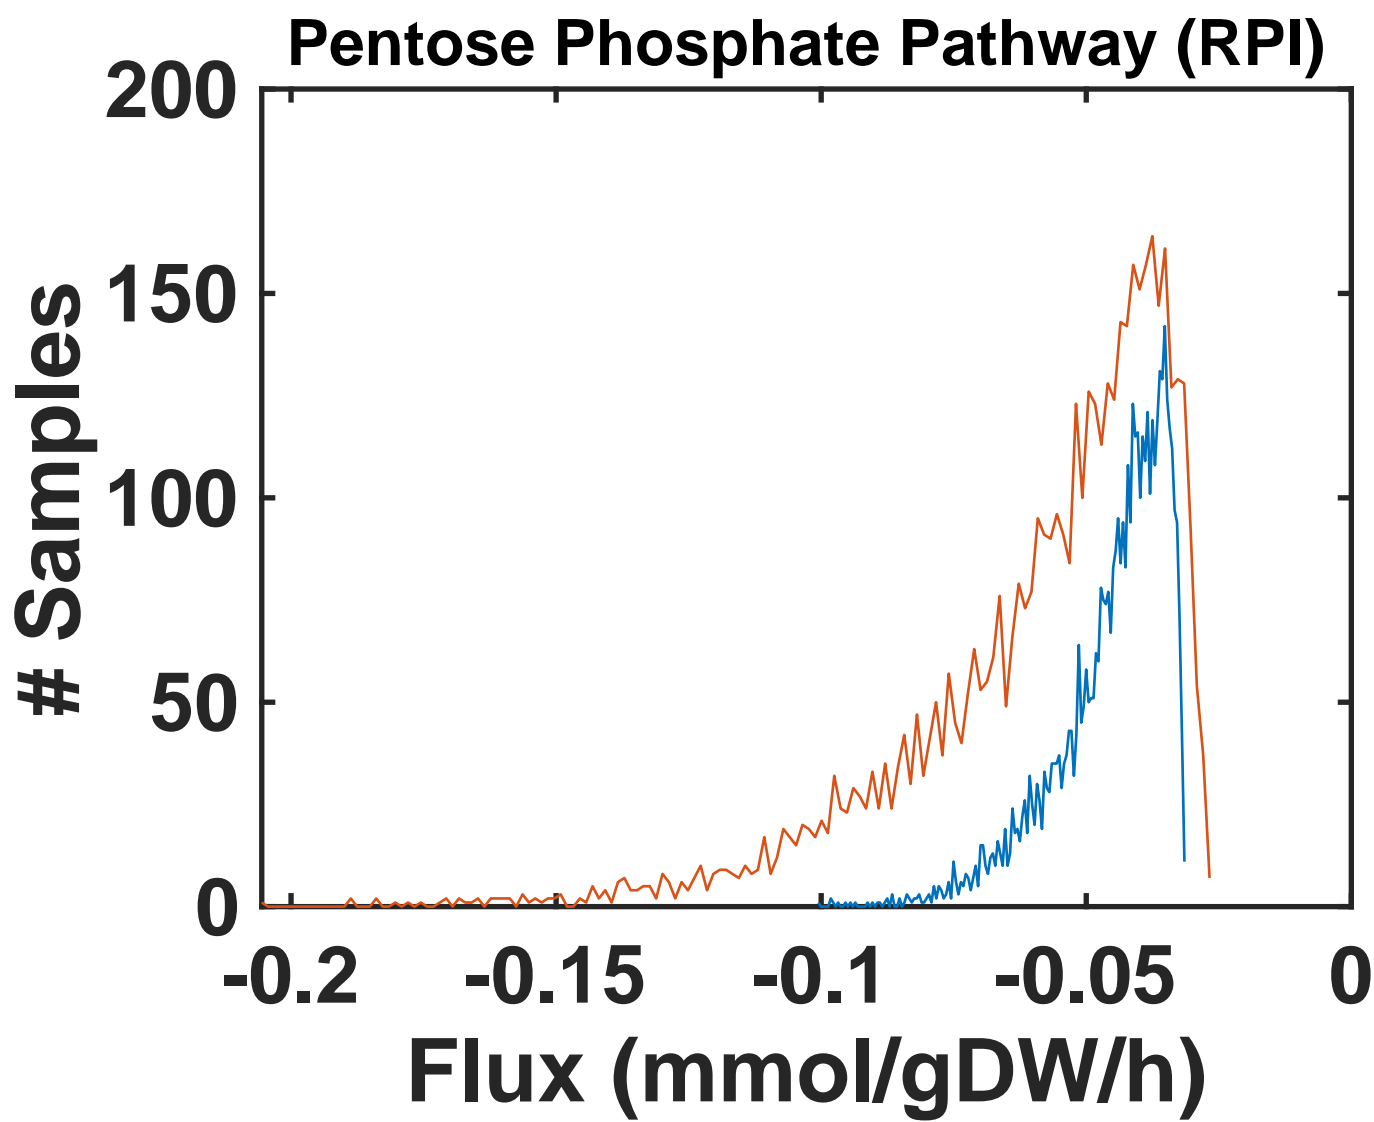

Supplement: s1 [file s1]

## Anaplerotic Reactions (ME1)

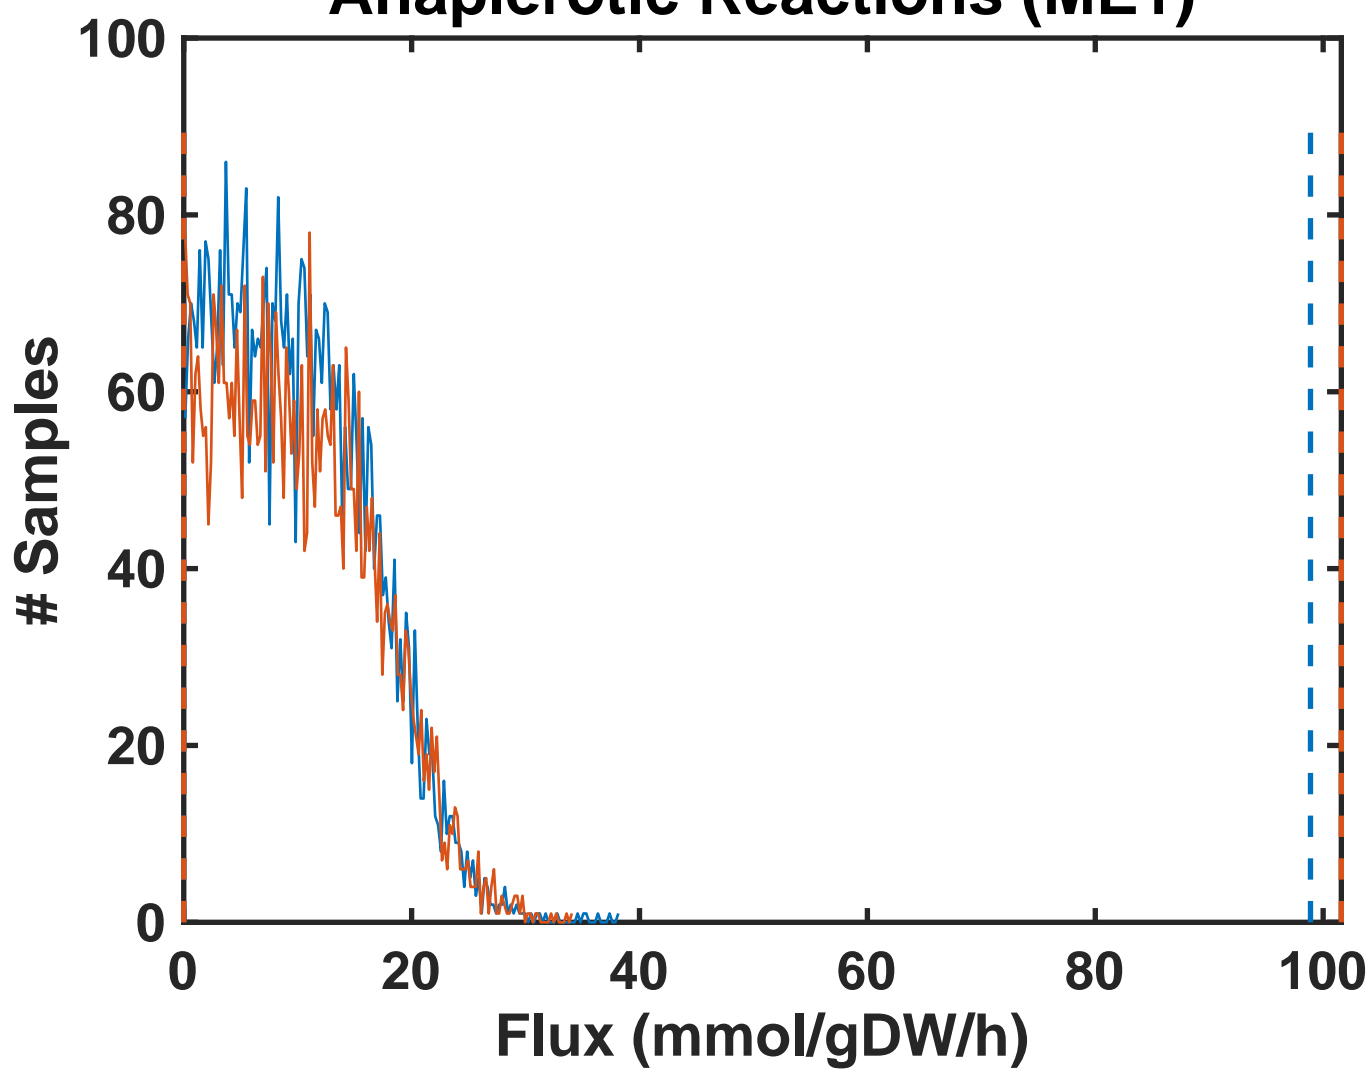

Supplement: s1 [file s1]

Exchange ( $EX_{pe}$ )

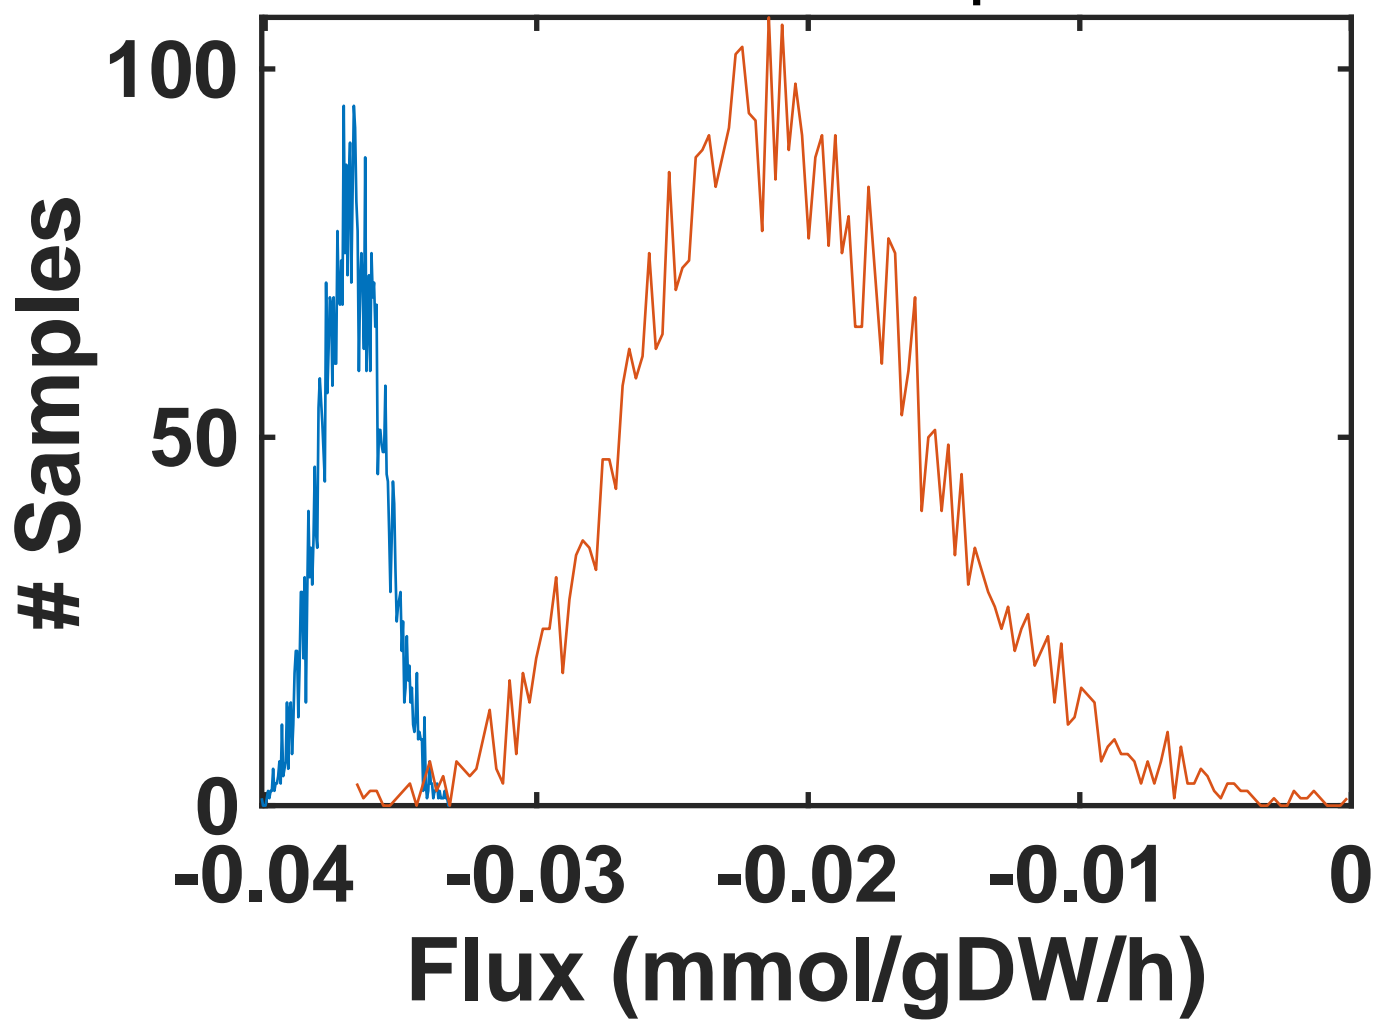

Supplement: s1 [file s1]

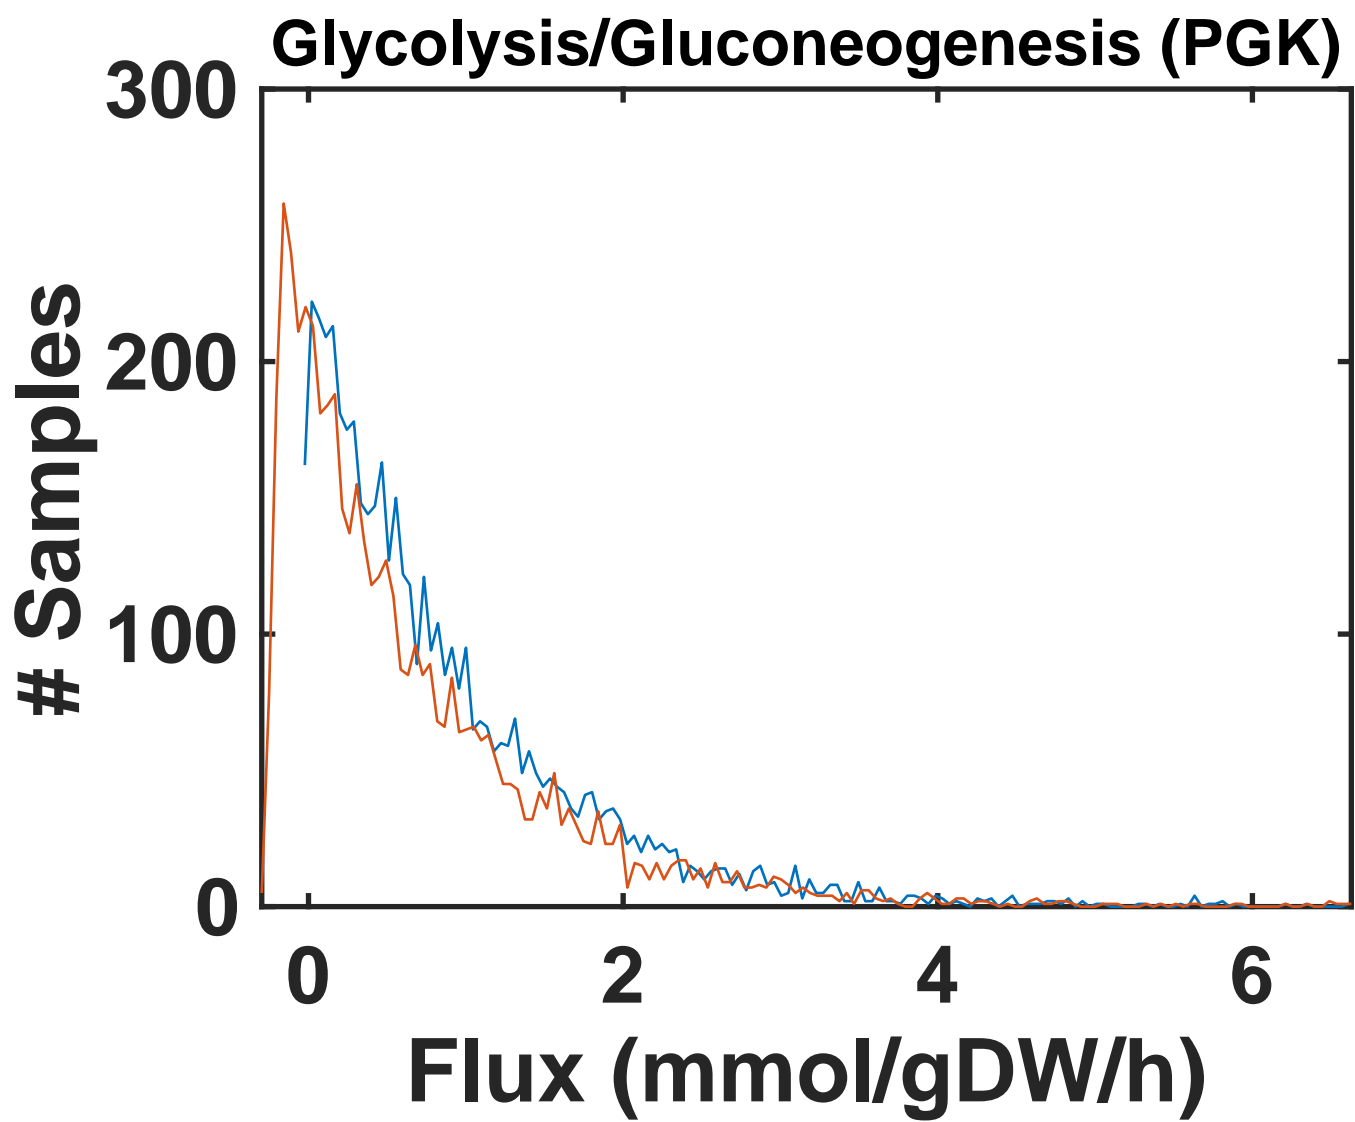

Supplement: s1 [file s1]

## Pyruvate Metabolism (ACKr)

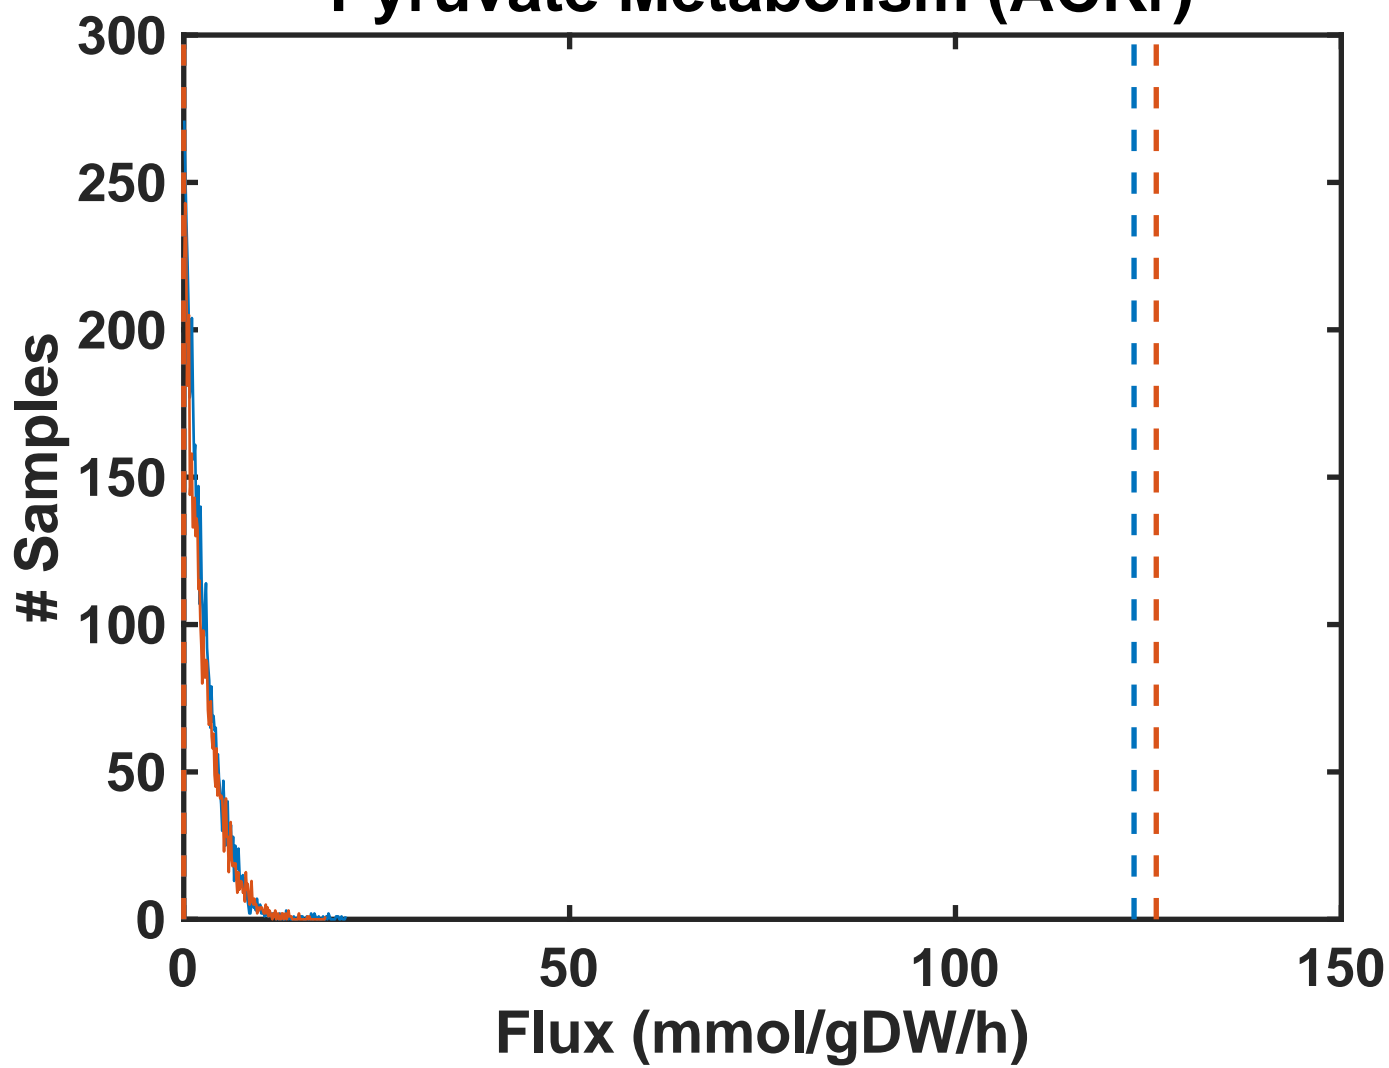

Supplement: s1 [file s1]

# Pyruvate Metabolism (ALCD2x)

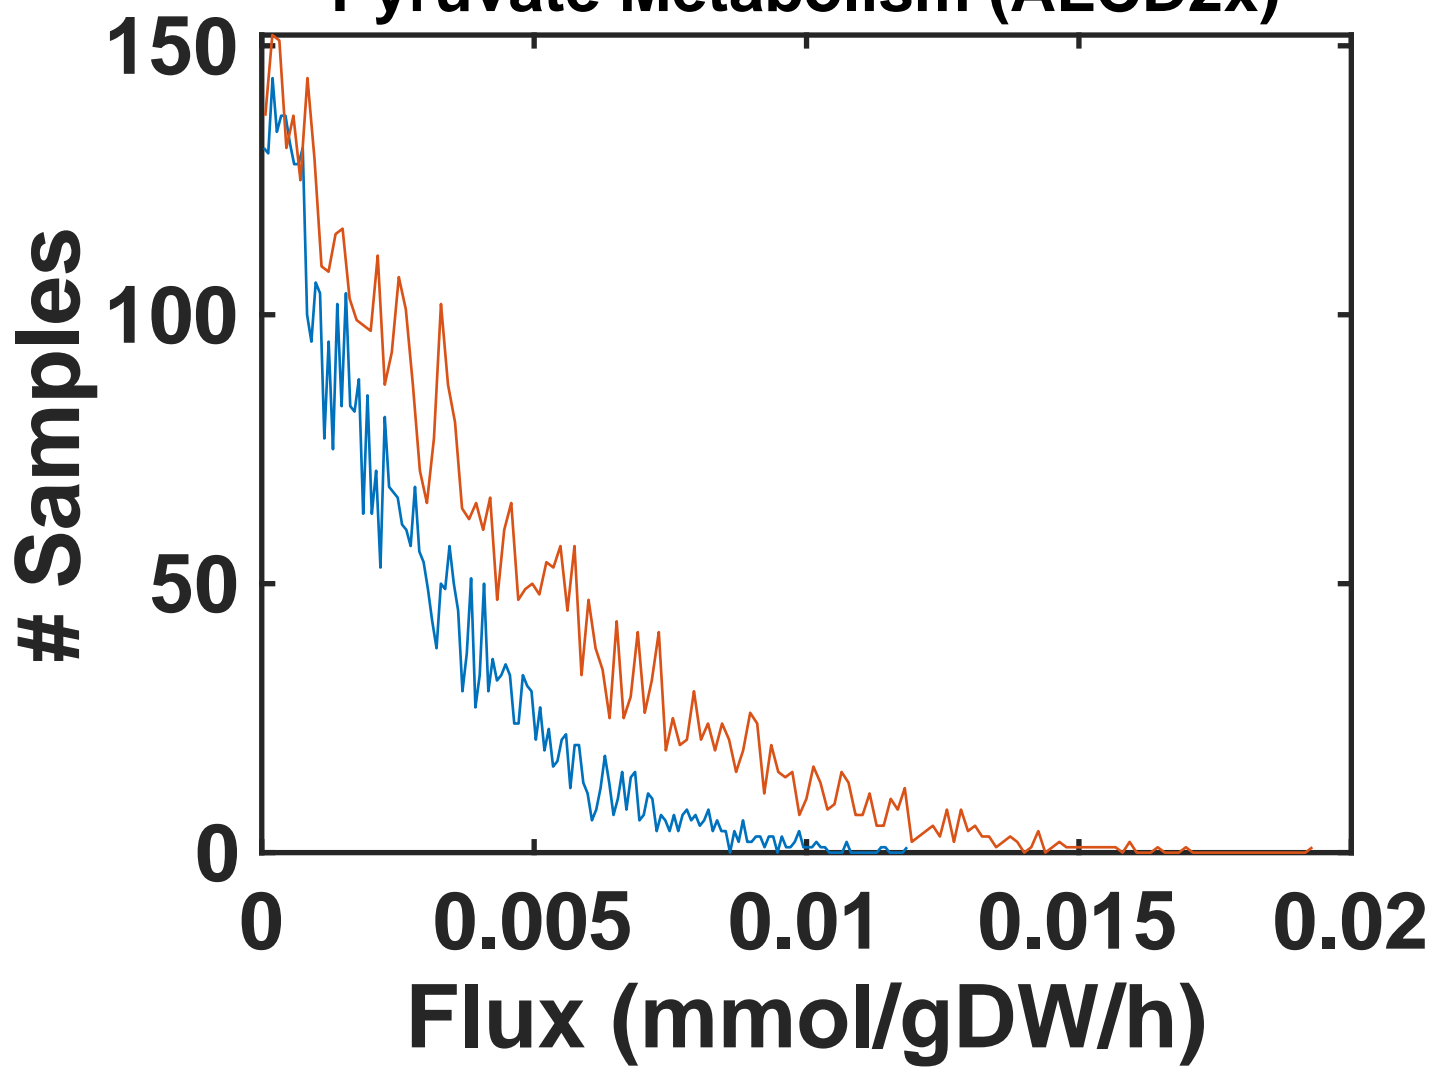

Supplement: s1 [file s1]

# Citric Acid Cycle (CS)

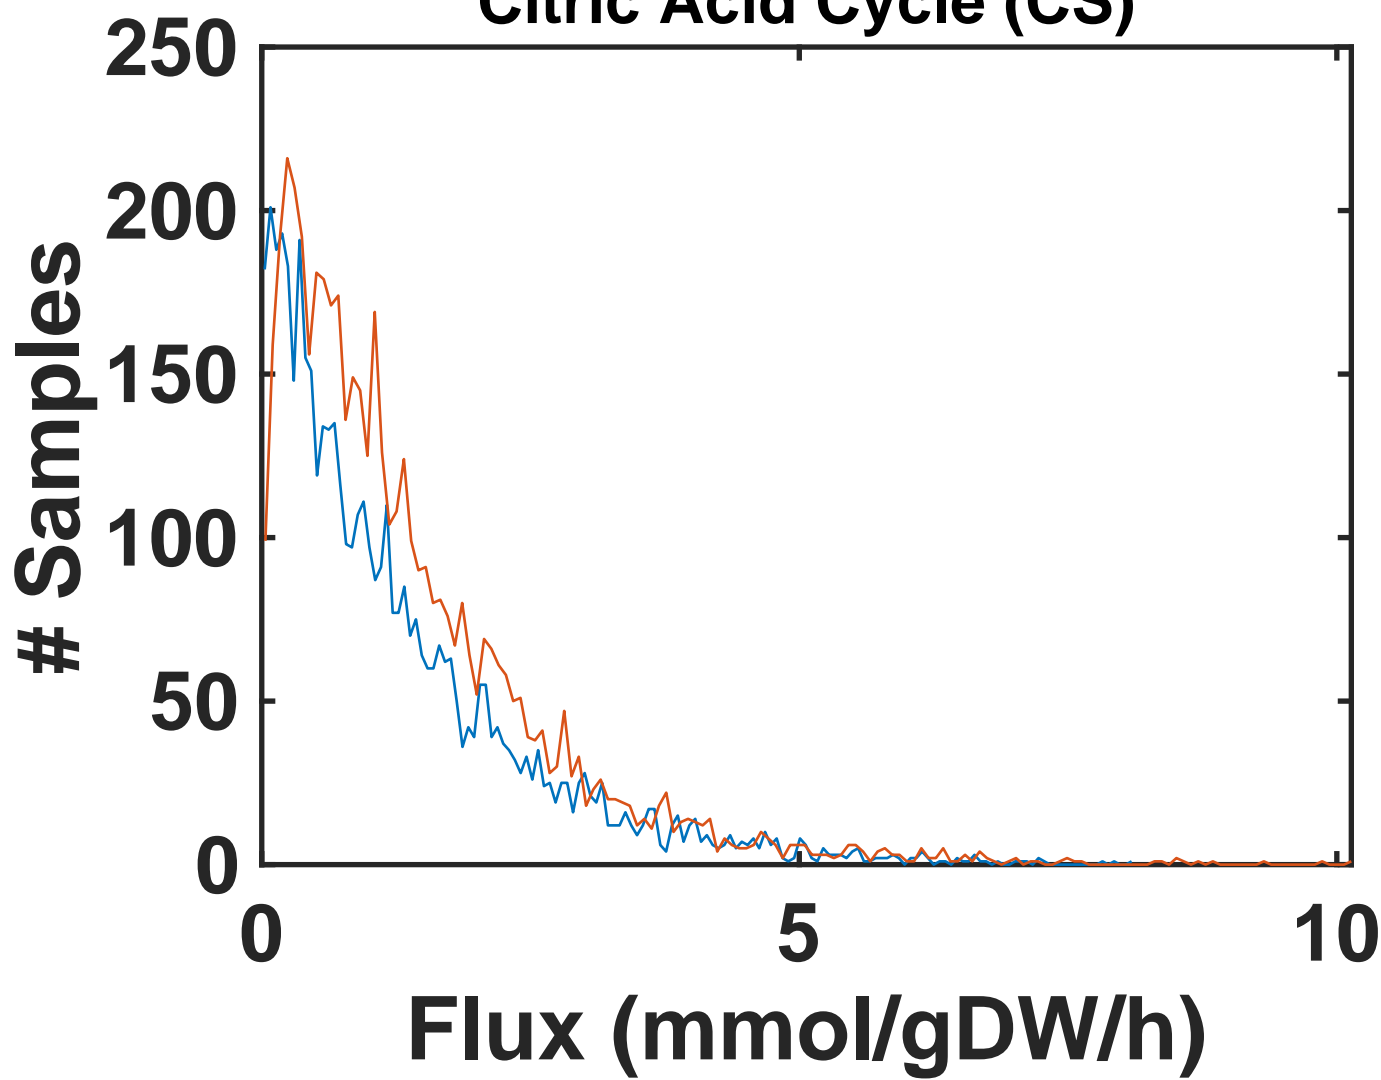

Supplement: s1 [file s1]

## Pyruvate Metabolism (PTAr)

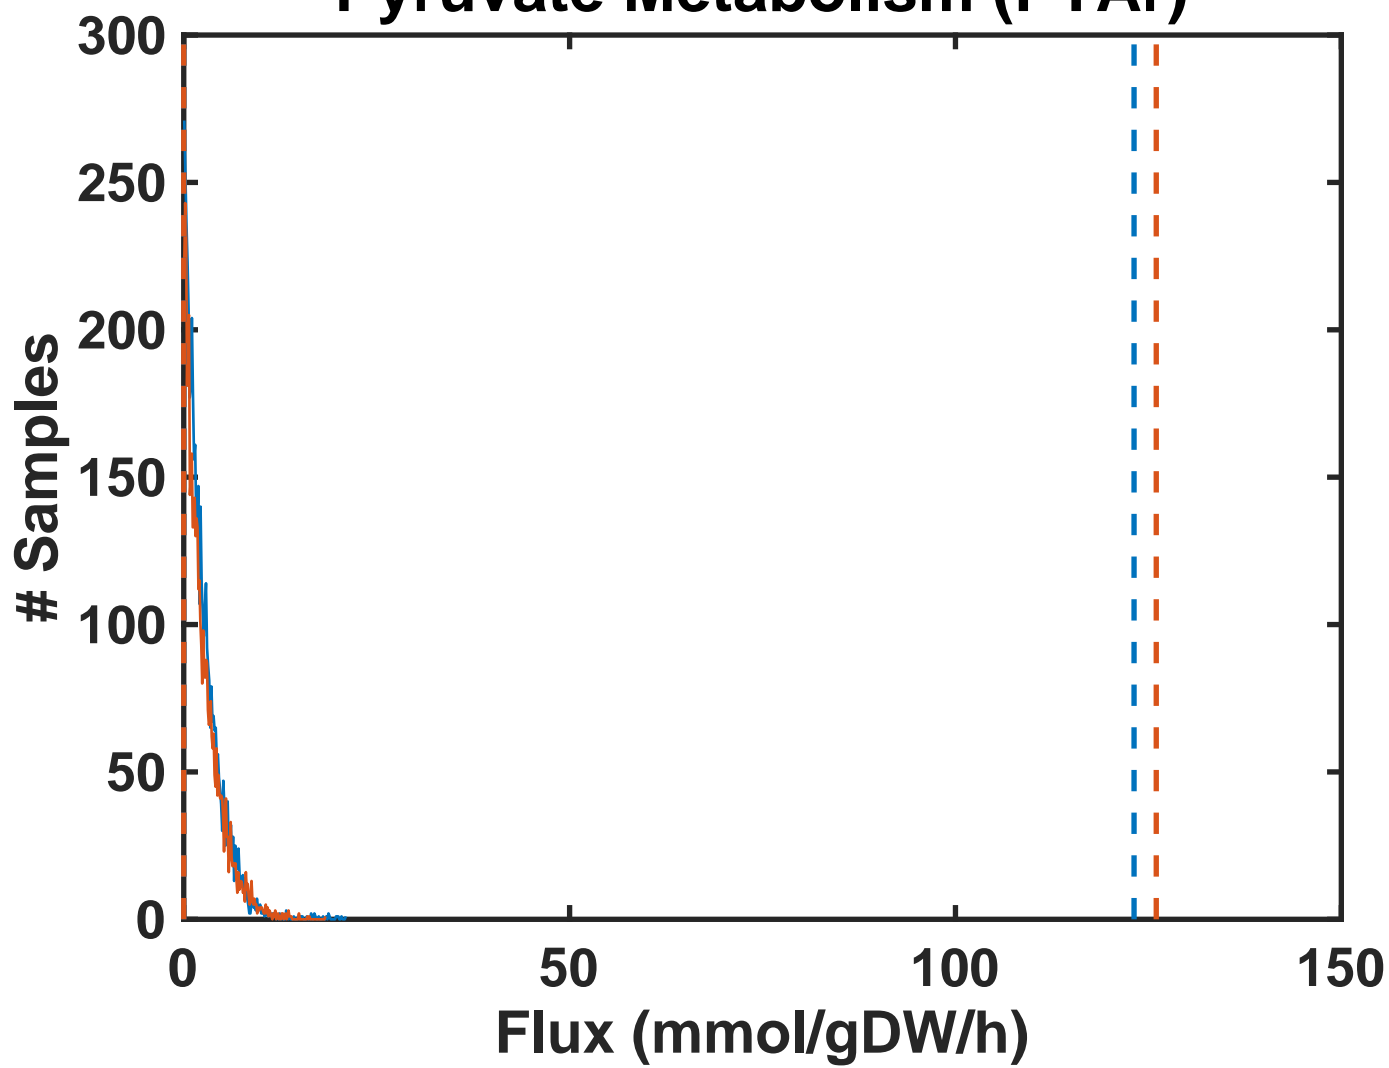

Supplement: s1 [file s1]

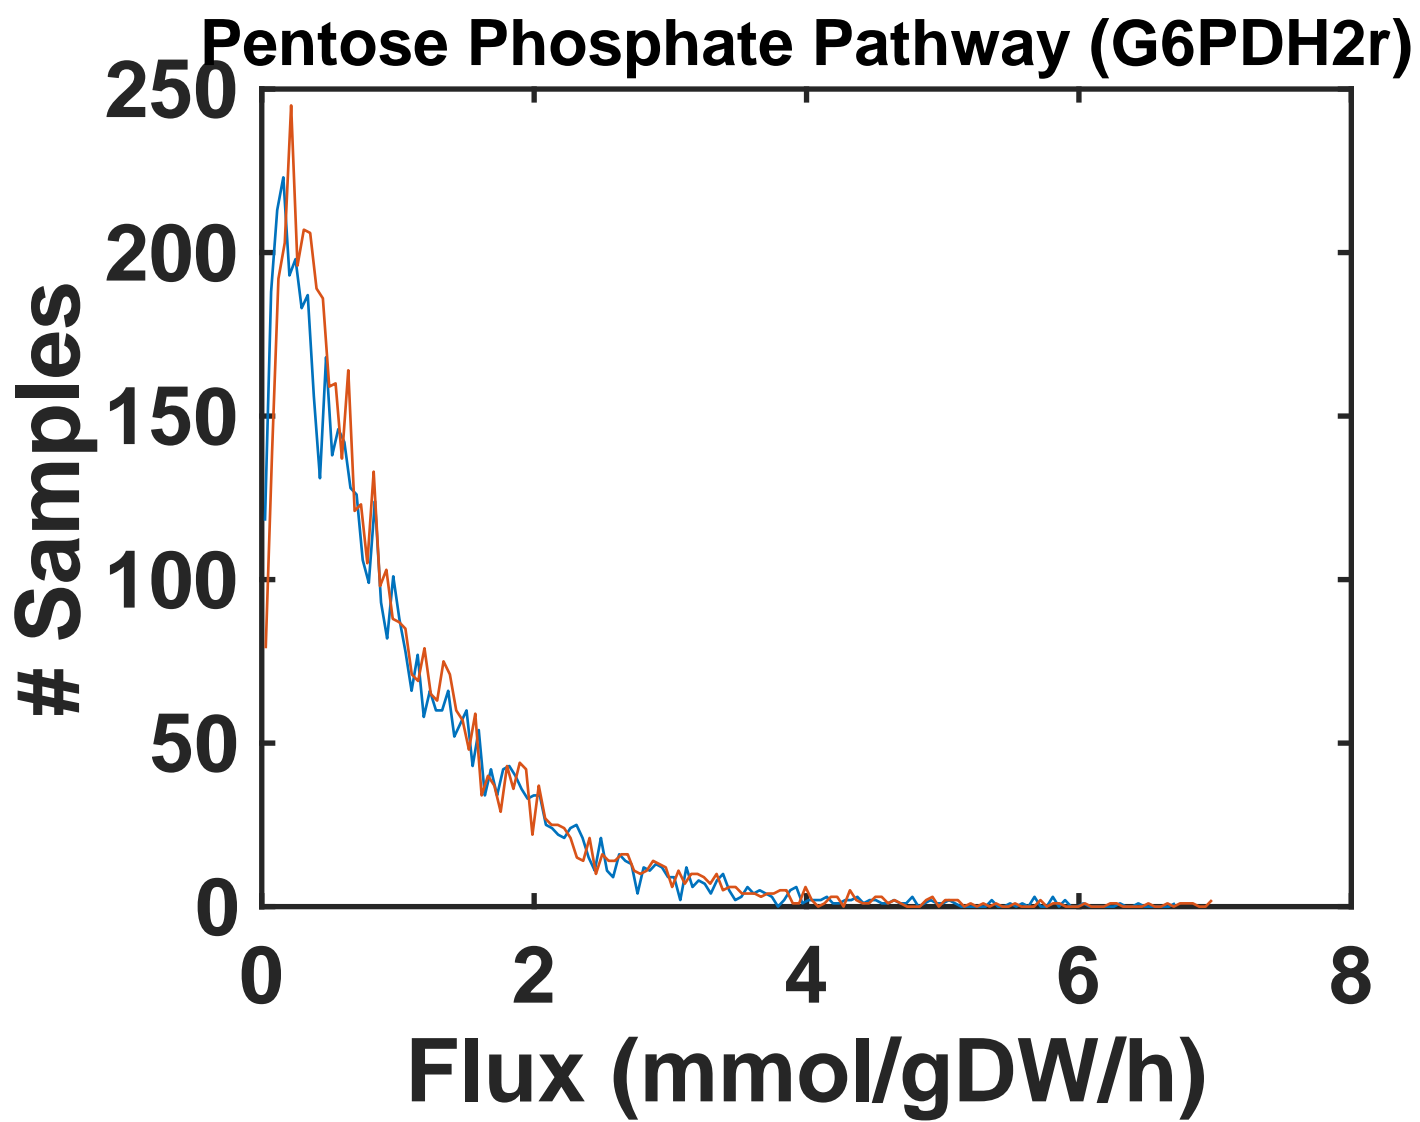

Supplement: s1 [file s1]

## Alanine and Aspartate Metabolism (ASPTA)

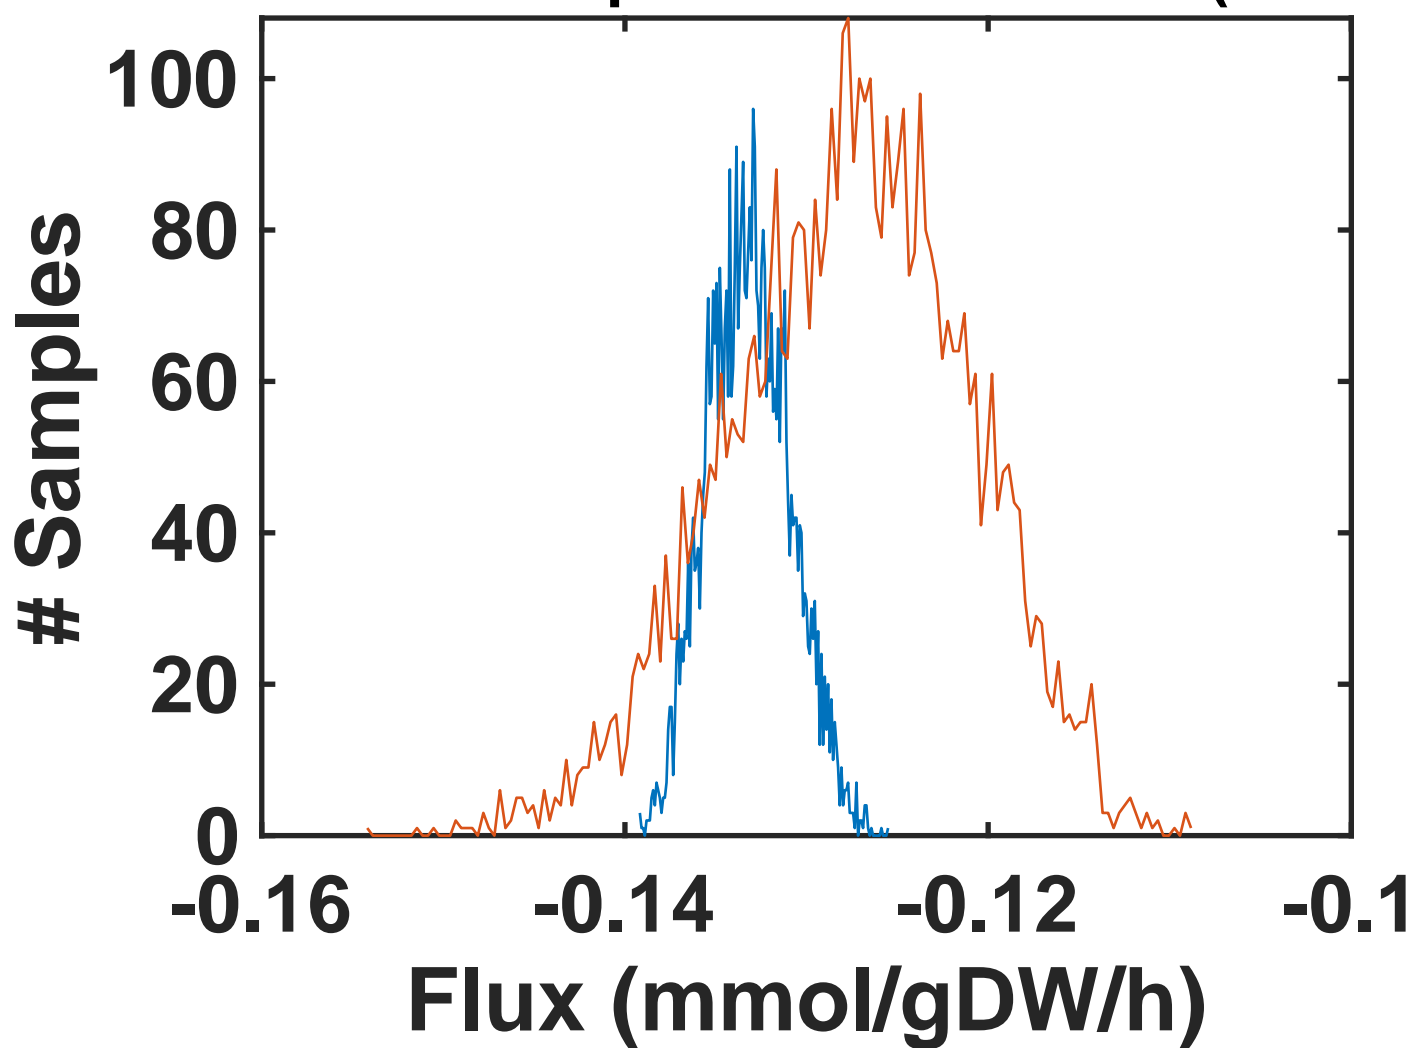

Supplement: s1 [file s1]

## Anaplerotic Reactions (PPCK)

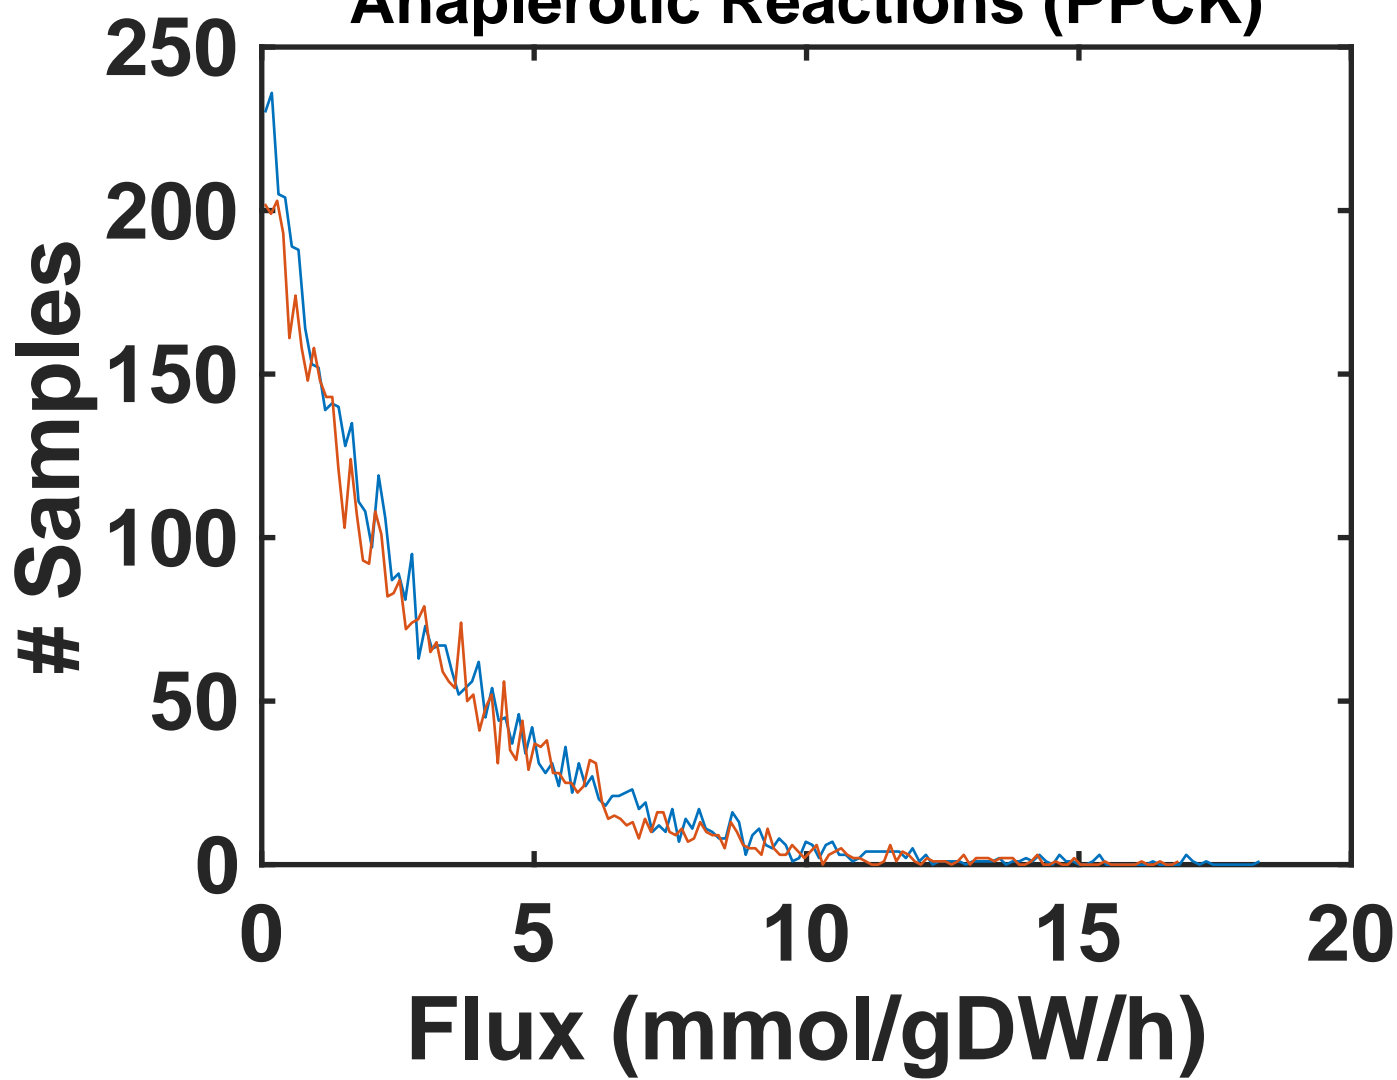

Supplement: s1 [file s1]

# Citric Acid Cycle (MDH3)

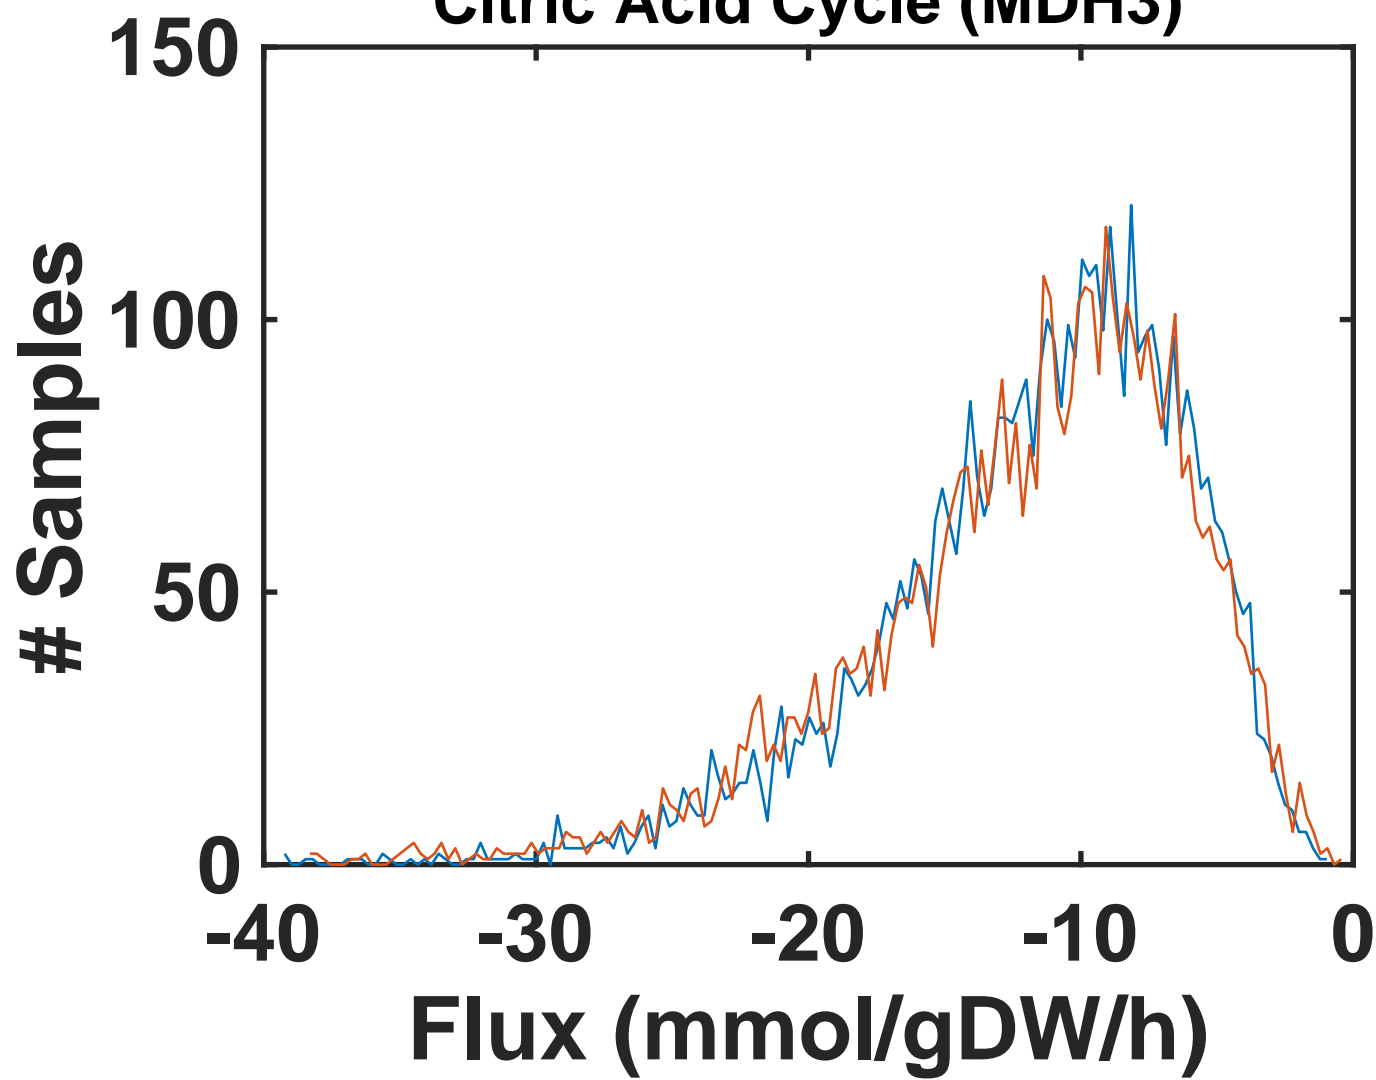

Supplement: s1 [file s1]

## Anaplerotic Reactions (ICL)

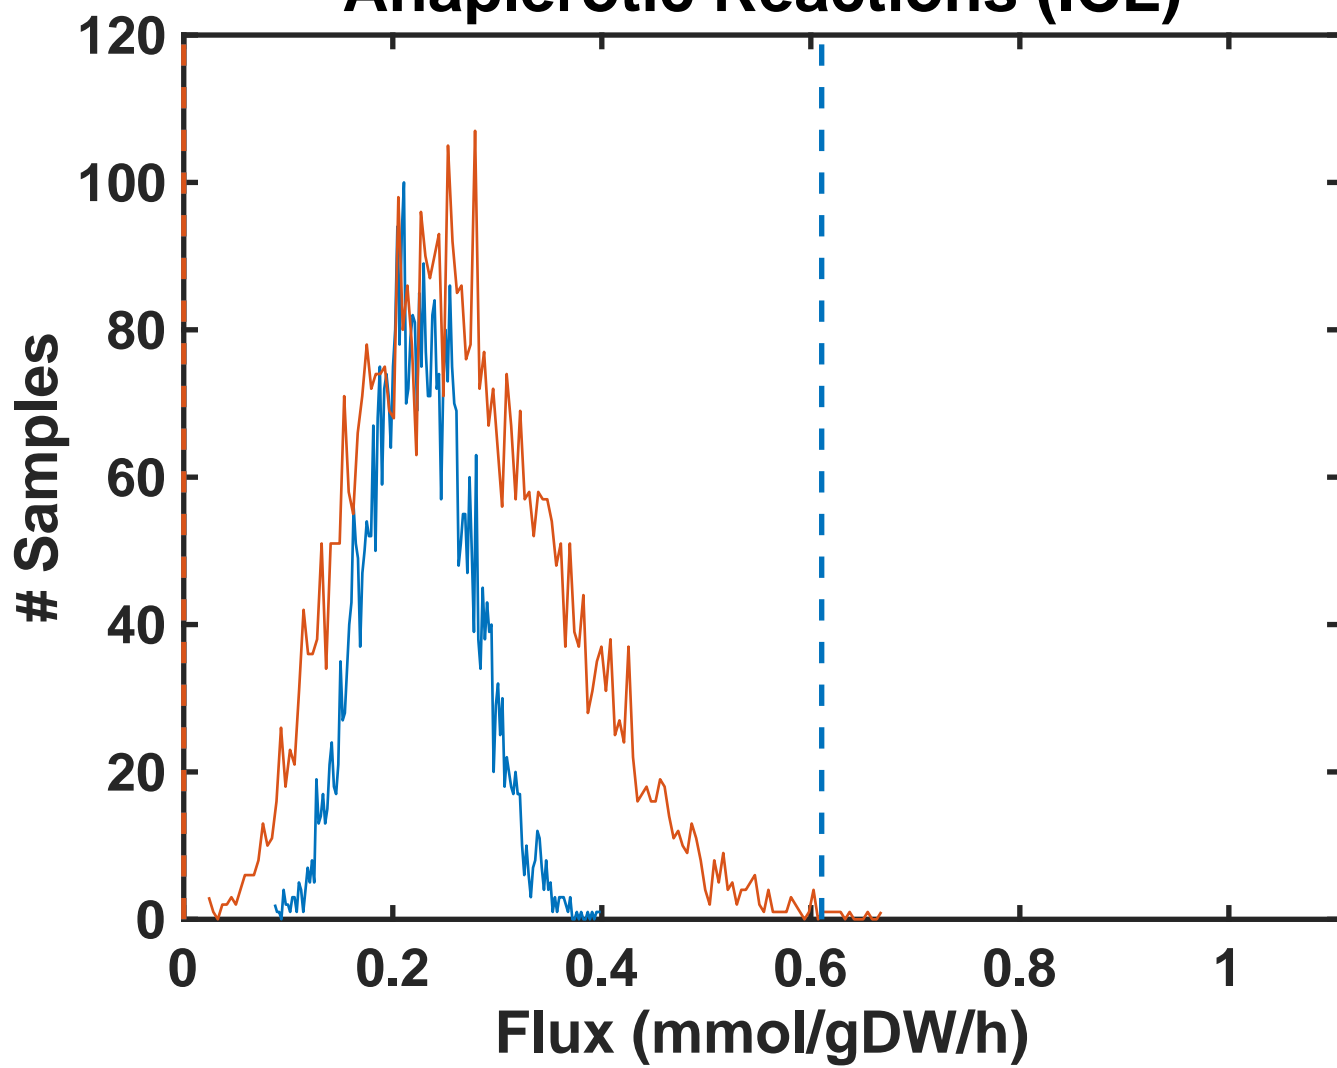

Supplement: s1 [file s1]

## Glycolysis/Gluconeogenesis (TPI)

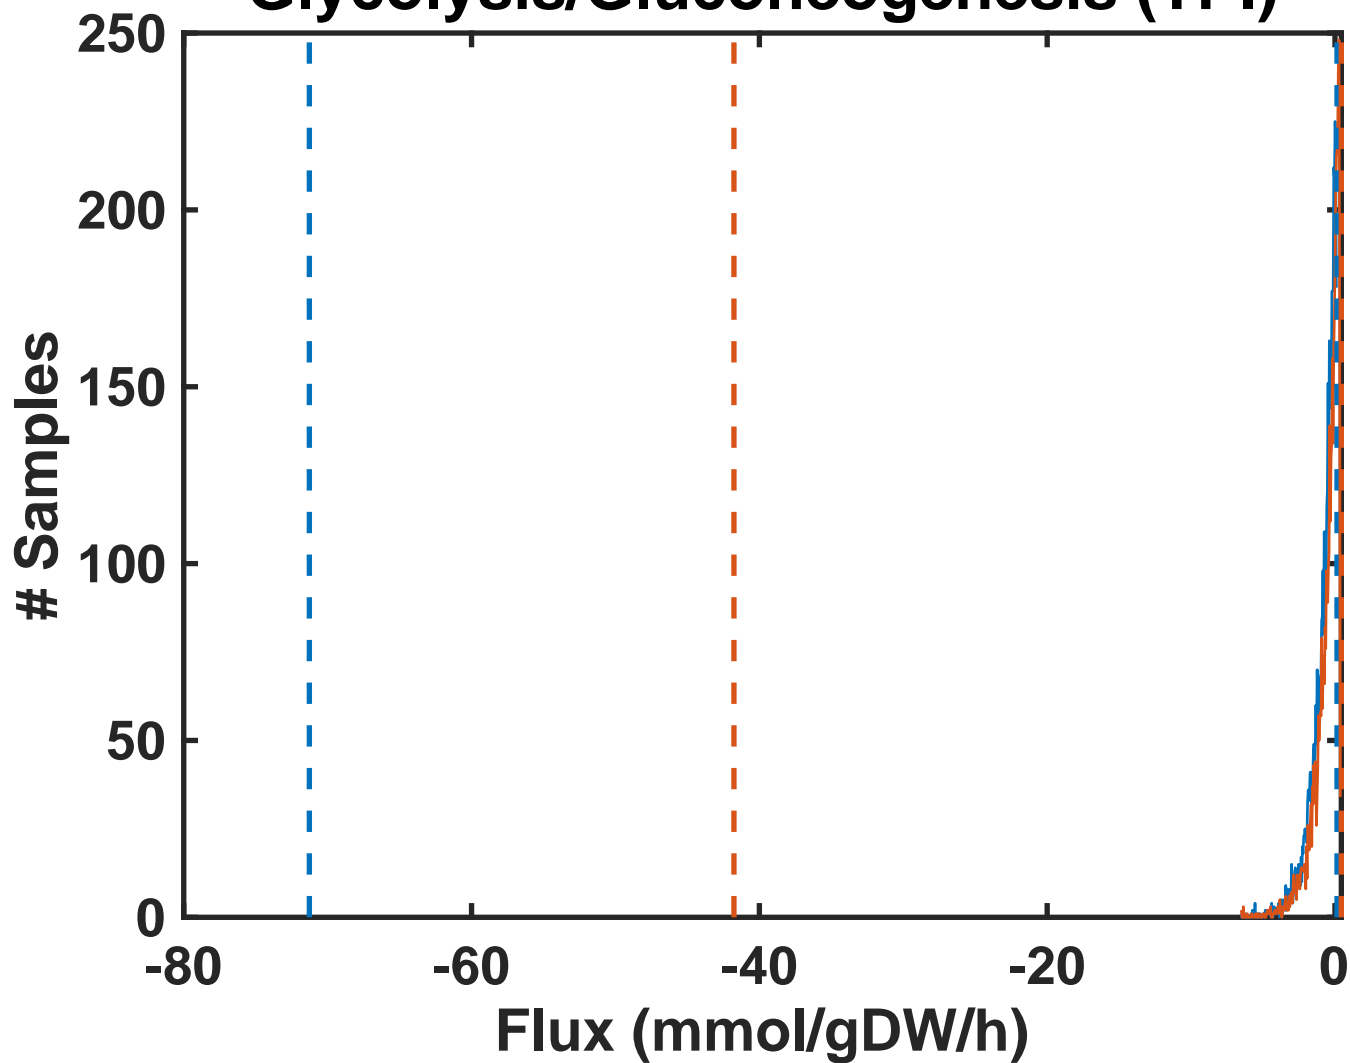

Supplement: s1 [file s1]

■ Batch, 36 h  
■ Fed-batch, 48 h

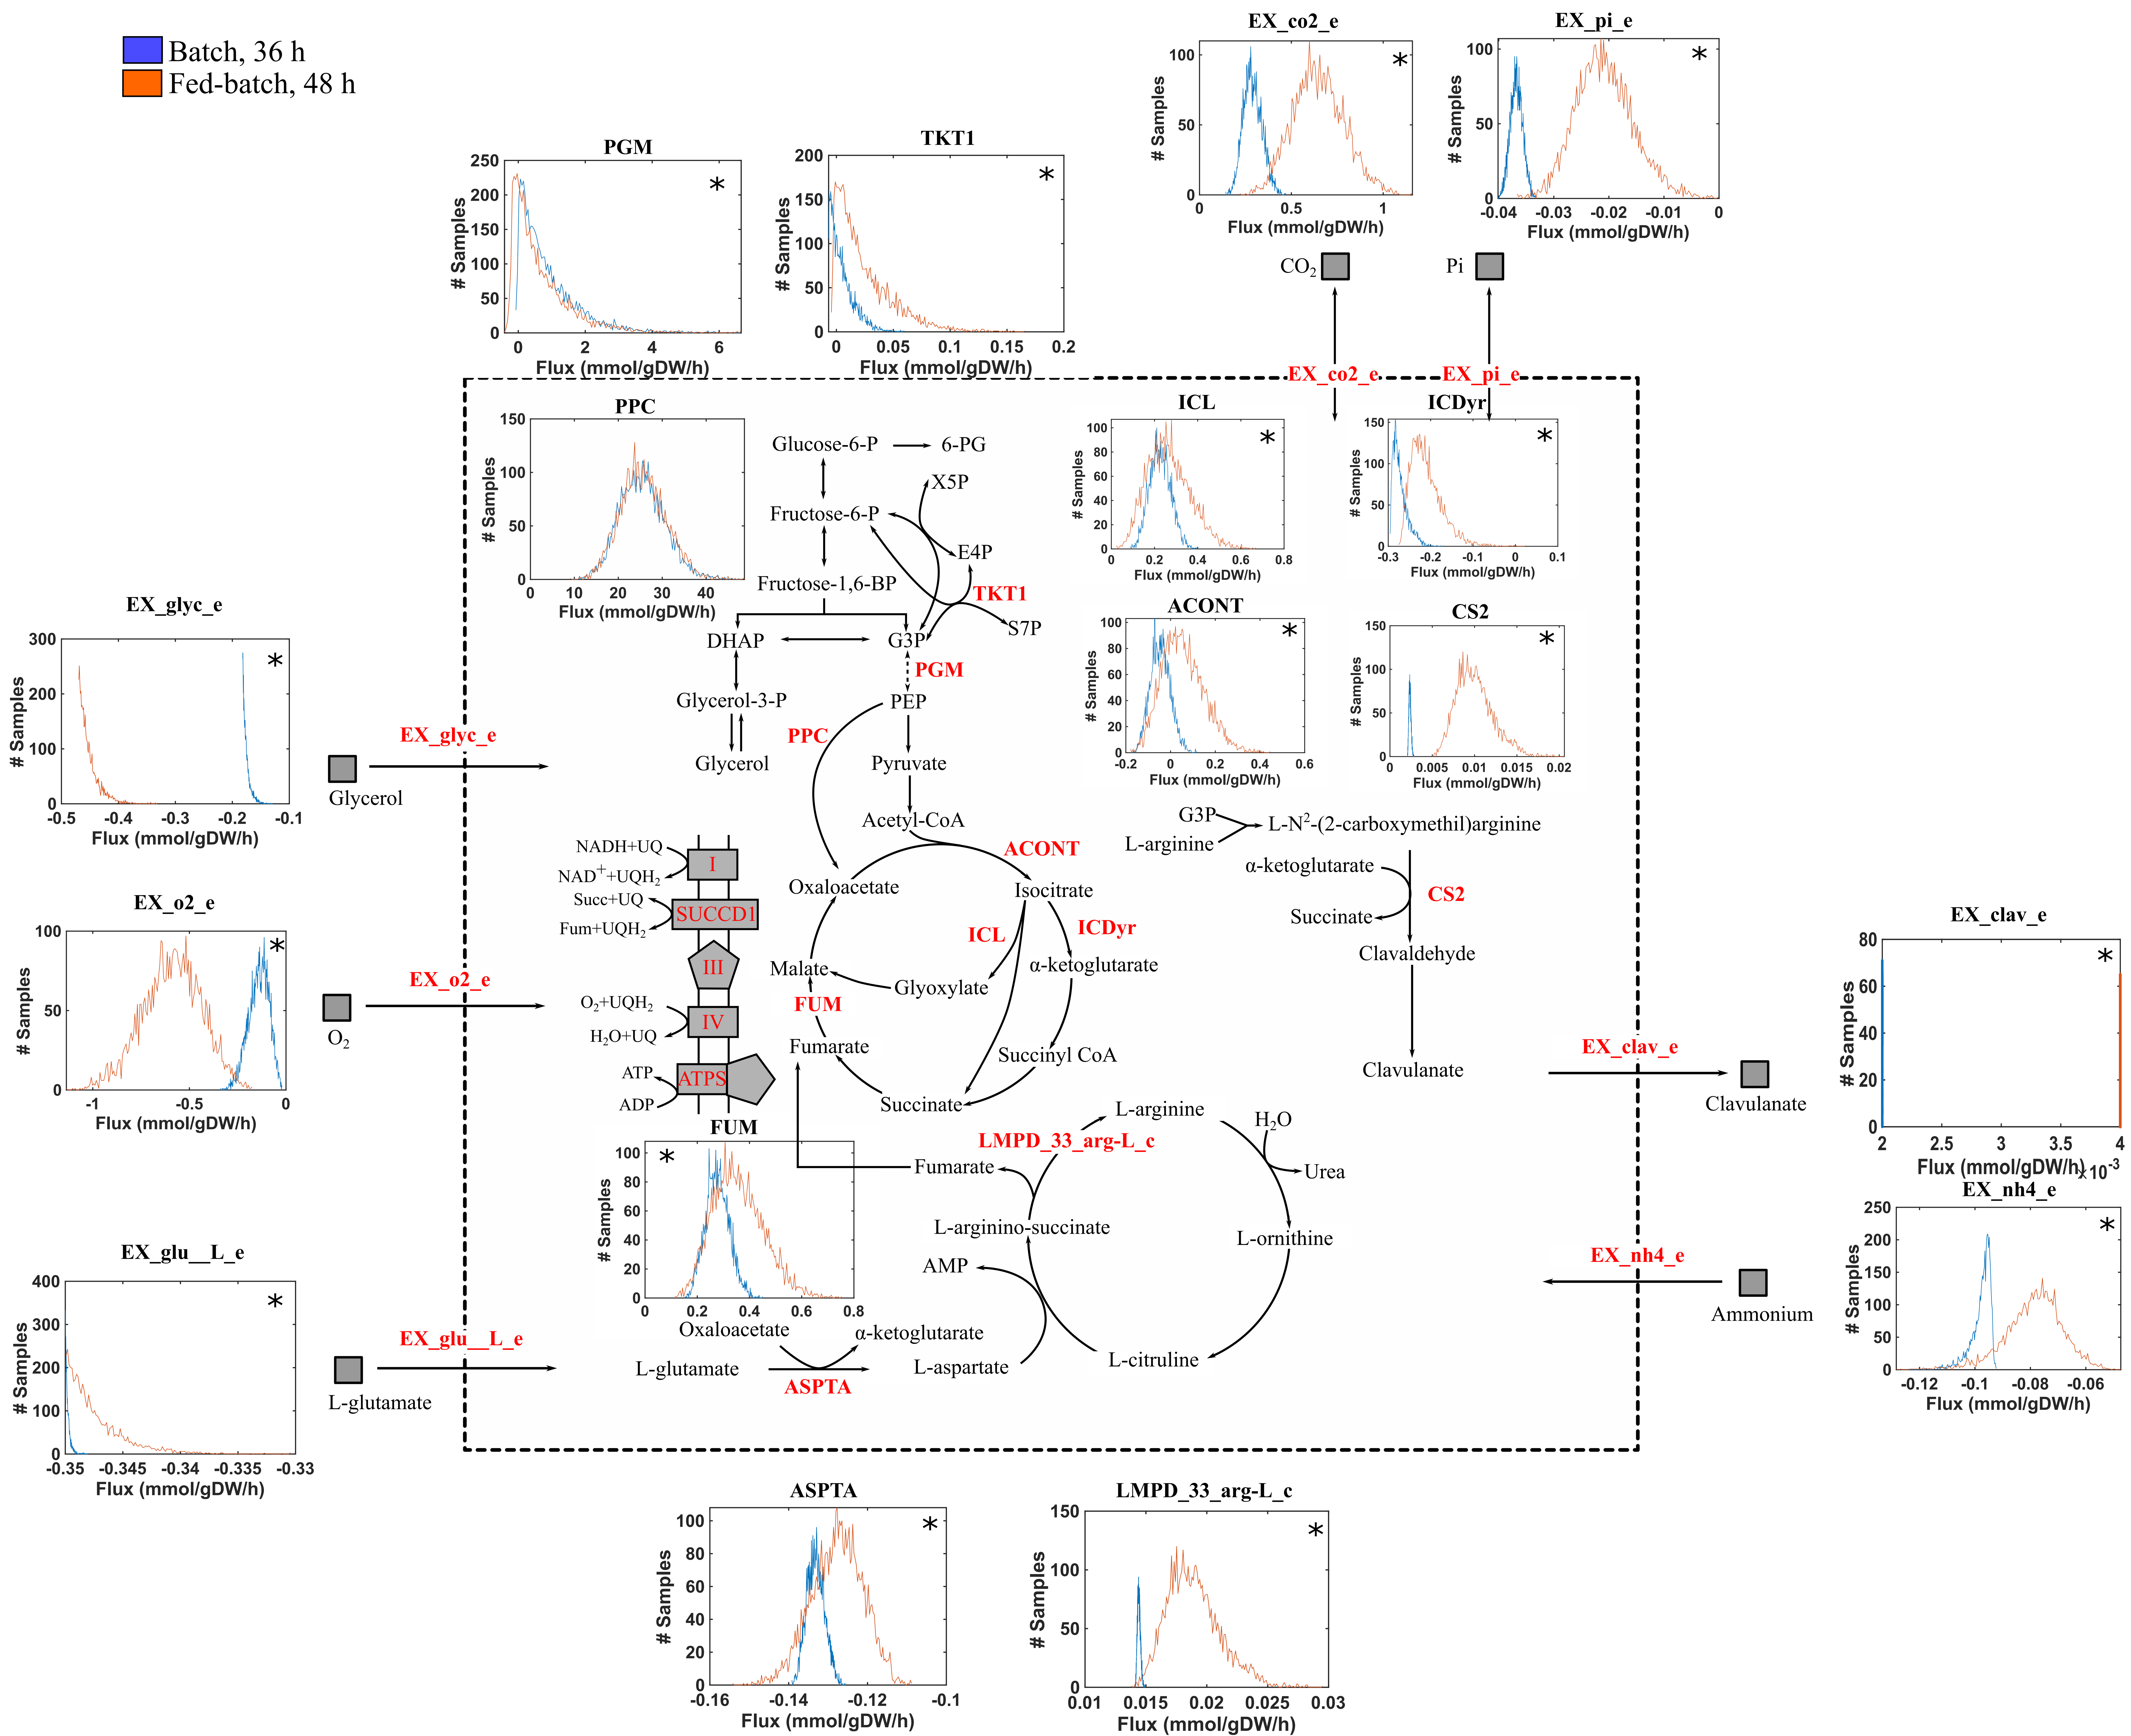

Supplement: s1 [file s1]

# Citric Acid Cycle (SUCD1)

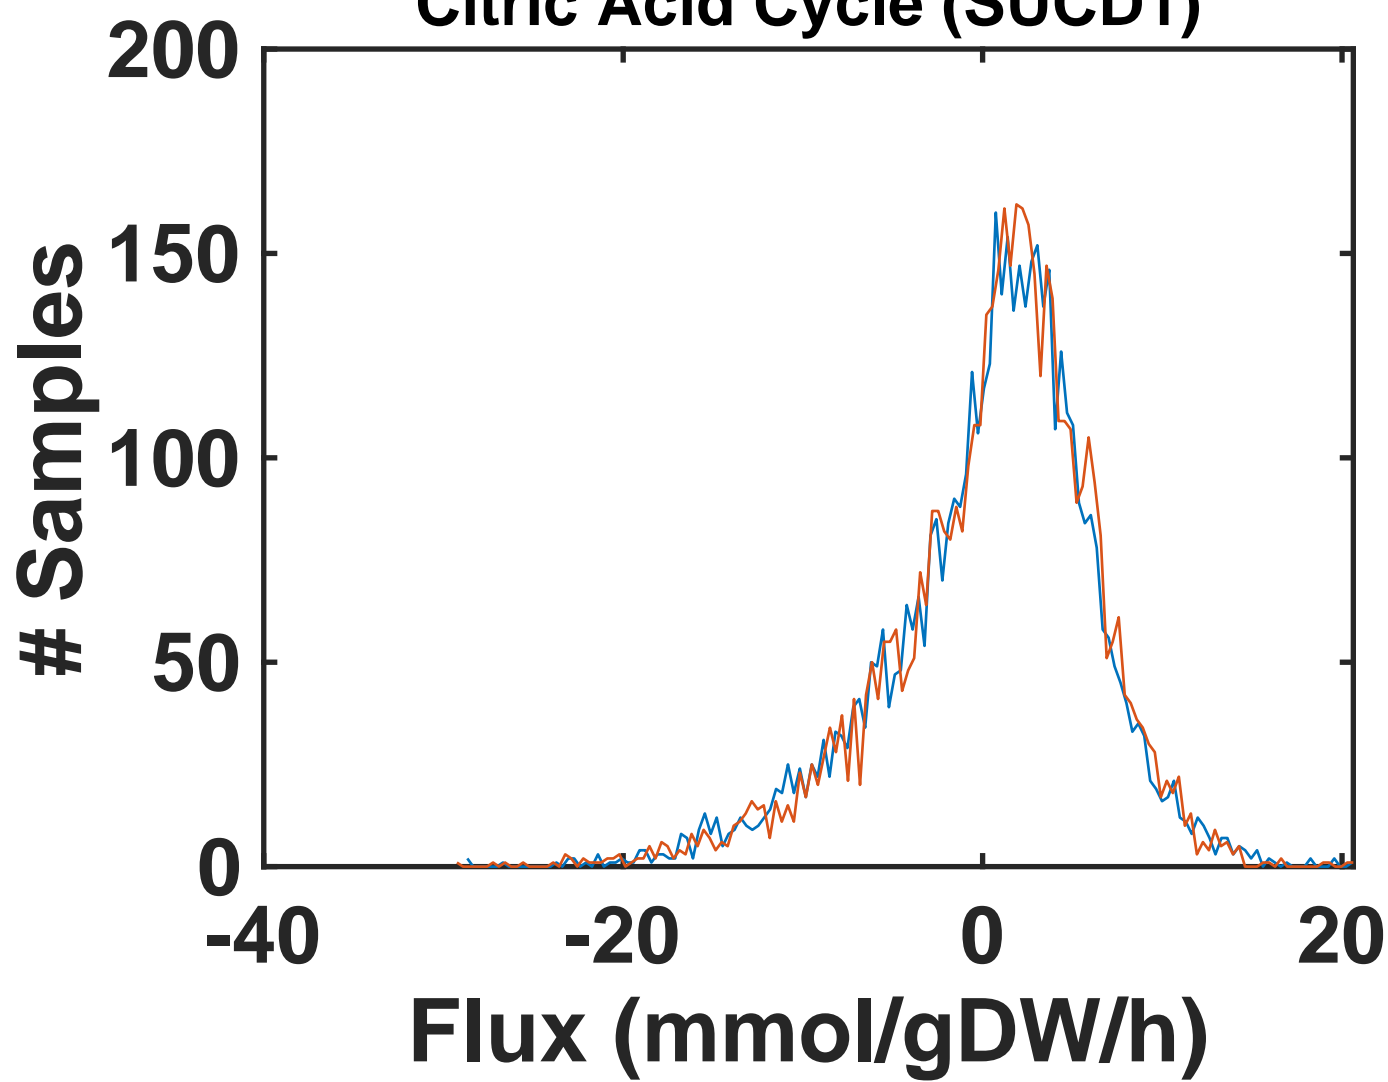

Supplement: s1 [file s1]

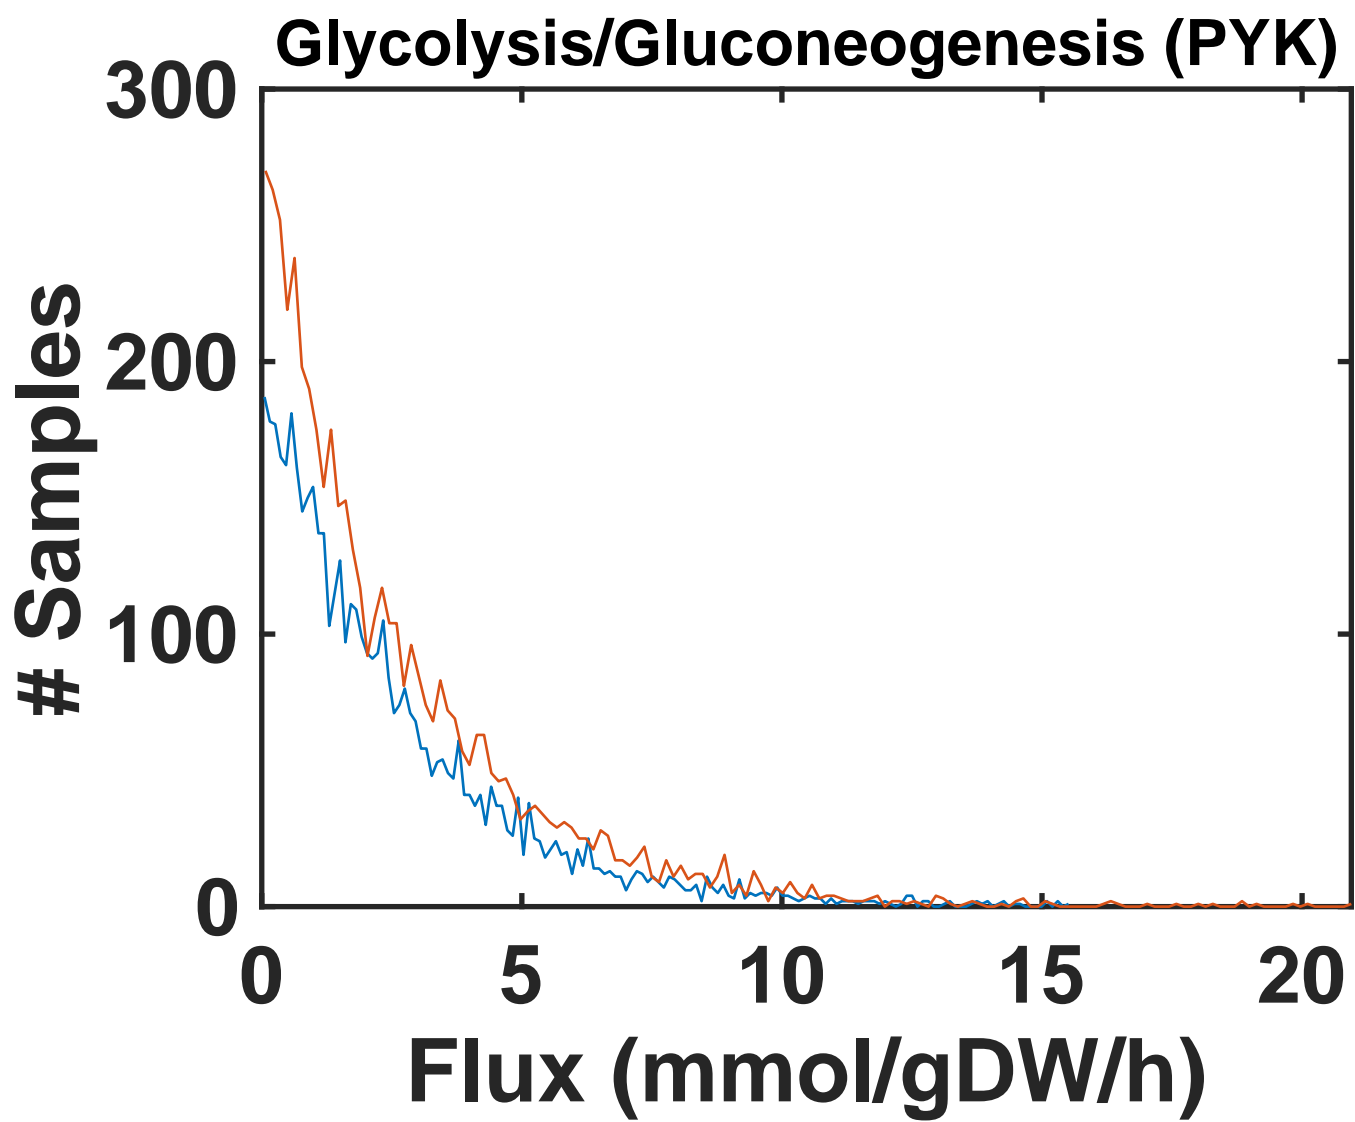

Supplement: s1 [file s1]

## Pentose Phosphate Pathway (TALA)

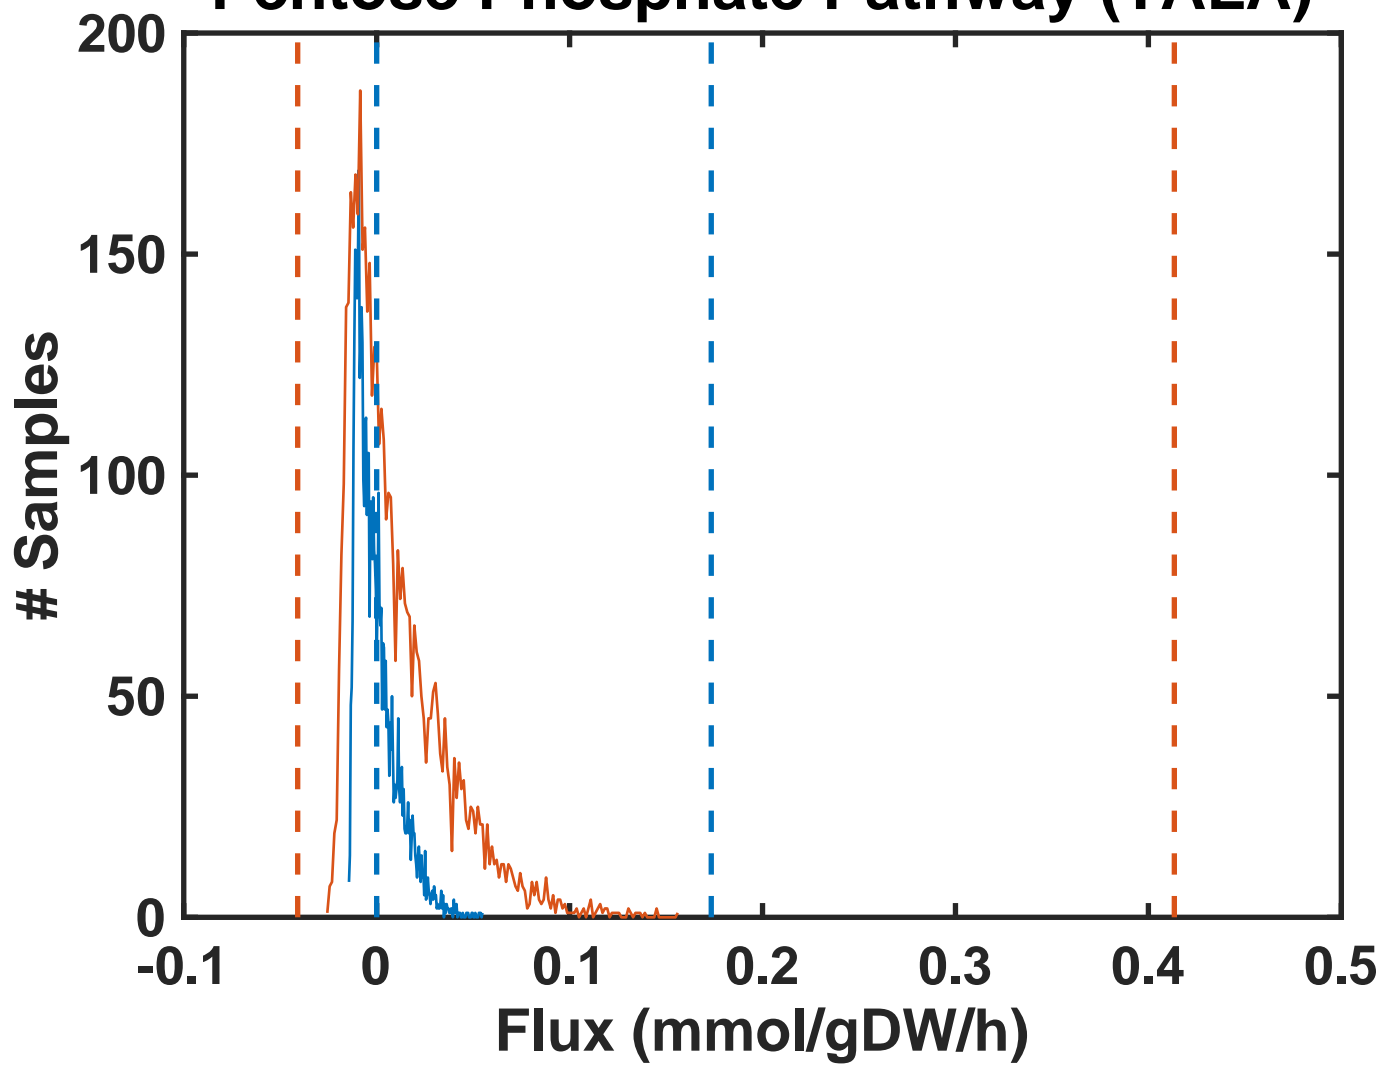

Supplement: s1 [file s1]

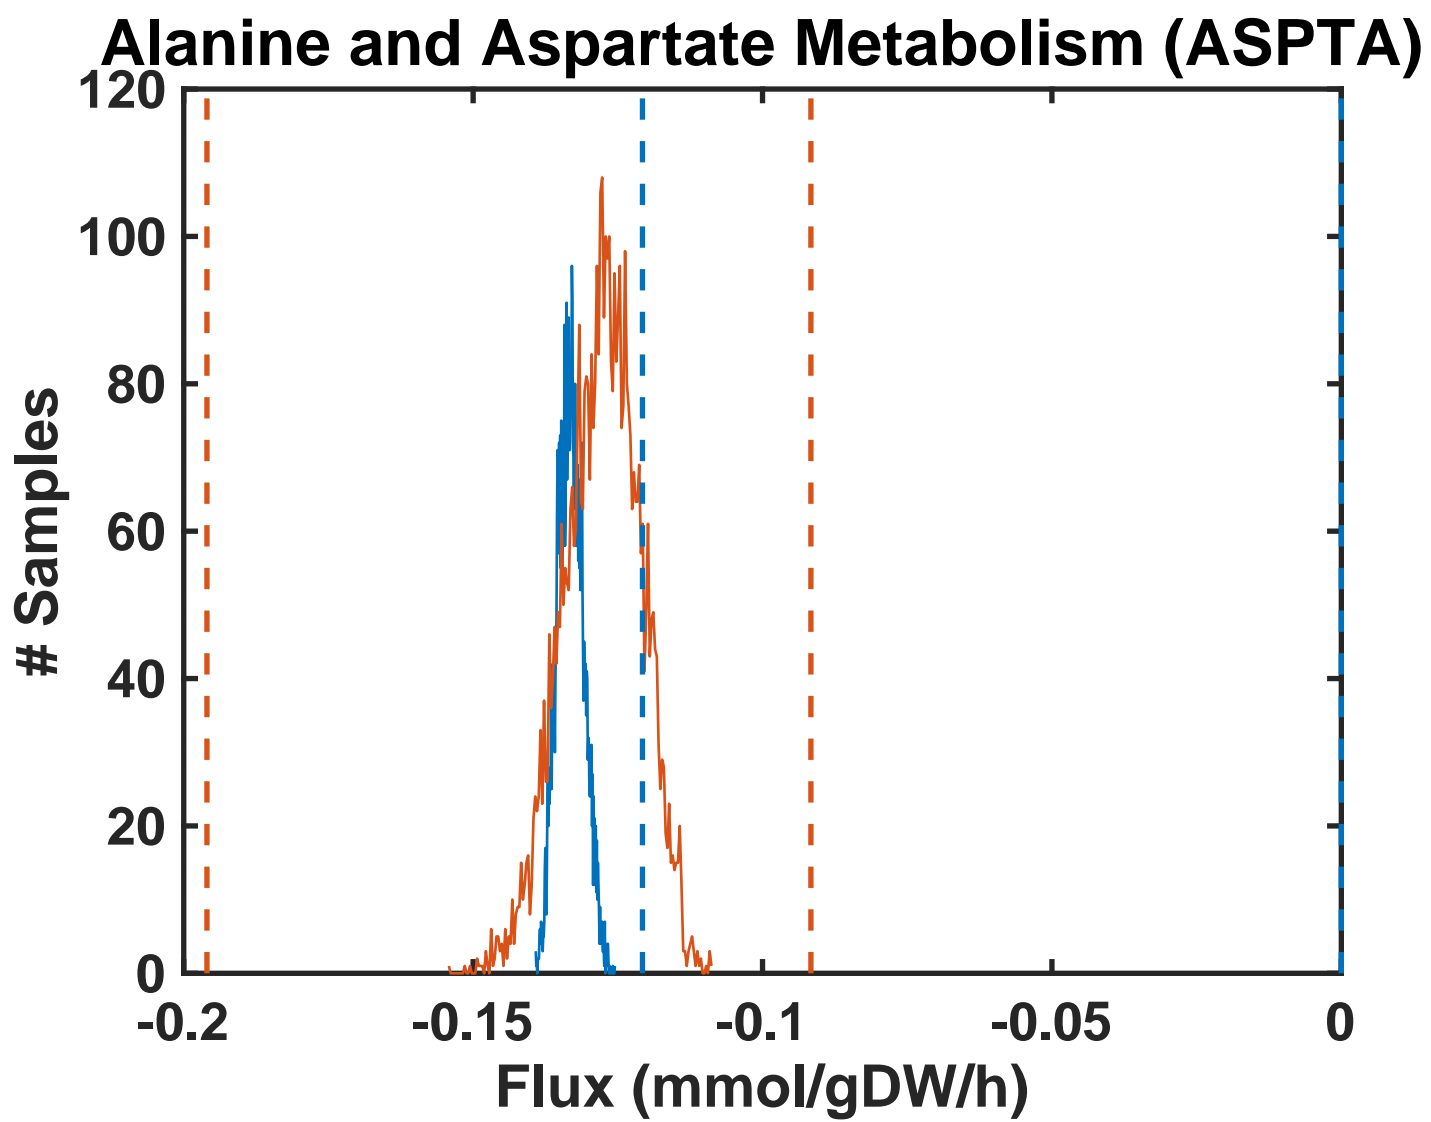

Supplement: s1 [file s1]

# Citric Acid Cycle (ACONT)

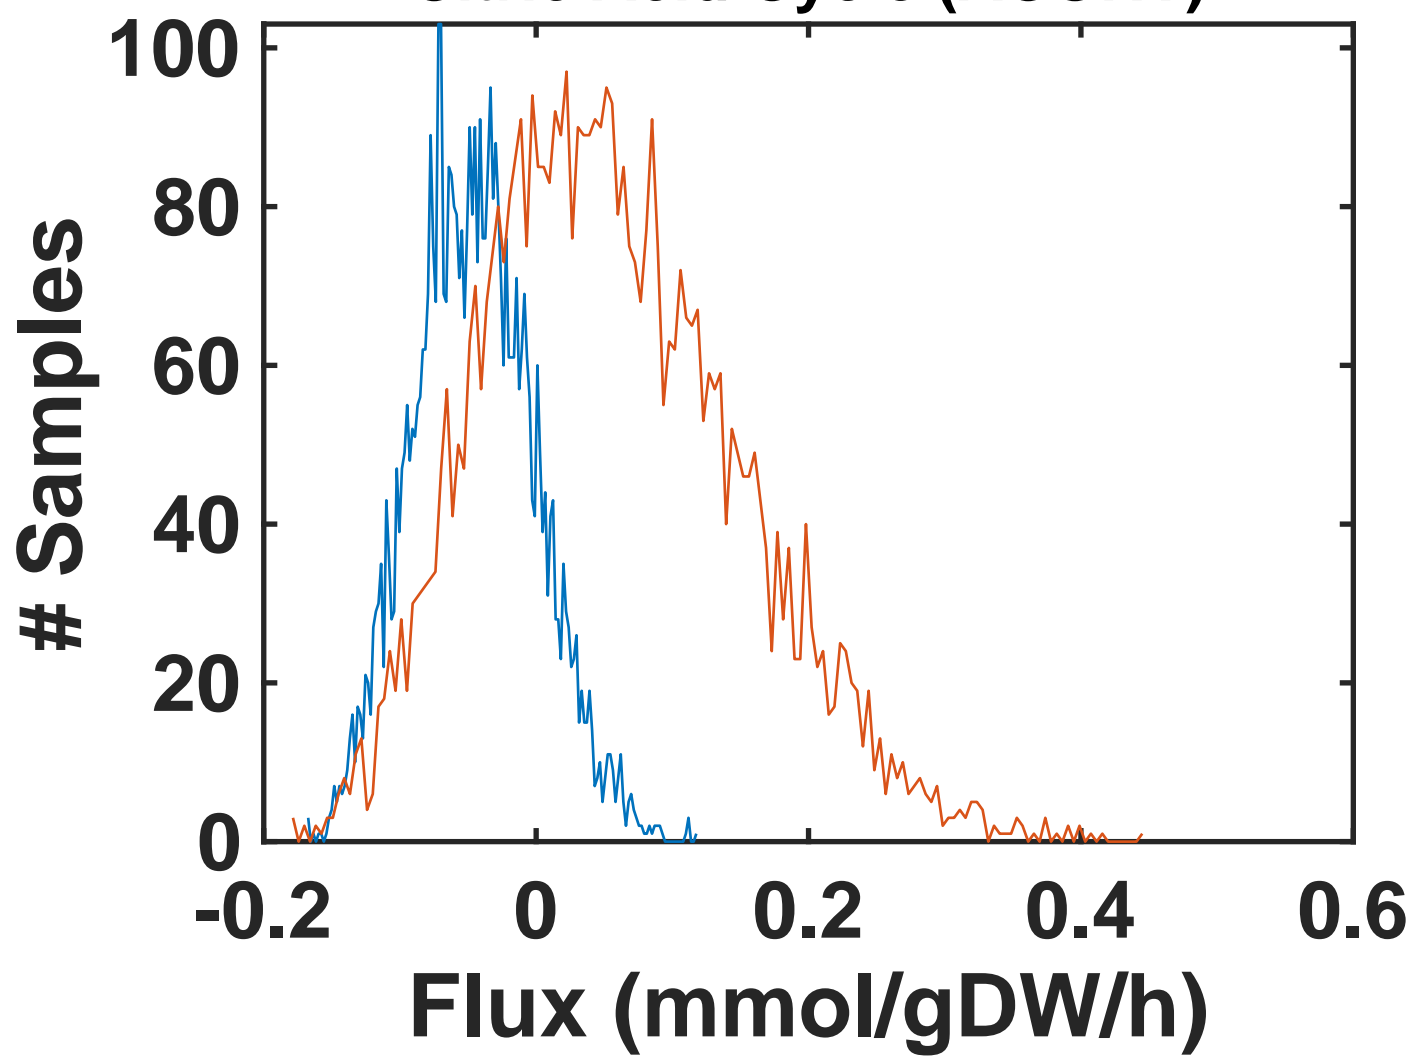

Supplement: s1 [file s1]

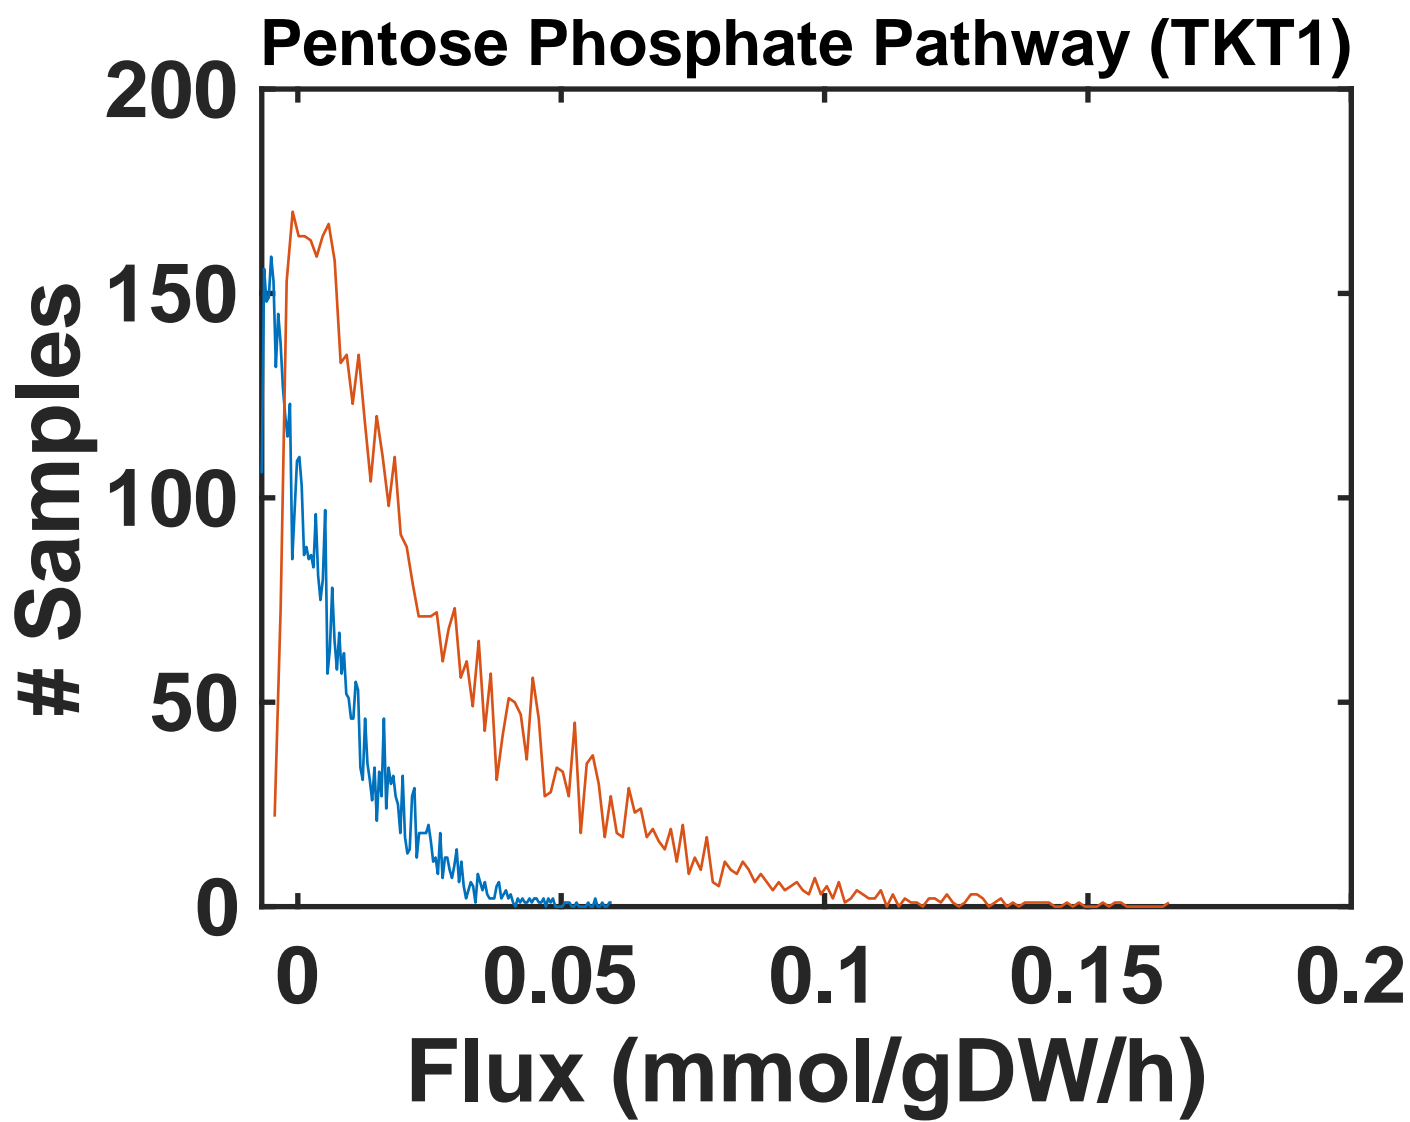

Supplement: s1 [file s1]

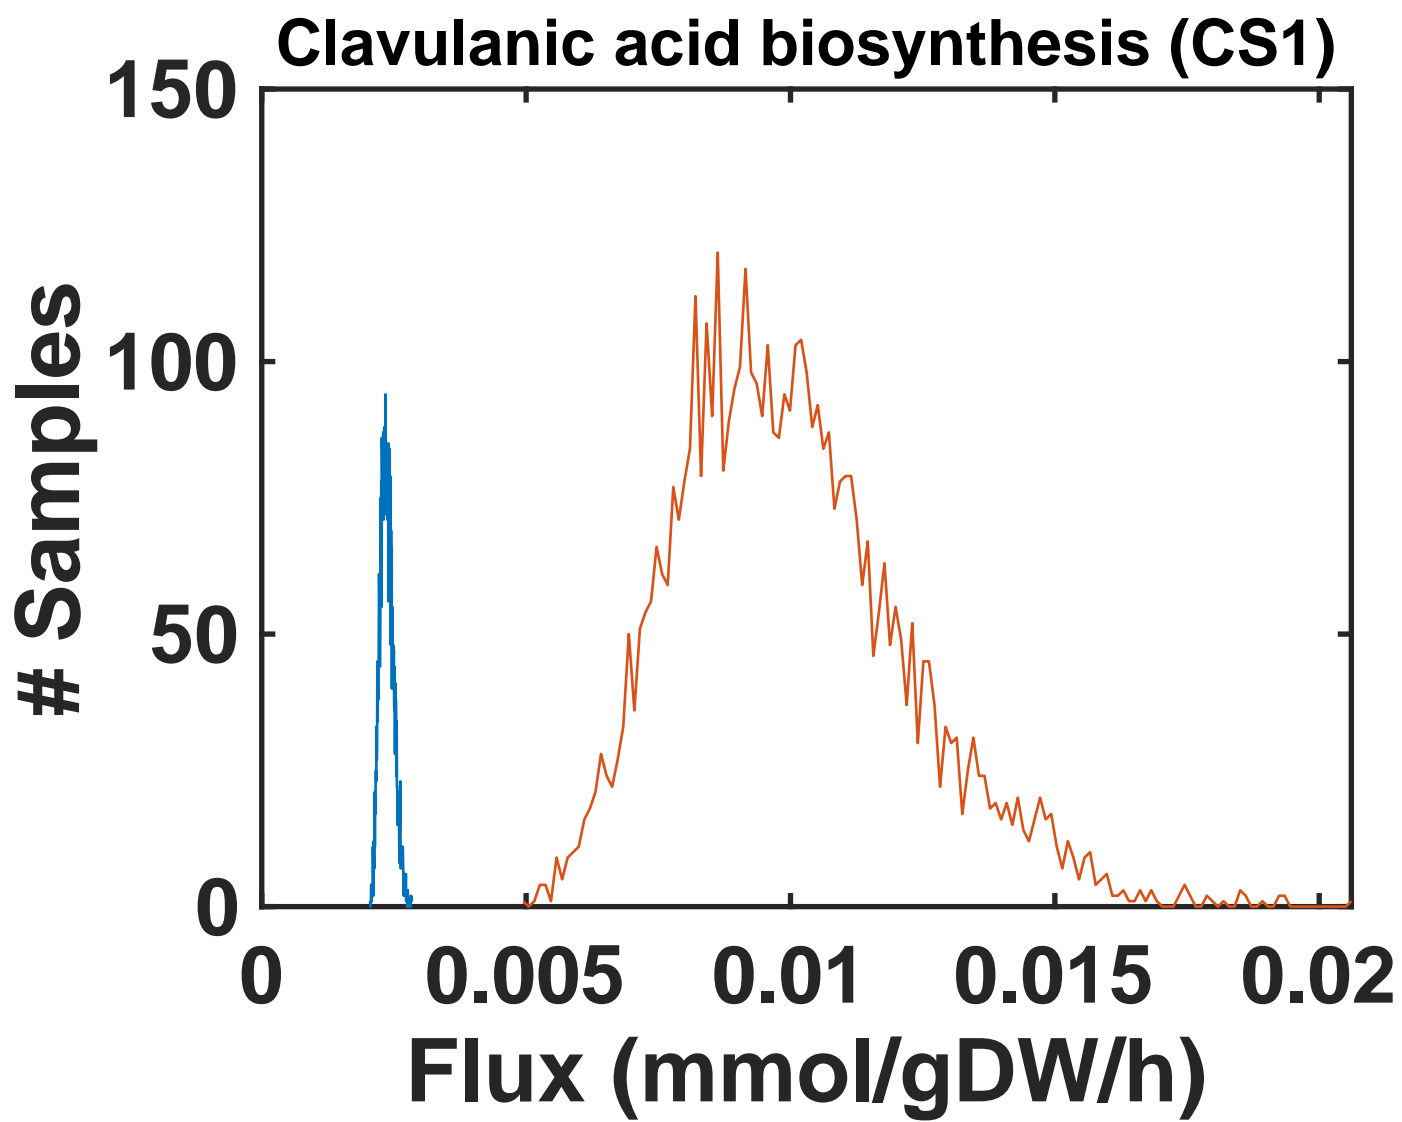

Supplement: s1 [file s1]

## Citric Acid Cycle (CS)

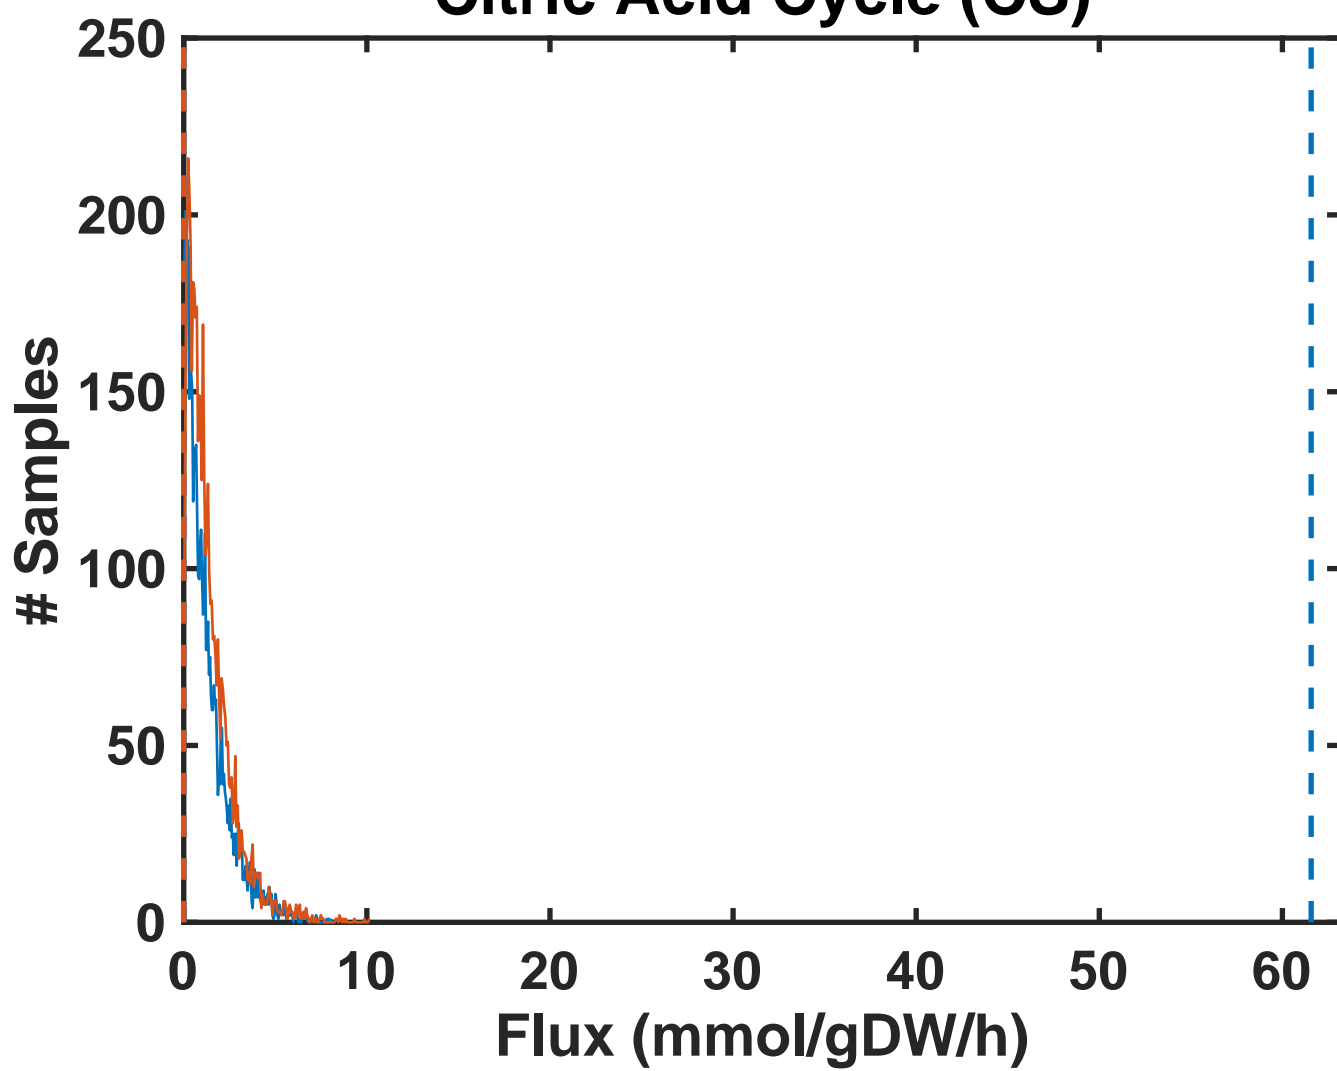

Supplement: s1 [file s1]

## Citric Acid Cycle (SUCD1)

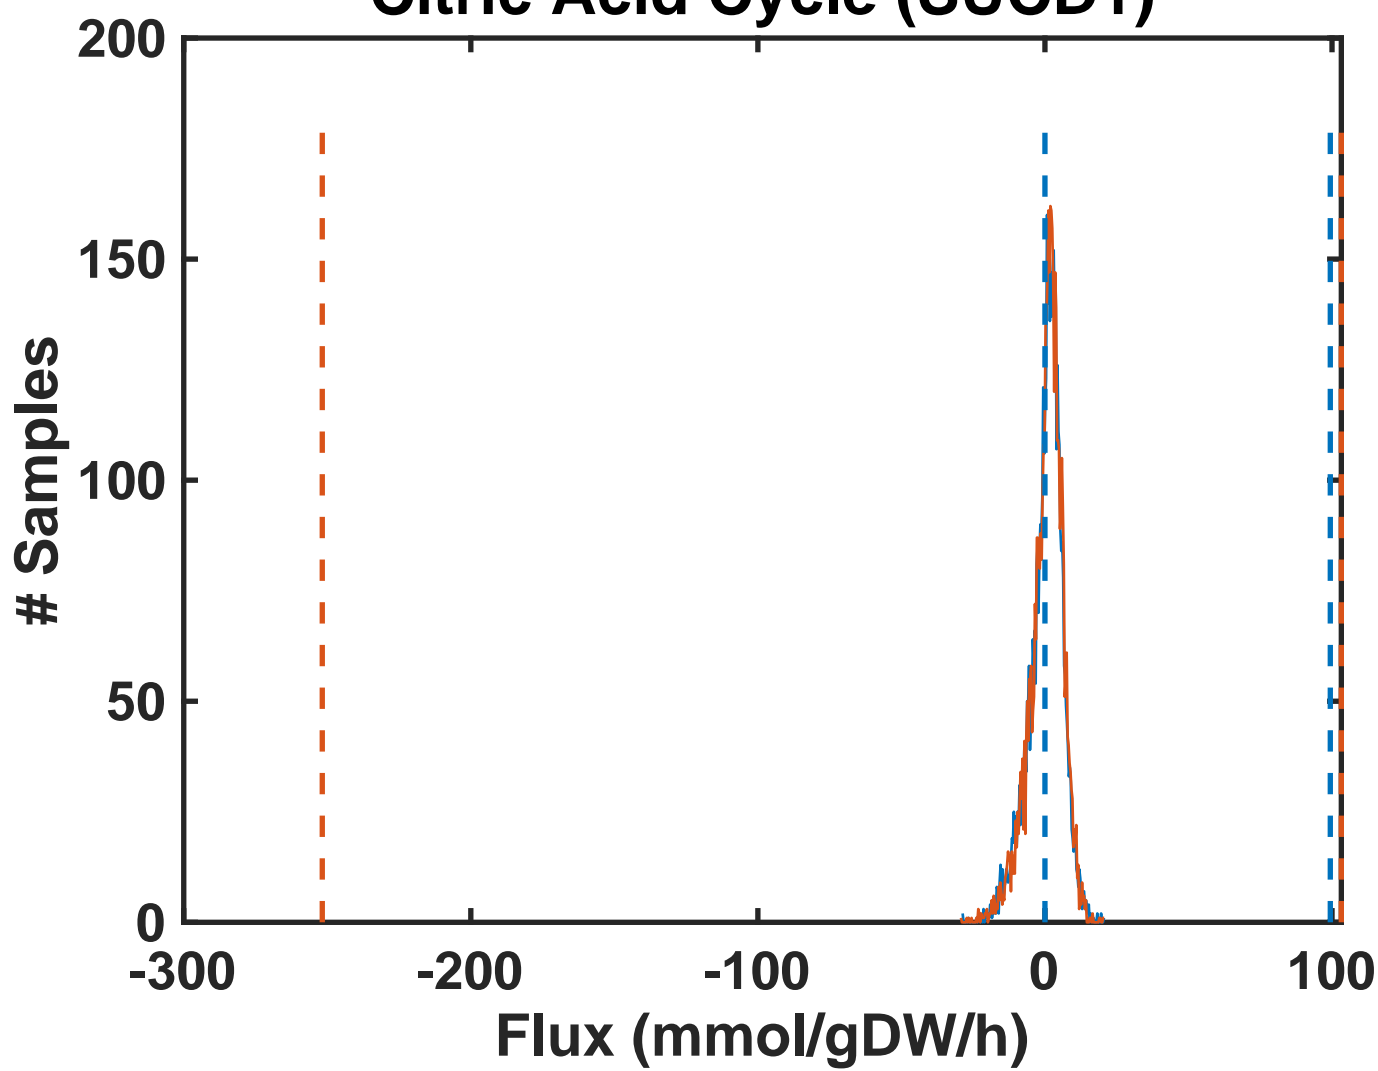

Supplement: s1 [file s1]

## Oxidative Phosphorylation (L<sub>L</sub> ACD2)

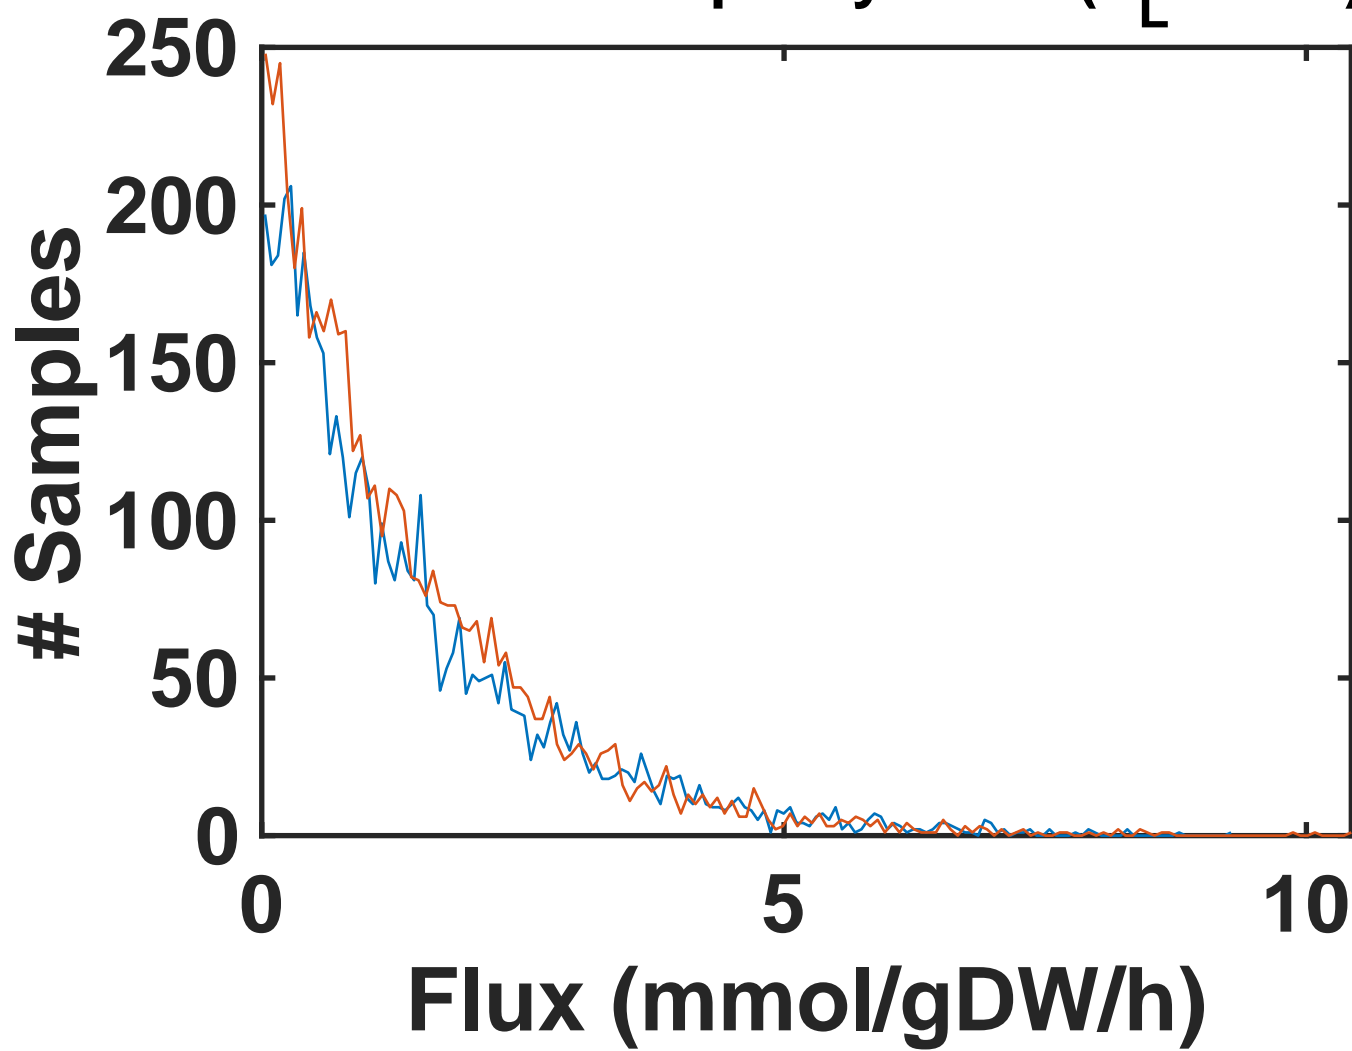

Supplement: s1 [file s1]

(AKGDH)

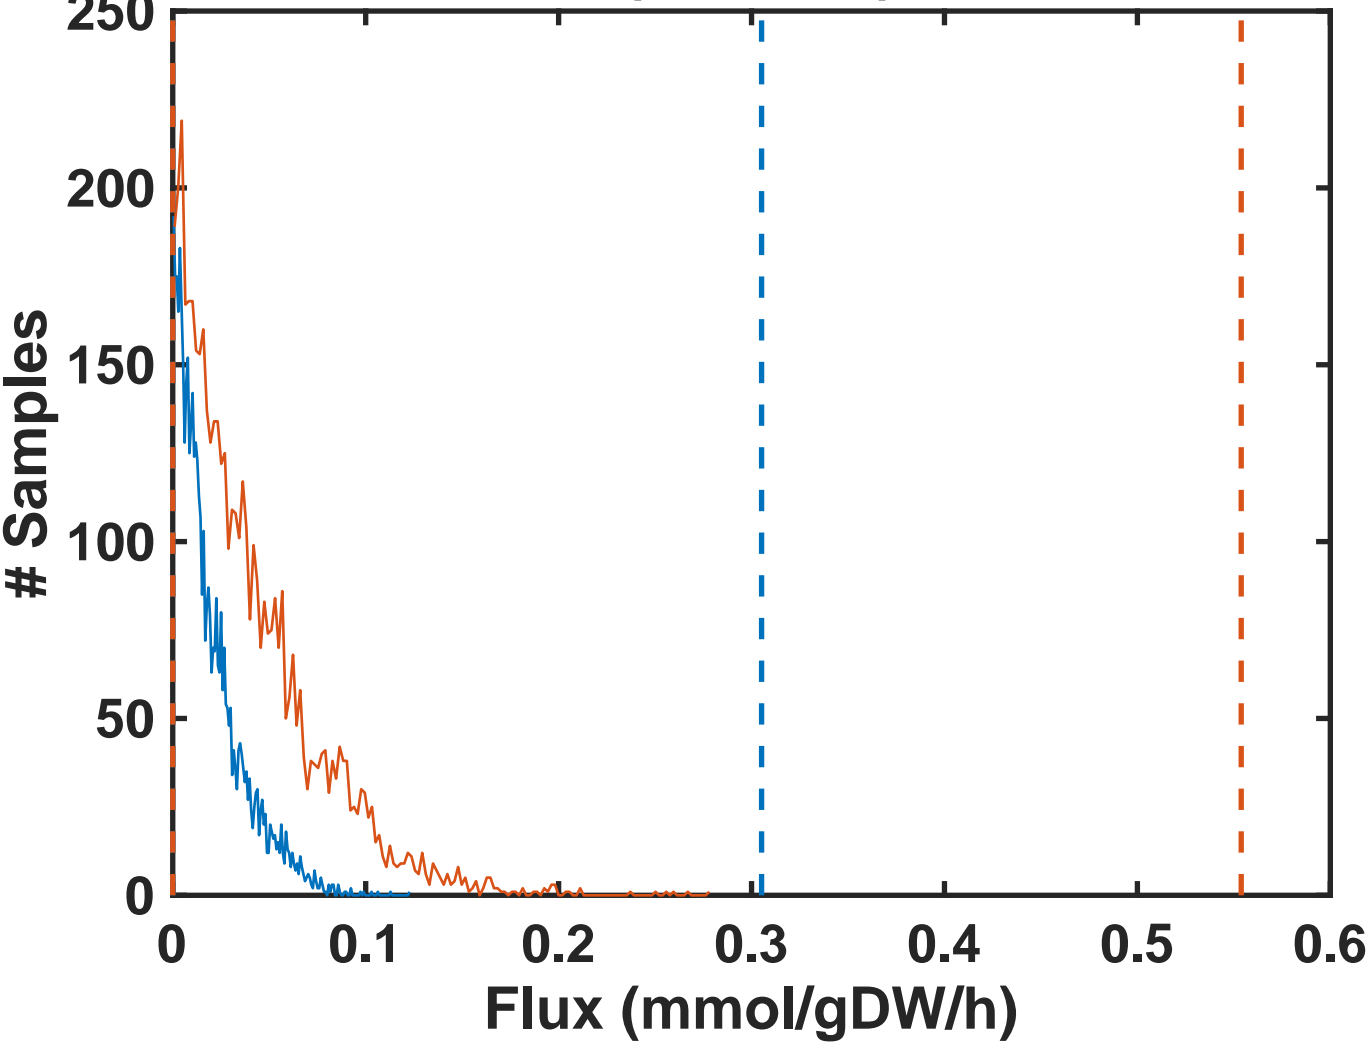

Supplement: s1 [file s1]

## Pyruvate Metabolism (ACKr)

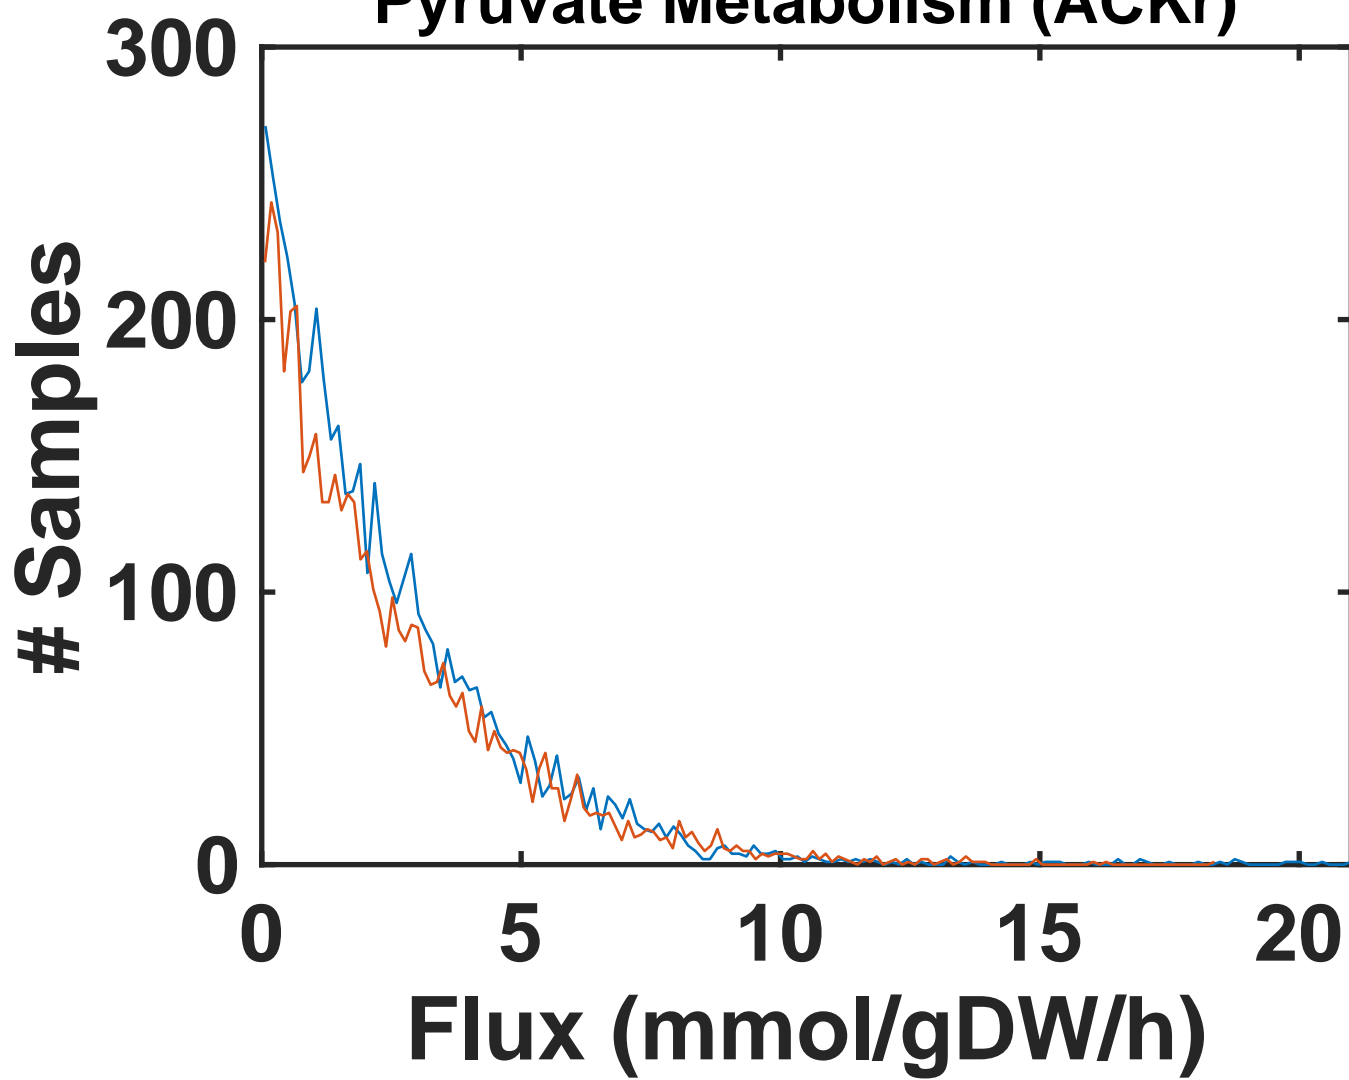

Supplement: s1 [file s1]

## Pyruvate Metabolism (PFL)

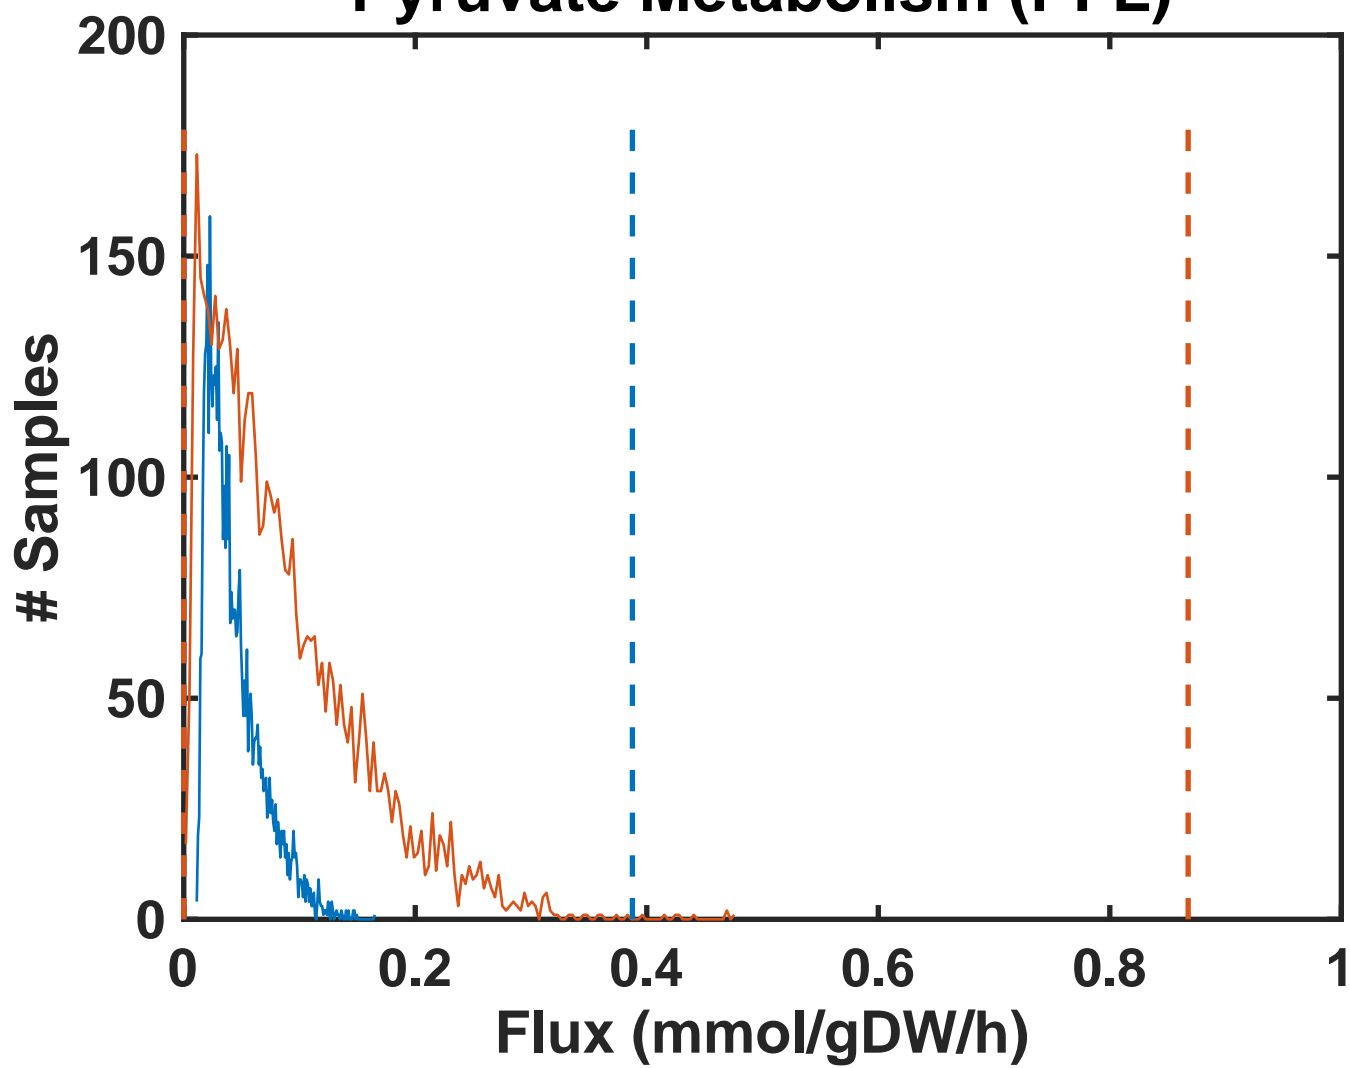

Supplement: s1 [file s1]

## Clavulanic acid biosynthesis (CS1)

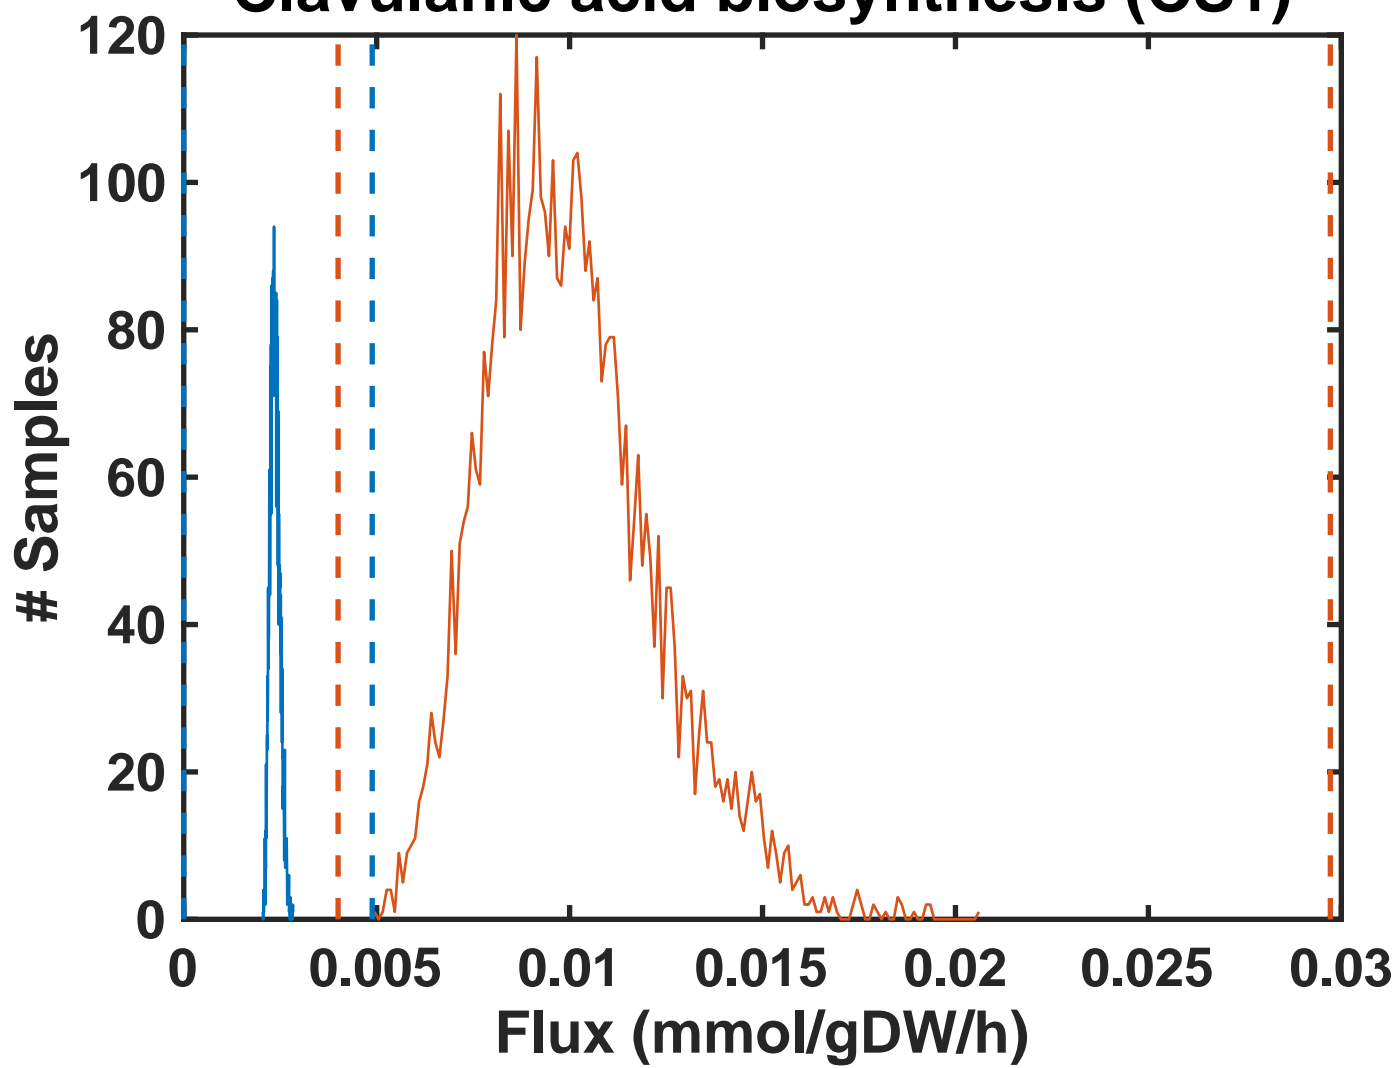

Supplement: s1 [file s1]

## Pyruvate Metabolism (ACALD)

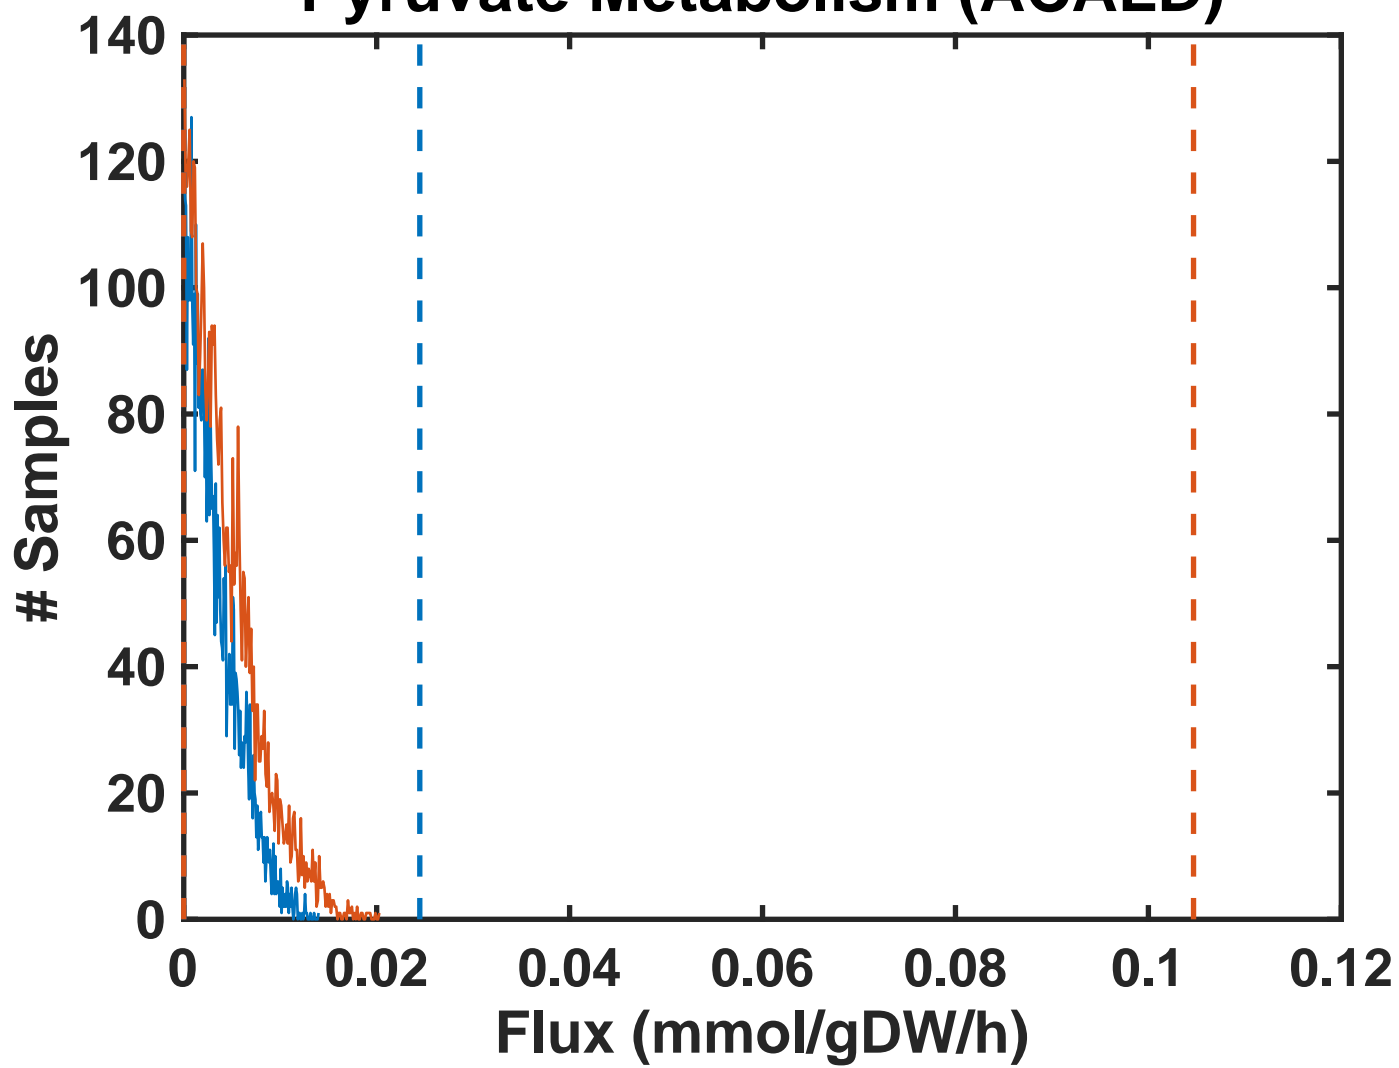

Supplement: s1 [file s1]

## Penicillin-Cephalosporin biosynthesis (CMC1)

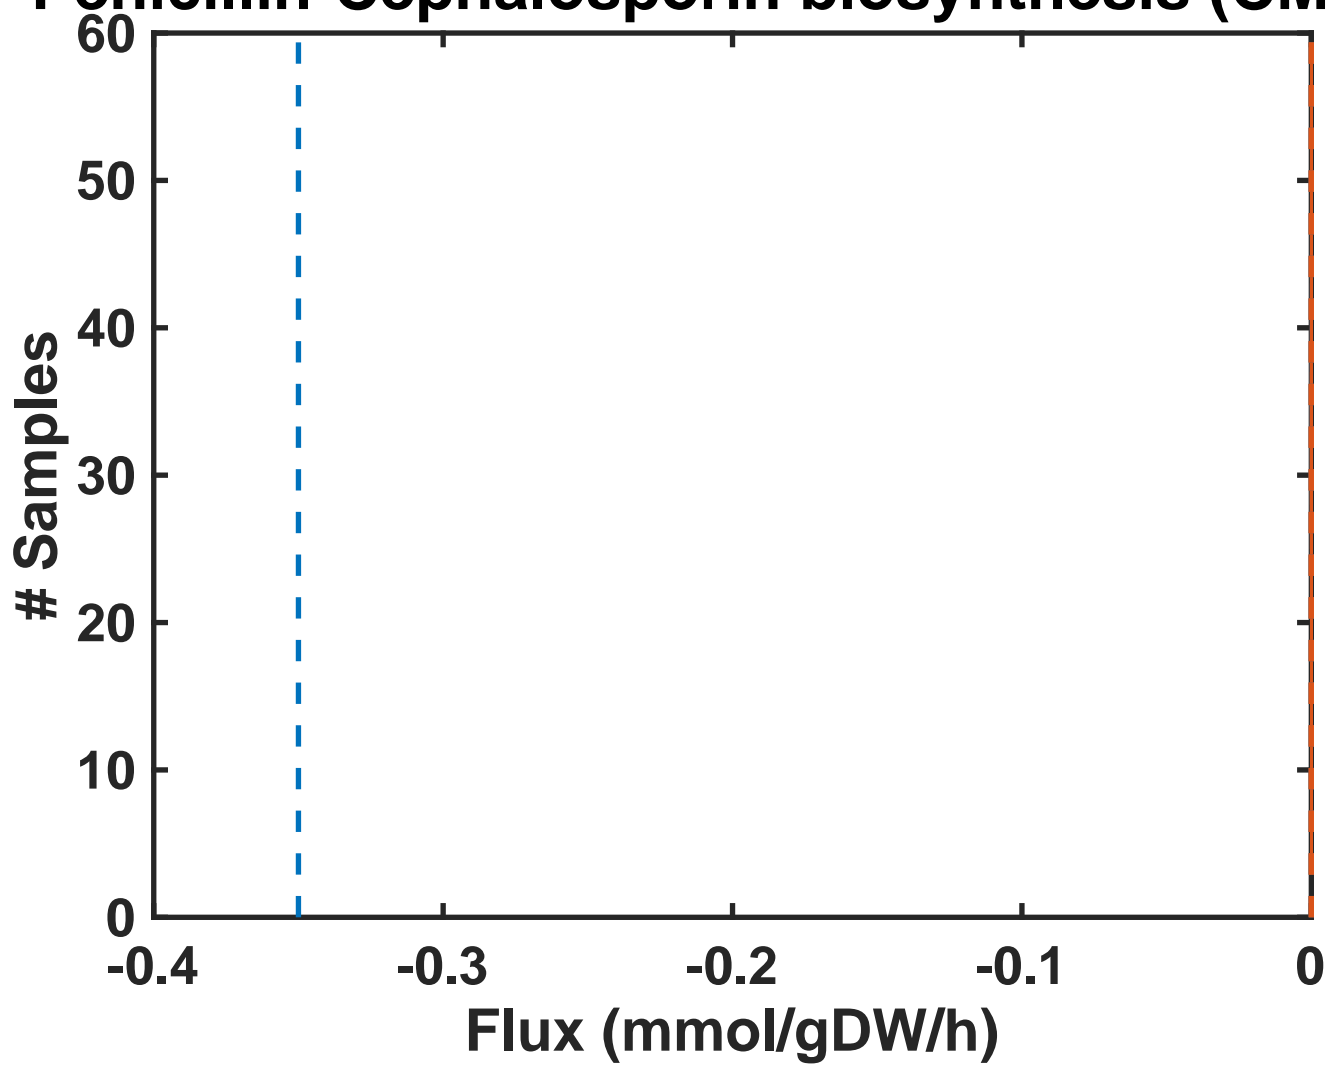

Supplement: s1 [file s1]

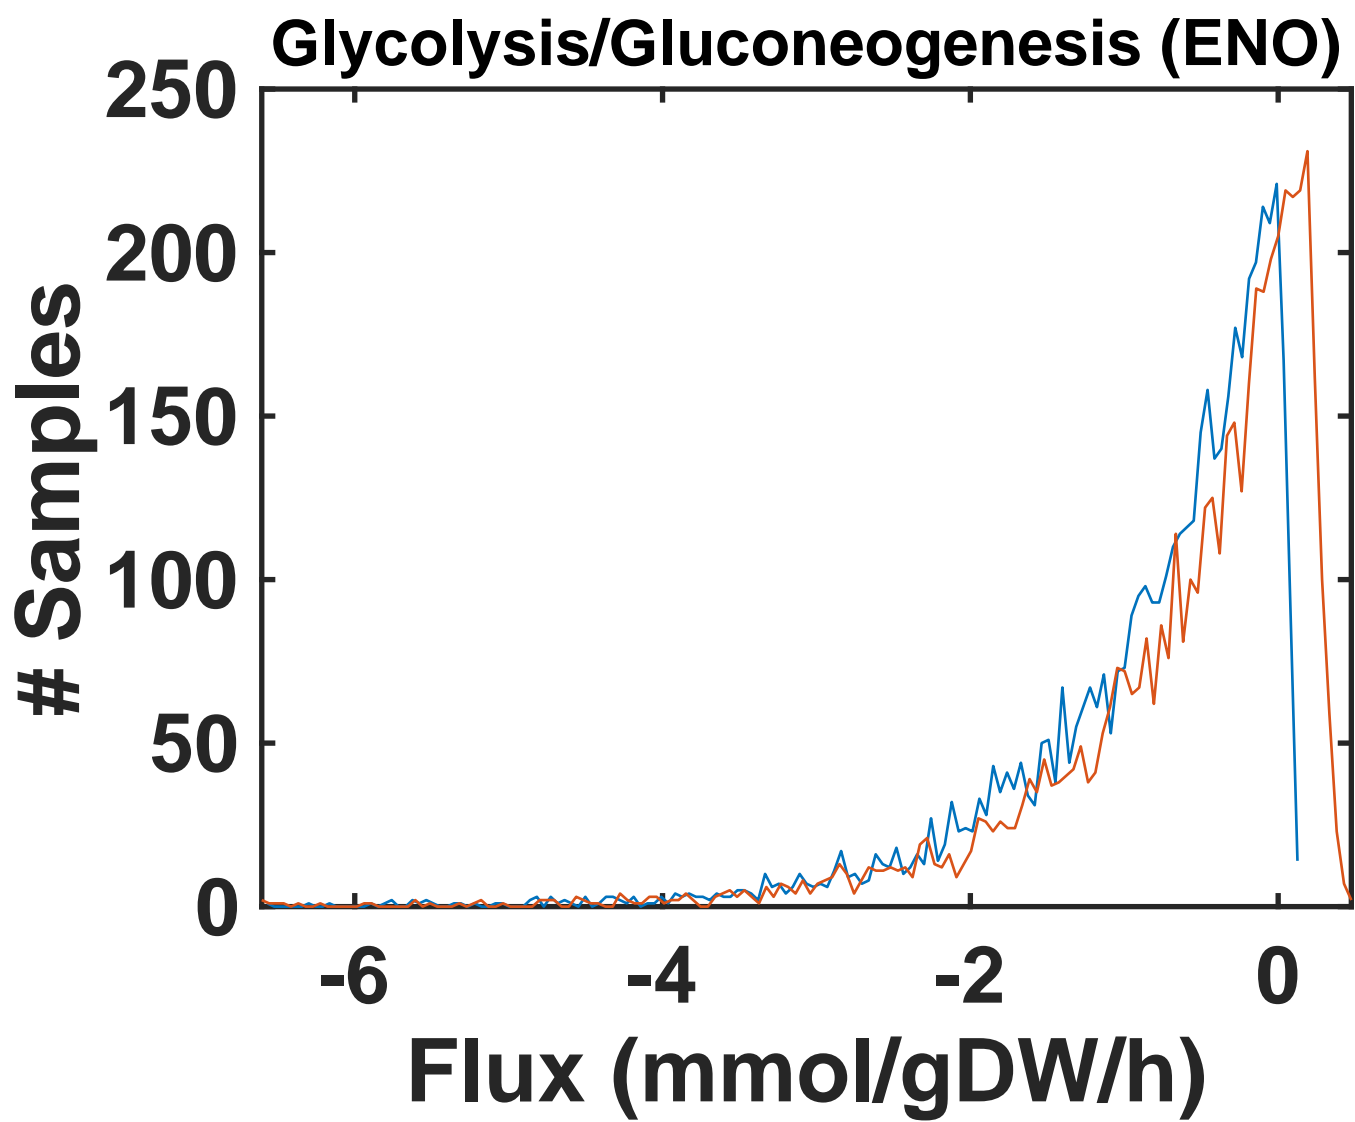

Supplement: s1 [file s1]

## Pentose Phosphate Pathway (TKT2)

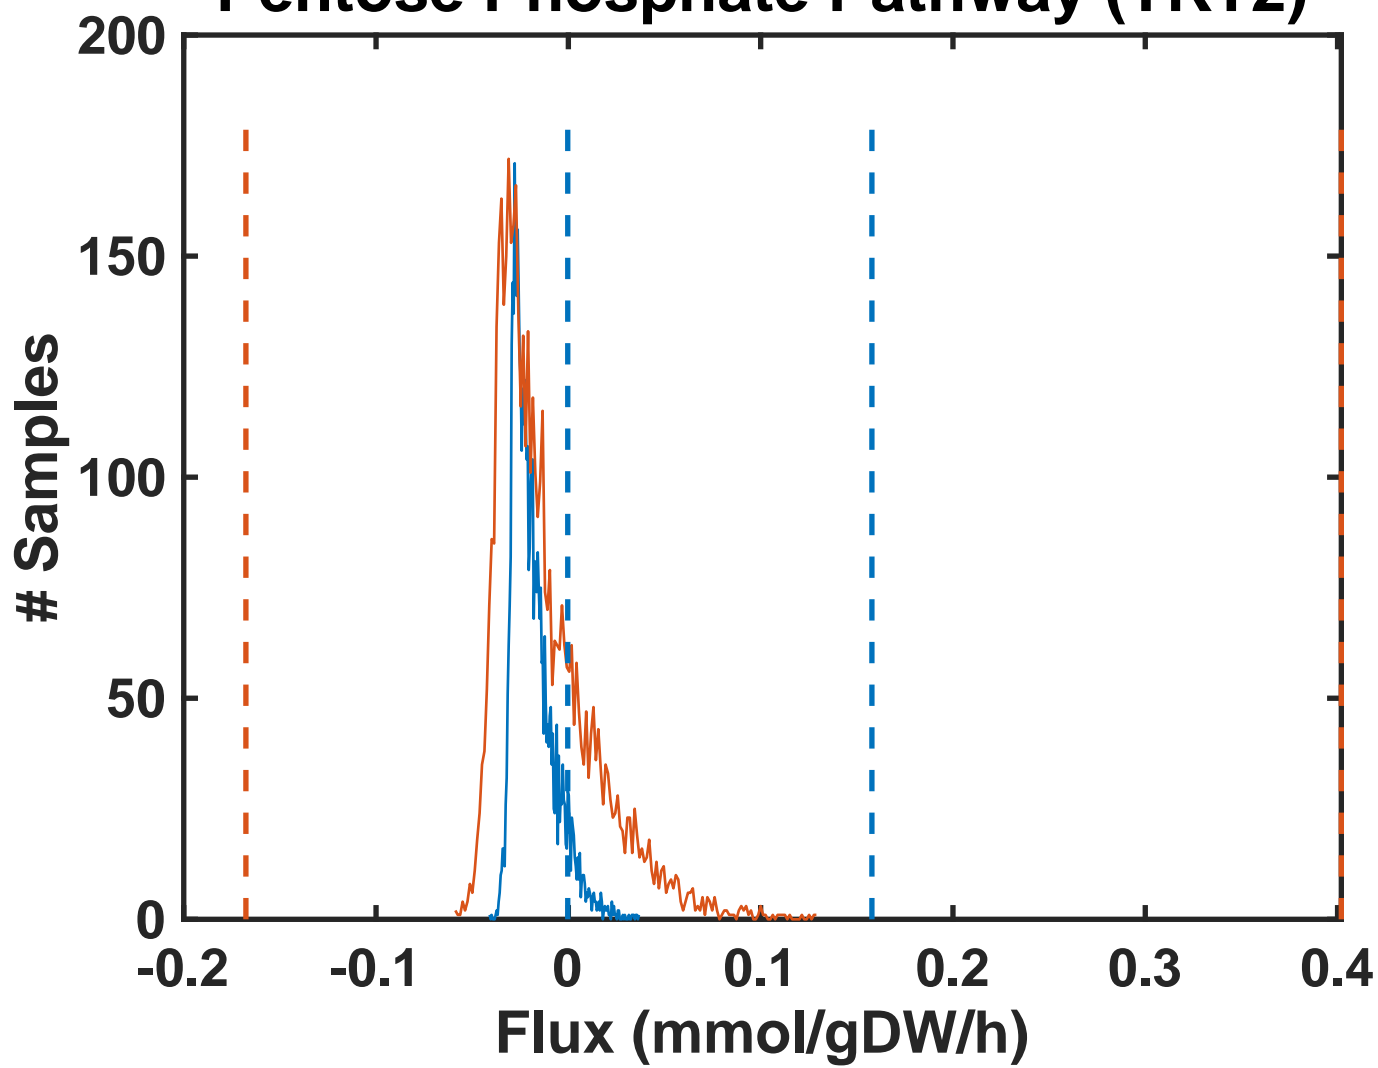

Supplement: s1 [file s1]

# Phosphoglycerolipid metabolism (G3PD1)

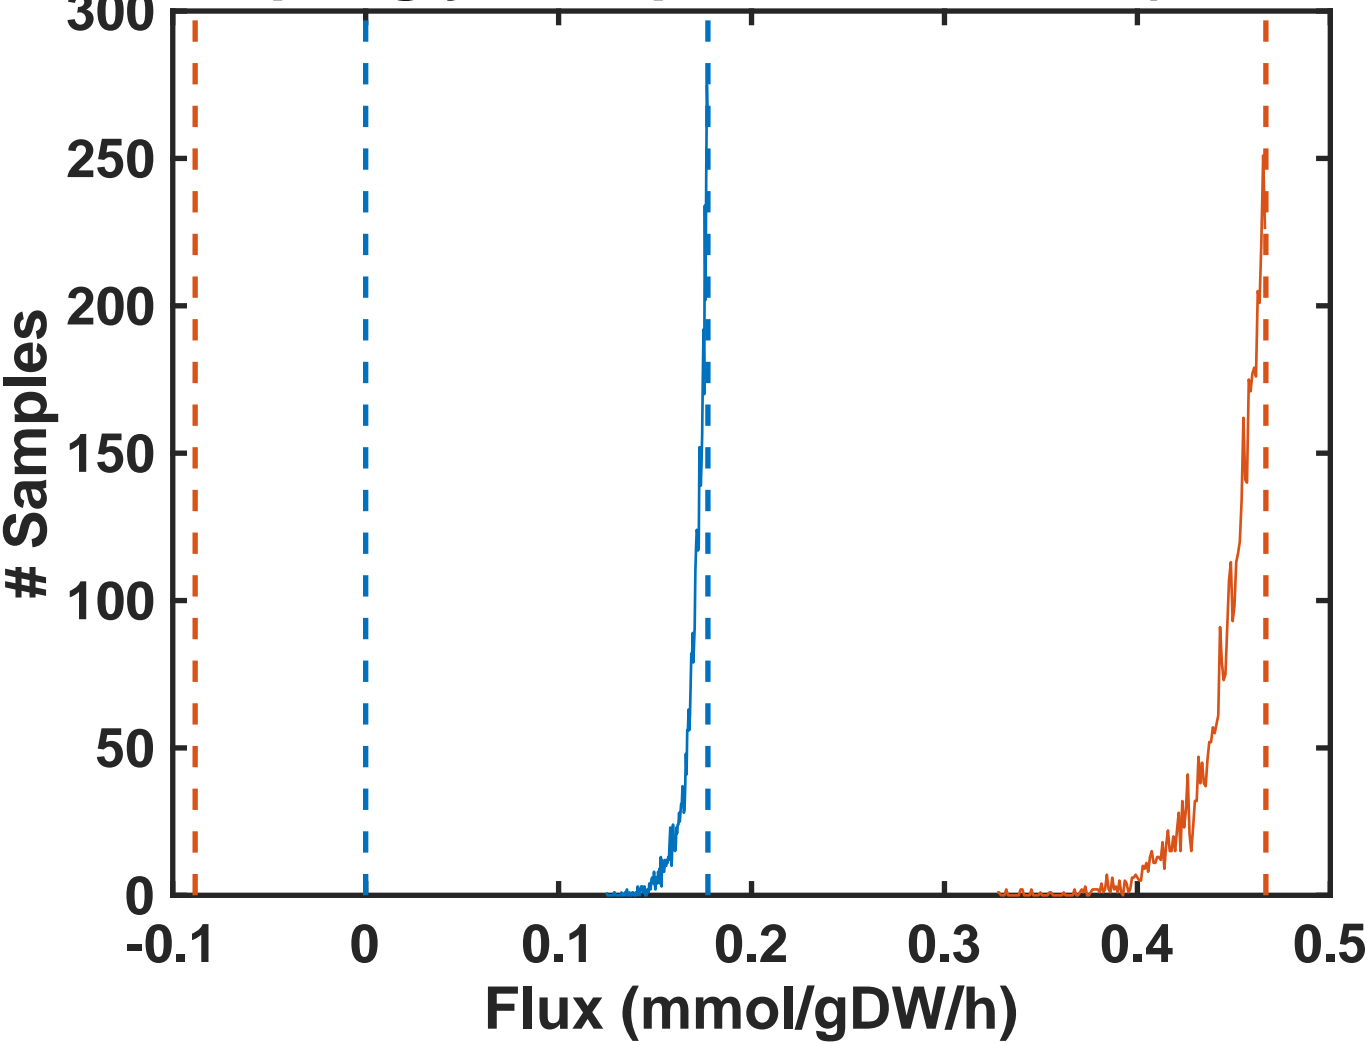

Supplement: s1 [file s1]

# Pyruvate Metabolism (ACALD)

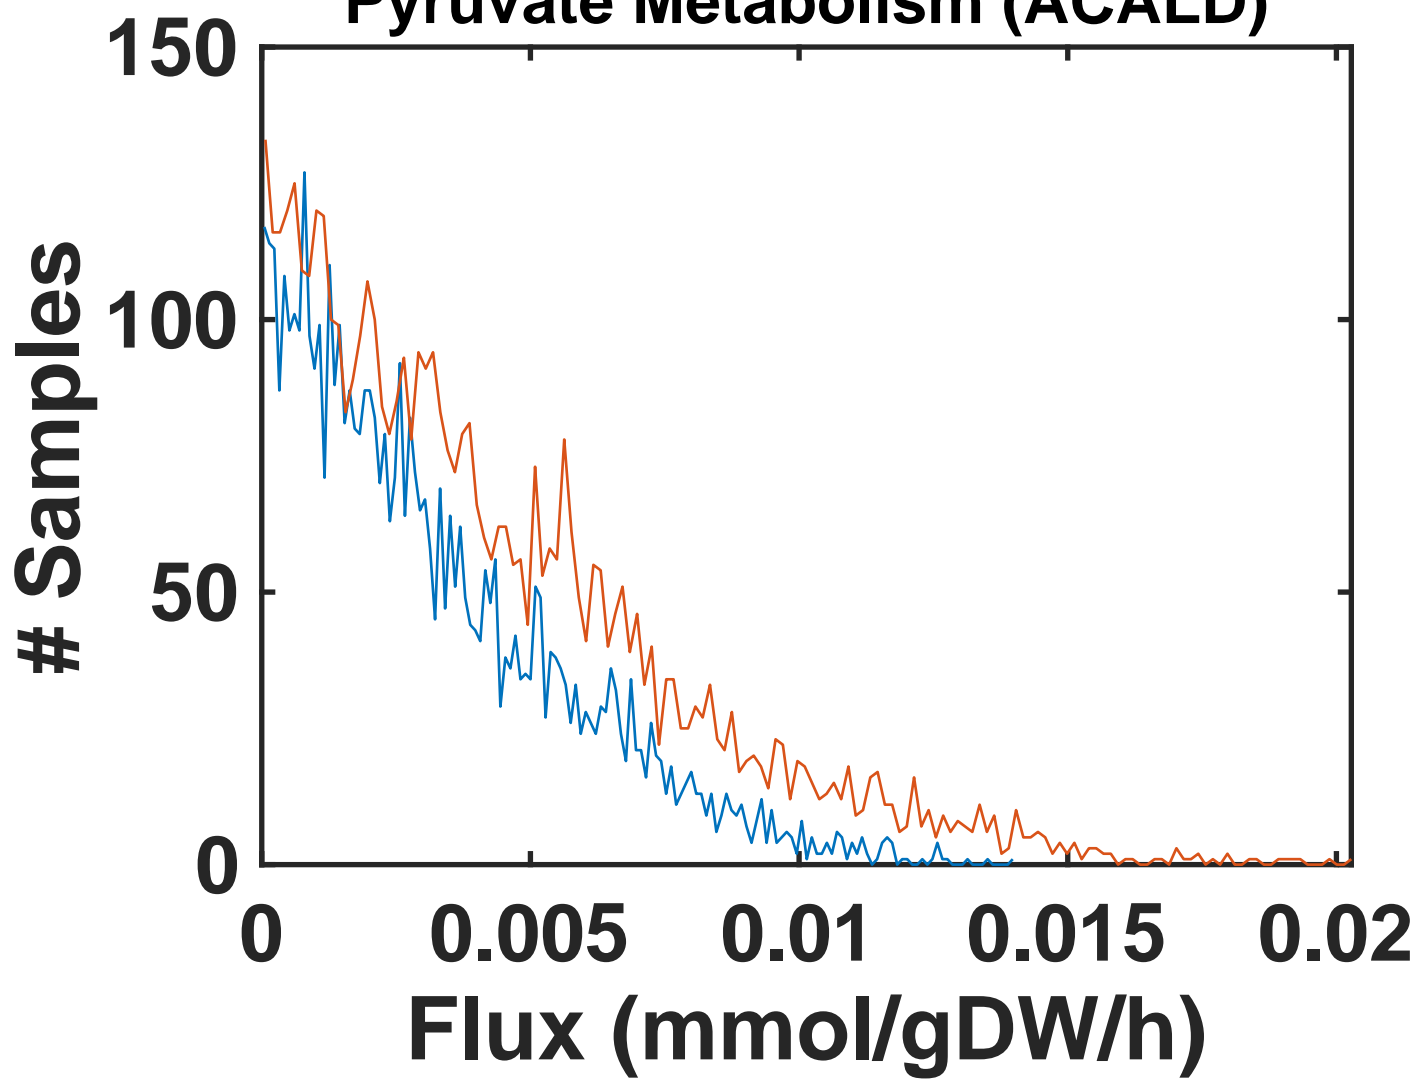

Supplement: s1 [file s1]
