# Supplementary figures and images for: TCA Cycle and Its Relationship with Clavulanic Acid Production: A Further Interpretation by Using a Reduced Genome-Scale Metabolic Model of Streptomyces clavuligerus (part 2 of 2)
Source: MDPI journal article supplement (doi:10.3390/bioengineering8080103), 2021-07-22

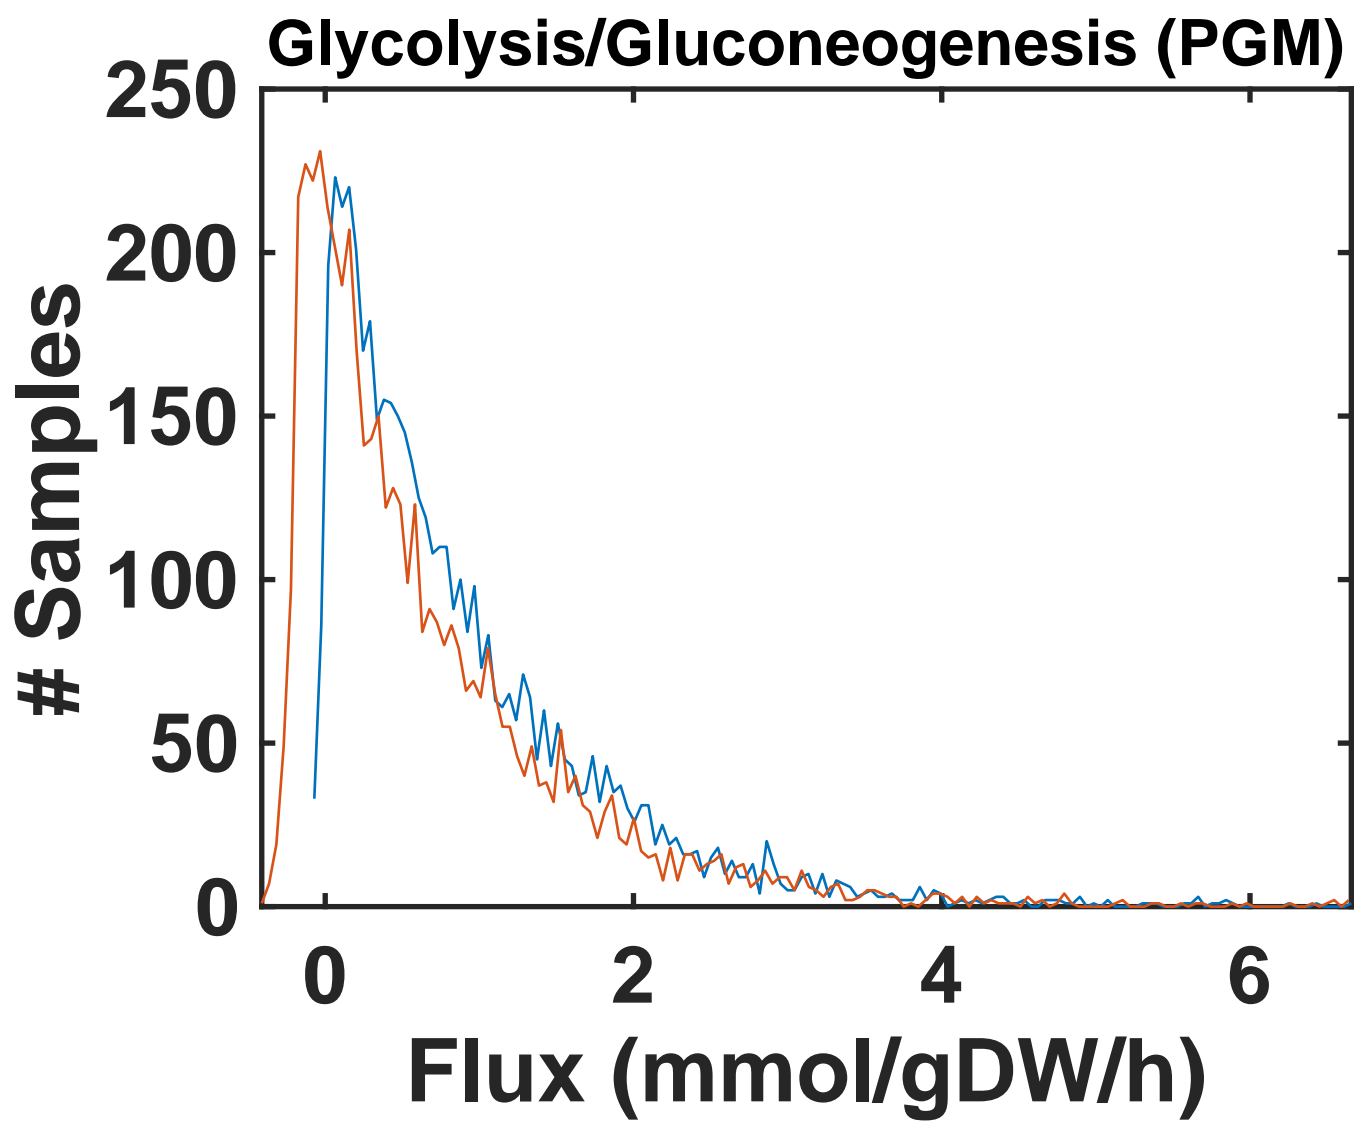

Supplement: s1 [file s1]

## Clavulanic acid biosynthesis (CS3)

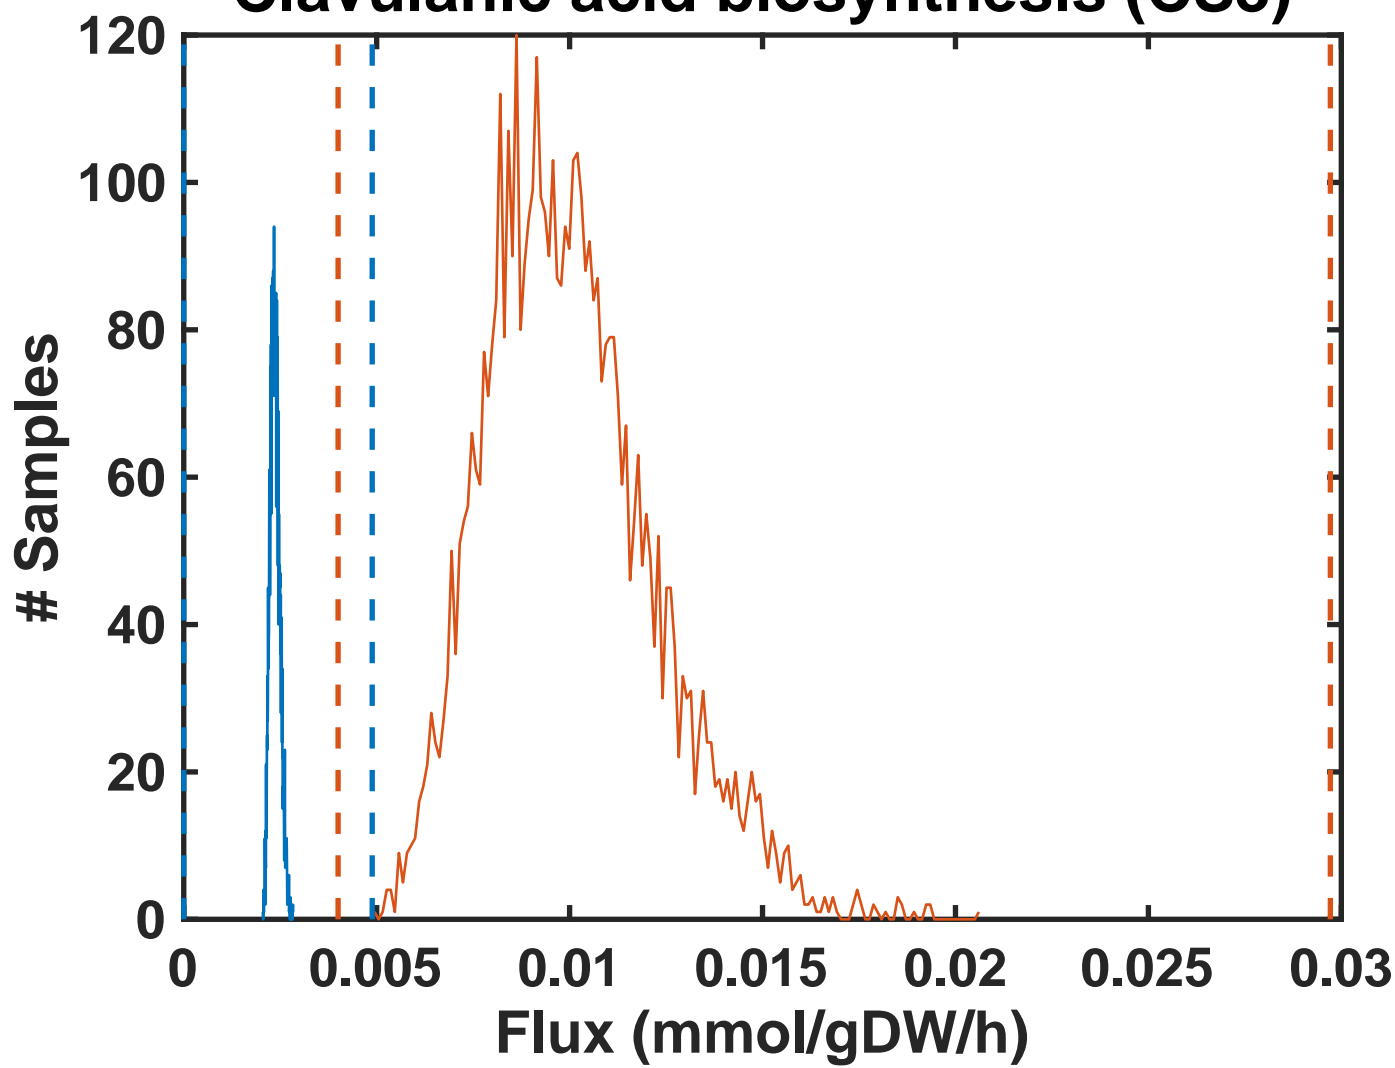

Supplement: s1 [file s1]

# Citric Acid Cycle (SUCOAS)

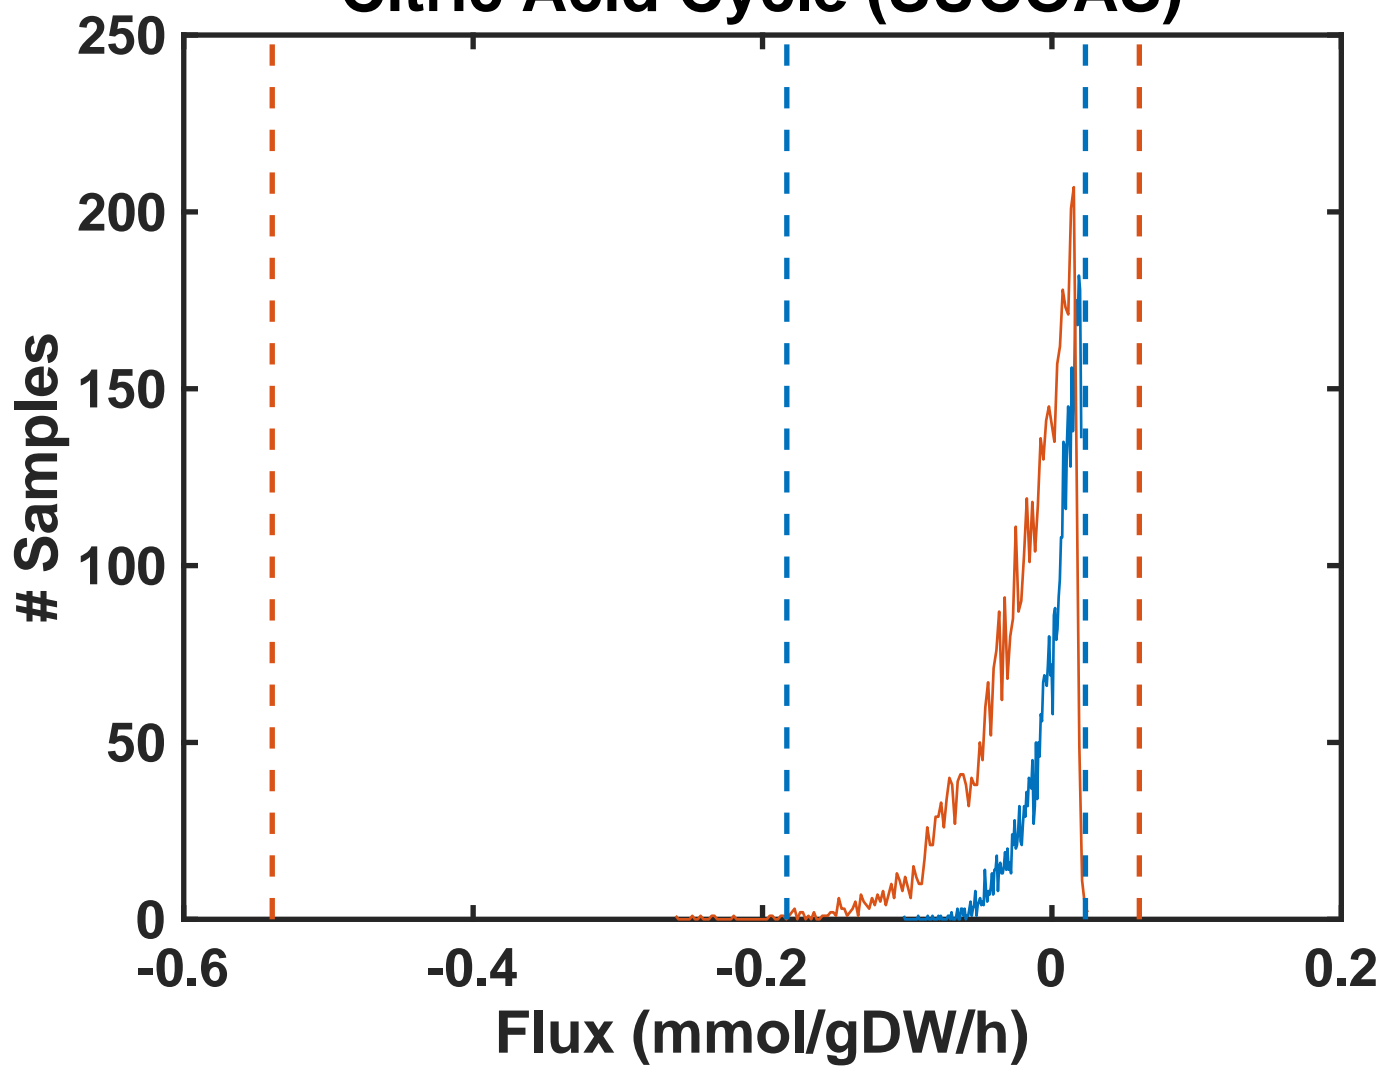

Supplement: s1 [file s1]

## Pentose Phosphate Pathway (GND)

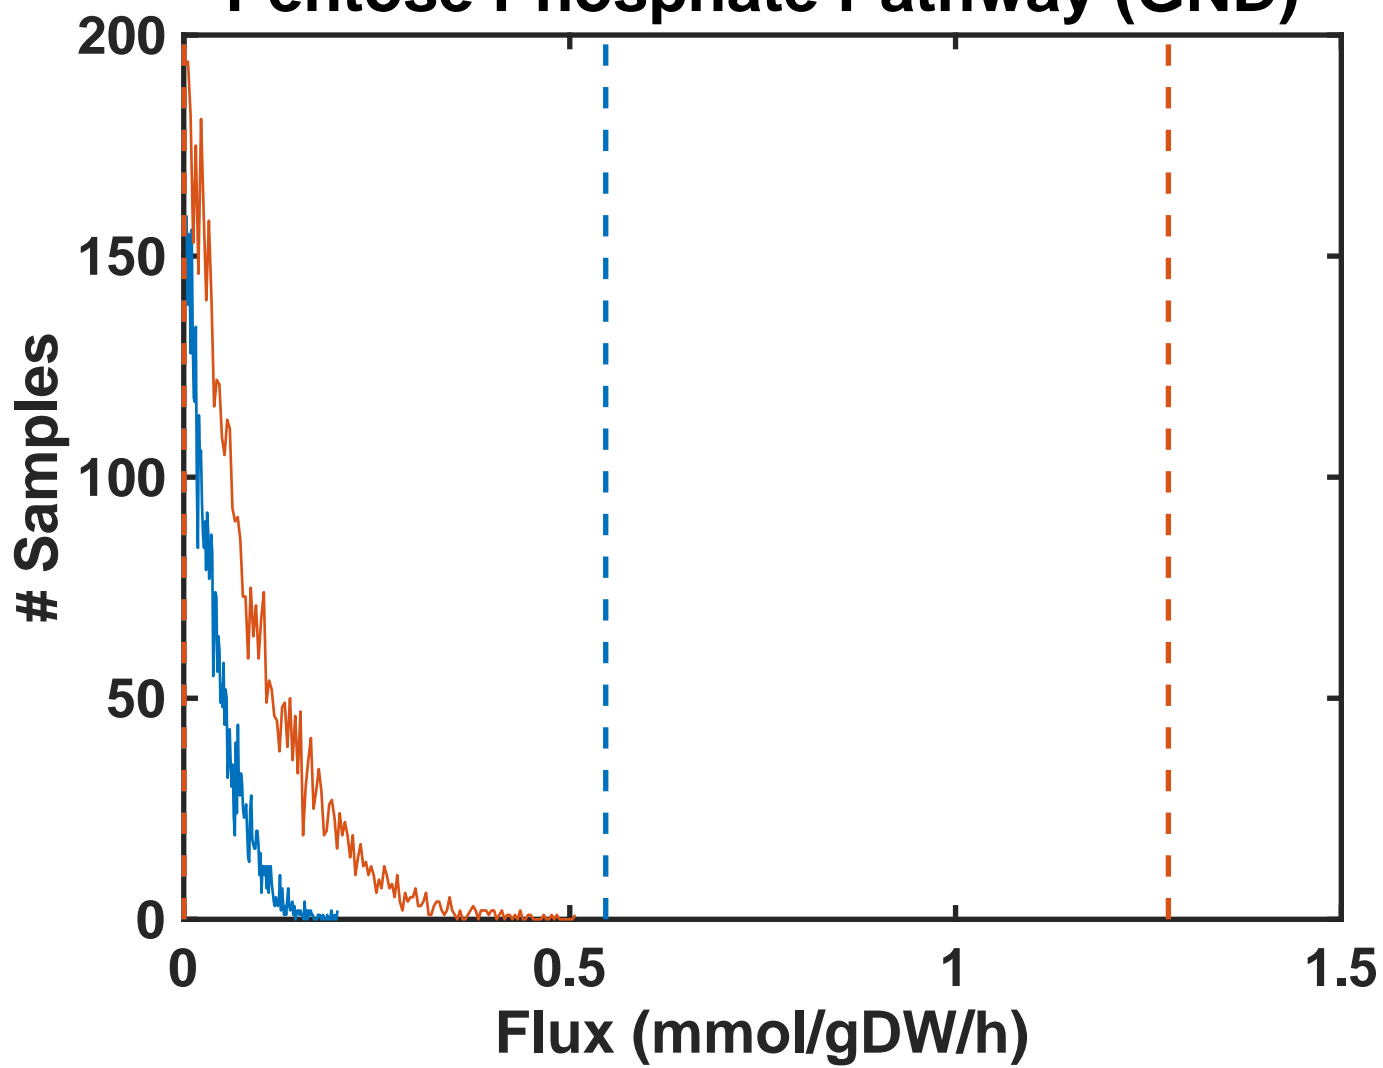

Supplement: s1 [file s1]

## Pyruvate Metabolism (PTAr)

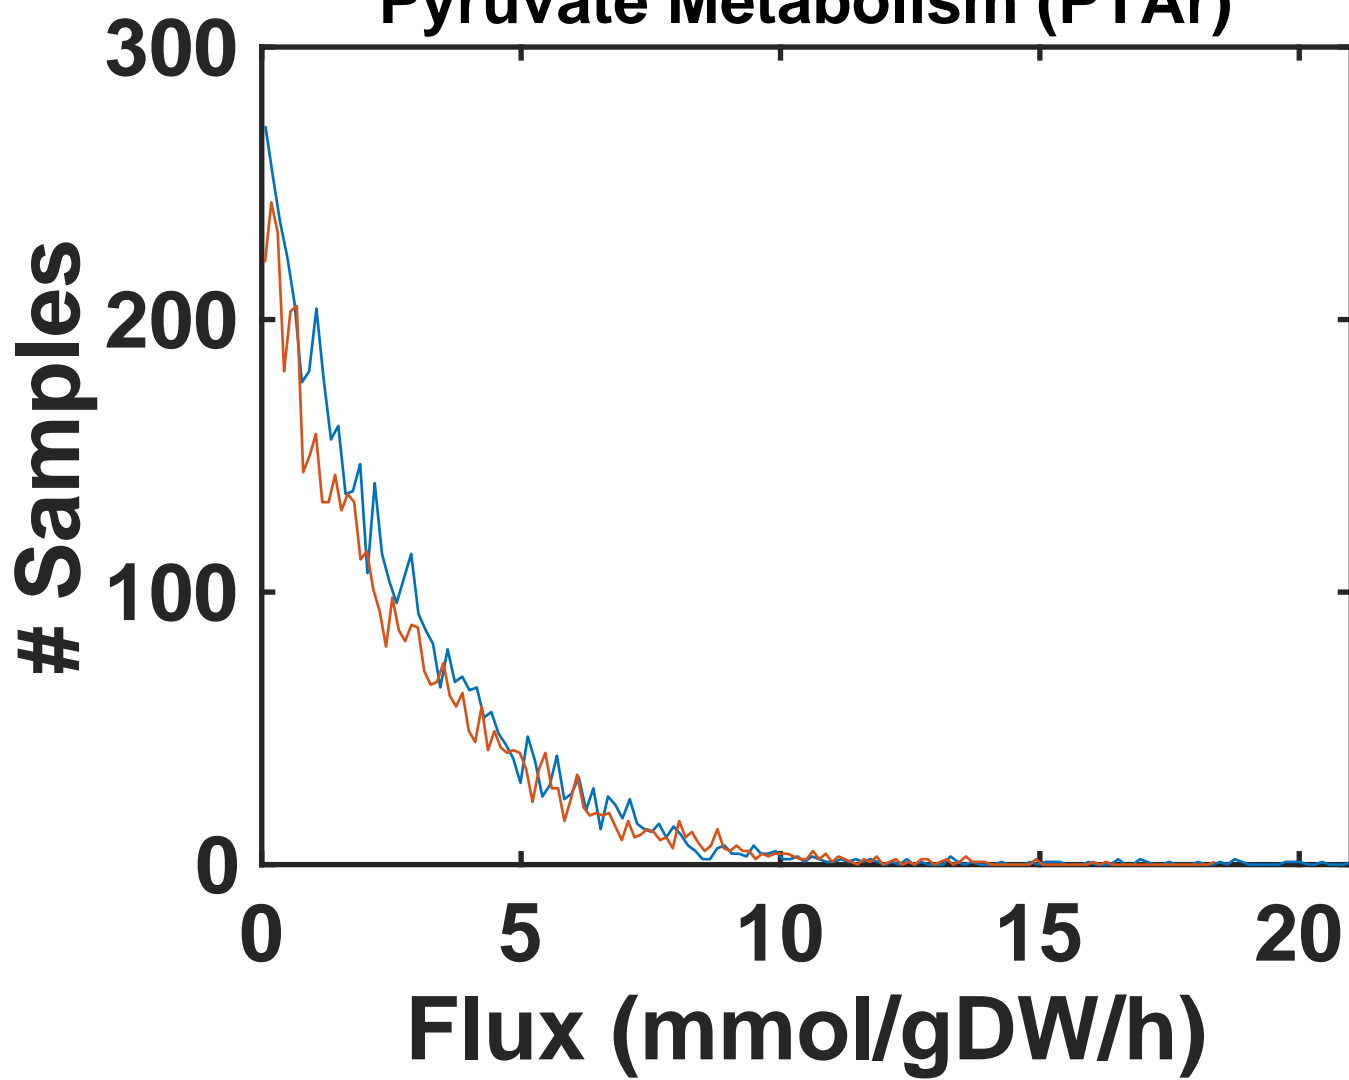

Supplement: s1 [file s1]

# Citric Acid Cycle (CITL)

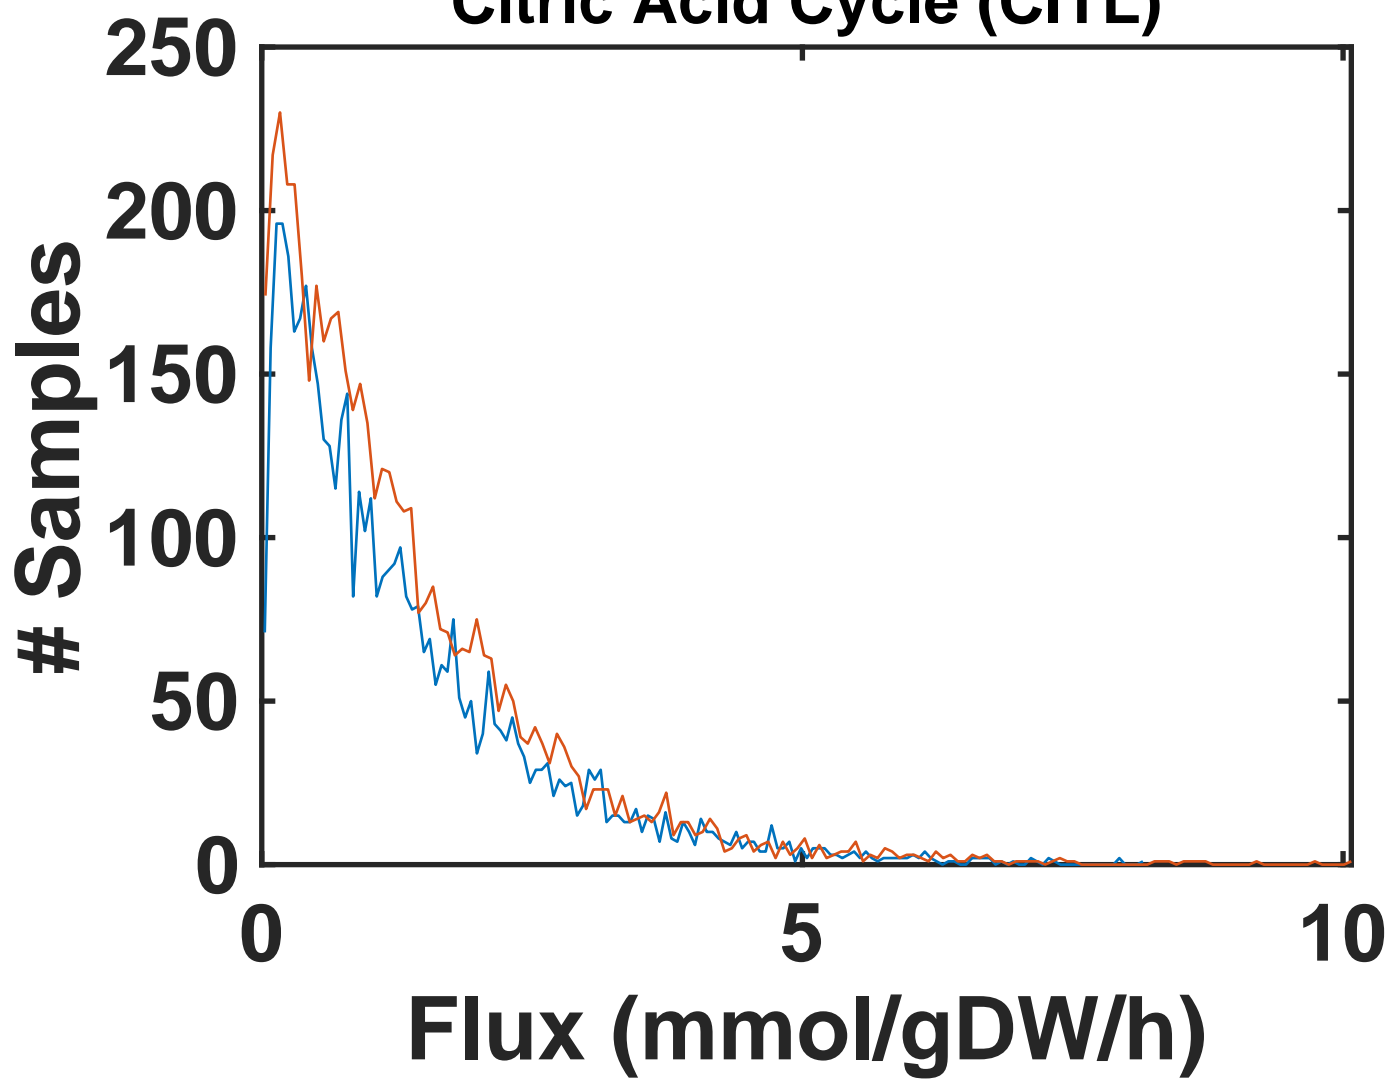

Supplement: s1 [file s1]

# Citric Acid Cycle (MDH3)

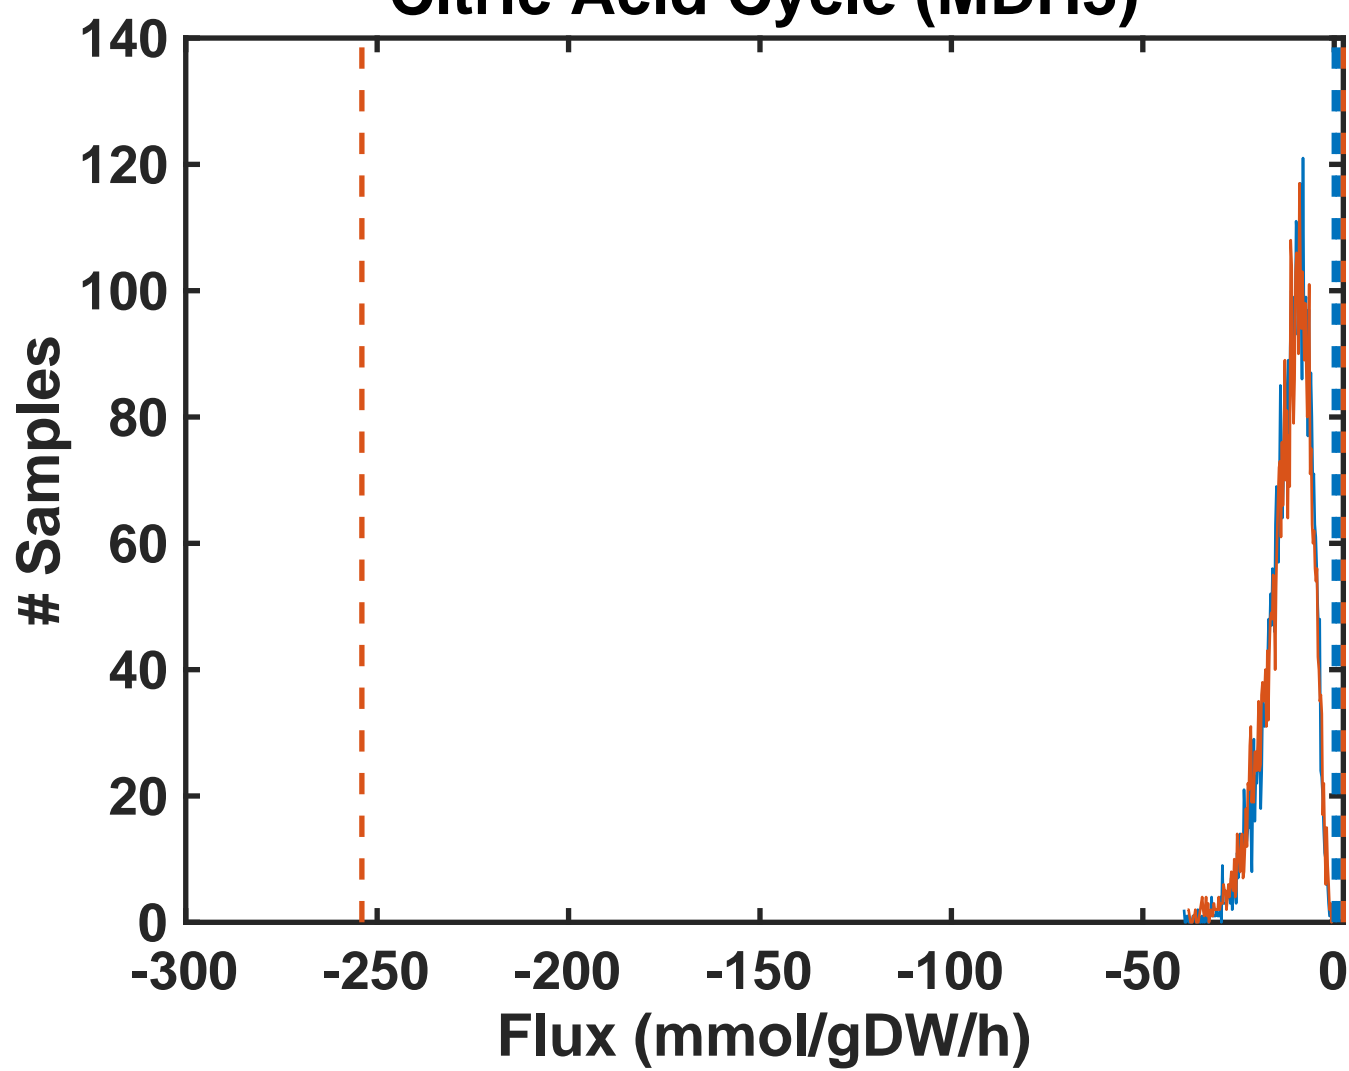

Supplement: s1 [file s1]

## Citric Acid Cycle (ACONT)

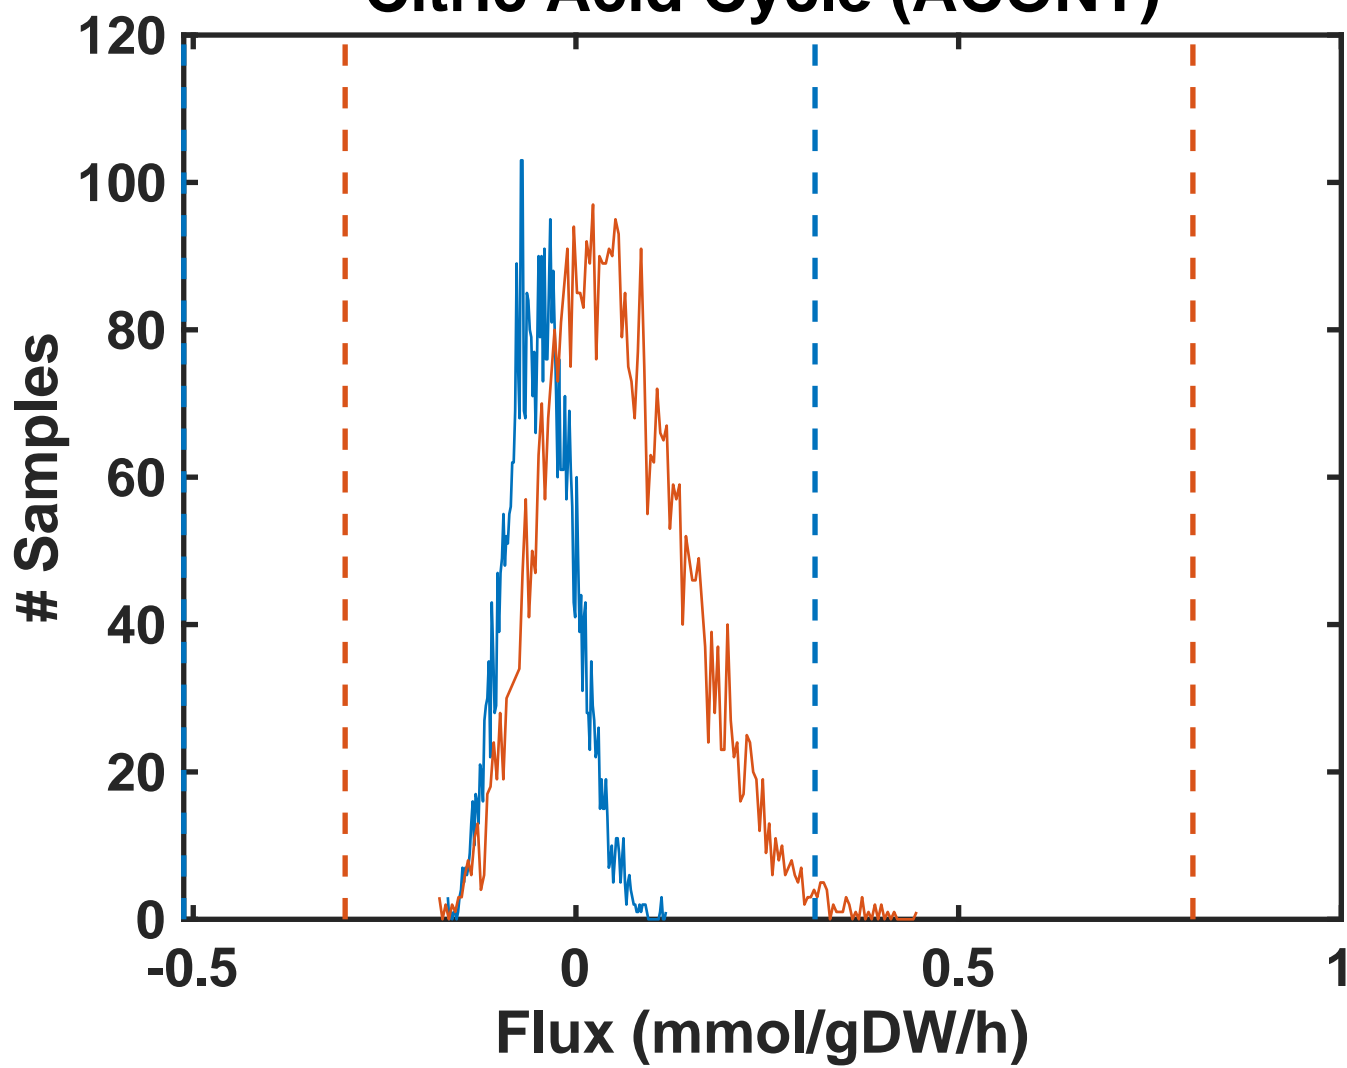

Supplement: s1 [file s1]

(LMPD<sub>3</sub>arg-L<sub>c</sub>)

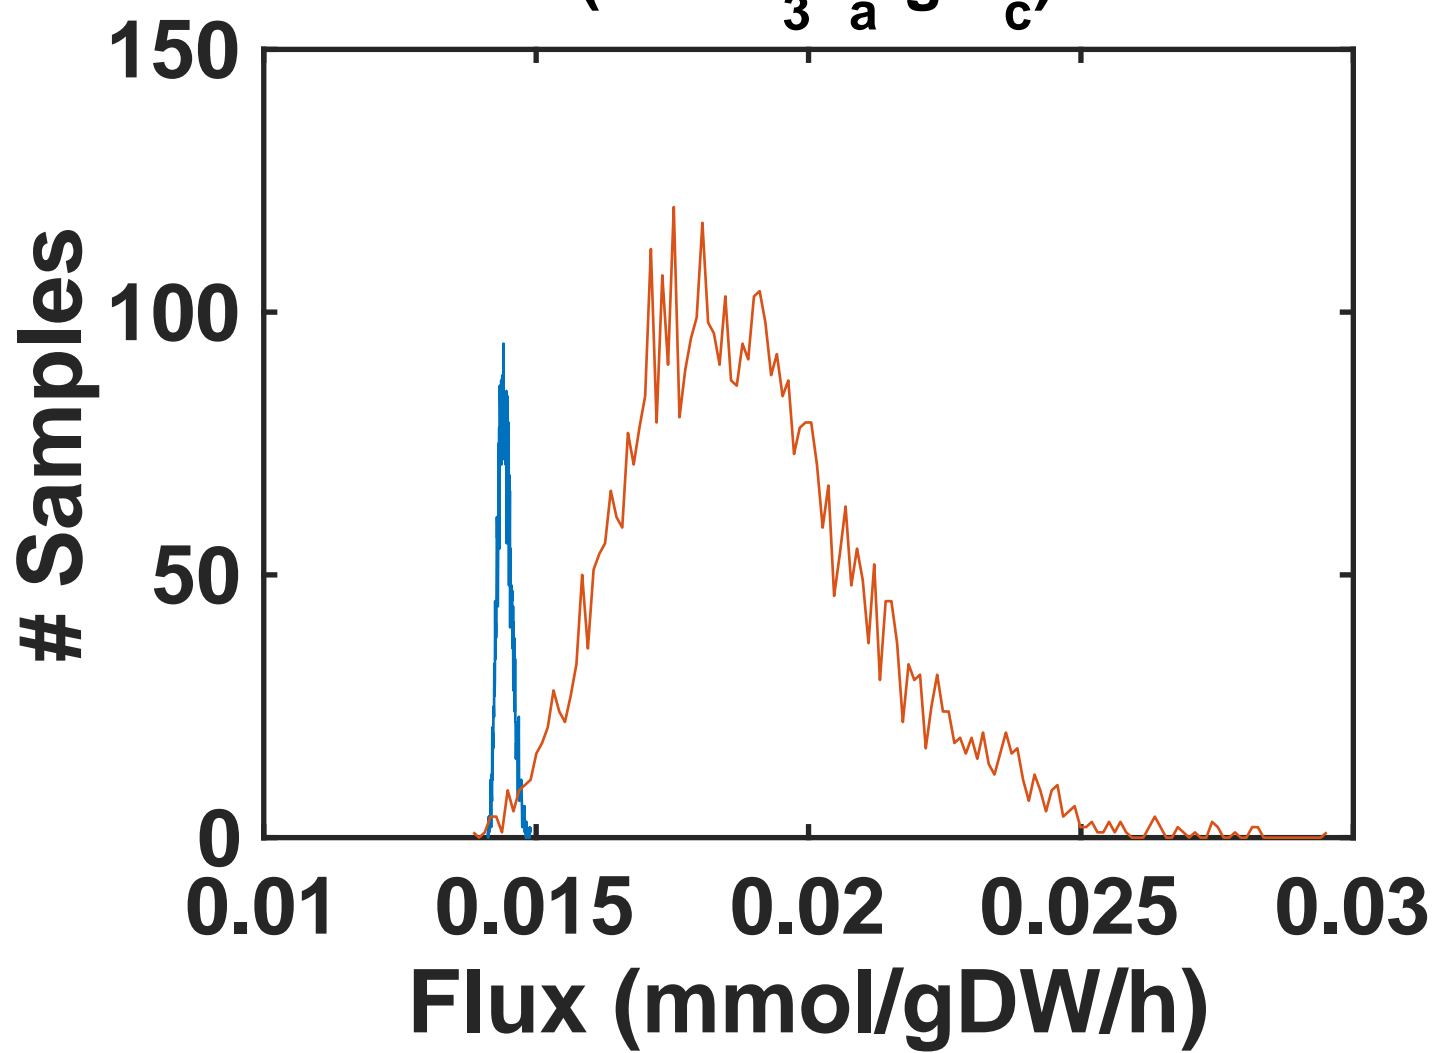

Supplement: s1 [file s1]

# Citric Acid Cycle (MDH2)

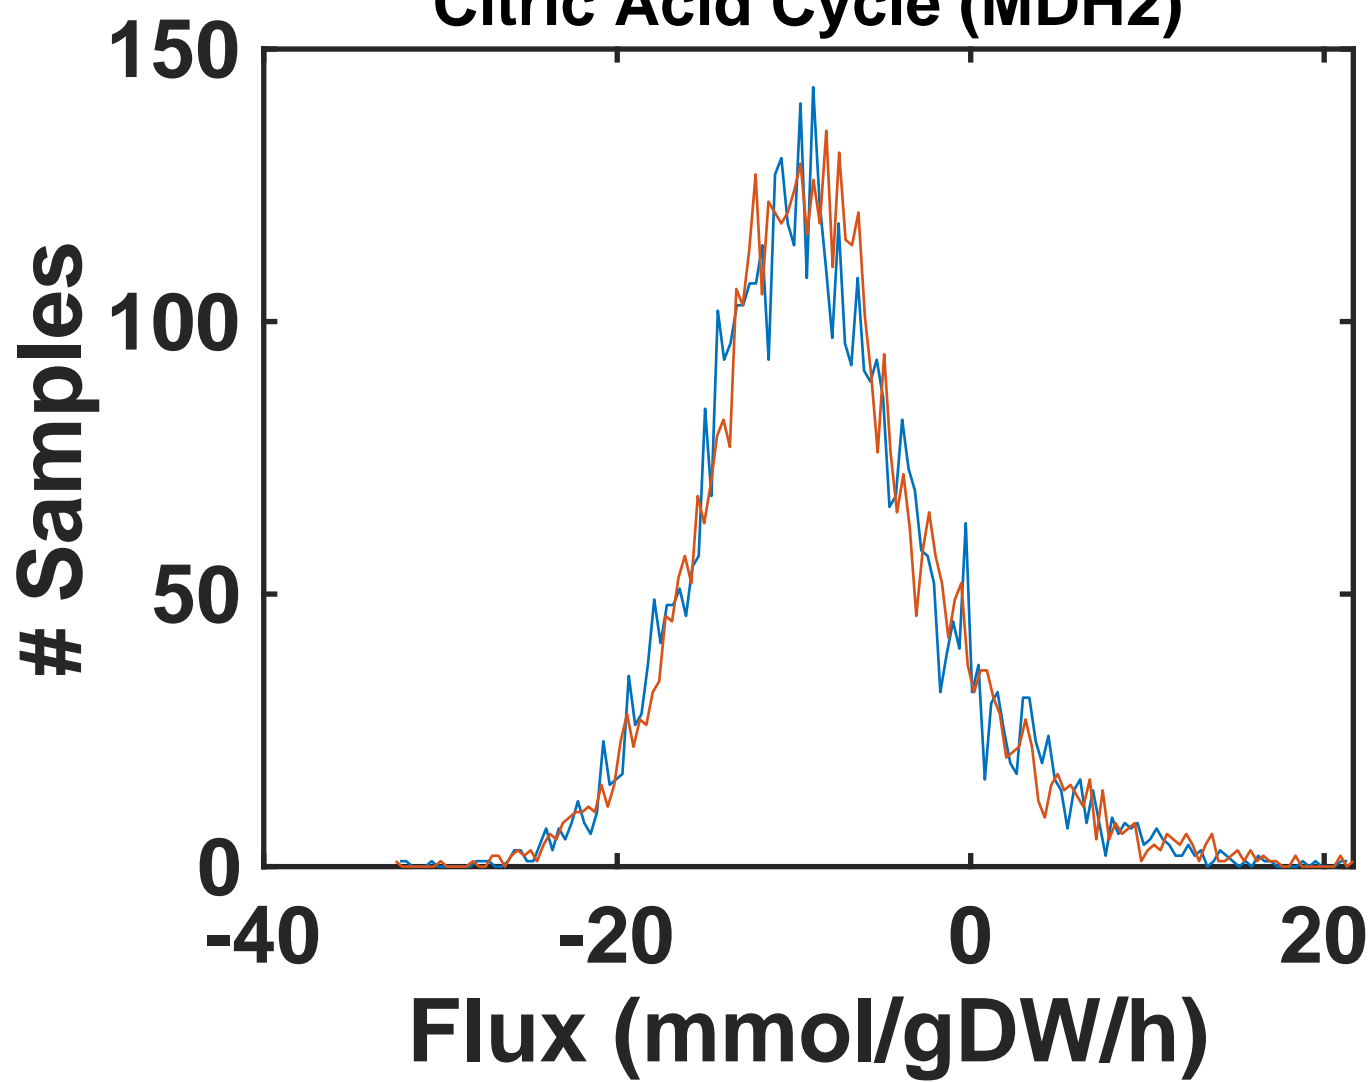

Supplement: s1 [file s1]

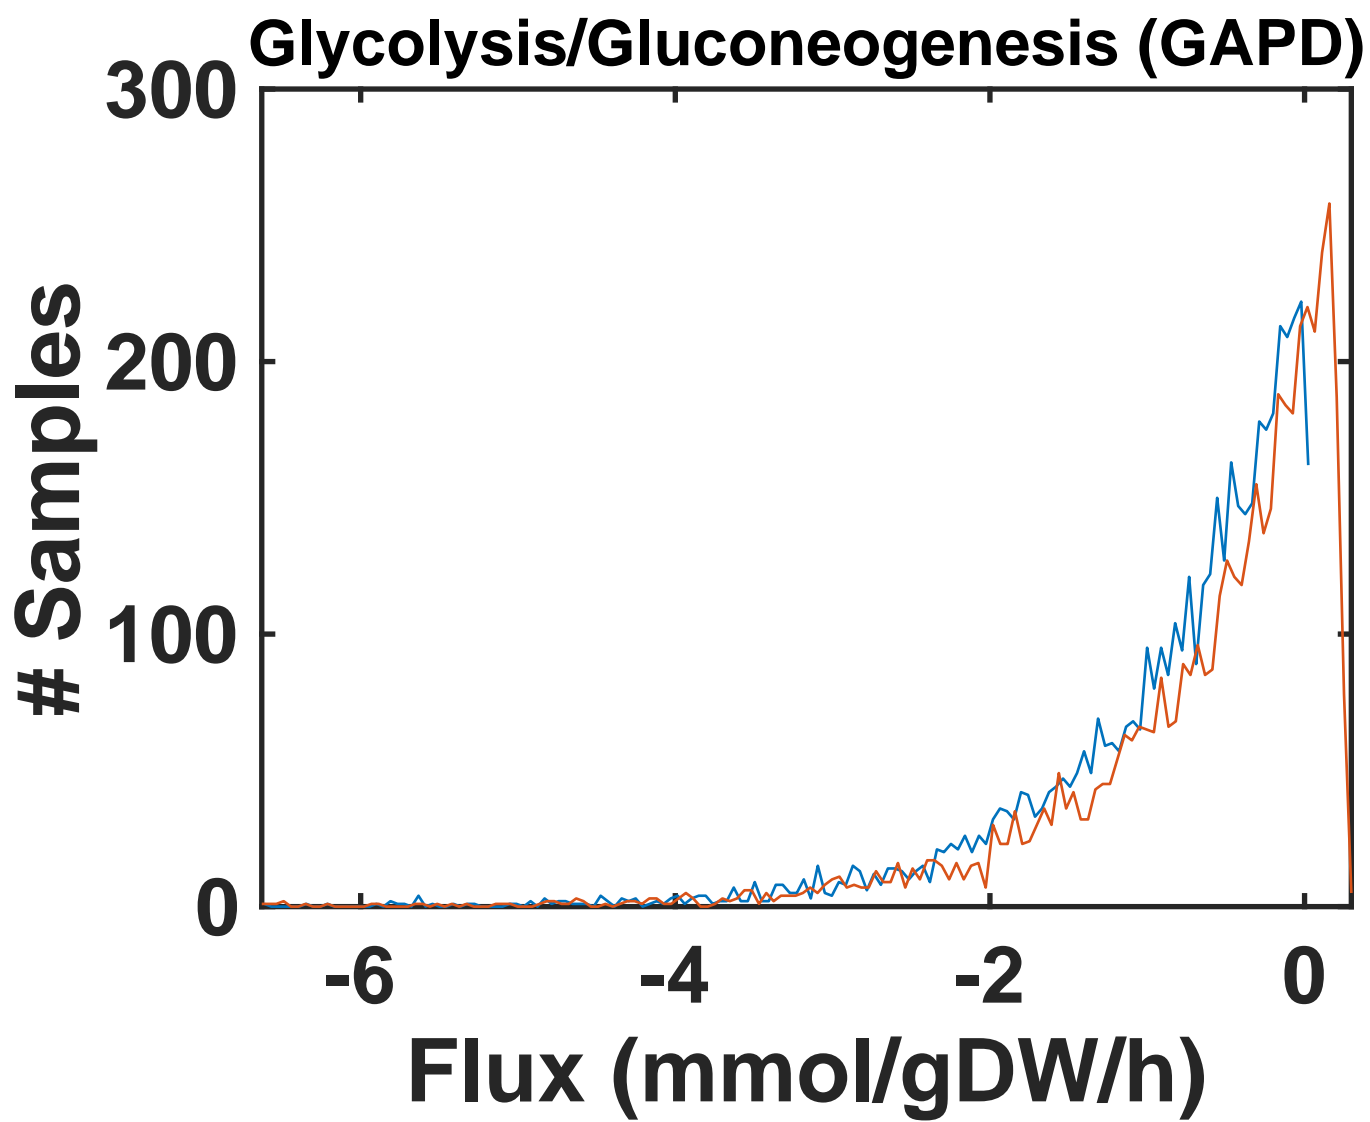

Supplement: s1 [file s1]

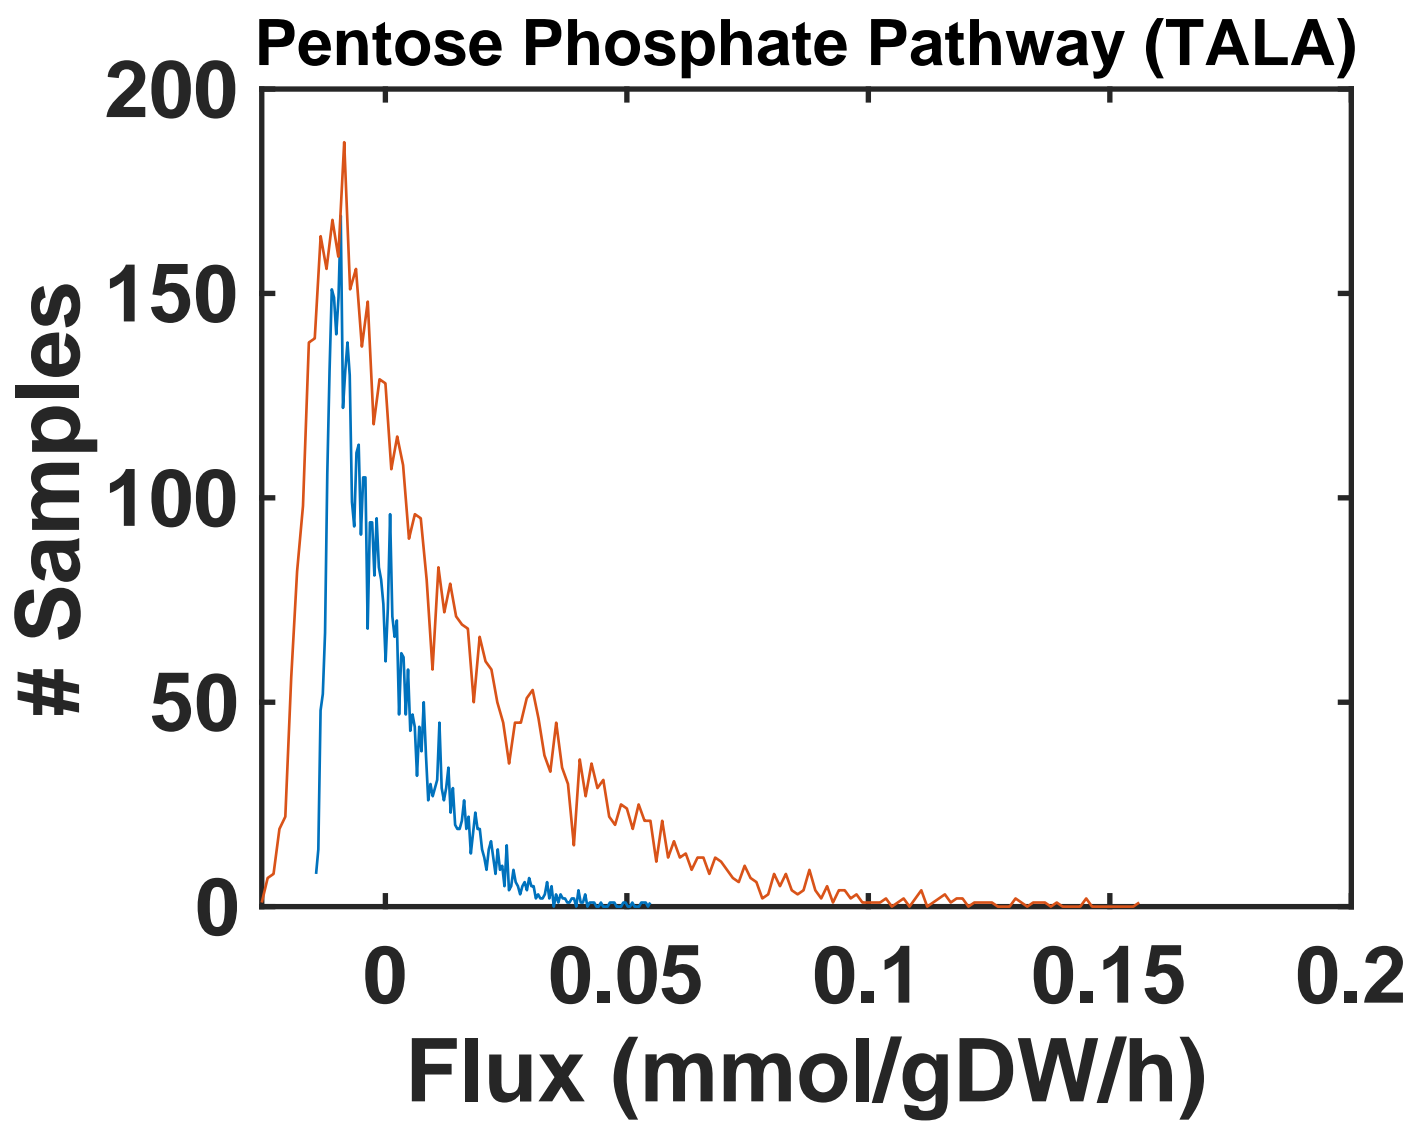

Supplement: s1 [file s1]

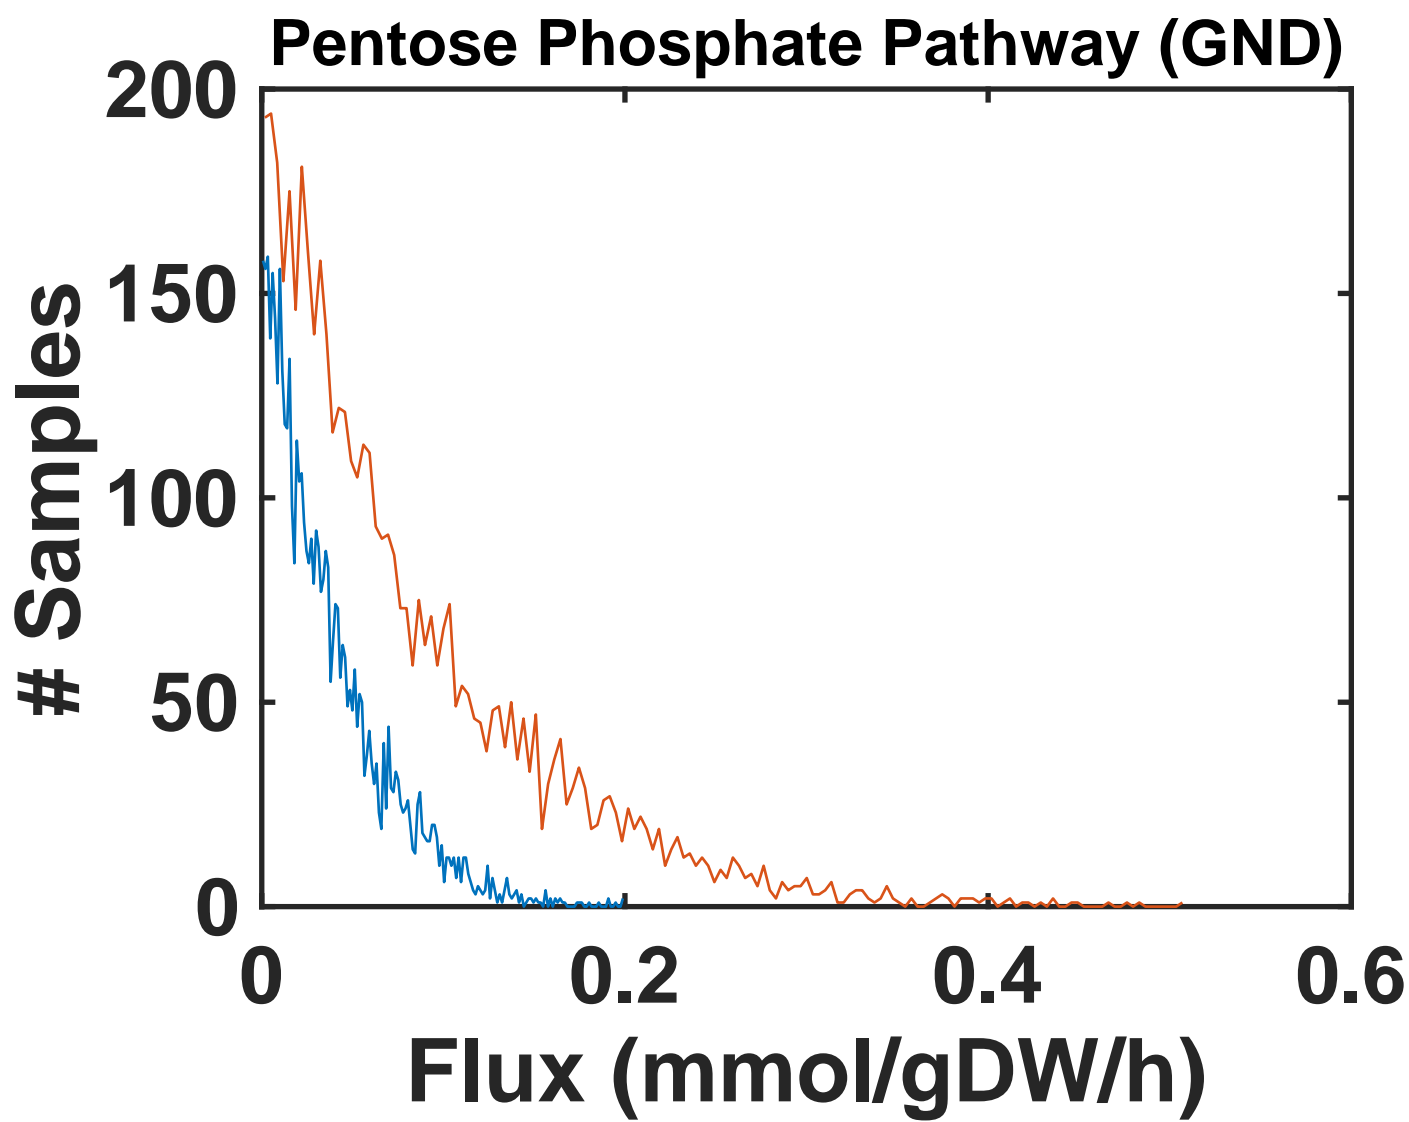

Supplement: s1 [file s1]

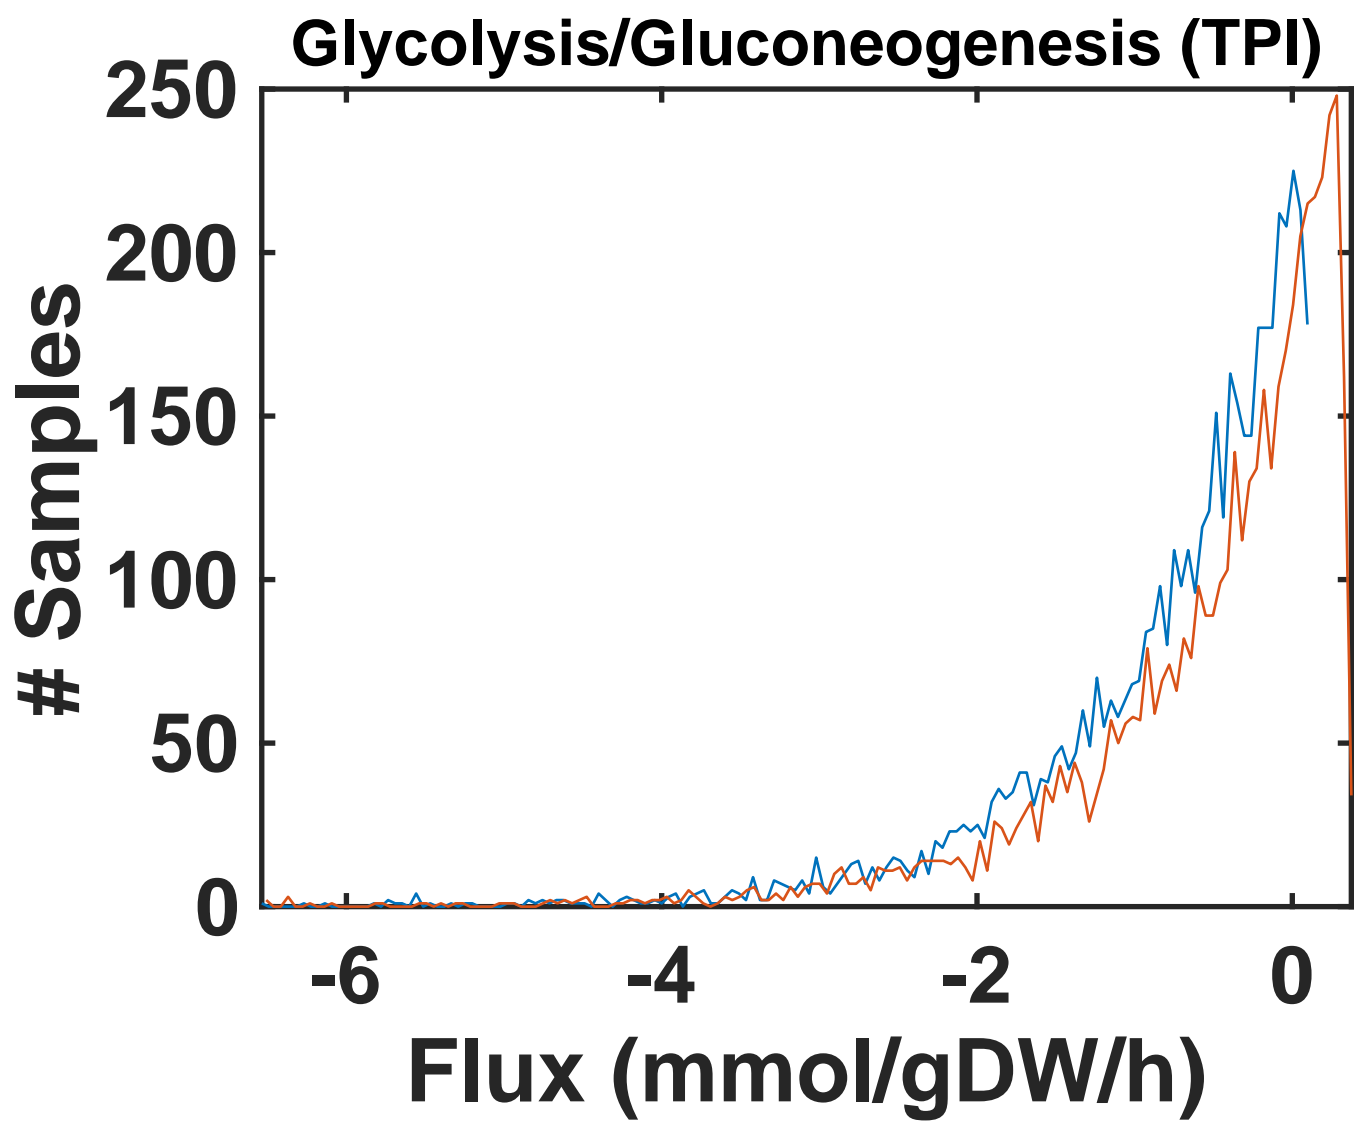

Supplement: s1 [file s1]

## Oxidative Phosphorylation (NADH5)

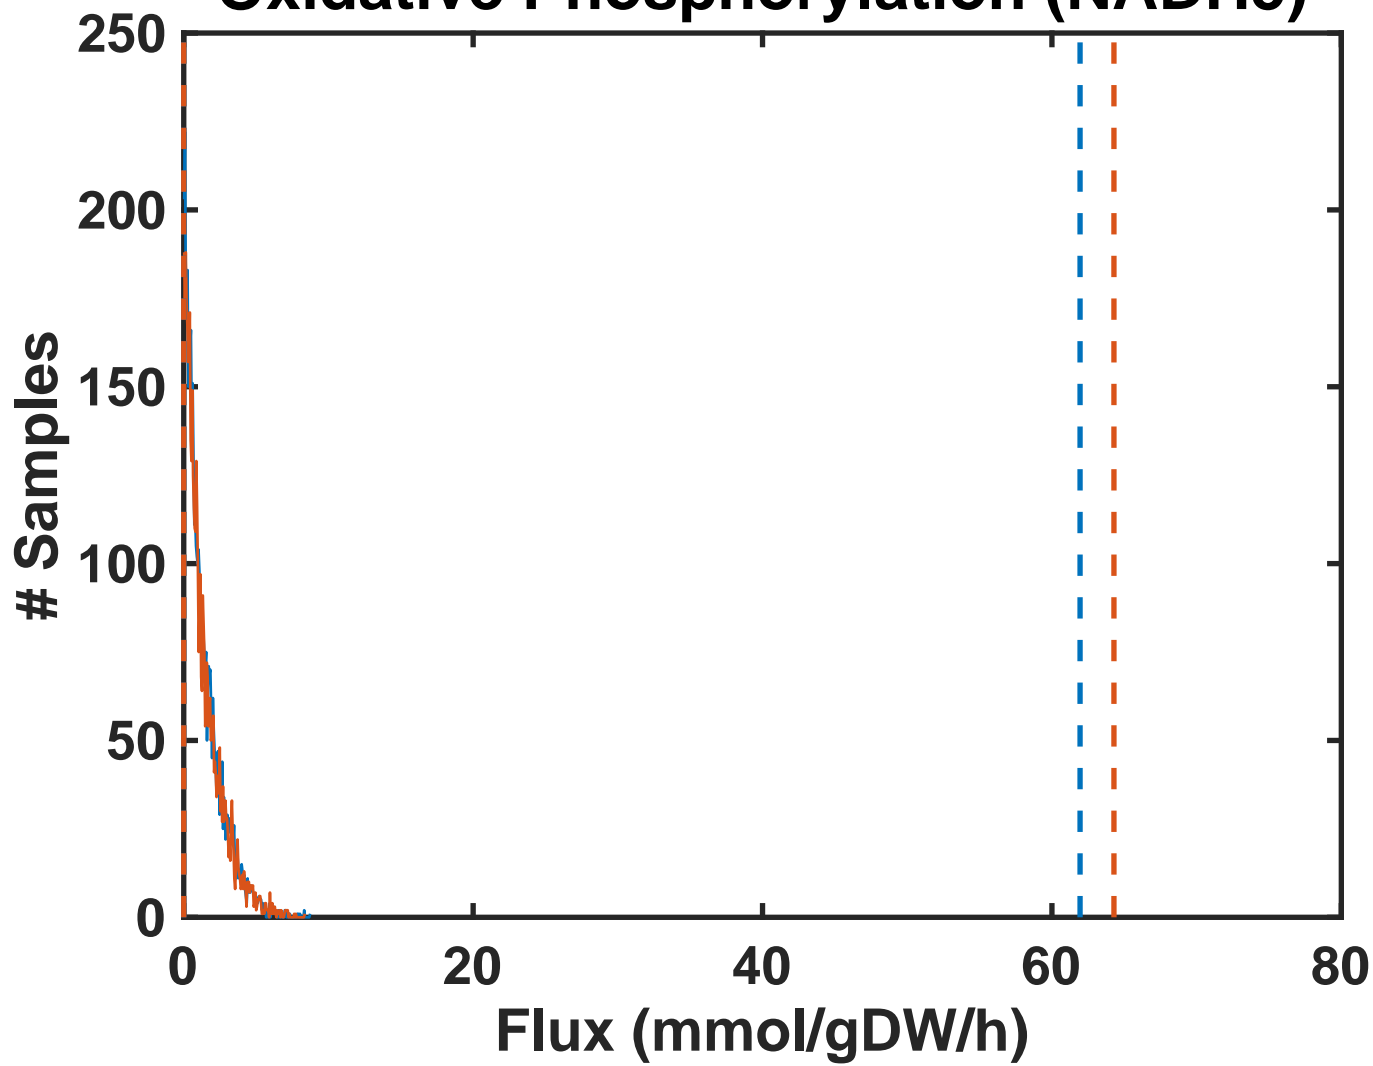

Supplement: s1 [file s1]

Exchange ( $EX_{c\ o2_e}$ )

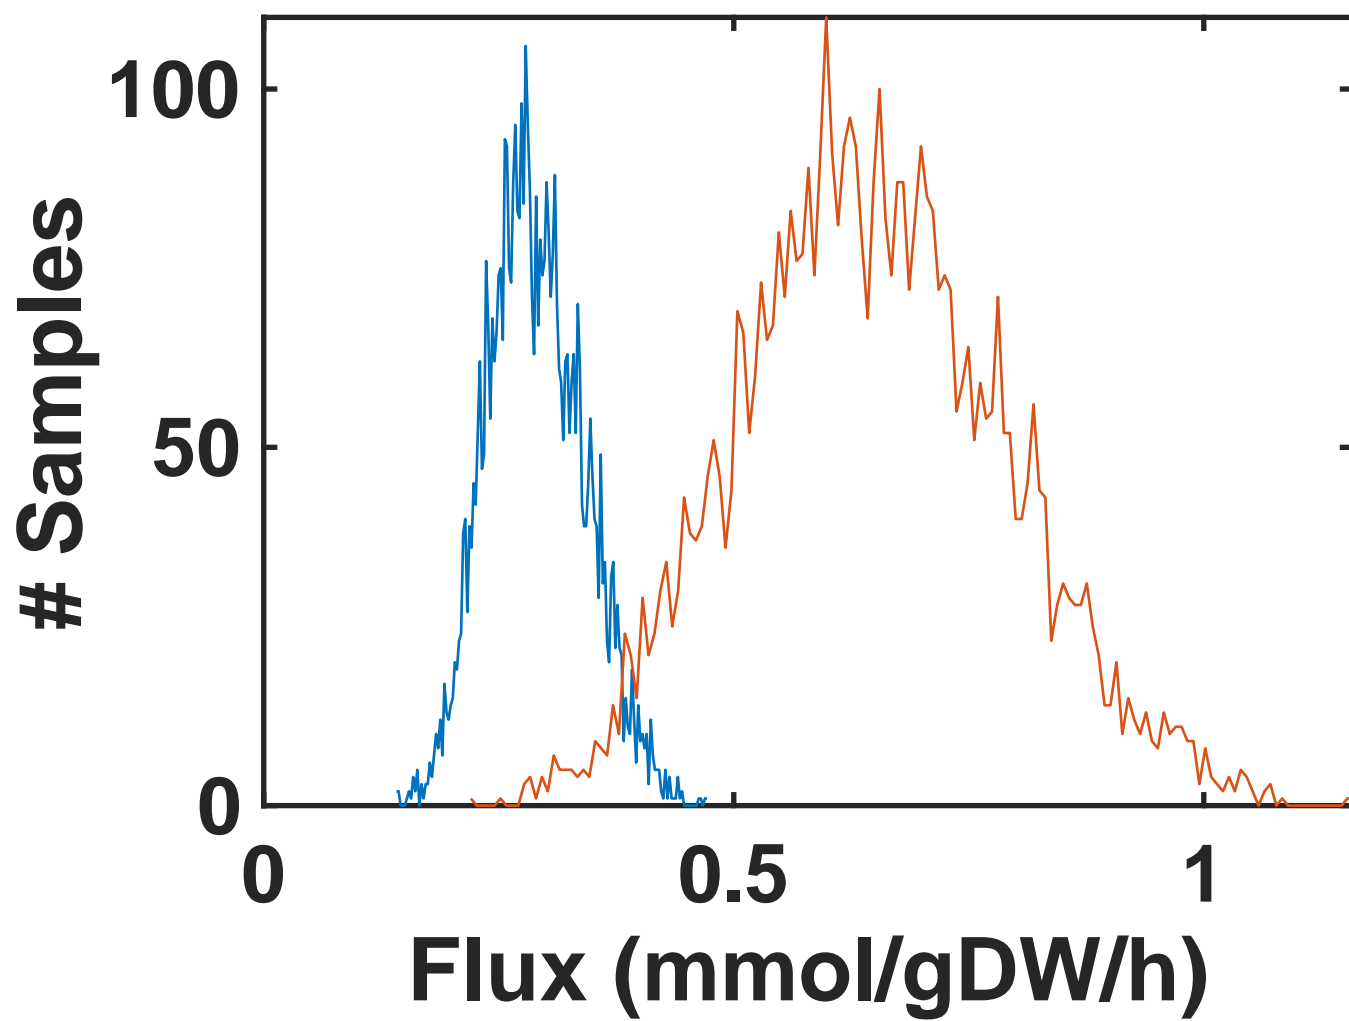

Supplement: s1 [file s1]

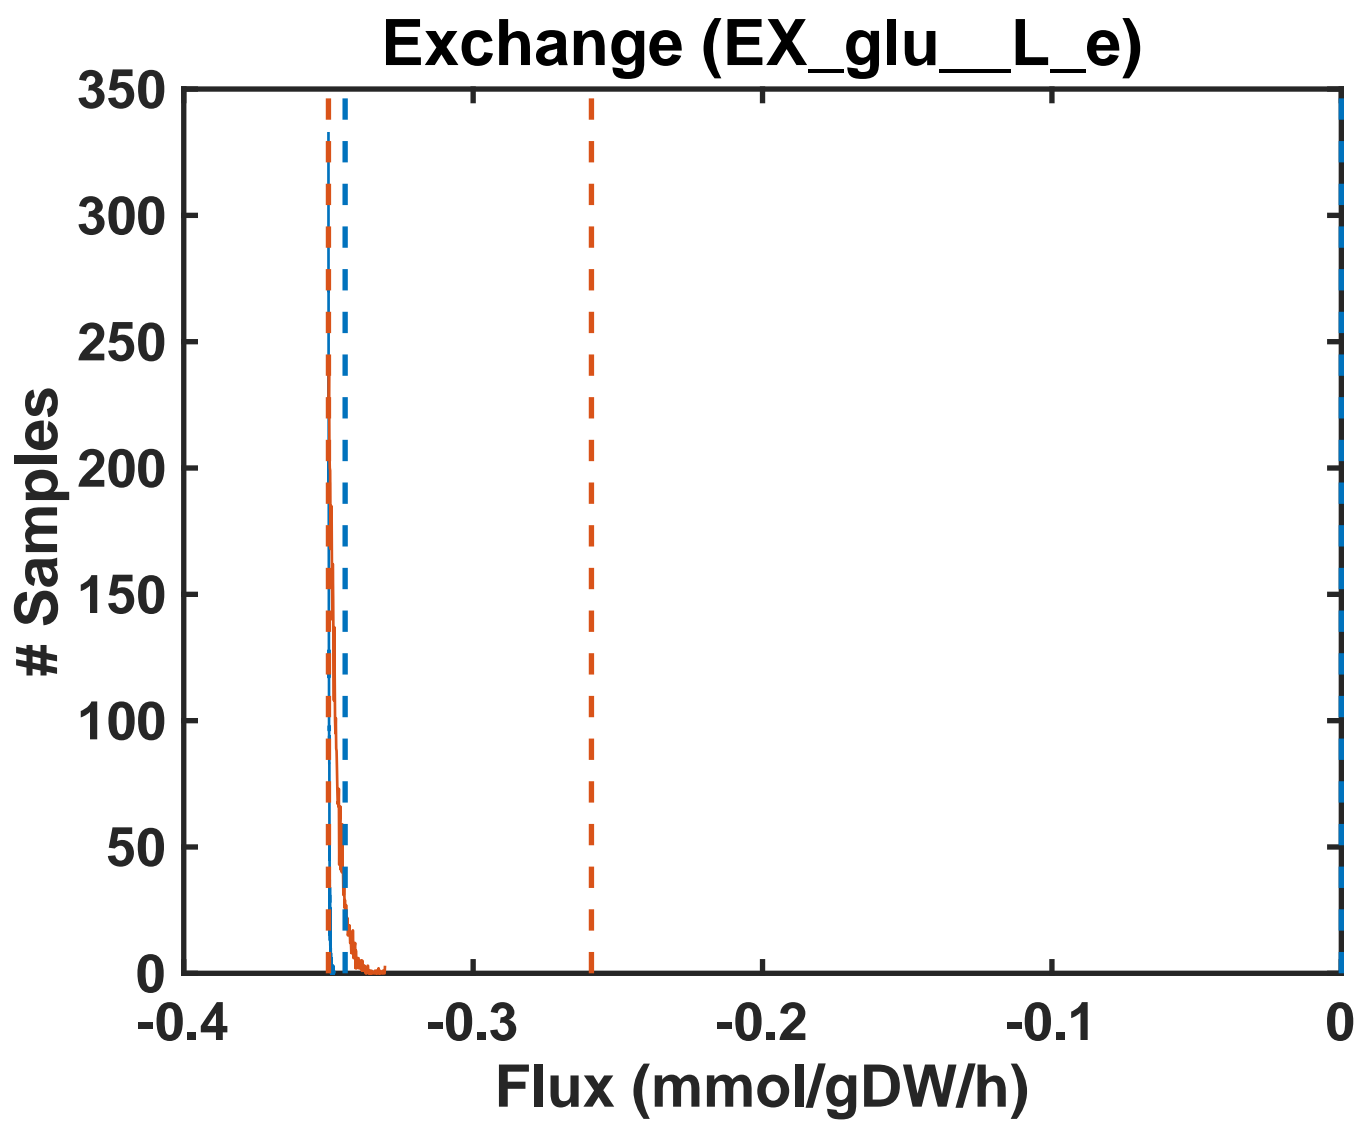

Supplement: s1 [file s1]

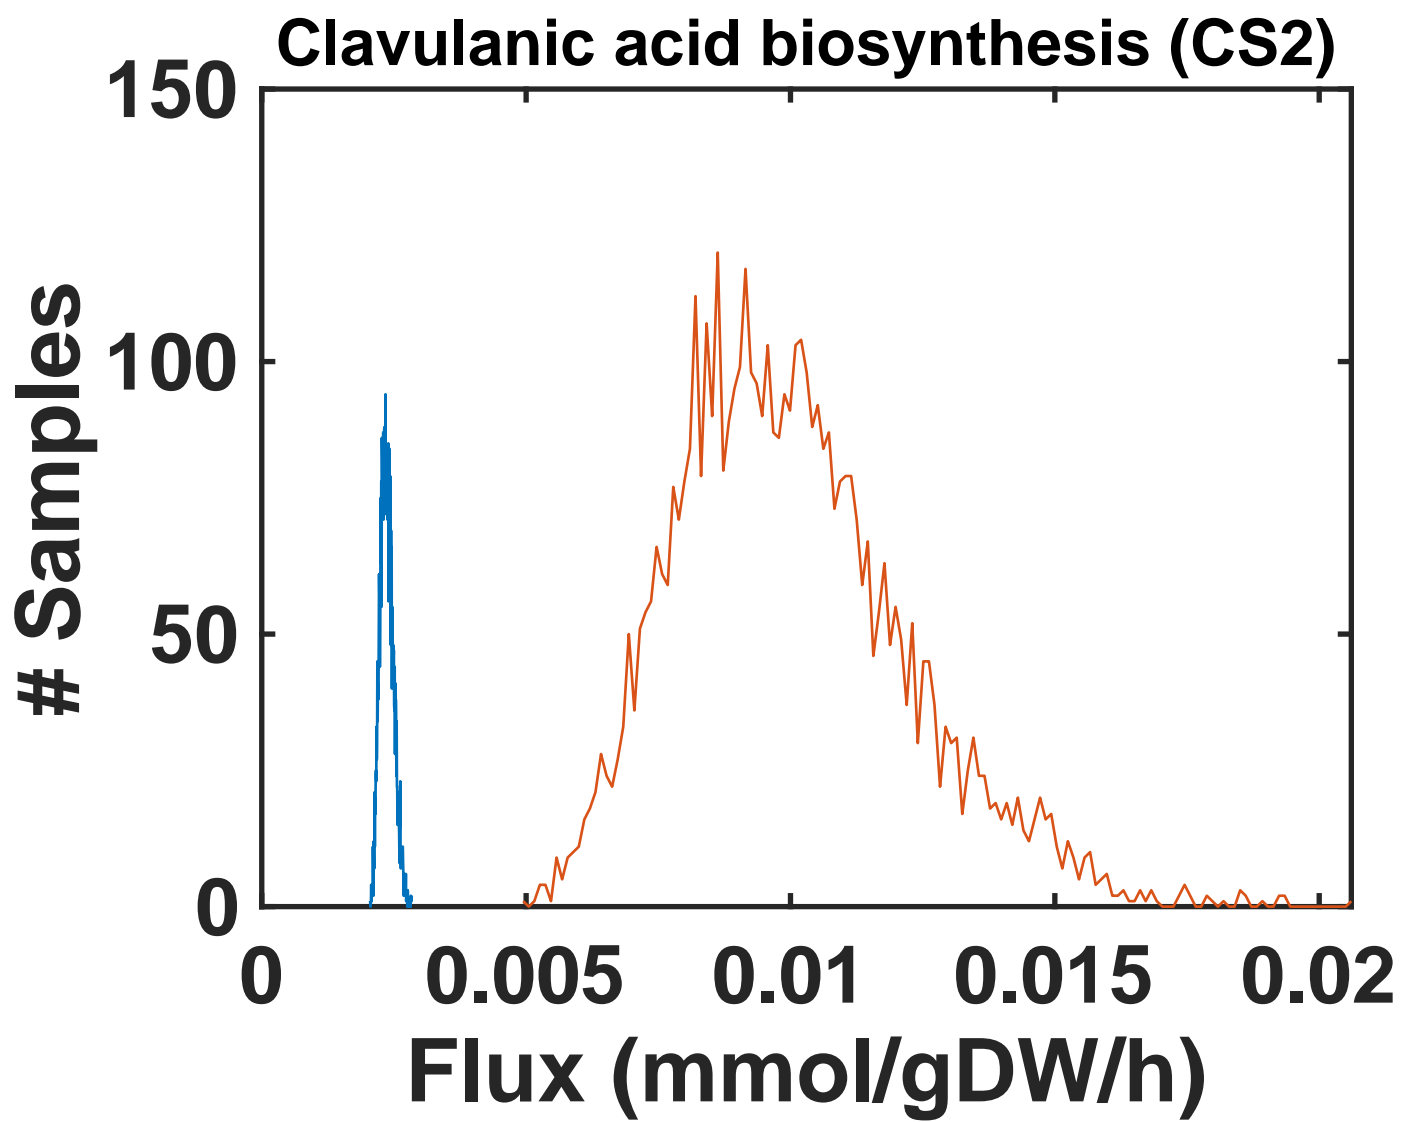

Supplement: s1 [file s1]

## Pentose Phosphate Pathway (RPI)

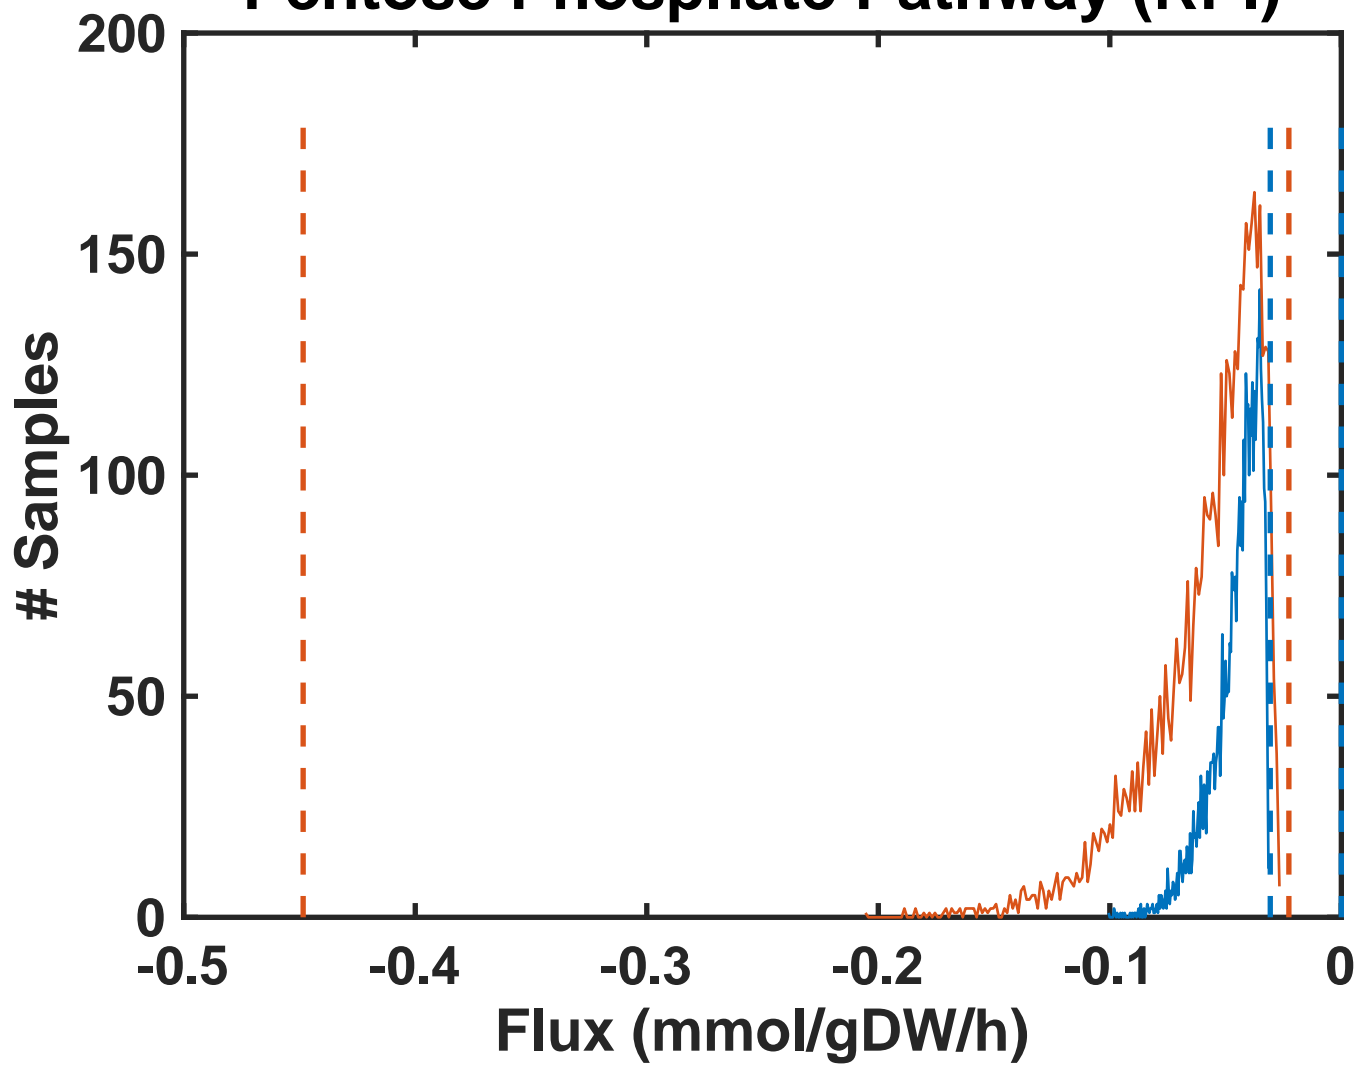

Supplement: s1 [file s1]

## Pyruvate Metabolism (ALCD2x)

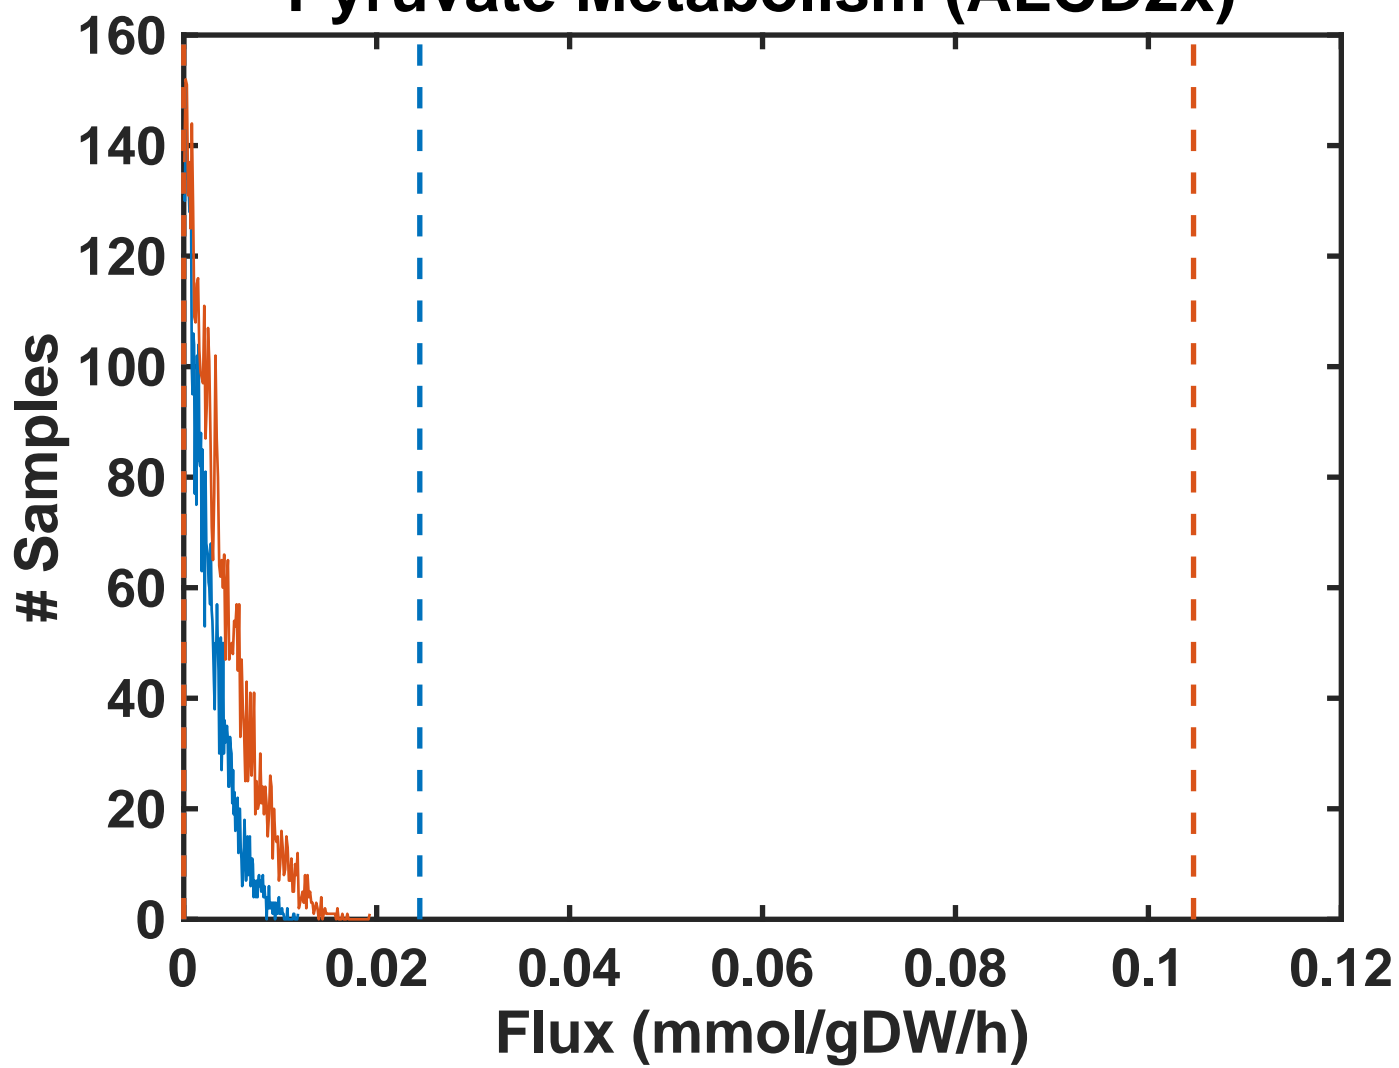

Supplement: s1 [file s1]

## Pyruvate Metabolism (LDH<sub>D</sub>)

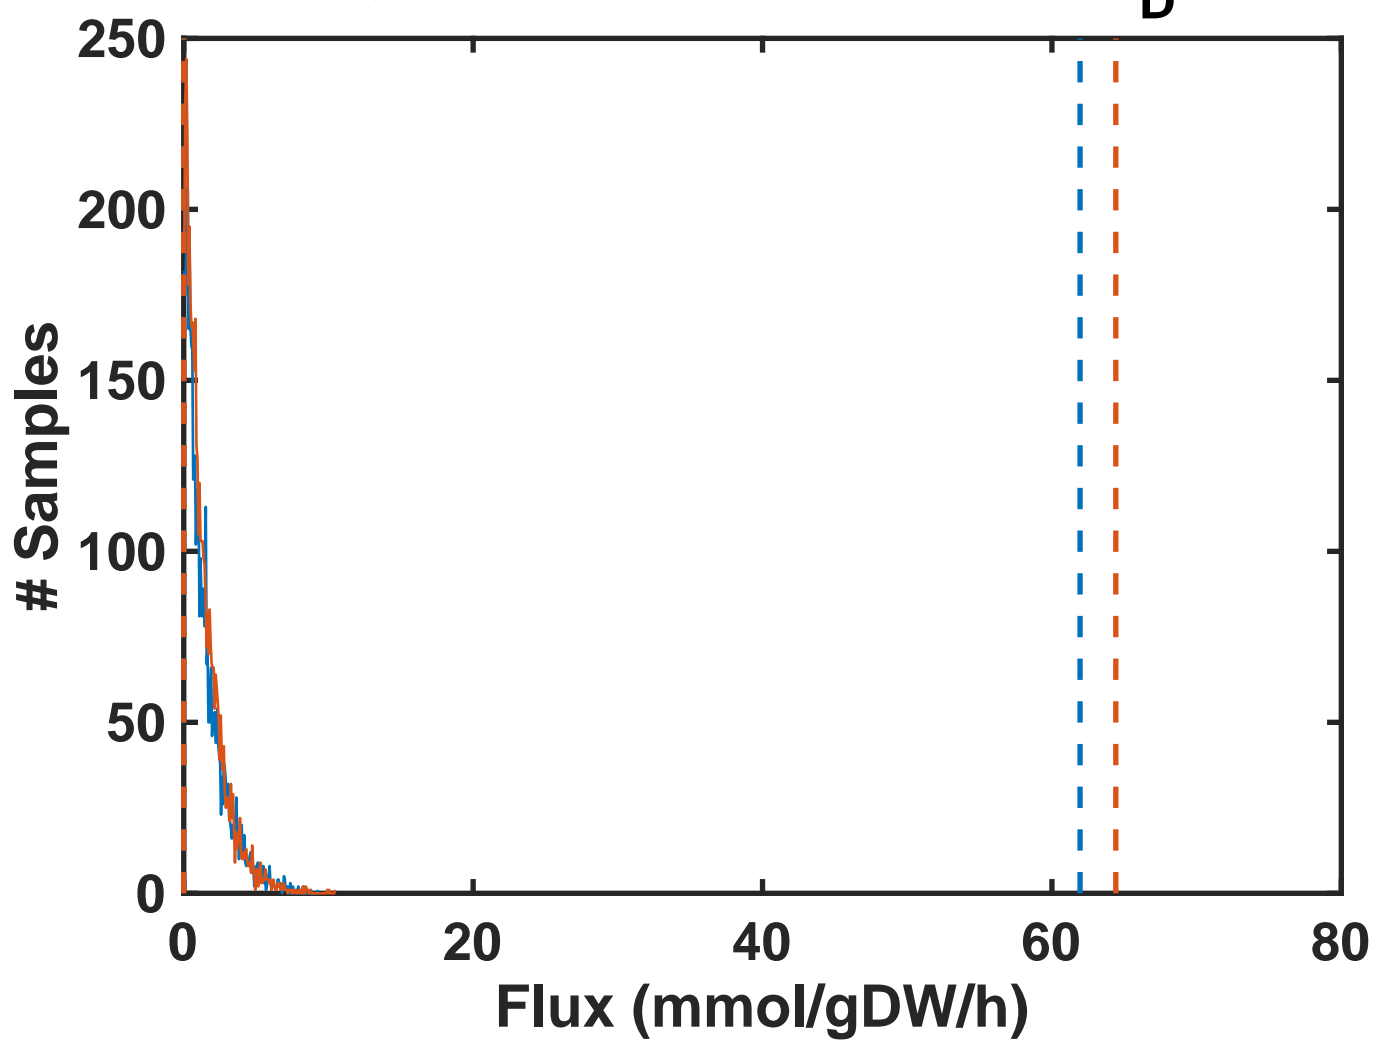

Supplement: s1 [file s1]

# Citric Acid Cycle (FUM)

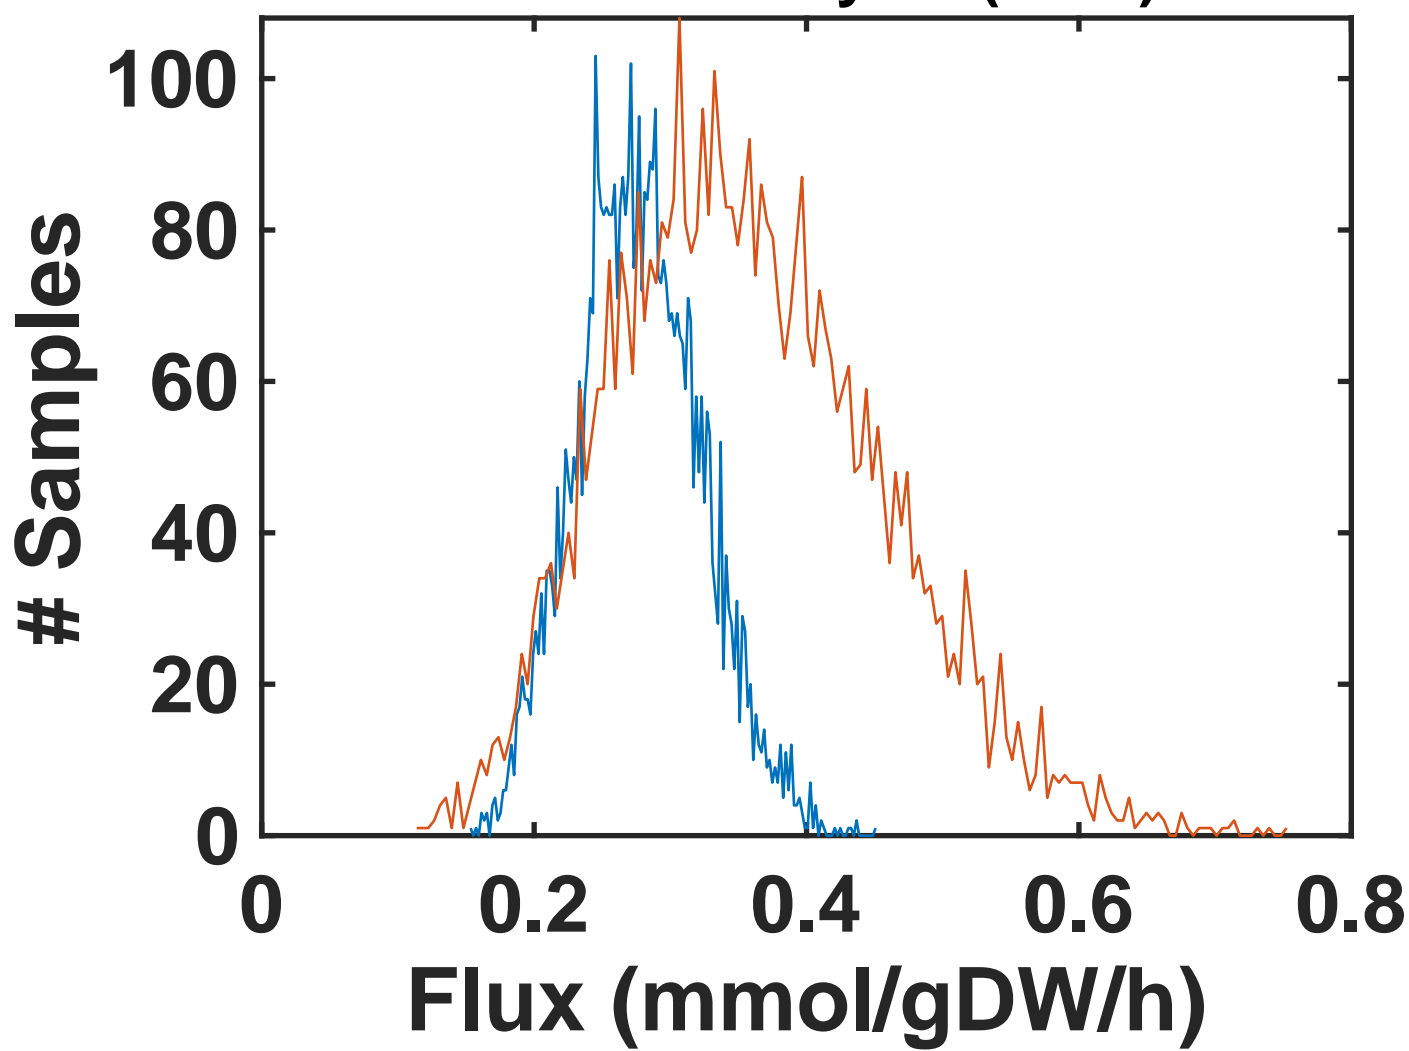

Supplement: s1 [file s1]

## Pyruvate Metabolism (PFL)

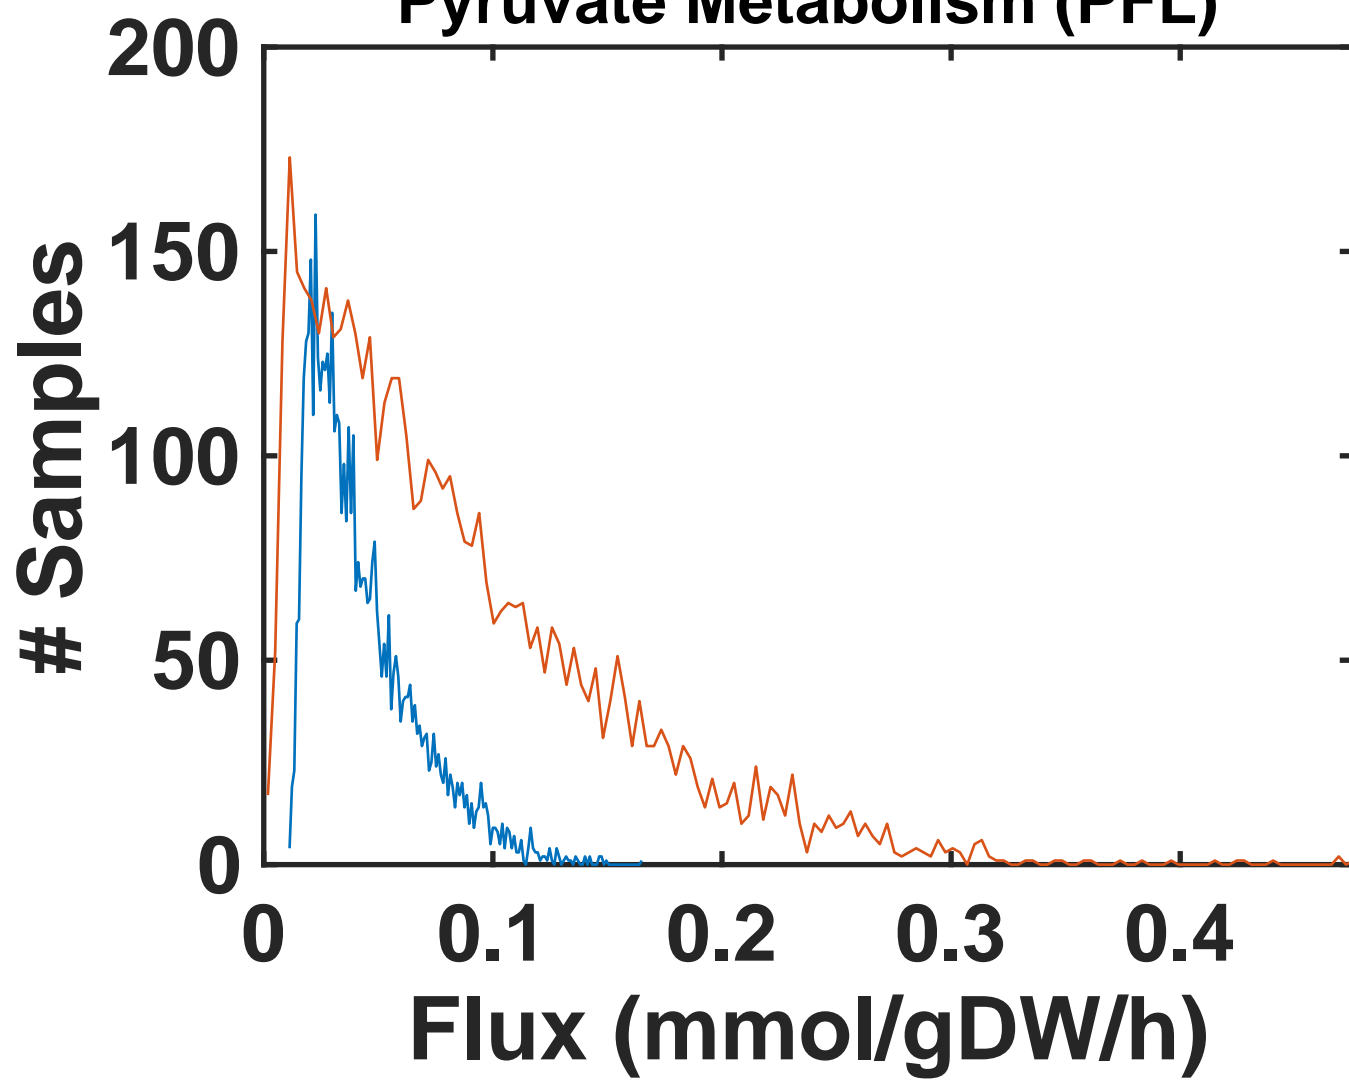

Supplement: s1 [file s1]
